# Supplementary material for: Investigations on Transgenerational Epigenetic Response Down the Male Line in F2 Pigs
Source: PLoS One. 2012 Feb 16;7(2):e30583. doi: 10.1371/journal.pone.0030583 (PMC3281031; doi:10.1371/journal.pone.0030583)
Supplement: Table S1 — Dataset of gluteus muscle mapped to human orthologous genes (XLS). (XLSX) [file pone.0030583.s004.xlsx]

## Sheet: Sheet1
Gluteus medius
List Report
GeneGo Data											analysis_muscle_filtered
#	Input IDs	Network Object Name	Entrez Gene IDs	RefSeq IDs	GenBank IDs	SwissProt IDs	Gene Symbol	Gene Name	Gene Synonyms	Description	Signal	p-value
1	A_72_P254862;A_72_P232822	26S proteasome (19S regulator)	5705	AC_000060;AC_000149;NC_000017;NM_001199163;NM_002805;NP_001186092;NP_002796;NT_010783;NW_001838450;NW_926894	AAB88187;AAB88187.1;AAC41735;AAC41735.1;AAH01932;AAH01932.1;AAH02367;AAH02367.3;ABM83122;ABM86317;AC015651;AC_000060;AC_000149;AF035309;AI193169;AK095836;AK098484;AK290758;AK291878;BAA07919;BAA07919.1;BAF83447;BAF84567;BAF84567.1;BC001932;BC002367;BC127888;BF245599;BP209525;CH471109;CR594383;CR595677;CR604202;CR606458;CR608855;CR610576;CR613856;CR614294;CR619795;CR621341;CR623587;CR626071;D44467;…	A8K763;O35051;O43208;P47210;P52915;P52916;P62195	PSMC5	proteasome (prosome, macropain) 26S subunit, ATPase, 5	26S protease regulatory subunit 8; proteasome 26S subunit ATPase 5; thyroid hormone receptor-interacting protein 1; 26S proteasome AAA-ATPase subunit RPT6; Tat-binding protein homolog 10; proteasome subunit p45; MSUG1 protein; thyroid receptor interactor 1; proteasome 26S ATPase subunit 5		0.3304	0.0001141
2	A_72_P209872	26S proteasome (19S regulator)	5714	AC_000062;AC_000151;NC_000019;NM_002812;NP_002803;NT_011109;NW_001838496;NW_927217	AAC62833;AAC62833.1;AAH01164;AAH01164.3;AAH65006;AAH65006.2;AAV38494;AC005789;AC_000062;AC_000151;AK301771;AK304486;AK308809;BAA07237;BAA07237.1;BAG63230;BAG63230.1;BAG65296;BC001164;BC065006;BC071826;BI560993;BP369299;BQ684248;BT019688;CH471126;CR590029;CR590093;CR595613;CR595906;CR606879;CR618879;D38047;EAW56785;EAW56785.1;NC_000019;NM_002812;NP_002803;NT_011109;NW_001838496;NW_927217;P48556;Q5…	B4DX18;P48556;Q6P1L7	PSMD8	proteasome (prosome, macropain) 26S subunit, non-ATPase, 8	26S proteasome regulatory subunit p31; 26S proteasome non-ATPase regulatory subunit 8; 26S proteasome regulatory subunit RPN12; OTTHUMP00000198258; 26S proteasome regulatory subunit S14		0.2556	0.008032
3	A_72_P153021	26S proteasome (20S core)	5687	AC_000057;AC_000146;NC_000014;NG_011703;NM_002791;NP_002782;NT_026437;NW_001838110;NW_925539	AAG61139;AAH02979;AAH02979.1;AAH17882;AAH17882.1;AAH22354;AAH22354.1;AAH23659;AAH23659.1;AAH70137;AAH70137.1;ABM83272;ABM86477;AC_000057;AC_000146;AF332577;AK298920;AK302008;AK313011;AK316223;AL121594;AL133163;BAA05800;BAG35846;BAG35846.1;BAG61026;BAG63411;BAH14594;BC002979;BC017882;BC022354;BC023659;BC070137;BG701535;CAA42052;CAA42052.1;CAA43964;CAA43964.1;CAG33225;CAG33225.1;CH471078;CR456944;C…	B2R7J9;P34062;P60900;Q6IB60	PSMA6	proteasome (prosome, macropain) subunit, alpha type, 6	macropain iota chain; proteasome subunit alpha type-6; PROS-27; OTTHUMP00000178843; proteasome subunit iota; multicatalytic endopeptidase complex iota chain; prosomal P27K protein; 27 kDa prosomal protein; macropain subunit iota; proteasome iota chain		0.2855	0.004401
4	A_72_P143817	26S proteasome (20S core)	5692	AC_000044;AC_000133;NC_000001;NM_002796;NP_002787;NT_004487;NW_001838529;NW_925683	AAB31085;AAB31085.1;AAP35563;AAP35563.1;ABM81674;ABM82946;ABM86138;AC_000044;AC_000133;AK294149;AK313825;AL589764;BAA05647;BAA05647.1;BAG36560;BAG36560.1;BAG57474;BC000331;BC008314;BC010088;BC010098;BC011768;BC012168;BC017307;BC017451;BC017486;BT006917;CAG33101;CAG33101.1;CAI16806;CAI16806.1;CH471121;CR456820;CR591973;CR596742;CR600806;CR601408;CR604816;CR604973;CR611217;CR612779;CR614383;CR61485…	B2R9L3;P28070;P31148;Q5SZS5;Q6IBI4;Q969L6	PSMB4	proteasome (prosome, macropain) subunit, beta type, 4	proteasome subunit beta type-4; 26 kDa prosomal protein; hsBPROS26; proteasome subunit HsN3; proteasome chain 3; proteasome beta chain; multicatalytic endopeptidase complex beta chain; OTTHUMP00000014463; proteasome subunit, beta type, 4; macropain beta chain		0.2579	0.005218
5	A_72_P139531	ABCA9	10350	AC_000060;AC_000149;NC_000017;NM_080283;NP_525022;NT_010783;NW_001838454;NW_926918	AAH62472;AAH62472.1;AAI67781;AAK30024;AAK30024.1;AAN32751;AAN32751.1;AAN32752;AAN32752.1;AC005922;AC_000060;AC_000149;AF423307;AF423308;AF423309;AF423310;AF423311;AF423312;AF423313;AF423314;AF423315;AF423316;AF423317;AF423318;AF423320;AF423321;AF423322;AF423323;AF423324;AF423325;AF423326;AF423327;AF423328;AF423329;AF423330;AF423331;AF423332;AF423333;AF423334;AF423335;AF423336;AF423337;AF423338;AF…	Q6P655;Q8IUA7;Q8N2S4;Q8WWZ5;Q96MD8	ABCA9	ATP-binding cassette, sub-family A (ABC1), member 9	ATP-binding cassette A9; OTTHUMP00000179123; ATP-binding cassette sub-family A member 9; OTTHUMP00000179122	ATP-binding cassette sub-family A member 9	-0.4025	0.004641
6	A_72_P073316	ACP6	51205	AC_000044;AC_000133;NC_000001;NM_016361;NP_057445;NT_167185;NW_001838511;NW_924906	AAH09965;AAH09965.1;AAH34686;AAH34686.1;AAQ88916;AAQ88916.1;AB030039;AB031478;AB209248;AC_000044;AC_000133;ADQ32397;AK000657;AK308593;AK310693;AL359207;AY358552;BAA89311;BAA89311.1;BAA91310;BAA91310.1;BAA94309;BAA94309.2;BAD92485;BAD92485.1;BC009965;BC011644;BC034686;CAG33382;CAG33382.1;CAI15199;CAI15199.1;CH471223;CR457101;CR598748;CR611952;CR613106;CR620074;EAW50931;HQ447913;NC_000001;NM_016361…	Q59G61;Q5T490;Q6IAQ3;Q7LG81;Q9NPH0;Q9UIG6	ACP6	acid phosphatase 6, lysophosphatidic	lysophosphatidic acid phosphatase type 6; acid phosphatase-like protein 1; OTTHUMP00000015904; acid phosphatase like 1	Lysophosphatidic acid phosphatase type 6	0.2896	0.00615
7	A_72_P197237	ACTR5	79913	AC_000063;AC_000152;NC_000020;NM_024855;NP_079131;NT_011362;NW_001838666;NW_927339	AAH01324;AAH01324.1;AAH06162;AAH06162.1;AAH38402;AAH38402.1;AAO65164;AAO65164.1;AC_000063;AC_000152;AK022847;AL133519;AY211911;BAB14270;BAB14270.1;BC001324;BC006162;BC038402;BF529768;CAD37358;CAD37358.1;CH471077;EAW76010;EAW76011;NC_000020;NM_024855;NP_079131;NT_011362;NW_001838666;NW_927339;Q9H9F9	Q86WF7;Q8IUY5;Q8N724;Q9BRN0;Q9BVB7;Q9H9F9	ACTR5	ARP5 actin-related protein 5 homolog (yeast)	actin-related protein 5; hARP5; ARP5 (actin-related protein 5, yeast) homolog; sarcoma antigen NY-SAR-16; INO80 complex subunit M; OTTHUMP00000030976	Actin-related protein 5	-0.3932	0.001236
8	A_72_P416733	ADAR1	103	AC_000044;AC_000133;NC_000001;NG_011844;NM_001025107;NM_001111;NM_001193495;NM_015840;NM_015841;NP_001020278;NP_001102;NP_001180424;NP_056655;NP_056656;NT_004487;NW_001838529;NW_925683	AA449679;AAB06697;AAB06697.1;AAB97116;AAB97116.1;AAB97117;AAB97117.1;AAB97118;AAB97118.1;AAC13782;AAC13782.1;AAH38227;AAH38227.1;AB209891;ABM73519;ABM73520;ABW03600;ABW03910;AC_000044;AC_000133;AK097241;AK304153;AL592078;AL606500;AL691488;BAD93128;BAH14119;BC017853;BC038227;BE886208;BU430287;BX538232;BX640741;CAA55967;CAA55967.1;CAA55968;CAA55968.1;CAA67169;CAA67169.1;CAA67170;CAA67170.1;CAD98075…	B1AQQ9;B1AQR0;D3DV76;O15223;O43859;O43860;P55265;Q9BYM3;Q9BYM4	ADAR	adenosine deaminase, RNA-specific	dsRNA adenosine deaminase; 136 kDa double-stranded RNA-binding protein; double-stranded RNA-specific adenosine deaminase; interferon-induced protein 4; adenosine deaminase acting on RNA 1-A; OTTHUMP00000035373; OTTHUMP00000035372; OTTHUMP00000231779; interferon-inducible protein 4	Double-stranded RNA-specific adenosine deaminase	0.4705	0.002021
9	A_72_P147006	AMYC	280	AC_000044;AC_000133;NC_000001;NG_004750;NM_020978;NP_066188;NT_032977;NW_001838589;NW_921795	AAA35525;AAA35525.1;AAA51725;AAA51725.1;AAH11179;AAH11179.1;AAH20861;AAH20861.1;AC105272;AC_000044;AC_000133;AK095605;AK127047;BAA14130;BAA14130.1;BAG53093;BAG54429;BAG54429.1;BC011179;BC020861;BX456665;CAA30100;CAA30100.1;CH471097;D90097;DQ786288;EAW72902;EAW72902.1;EAW72903;EAW72903.1;EAW72904;EAW72904.1;M18670;M24895;NC_000001;NG_004750;NM_020978;NP_066188;NT_032977;NW_001838589;NW_921795;P199…	B3KXB7;D3DT76;P19961;Q9UBH3	AMY2B	amylase, alpha 2B (pancreatic)	carcinoid alpha-amylase; OTTHUMP00000012697; 1,4-alpha-D-glucan glucanohydrolase 2B; alpha-amylase 2B; amylase, alpha 2B; pancreatic; OTTHUMP00000012696; glycogenase; alpha-amylase carcinoid	Alpha-amylase 2B	1.137	5.68e-05
10	A_72_P147006	AMYP	279	AC_000044;AC_000133;NC_000001;NG_004750;NM_000699;NP_000690;NT_032977;NW_001838589;NW_921906;NW_924888	AAA51723;AAA51723.1;AAA51724;AAA51724.1;AAA52280;AAA52280.1;AAH07060;AAH07060.1;AAI46998;ABM83827;ABM87150;AC105272;AC_000044;AC_000133;AK223463;BAD97183;BC007060;BC146997;CAA30099;CAA30099.1;CAN87444;CS588494;DQ892901;DQ896151;M18669;M18714;M18716;M18718;M18720;M18722;M18724;M18726;M18783;M18785;M28443;NC_000001;NG_004750;NM_000699;NP_000690;NT_032977;NW_001838589;NW_921906;NW_924888;P04746;Q53F…	P04746;Q9UBH3	AMY2A	amylase, alpha 2A (pancreatic)	amylase, pancreatic, alpha-2A; pancreatic alpha-amylase; amylase, alpha 2A; pancreatic; pancreatic amylase 2A; found in the pancreas; pancreatic amylase alpha 2A; 1,4-alpha-D-glucan glucanohydrolase; glycogenase; alpha-amylase; OTTHUMP00000012694	Pancreatic alpha-amylase	1.137	5.68e-05
11	A_72_P147006	AMYS	276	AC_000044;AC_000133;NC_000001;NG_004750;NM_001008221;NM_004038;NP_001008222;NP_004029;NT_032977;NW_001838590;NW_922017;NW_924553;NW_927130	AAA16183;AAA16183.2;AAA52279;AAA52279.1;AAA57345;AAA57345.1;AAA58368;AAA58368.1;AAH63129;AAH63129.1;AAH69347;AAH69347.1;AAH69463;AAH69463.1;AAH70302;AAH92444;AAH92444.1;AAI32986;AAI32986.1;AAI32988;AAI32988.1;AAI32996;AAI32996.1;AAI32998;AAI32998.1;AAI44453;AC105272;AC_000044;AC_000133;AK292341;AL513482;BAF85030;BAF85030.1;BC063129;BC069347;BC069463;BC070302;BC092444;BC132985;BC132987;BC132995;BC…	A6NJS5;A8K8H6;P04745;Q13763;Q5T083	AMY1A	amylase, alpha 1A (salivary)	salivary alpha-amylase; 1,4-alpha-D-glucan glucanohydrolase 1; alpha-amylase 1; amylase, alpha 1A; salivary; salivary amylase alpha 1A; glycogenase; amylase, salivary, alpha-1A; OTTHUMP00000012688	Alpha-amylase 1	1.137	5.68e-05
12	A_72_P147006	AMYS	277	NC_000001;NG_004750;NM_001008218;NP_001008219;NT_032977	AAA16183.2;AAA52279.1;AAA57345.1;AAA58368.1;AAH63129;AAH63129.1;AAH69347;AAH69347.1;AAH69463;AAH69463.1;AAH70302;AAH92444;AAH92444.1;AAI32986;AAI32986.1;AAI32988;AAI32988.1;AAI32996;AAI32996.1;AAI32998;AAI32998.1;AAI44453;AAI72291;AI627716;AK292341;AL513482;BAF85030;BAF85030.1;BC063129;BC069347;BC069463;BC070302;BC092444;BC132985;BC132987;BC132995;BC132997;BC144452;BC172291;CAI14928;CAI14928.1;CA…	A6NJS5;A8K8H6;P04745;Q13763;Q5T083	AMY1B	amylase, alpha 1B (salivary)	alpha-amylase 1; salivary alpha-amylase; salivary amylase alpha 1B; amylase, salivary, alpha-1B; 1,4-alpha-D-glucan glucanohydrolase 1; amylase, alpha 1B; salivary; OTTHUMP00000012691; glycogenase	Alpha-amylase 1	1.137	5.68e-05
13	A_72_P147006	AMYS	278	NC_000001;NG_004750;NM_001008219;NP_001008220;NT_032977	AAA16183.2;AAA52279.1;AAA57345.1;AAA58368.1;AAH63129;AAH63129.1;AAH69347;AAH69347.1;AAH69463;AAH69463.1;AAH70302;AAH92444;AAH92444.1;AAI32986;AAI32986.1;AAI32988;AAI32988.1;AAI32996;AAI32996.1;AAI32998;AAI32998.1;AAI44453;AAI46451;AAI56581;AI687773;AK292341;AL513482;BAF85030;BAF85030.1;BC063129;BC069347;BC069463;BC070302;BC092444;BC132985;BC132987;BC132995;BC132997;BC144452;BC146450;BC156580;CAI1…	A6NJS5;A8K8H6;P04745;Q13763;Q5T083	AMY1C	amylase, alpha 1C (salivary)	salivary alpha-amylase; alpha-amylase 1; salivary amylase alpha 1C; amylase, alpha 1C; salivary; glycogenase; amylase, salivary, alpha-1C; OTTHUMP00000012722; 1,4-alpha-D-glucan glucanohydrolase 1	Alpha-amylase 1	1.137	5.68e-05
14	A_72_P434484	ANGPTL6	83854	AC_000062;AC_000151;NC_000019;NM_031917;NP_114123;NT_011295;NW_001838483;NW_927195	AAI42633;AAI42633.1;AAK06404;AAK06404.1;AAQ88643;AAQ88643.1;AB054064;AC020931;AC_000062;AC_000151;AF230330;AY358276;BAB91248;BAB91248.1;BC142632;CH471106;CR591845;CR617920;CR621970;EAW84071;EAW84071.1;EAW84072;NC_000019;NM_031917;NP_114123;NT_011295;NW_001838483;NW_927195;Q8NI99	A5PKV7;Q8NI99;Q9BZZ0	ANGPTL6	angiopoietin-like 6	angiopoietin-related protein 6; angiopoietin-related growth factor; angiopoietin-like protein 6; angiopoietin-related protein 5	Angiopoietin-related protein 6	0.3351	0.002594
15	A_72_P185201	AP4A	318	AC_000052;AC_000141;NC_000009;NM_001161;NM_147172;NM_147173;NP_001152;NP_671701;NP_671702;NT_008413;NW_001839149;NW_924062	AA398857;AAC50277;AAC50277.1;AAH04926;AAH04926.1;ABM83899;ABM87220;AC_000052;AC_000141;AL353662;AL356494;BC004926;BG622439;BM802700;CAI15964;CAI15964.1;CH471071;DQ892973;DQ896221;EAW58461;EAW58461.1;EAW58462;EAW58462.1;EAW58463;EAW58463.1;NC_000009;NM_001161;NM_147172;NM_147173;NP_001152;NP_671701;NP_671702;NT_008413;NW_001839149;NW_924062;P50583;U30313	D3DRM0;P50583;Q5T589	NUDT2	nudix (nucleoside diphosphate linked moiety X)-type motif 2	diadenosine 5',5''-P1,P4-tetraphosphate pyrophosphohydrolase; bis(5'-nucleosyl)-tetraphosphatase (asymmetrical); nucleoside diphosphate-linked moiety X motif 2; nudix motif 2; bis(5'-nucleosyl)-tetraphosphatase [asymmetrical]; diadenosine 5',5'''-P1,P4-tetraphosphate asymmetrical hydrolase; diadenosine tetraphosphatase; OTTHUMP00000021259; OTTHUMP00000021256; OTTHUMP00000021257; OTTHUMP0000002125…	Bis(5'-nucleosyl)-tetraphosphatase [asymmetrical]	0.6769	0.0002233
16	A_72_P432274	APITD1	378708	NM_199294;NP_954988;NR_036462	AAH29430;AAH29430.1;AAM61954.1;AAM70482.1;ADQ32275;AF516753;AF521016;AL139424;AL354956;BC029430;BE858209;BG213105;BG546364;BM905996;BU902753;CA311915;CAI19199;CAI19199.1;CAI19200.1;CAI19201.1;CAI95755;CAI95755.1;CAI95756.1;CAI95757.1;CH471130;CR593315;CR593499;EAW71654;HQ447791;NM_199294;NP_954988;NR_036462;Q8N2Z9	Q8N2Z9;Q8NFE5;Q8NFG5	APITD1	apoptosis-inducing, TAF9-like domain 1	Fanconi anemia-associated polypeptide of 16 kDa; apoptosis-inducing TAF9-like domain-containing protein 1; FANCM-interacting histone fold protein 1; OTTHUMP00000222023; OTTHUMP00000065120; centromere protein S; OTTHUMP00000065118	Centromere protein S	0.4501	0.004832
17	A_72_P432274	APITD1-CORT	100526739	NM_198544;NM_199006;NP_940946;NP_950171;NR_037186;NR_037187	AA858169;AAM61954;AAM70482;AF516753;AF521016;AL139424;AL354956;CAI19200;CAI19201;CAI95756;CAI95757;CF127457;CF128105;CH471130;EAW71649;EAW71651;EAW71652;EAW71653;NM_198544;NM_199006;NP_940946;NP_950171;NR_037186;NR_037187	No ID	APITD1-CORT	APITD1-CORT readthrough	APITD1-CORT read-through; APITD1-CORT protein; OTTHUMP00000222023	APITD1-CORT read-through	0.4501	0.004832
18	A_72_P223747	APOBEC3	9582	AC_000065;AC_000154;NC_000022;NM_004900;NP_004891;NT_011520;NW_001838745;NW_927628	AAD00089;AAD00089.1;AAD00090;AAD00090.1;AAH53859;AAH53859.1;AAW31743;AAW31743.1;AC_000065;AC_000154;AK024854;AL022318;AY743217;BC031803;BC053859;CAB45270;CAB45270.1;CAJ86440;CAK54382;CAK54462;CAK54681;CAK54761;CAQ09851;CAQ09852;CH471095;CT841510;CU012951;CU013031;CU013239;CU013319;EAW60279;EAW60280;EAW60281;EAW60282;NC_000022;NM_004900;NP_004891;NT_011520;NW_001838745;NW_927628;Q20WL1;Q9UH17;U610…	O95618;Q5IFJ4;Q7Z2N3;Q7Z6D6;Q9UE74;Q9UH17	APOBEC3B	apolipoprotein B mRNA editing enzyme, catalytic polypeptide-like 3B	cytidine deaminase; probable DNA dC->dU-editing enzyme APOBEC-3B; phorbolin-1-related protein; OTTHUMP00000199089; phorbolin 2; OTTHUMP00000199090; phorbolin 3; OTTHUMP00000199088; phorbolin-2/3		-0.4044	0.006795
19	A_72_P223747	APOBEC3B	9582	AC_000065;AC_000154;NC_000022;NM_004900;NP_004891;NT_011520;NW_001838745;NW_927628	AAD00089;AAD00089.1;AAD00090;AAD00090.1;AAH53859;AAH53859.1;AAW31743;AAW31743.1;AC_000065;AC_000154;AK024854;AL022318;AY743217;BC031803;BC053859;CAB45270;CAB45270.1;CAJ86440;CAK54382;CAK54462;CAK54681;CAK54761;CAQ09851;CAQ09852;CH471095;CT841510;CU012951;CU013031;CU013239;CU013319;EAW60279;EAW60280;EAW60281;EAW60282;NC_000022;NM_004900;NP_004891;NT_011520;NW_001838745;NW_927628;Q20WL1;Q9UH17;U610…	O95618;Q5IFJ4;Q7Z2N3;Q7Z6D6;Q9UE74;Q9UH17	APOBEC3B	apolipoprotein B mRNA editing enzyme, catalytic polypeptide-like 3B	cytidine deaminase; probable DNA dC->dU-editing enzyme APOBEC-3B; phorbolin-1-related protein; OTTHUMP00000199089; phorbolin 2; OTTHUMP00000199090; phorbolin 3; OTTHUMP00000199088; phorbolin-2/3	Probable DNA dC->dU-editing enzyme APOBEC-3B	-0.4044	0.006795
20	A_72_P223747	APOBEC3H	164668	AC_000065;AC_000154;NC_000022;NM_001166002;NM_001166003;NM_001166004;NM_181773;NP_001159474;NP_001159475;NP_001159476;NP_861438;NT_011520;NW_001838745;NW_927628	AAH69023;AAH69023.1;ACK77772;ACK77773;ACK77774;ACK77775;ACK77776;ACK77777;ACK77778;AC_000065;AC_000154;AL031846;BC069023;BQ052182;BQ054330;BU585251;CAG30367;CAG30367.3;CAQ07272;CAQ07272.1;CAQ07273;CAQ07273.1;CH471095;CR456481;EAW60294;EAW60295;EAW60296;FJ376611;FJ376612;FJ376613;FJ376614;FJ376615;FJ376616;FJ376617;NC_000022;NM_001166002;NM_001166003;NM_001166004;NM_181773;NP_001159474;NP_00115947…	B0QYP0;B0QYP1;Q5JYL9;Q6IC87;Q6NTF7	APOBEC3H	apolipoprotein B mRNA editing enzyme, catalytic polypeptide-like 3H	ARP-10; APOBEC-related protein 10; DNA dC->dU-editing enzyme APOBEC-3H; apolipoprotein B mRNA-editing enzyme catalytic polypeptide-like 3H; OTTHUMP00000199086; OTTHUMP00000199085	DNA dC->dU-editing enzyme APOBEC-3H	-0.4044	0.006795
21	A_72_P058681	ARMC1	55156	AC_000051;AC_000140;NC_000008;NM_018120;NP_060590;NT_008183;NW_001839132;NW_923929	AAH11607;AAH11607.1;AC055822;AC100814;AC_000051;AC_000140;ADQ31864;AK001373;AK024053;AK304463;AL512767;BAA91656;BAA91656.1;BAB14803;BAB14803.1;BAG65279;BC011607;BC018846;CAC21684;CAC21684.1;CH471068;CR625619;EAW86880;HQ447378;NC_000008;NM_018120;NP_060590;NT_008183;NW_001839132;NW_923929;Q9NVT9	Q9H018;Q9H820;Q9NVT9	ARMC1	armadillo repeat containing 1	OTTHUMP00000226552; armadillo repeat-containing protein 1	Armadillo repeat-containing protein 1	0.7982	0.001303
22	A_72_P124511	ATE1	11101	AC_000053;AC_000142;NC_000010;NM_001001976;NM_007041;NP_001001976;NP_008972;NT_030059;NW_001838006;NW_924884	AAD12366;AAD12366.1;AAD12367;AAD12367.1;AAH22026;AAH22026.2;ABM83018;ABM86211;AC025947;AC_000053;AC_000142;AF079098;AF079099;AK124669;AK292657;AK295642;AK296356;AK299101;AK303604;AK308926;AK313057;AL731542;AL731566;BAF85346;BAG35887;BAG54065;BAG58513;BAG59037;BAG61160;BAG64619;BC022026;CAI12918;CAI12918.1;CAI12919;CAI14813;CAI14813.1;CAI14814;CH471066;DQ892092;DQ895285;EAW49334;EAW49334.1;EAW4933…	O95260;O95261;Q5SQQ3;Q8WW04	ATE1	arginyltransferase 1	OTTHUMP00000020637; OTTHUMP00000020638; arginyl-tRNA--protein transferase 1; arginyl-tRNA-protein transferase; arginine-tRNA--protein transferase 1; R-transferase 1	Arginyl-tRNA--protein transferase 1	-0.3209	0.008643
23	A_72_P203782	ATP synthase	10632	AC_000054;AC_000143;NC_000011;NM_006476;NP_006467;NR_033759;NT_033899;NW_001838042;NW_925173	AA258888;AAC61597;AAC61597.1;AAD20961;AAD20961.1;AAH15128;AAH15128.1;AAH70165;AAH70165.1;AAP97159;AAP97159.1;AC_000054;AC_000143;AF070655;AF087846;AF092124;AI337729;AK289568;AL050277;AM393064;AM393513;AP001267;BAF82257;BAF82257.1;BC015128;BC070165;BU953217;CAB43378;CAB43378.1;CAG38525;CAG38525.1;CAG47007;CAG47007.1;CAL37942;CAL38390;CH471065;CR533494;CR542211;EAW67376;EAW67376.1;NC_000011;NM_0064…	A8K0K3;O75964;Q96BV6;Q9UBZ7	ATP5L	ATP synthase, H+ transporting, mitochondrial Fo complex, subunit G	ATP synthase, H+ transporting, mitochondrial F0 complex, subunit G; ATP synthase g chain, mitochondrial; ATP synthase subunit g, mitochondrial; ATP synthase, H+ transporting, mitochondrial F0 complex, subunit g; F1F0-type ATP synthase subunit g; OTTHUMP00000232646; ATPase subunit G; F1Fo-ATP synthase complex Fo membrane domain g subunit; ATP synthase, H+ transporting, mitochondrial F1F0, subunit g		-0.3821	0.006231
24	A_72_P203782	ATP synthase subunit g 2, mitochondrial	267020	AC_000065;AC_000154;NC_000022;NG_012194;NM_001165877;NP_001159349;NT_011520;NW_001838747;NW_927650	AAP97217;AAP97217.1;AC_000065;AC_000154;AF092923;BC093719;BC093721;NC_000022;NG_012194;NM_001165877;NP_001159349;NT_011520;NW_001838747;NW_927650;Q7Z4Y8;Z93241	Q7Z4Y8	ATP5L2	ATP synthase, H+ transporting, mitochondrial Fo complex, subunit G2	OTTHUMP00000220201; ATPase subunit g 2; ATP synthase, H+ transporting, mitochondrial F0 complex, subunit G2; ATP synthase, H+ transporting, mitochondrial F0 complex, subunit G2 pseudogene; ATP synthase subunit g 2, mitochondrial; ATP synthase, H+ transporting, mitochondrial F0 complex, subunit g, isoform 2; ATP synthase, H+ transporting, mitochondrial F1F0, subunit g	ATP synthase subunit g 2, mitochondrial	-0.3821	0.006231
25	A_72_P203782	ATP(F0)	10632	AC_000054;AC_000143;NC_000011;NM_006476;NP_006467;NR_033759;NT_033899;NW_001838042;NW_925173	AA258888;AAC61597;AAC61597.1;AAD20961;AAD20961.1;AAH15128;AAH15128.1;AAH70165;AAH70165.1;AAP97159;AAP97159.1;AC_000054;AC_000143;AF070655;AF087846;AF092124;AI337729;AK289568;AL050277;AM393064;AM393513;AP001267;BAF82257;BAF82257.1;BC015128;BC070165;BU953217;CAB43378;CAB43378.1;CAG38525;CAG38525.1;CAG47007;CAG47007.1;CAL37942;CAL38390;CH471065;CR533494;CR542211;EAW67376;EAW67376.1;NC_000011;NM_0064…	A8K0K3;O75964;Q96BV6;Q9UBZ7	ATP5L	ATP synthase, H+ transporting, mitochondrial Fo complex, subunit G	ATP synthase, H+ transporting, mitochondrial F0 complex, subunit G; ATP synthase g chain, mitochondrial; ATP synthase subunit g, mitochondrial; ATP synthase, H+ transporting, mitochondrial F0 complex, subunit g; F1F0-type ATP synthase subunit g; OTTHUMP00000232646; ATPase subunit G; F1Fo-ATP synthase complex Fo membrane domain g subunit; ATP synthase, H+ transporting, mitochondrial F1F0, subunit g		-0.3821	0.006231
26	A_72_P139531	ATP-binding cassette sub-family A member 9	10350	AC_000060;AC_000149;NC_000017;NM_080283;NP_525022;NT_010783;NW_001838454;NW_926918	AAH62472;AAH62472.1;AAI67781;AAK30024;AAK30024.1;AAN32751;AAN32751.1;AAN32752;AAN32752.1;AC005922;AC_000060;AC_000149;AF423307;AF423308;AF423309;AF423310;AF423311;AF423312;AF423313;AF423314;AF423315;AF423316;AF423317;AF423318;AF423320;AF423321;AF423322;AF423323;AF423324;AF423325;AF423326;AF423327;AF423328;AF423329;AF423330;AF423331;AF423332;AF423333;AF423334;AF423335;AF423336;AF423337;AF423338;AF…	Q6P655;Q8IUA7;Q8N2S4;Q8WWZ5;Q96MD8	ABCA9	ATP-binding cassette, sub-family A (ABC1), member 9	ATP-binding cassette A9; OTTHUMP00000179123; ATP-binding cassette sub-family A member 9; OTTHUMP00000179122	ATP-binding cassette sub-family A member 9	-0.4025	0.004641
27	A_72_P401408	ATP11C	286410	AC_000066;AC_000155;NC_000023;NG_016550;NM_001010986;NM_173694;NP_001010986;NP_775965;NT_011786;NW_001842405;NW_927722	AA829385;AAI72372;AC_000066;AC_000155;AJ580093;AJ580094;AK091552;AK093835;AK125474;AK125476;AK125986;AK131262;AL161777;AL356785;AL590077;BAC03692;BAC03692.1;BAC86172;BAC86172.1;BAC86377;BAC86377.1;BAD18440;BAD18440.1;BC132728;BC132730;BC172372;BX648320;BX648981;CAE30472;CAE30472.1;CAE30473;CAE30473.1;CAI39713;CAI39713.1;CAI39714;CAI39714.1;CAI39716;CAI39716.1;CAI40418;CAI40418.1;CAI41444;CAI41444…	Q5JT69;Q5JT70;Q5JT71;Q5JT72;Q5JT73;Q6ZND5;Q6ZU50;Q6ZUP7;Q70IJ9;Q70IK0;Q8NB49;Q8WX24	ATP11C	ATPase, class VI, type 11C	probable phospholipid-transporting ATPase IG; OTTHUMP00000024161; OTTHUMP00000215065; ATPase, Class VI, type 11C; OTTHUMP00000215081; phospholipid-transporting ATPase IG	Probable phospholipid-transporting ATPase IG	-0.2598	0.001713
28	A_72_P203782	ATP5L	10632	AC_000054;AC_000143;NC_000011;NM_006476;NP_006467;NR_033759;NT_033899;NW_001838042;NW_925173	AA258888;AAC61597;AAC61597.1;AAD20961;AAD20961.1;AAH15128;AAH15128.1;AAH70165;AAH70165.1;AAP97159;AAP97159.1;AC_000054;AC_000143;AF070655;AF087846;AF092124;AI337729;AK289568;AL050277;AM393064;AM393513;AP001267;BAF82257;BAF82257.1;BC015128;BC070165;BU953217;CAB43378;CAB43378.1;CAG38525;CAG38525.1;CAG47007;CAG47007.1;CAL37942;CAL38390;CH471065;CR533494;CR542211;EAW67376;EAW67376.1;NC_000011;NM_0064…	A8K0K3;O75964;Q96BV6;Q9UBZ7	ATP5L	ATP synthase, H+ transporting, mitochondrial Fo complex, subunit G	ATP synthase, H+ transporting, mitochondrial F0 complex, subunit G; ATP synthase g chain, mitochondrial; ATP synthase subunit g, mitochondrial; ATP synthase, H+ transporting, mitochondrial F0 complex, subunit g; F1F0-type ATP synthase subunit g; OTTHUMP00000232646; ATPase subunit G; F1Fo-ATP synthase complex Fo membrane domain g subunit; ATP synthase, H+ transporting, mitochondrial F1F0, subunit g	ATP synthase subunit g, mitochondrial	-0.3821	0.006231
29	A_72_P043036	ATP6(V)	528	AC_000051;AC_000140;NC_000008;NM_001695;NP_001686;NT_008046;NW_001839136;NW_923984	AA242944;AAA36803;AAA36803.1;AAH10960;AAH10960.1;AAL50383;AAL50383.1;ACE86916;ACE87603;AC_000051;AC_000140;ADQ31698;AF363578;AK000064;AK090702;AK298617;AK308632;AL707882;AP003550;AU137773;AV649881;AW505309;BAH12829;BC010960;BI821321;BX648079;CAA48903;CAA48903.1;CH471060;CR609104;CR625778;EAW91859;EAW91860;EU832346;EU832431;HQ447211;J05682;NC_000008;NM_001695;NP_001686;NT_008046;NW_001839136;NW_92…	P21283	ATP6V1C1	ATPase, H+ transporting, lysosomal 42kDa, V1 subunit C1	vacuolar proton-ATPase, subunit C, VI domain; vacuolar proton pump subunit C 1; V-type proton ATPase subunit C 1; H+-transporting ATPase chain C, vacuolar; H+ -ATPase C subunit; V-ATPase subunit C 1; OTTHUMP00000227403; OTTHUMP00000227406; ATPase, H+ transporting, lysosomal (vacuolar proton pump) 42kD; ATPase, H+ transporting, lysosomal 42kDa, V1 subunit C, isoform 1; OTTHUMP00000227405; OTTHUMP0…		0.1545	0.0008837
30	A_72_P043036	ATP6V1	528	AC_000051;AC_000140;NC_000008;NM_001695;NP_001686;NT_008046;NW_001839136;NW_923984	AA242944;AAA36803;AAA36803.1;AAH10960;AAH10960.1;AAL50383;AAL50383.1;ACE86916;ACE87603;AC_000051;AC_000140;ADQ31698;AF363578;AK000064;AK090702;AK298617;AK308632;AL707882;AP003550;AU137773;AV649881;AW505309;BAH12829;BC010960;BI821321;BX648079;CAA48903;CAA48903.1;CH471060;CR609104;CR625778;EAW91859;EAW91860;EU832346;EU832431;HQ447211;J05682;NC_000008;NM_001695;NP_001686;NT_008046;NW_001839136;NW_92…	P21283	ATP6V1C1	ATPase, H+ transporting, lysosomal 42kDa, V1 subunit C1	vacuolar proton-ATPase, subunit C, VI domain; vacuolar proton pump subunit C 1; V-type proton ATPase subunit C 1; H+-transporting ATPase chain C, vacuolar; H+ -ATPase C subunit; V-ATPase subunit C 1; OTTHUMP00000227403; OTTHUMP00000227406; ATPase, H+ transporting, lysosomal (vacuolar proton pump) 42kD; ATPase, H+ transporting, lysosomal 42kDa, V1 subunit C, isoform 1; OTTHUMP00000227405; OTTHUMP0…		0.1545	0.0008837
31	A_72_P043036	ATP6V1C	528	AC_000051;AC_000140;NC_000008;NM_001695;NP_001686;NT_008046;NW_001839136;NW_923984	AA242944;AAA36803;AAA36803.1;AAH10960;AAH10960.1;AAL50383;AAL50383.1;ACE86916;ACE87603;AC_000051;AC_000140;ADQ31698;AF363578;AK000064;AK090702;AK298617;AK308632;AL707882;AP003550;AU137773;AV649881;AW505309;BAH12829;BC010960;BI821321;BX648079;CAA48903;CAA48903.1;CH471060;CR609104;CR625778;EAW91859;EAW91860;EU832346;EU832431;HQ447211;J05682;NC_000008;NM_001695;NP_001686;NT_008046;NW_001839136;NW_92…	P21283	ATP6V1C1	ATPase, H+ transporting, lysosomal 42kDa, V1 subunit C1	vacuolar proton-ATPase, subunit C, VI domain; vacuolar proton pump subunit C 1; V-type proton ATPase subunit C 1; H+-transporting ATPase chain C, vacuolar; H+ -ATPase C subunit; V-ATPase subunit C 1; OTTHUMP00000227403; OTTHUMP00000227406; ATPase, H+ transporting, lysosomal (vacuolar proton pump) 42kD; ATPase, H+ transporting, lysosomal 42kDa, V1 subunit C, isoform 1; OTTHUMP00000227405; OTTHUMP0…		0.1545	0.0008837
32	A_72_P043036	ATP6V1C1	528	AC_000051;AC_000140;NC_000008;NM_001695;NP_001686;NT_008046;NW_001839136;NW_923984	AA242944;AAA36803;AAA36803.1;AAH10960;AAH10960.1;AAL50383;AAL50383.1;ACE86916;ACE87603;AC_000051;AC_000140;ADQ31698;AF363578;AK000064;AK090702;AK298617;AK308632;AL707882;AP003550;AU137773;AV649881;AW505309;BAH12829;BC010960;BI821321;BX648079;CAA48903;CAA48903.1;CH471060;CR609104;CR625778;EAW91859;EAW91860;EU832346;EU832431;HQ447211;J05682;NC_000008;NM_001695;NP_001686;NT_008046;NW_001839136;NW_92…	P21283	ATP6V1C1	ATPase, H+ transporting, lysosomal 42kDa, V1 subunit C1	vacuolar proton-ATPase, subunit C, VI domain; vacuolar proton pump subunit C 1; V-type proton ATPase subunit C 1; H+-transporting ATPase chain C, vacuolar; H+ -ATPase C subunit; V-ATPase subunit C 1; OTTHUMP00000227403; OTTHUMP00000227406; ATPase, H+ transporting, lysosomal (vacuolar proton pump) 42kD; ATPase, H+ transporting, lysosomal 42kDa, V1 subunit C, isoform 1; OTTHUMP00000227405; OTTHUMP0…	V-type proton ATPase subunit C 1	0.1545	0.0008837
33	A_72_P328498	Actr8	93973	AC_000046;AC_000135;NC_000003;NM_022899;NP_075050;NT_022517;NW_001838877;NW_921651	AAH32744;AAH32744.1;AC012467;AC_000046;AC_000135;AK022996;AK026232;AK094507;BAB14352;BAB14352.1;BAB15402;BAB15402.1;BAG52879;BAG52879.1;BC032744;BU070174;BX354684;CH471055;DA453867;EAW65300;NC_000003;NM_022899;NP_075050;NT_022517;NW_001838877;NW_921651;Q9H981	B3KSW7;Q8N566;Q9H663;Q9H981	ACTR8	ARP8 actin-related protein 8 homolog (yeast)	OTTHUMP00000212735; OTTHUMP00000213228; ARP8 (actin-related protein 8, yeast) homolog; actin-related protein 8; INO80 complex subunit N	Actin-related protein 8	-0.5054	0.003385
34	A_72_P383933	Alix	10015	AC_000046;AC_000135;NC_000003;NM_001162429;NM_013374;NP_001155901;NP_037506;NR_027867;NR_027868;NT_022517;NW_001838877;NW_921651	AAF08220;AAF08220.1;AAH20066;AAH20066.1;AAH68454;AAK20398;AAK20398.1;AAP36031;AAP36031.1;AAQ14260;AB037796;AC112220;AC123901;ACS12984;AC_000046;AC_000135;AF151793;AF250394;AF349951;AI346371;AK002122;AK295042;AK298727;BAA92092;BAA92092.1;BAA92613;BAA92613.1;BAG58093;BAH12857;BC020066;BC068454;BI562417;BM669193;BQ024882;BQ895877;BT007367;BU165197;BU194828;CH471055;DA652213;EAW64468;EAW64469;GQ13180…	Q8WUM4;Q9BX86;Q9NUN0;Q9P2H2;Q9UKL5	PDCD6IP	programmed cell death 6 interacting protein	programmed cell death 6-interacting protein; PDCD6-interacting protein; OTTHUMP00000161316; dopamine receptor interacting protein 4; ALG-2 interacting protein 1; ALG-2 interacting protein X; apoptosis-linked gene 2-interacting protein X; ALG-2-interacting protein 1	Programmed cell death 6-interacting protein	0.3736	0.001971
35	A_72_P161631	Annexin VII	310	AC_000053;AC_000142;NC_000010;NM_001156;NM_004034;NP_001147;NP_004025;NT_030059;NW_001837987;NW_924796	AAA36616;AAA36616.1;AAH02632;AAH02632.1;AAP35851;AAP35851.1;AB062429;AC_000053;AC_000142;AK222552;AK295319;AK300086;AK301681;AK307772;AK309141;AK312447;AK313024;AL353731;AL512656;AW518993;BAB93492;BAB93492.1;BAD96272;BAG35354;BAG35859;BAG58296;BAG61889;BAG63154;BC001322;BC002632;BT007187;CAG28614;CAG28614.1;CAI15290;CAI15290.1;CAI15291;CAI15291.1;CAI52483;CAI52483.1;CAI52484;CAI52484.1;CAI52485;C…	P20073;Q5F2H3;Q5T0M6;Q5T0M7	ANXA7	annexin A7	annexin VII; annexin-7; OTTHUMP00000019813; OTTHUMP00000019812	Annexin A7	-0.3261	0.006719
36	A_72_P133021	Aph2	84287	AC_000053;AC_000142;NC_000010;NM_032327;NM_198043;NM_198044;NM_198045;NM_198046;NP_115703;NP_932160;NP_932161;NP_932162;NP_932163;NT_030059;NW_001838005;NW_924884	AAG23766;AAG23766.1;AAH04535;AAH04535.1;AAH08074;AAH08074.1;AAH11749;AAH11749.1;AAH12830;AAH12830.1;AAH33157;AAH33157.1;AAQ89439;AAQ89439.1;AC_000053;AC_000142;ADQ32335;AF258563;AJ294945;AK074427;AK297962;AL355490;AY359080;BAG60274;BC004535;BC008074;BC011749;BC012830;BC033157;BC050652;BU500243;CAC82556;CAC82556.1;CAI40783;CAI40784;CAI40785;CAI40785.1;CAI40786;CAI40786.1;CAI40787;CAI40787.1;CAI407…	D3DR52;D3DR53;D3DR54;Q5JTG7;Q5JTH0;Q8N4Z6;Q8WY84;Q969W1;Q9BSV3	ZDHHC16	zinc finger, DHHC-type containing 16	zinc finger DHHC domain-containing protein 16; DHHC-16; OTTHUMP00000020195; OTTHUMP00000020200; OTTHUMP00000020199; OTTHUMP00000020194; OTTHUMP00000020191; OTTHUMP00000020192; OTTHUMP00000020193; OTTHUMP00000020197; zinc finger, DHHC domain containing 16; Abl-philin 2; OTTHUMP00000020198; probable palmitoyltransferase ZDHHC16	Probable palmitoyltransferase ZDHHC16	0.2868	0.00501
37	A_72_P125731	BRAP2	8315	AC_000055;AC_000144;NC_000012;NM_006768;NP_006759;NT_009775;NW_001838063;NW_925395	AAB88538;AAB88538.1;AAC24200;AAC24200.1;AAI36699;AAI36699.1;AAI36700;AAI36700.1;AAP93638;AAP93638.1;AB208878;AC002996;AC137055;AC_000055;AC_000144;AF035620;AF035950;AK290379;AK299326;AK308279;AY332222;BAD92115;BAF83068;BAG61333;BC136698;BC136699;BU674276;CH471054;CR623955;EAW97972;EAW97972.1;NC_000012;NM_006768;NP_006759;NT_009775;NW_001838063;NW_925395;Q59H81;Q7Z569	B9EGS8;O43238;O75341;Q7Z569	BRAP	BRCA1 associated protein	renal carcinoma antigen NY-REN-63; BRCA1-associated protein; RING finger protein 52; galectin-2-binding protein; impedes mitogenic signal propagation	BRCA1-associated protein	-0.4035	0.00526
38	A_72_P121136	BRMS1L	84312	AC_000057;AC_000146;NC_000014;NM_032352;NP_115728;NT_026437;NW_001838110;NW_925539	AA836514;AAH06250;AAH06250.2;AAV83797;AAV83797.1;AC_000057;AC_000146;ADQ32328;AK096496;AK297106;AK309431;AK310359;AK315424;AL162311;AY827074;BAG37812;BAG53305;BAG59617;BC006250;BU507838;CH471078;CR595618;CR612796;EAW65867;HQ447844;NC_000014;NM_032352;NP_115728;NT_026437;NW_001838110;NW_925539;Q5PSV4	A6NFW5;A6NH45;Q5PSV4;Q9BRI4	BRMS1L	breast cancer metastasis-suppressor 1-like	breast cancer metastasis-suppressor 1; BRMS1-homolog protein p40; BRMS1-like protein p40; breast cancer metastasis-suppressor 1-like protein	Breast cancer metastasis-suppressor 1-like protein	-0.5617	0.0002227
39	A_72_P035751	Beta-catenin	1499	AC_000046;AC_000135;NC_000003;NG_013302;NM_001098209;NM_001098210;NM_001904;NP_001091679;NP_001091680;NP_001895;NT_022517;NW_001838877;NW_921651	AAG35511.1;AAH58926;AAH58926.1;AAL89457;AAL89457.1;AAR18817;AAR18817.1;AB062292;AB451264;AB451392;ABZ92383;AC104307;AC_000046;AC_000135;AF130085;AK095242;AK289932;AK294778;AK296790;AK299954;AK314776;AY081165;AY463360;BAB93475;BAB93475.1;BAF82621;BAF82621.1;BAG57905;BAG59368;BAG61781;BAG70078;BAG70206;BC058926;BX648430;CAA61107;CAA61107.1;CAA79497;CAA79497.1;CH471055;CR596976;CR604301;DA216720;EAW…	A8K1L7;P35222;Q8NEW9;Q8NI94;Q9H391	CTNNB1	catenin (cadherin-associated protein), beta 1, 88kDa	OTTHUMP00000165223; catenin beta-1; OTTHUMP00000209289; catenin (cadherin-associated protein), beta 1 (88kD); OTTHUMP00000165222; OTTHUMP00000209288; OTTHUMP00000162082	Catenin beta-1	-0.3109	0.00702
40	A_72_P392404	Bid	637	AC_000065;AC_000154;NC_000022;NM_001196;NM_197966;NM_197967;NP_001187;NP_932070;NP_932071;NT_011519;NW_001838735;NW_927406	AAC34365;AAC34365.1;AAF89091;AAF89091.1;AAH09197;AAH09197.1;AAH22072;AAH22072.2;AAH33634;AAH33634.1;AAH36364;AAH36364.2;AAO32633;AAO32633.1;AAP50259;AAP50259.1;AAP97190;AAP97190.1;AAQ15216;ABZ92041;AC006285;AC016026;ACA61804;ACD47106;ACD47107;ACD47108;AC_000065;AC_000154;AF042083;AF087891;AF250233;AF370380;AK094795;AK313729;AY005151;AY309922;BAF79673;BAG36471;BAG52933;BC009197;BC022072;BC033634;B…	P55957;Q549M7;Q71T04;Q7Z4M9;Q8IY86	BID	BH3 interacting domain death agonist	BID isoform Si6; BID isoform L(2); BH3-interacting domain death agonist; p22 BID; Human BID coding sequence; OTTHUMP00000196194; OTTHUMP00000196195; apoptic death agonist; desmocollin type 4; BID isoform ES(1b); OTTHUMP00000196197	BH3-interacting domain death agonist	0.5038	0.0006675
41	A_72_P415913	C12orf24	29902	AC_000055;AC_000144;NC_000012;NM_013300;NP_037432;NT_009775;NW_001838062;NW_925395	AAB50215;AAB50215.1;AAH20967;AAH20967.1;ABM82726;ABM85910;AC002350;AC_000055;AC_000144;AK225731;AK296280;AK297684;AK308802;AK309603;AU129789;BAG58989;BAG60044;BC020967;BF114636;CAG33282;CAG33282.1;CH471054;CR457001;CR595487;CR602160;CR622888;CR622941;CR623239;CR623722;DQ891800;DQ894984;EAW97915;EAW97916;EAW97917;EAW97917.1;NC_000012;NM_013300;NP_037432;NT_009775;NW_001838062;NW_925395;Q8WUB2;U792…	A6NH30;Q8WUB2;Q99776	C12orf24	chromosome 12 open reading frame 24	hypothetical protein LOC29902; protein predicted by clone 23733	Uncharacterized protein C12orf24	0.3042	0.001569
42	A_72_P028401	C15orf40	123207	AC_000058;AC_000147;NC_000015;NM_001160113;NM_001160114;NM_001160115;NM_001160116;NM_144597;NP_001153585;NP_001153586;NP_001153587;NP_001153588;NP_653198;NR_027649;NR_027650;NT_077661;NW_001838221;NW_925918	AA905778;AAH19820;AAH19820.1;AC022558;AC_000058;AC_000147;AI239480;AJ705316;AK125586;AK311484;AK312160;AL602775;AW105048;BAG35094;BAG35094.1;BC019820;BE906569;BQ013375;BQ185982;BY800475;CH471188;CN347153;CR614786;DC428269;DW416709;EAW62431;EAW62432;NC_000015;NM_001160113;NM_001160114;NM_001160115;NM_001160116;NM_144597;NP_001153585;NP_001153586;NP_001153587;NP_001153588;NP_653198;NR_027649;NR_027…	A6NIC9;B2R5E7;Q8WUR7	C15orf40	chromosome 15 open reading frame 40	hypothetical protein LOC123207; OTTHUMP00000218276	UPF0235 protein C15orf40	0.3817	0.004155
43	A_72_P075656	C1orf26	54823	AC_000044;AC_000133;NC_000001;NM_001105518;NM_017673;NP_001098988;NP_060143;NT_004487;NW_001838533;NW_926128	AAG60612;AAG60612.1;AAH30781;AAH30781.1;AC_000044;AC_000133;AF288392;AK000128;AK093263;AK127980;AK225238;AK291443;AK315802;AL136133;AL356273;BAA90960;BAA90960.1;BAF84132;BAG52678;BAG54611;BC030781;BI756018;CAI17939;CAI17940;CAI17940.1;CAI22095;CAI22095.1;CH471067;DB453411;DB518900;EAW91191;NC_000001;NM_001105518;NM_017673;NP_001098988;NP_060143;NT_004487;NW_001838533;NW_926128;Q5T5J6;Q5TC96	Q5T5J6;Q8NEK9;Q9BZQ7;Q9NXQ0	SWT1	SWT1 RNA endoribonuclease homolog (S. cerevisiae)	chromosome 1 open reading frame 26; OTTHUMP00000033402; OTTHUMP00000033403; transcriptional protein SWT1	Transcriptional protein SWT1	-0.3438	0.004891
44	A_72_P236172	C21orf59	56683	AC_000064;AC_000153;NC_000021;NM_021254;NP_067077;NR_036552;NT_011512;NW_001838706;NW_927384	AAG00496;AAG00496.1;AAH00709;AAH00709.1;AC_000064;AC_000153;ADQ31713;AF282851;AK000474;AK055328;AK094456;AK097566;AK098577;AK223318;AK225697;AK300970;AP000275;BAA91189;BAB70903;BAC04359;BAD97038;BAG62593;BC000709;CH471079;CR591188;CR591409;CR591794;CR607241;CR616421;CR625119;DQ655907;DQ655908;DQ656039;EAX09865;EAX09866;EAX09867;EAX09868;HQ447226;NC_000021;NM_021254;NP_067077;NR_036552;NT_011512;N…	P57076	C21orf59	chromosome 21 open reading frame 59	OTTHUMP00000174371; chromosome 21 open reading frame 48; OTTHUMP00000067401; OTTHUMP00000067400; hypothetical protein LOC56683; OTTHUMP00000107731	Uncharacterized protein C21orf59	0.4726	0.001227
45	A_72_P312818	C6orf211	79624	AC_000049;AC_000138;NC_000006;NM_024573;NP_078849;NT_025741;NW_001838990;NW_923184	AAH11348;AAH11348.1;AC_000049;AC_000138;AJ420548;AK022972;AK298490;AK310840;AL110241;AL590543;BAB14339;BAB14339.1;BAG60698;BC011348;CAB53692;CAB53692.2;CAI10942;CAI10942.1;CH471051;CR610148;EAW47744;EAW47745;NC_000006;NM_024573;NP_078849;NT_025741;NW_001838990;NW_923184;Q9H993	Q96FC6;Q9H993;Q9UFY5	C6orf211	chromosome 6 open reading frame 211	hypothetical protein LOC79624; OTTHUMP00000017433	UPF0364 protein C6orf211	-0.5695	0.0009556
46	A_72_P305554	CAML	819	AC_000048;AC_000137;NC_000005;NM_001745;NP_001736;NT_034772;NW_001838952;NW_922784	AAA59420;AAA59420.1;AAC23596;AAC23596.1;AAI30326;AC010301;AC_000048;AC_000137;ADR82926;AF068179;AK313156;BAG35974;BC063532;BC130325;BG720084;BX111055;CH471062;CR590907;CR593088;CR596597;CR610994;CR616724;DA727548;EAW62243;EAW62244;HQ258172;NC_000005;NM_001745;NP_001736;NT_034772;NW_001838952;NW_922784;P49069;U18242	P49069	CAMLG	calcium modulating ligand	calcium signal-modulating cyclophilin ligand; cyclophilin B-binding protein; OTTHUMP00000159378; calcium-signal modulating cyclophilin ligand; calcium-modulating cyclophilin ligand; OTTHUMP00000223128	Calcium signal-modulating cyclophilin ligand	-0.5999	0.001171
47	A_72_P355733	CCDC125	202243	AC_000048;AC_000137;NC_000005;NM_176816;NP_789786;NT_006713;NW_001838935;NW_003315917;NW_922618	AAI13750;AAI60002;AB024691;AB024692;AC145132;AC145145;AC_000048;AC_000137;AI141520;AK299871;AL832658;BAC57450;BAC57450.1;BAC57451;BAC57451.1;BAG61723;BC108715;BC113749;BC160002;BQ923745;CH471137;EAW51298;EAW51299;NC_000005;NM_176816;NP_789786;NT_006713;NW_001838935;NW_003315917;NW_922618;Q2HJ12;Q86Z20	Q86Z19;Q86Z20	CCDC125	coiled-coil domain containing 125	OTTHUMP00000192869; coiled-coil domain-containing protein 125; OTTHUMP00000222129; Kenae; OTTHUMP00000161932	Coiled-coil domain-containing protein 125	0.875	7.98e-05
48	A_72_P361003	CCDC55	84081	AC_000060;AC_000149;NC_000017;NM_032141;NP_115517;NT_010799;NW_001838430;NW_926750	AAF28918;AAH16313;AAH40118;AAH40118.1;AAI05045;AAI05045.1;AAI05047;AAI05047.1;AAI43540;AC104984;AC_000060;AC_000149;AF161358;AK094552;AK297102;AK313963;AL136806;AM392705;AM392719;BAG36679;BAH12497;BC016313;BC040118;BC046116;BC062425;BC105044;BC105046;BC143417;BC143539;CAB66740;CAB66740.1;CAG38586;CAG38586.1;CAL37583;CAL37597;CB957325;CH471159;CR533555;EAW51220;EAW51221;EAW51222;NC_000017;NM_03214…	Q6FI71;Q9H0G5	NSRP1	nuclear speckle splicing regulatory protein 1	coiled-coil domain containing 55; coiled-coil domain-containing protein 55; OTTHUMP00000163639	Coiled-coil domain-containing protein 55	0.7199	0.0006952
49	A_72_P186806	CD45	5788	AC_000044;AC_000133;NC_000001;NG_007730;NM_002838;NM_080921;NM_080923;NP_002829;NP_563578;NP_563580;NT_004487;NW_001838533;NW_003315907;NW_926128	AAA59497;AAD15273;AAD15273.2;AAG26082;AAH14239;AAH17863;AAI21087;AAI21088;AAI27657;AAI27658;AAI48258;AAM12758;AAS46922;AAS46930;AAS46938;AAS46946;AAS46954;AAS46962;AAS75254;AC_000044;AC_000133;AF492459;AK130573;AK292131;AK299986;AK303539;AK307635;AK308217;AK310898;AL157402;AL355988;AY429565;AY539659;AY539667;AY539675;AY539683;AY539691;AY539699;AY567999;BAF84820;BAF84820.1;BAG61807;BAG64565;BC0142…	A8K7W6;P08575;Q16614;Q9H0Y6	PTPRC	protein tyrosine phosphatase, receptor type, C	CD45 antigen; OTTHUMP00000033816; receptor-type tyrosine-protein phosphatase C; leukocyte-common antigen; OTTHUMP00000033817; OTTHUMP00000038574; OTTHUMP00000033813; protein tyrosine phosphatase, receptor type, c polypeptide; T200 leukocyte common antigen; leukocyte common antigen; T200 glycoprotein	Receptor-type tyrosine-protein phosphatase C	-0.4537	0.001687
50	A_72_P184481	CDC5L	988	AC_000049;AC_000138;NC_000006;NM_001253;NP_001244;NT_007592;NW_001838981;NW_923073	AAB61210;AAB61210.1;AAH01568;AAH01568.1;AAR89913;AAR89913.1;AB007892;ABM82549;ABM85740;AC_000049;AC_000138;AK128737;AK299738;AL133262;AL353588;AY518540;BAA20885;BAA20885.1;BAA24862;BAA24862.2;BAG54722;BAG61633;BC001568;BG187521;BG497404;CAI20149;CAI20149.1;CAI40750;CAI40750.1;CH471081;CR594844;D85423;DQ891623;DQ894814;EAX04270;NC_000006;NM_001253;NP_001244;NT_007592;NW_001838981;NW_923073;Q99459;…	Q76N46;Q99459;Q99974	CDC5L	CDC5 cell division cycle 5-like (S. pombe)	cell division cycle 5-like protein; dJ319D22.1 (CDC5-like protein); Cdc5-related protein; CDC5 (cell division cycle 5, S. pombe, homolog)-like; pombe cdc5-related protein; OTTHUMP00000016529	Cell division cycle 5-like protein	-0.4651	0.0005478
51	A_72_P357668	CENP-I (FSHPRH1)	2491	AC_000066;AC_000155;NC_000023;NG_012510;NM_006733;NP_006724;NT_011651;NW_001842387;NW_927715	AAH12462;AAH12462.1;AC_000066;AC_000155;AK302986;AL109963;BAG64126;BC005967;BC012462;BG114761;BQ224168;CAA65884;CAA65884.1;CAB72340;CAB72340.1;CAI42266;CAI42267;CAI42268;CAI42268.1;CH471115;EAX02840;EAX02841;EAX02842;EAX02843;M78295;NC_000023;NG_012510;NM_006733;NP_006724;NT_011651;NW_001842387;NW_927715;Q5JX01;Q5JX02;Q92674;X97249	Q5JWZ9;Q92674;Q96ED0	CENPI	centromere protein I	interphase centromere complex protein 19; OTTHUMP00000023668; FSH primary response protein 1; follicle-stimulating hormone primary response protein; FSH primary response (LRPR1, rat) homolog 1; FSH primary response (LRPR1 homolog, rat) 1; leucine-rich primary response protein 1; FSH primary response 1; OTTHUMP00000023671	Centromere protein I	-0.3581	0.0008736
52	A_72_P319348	CGI-48	51096	AC_000060;AC_000149;NC_000017;NM_016001;NP_057085;NT_010783;NW_001838448;NW_926894	AAD34043;AAD34043.1;AAG01999;AAG01999.1;AAH25276;AAH25276.2;AC006141;AC_000060;AC_000149;AF151806;AK026355;AK314399;AY007138;BAG37023;BC001535;BC025276;BG723023;BM548967;CH471109;CR618262;EAW94559;NC_000017;NM_016001;NP_057085;NT_010783;NW_001838448;NW_926894;Q9Y5J1	Q9H4N6;Q9Y5J1	UTP18	UTP18, small subunit (SSU) processome component, homolog (yeast)	U3 small nucleolar RNA-associated protein 18 homolog; WD repeat-containing protein 50; OTTHUMP00000221917; WD repeat domain 50	U3 small nucleolar RNA-associated protein 18 homolog	-0.2742	0.008463
53	A_72_P049886	CGNL1	84952	AC_000058;AC_000147;NC_000015;NM_032866;NP_116255;NT_010194;NW_001838218;NW_925884	AAH30995;AAH30995.1;AAH62770;AAH93827;AAH93827.1;AAI12050;AAI12050.1;AAI18919;AAI18919.1;AAP42073;AAP42073.1;AAT37906;AAT37906.1;AB051536;AC016525;AC025271;AC_000058;AC_000147;AK027025;AK027863;AK056673;AK307410;AL110171;AY274808;AY610514;BAB21840;BAB21840.2;BAB55415;BAB55415.1;BAB71249;BAB71249.1;BC021799;BC030995;BC062770;BC093827;BC112049;BC118918;BC118919;BQ023767;CH471082;EAW77521;EAW77521.1…	Q05BZ4;Q0VF96;Q52LR0;Q695C7;Q7Z2L3;Q96JV2;Q96MN6;Q9C0B4	CGNL1	cingulin-like 1	cingulin-like protein 1; paracingulin; OTTHUMP00000163190; junction-associated coiled-coil protein	Cingulin-like protein 1	1.385	0.005241
54	A_72_P130736	CHD6	84181	AC_000063;AC_000152;NC_000020;NM_032221;NP_115597;NT_011362;NW_001838666;NW_927339	AAH21907;AAH21907.1;AAI72397;AAK56405;AAK56405.1;AAN59903;AAN59903.1;AB037756;AC_000063;AC_000152;AF525085;AK026022;AK091551;AK098144;AK296955;AL031667;AL031669;AL121674;AY034072;BAA92573;BAA92573.2;BAB15325;BAB15325.1;BAG59500;BC012516;BC021907;BC039860;BC040016;BC172397;BF063641;CAI21743;CAI21743.1;CAI21744;CAI21744.1;CAI21745;CAI21745.1;CAI22254;CAI22254.1;CAI22255;CAI22255.1;CAI22256;CAI22256…	Q5JYQ0;Q5TGZ9;Q5TH00;Q5TH01;Q8IZR2;Q8TD26;Q8WTY0;Q9H4H6;Q9H6D4;Q9NTT7;Q9P2L1	CHD6	chromodomain helicase DNA binding protein 6	CHD-6; radiation-induced gene B protein; chromodomain-helicase-DNA-binding protein 6; helicase C-terminal domain- and SNF2 N-terminal domain-containing protein; OTTHUMP00000031013; ATP-dependent helicase CHD6	Chromodomain-helicase-DNA-binding protein 6	0.5225	0.003505
55	A_72_P126081	CLK2	1196	AC_000044;AC_000133;NC_000001;NM_003993;NP_003984;NT_004487;NW_001838531;NW_003315906;NW_925683	AAA61481;AAA61481.1;AAA61482;AAA61482.1;AAC51817;AAC51817.1;AAH06274;AAH14067;AAH14067.1;AAH53603;AAH53603.1;AC_000044;AC_000133;AF023268;AK091036;AK291995;AK303696;AL713999;AU136826;BAF84684;BAG52265;BAH14022;BC006274;BC014067;BC053603;BI562223;CAI95097;CAI95098;CAI95098.1;CAI95099;CH471121;CR623321;EAW53087;EAW53088;EAW53089;L29216;L29218;NC_000001;NM_003993;NP_003984;NT_004487;NW_001838531;NW_…	B1AVS9;B5MBX6;P49760;Q96CQ0	CLK2	CDC-like kinase 2	dual specificity protein kinase CLK2; OTTHUMP00000034065; OTTHUMP00000034064; OTTHUMP00000034063; CLK kinase	Dual specificity protein kinase CLK2	0.3406	0.002847
56	A_72_P184961	COG complex	22796	AC_000044;AC_000133;NC_000001;NM_001145036;NM_007357;NP_001138508;NP_031383;NT_167186;NW_001838549;NW_927128	AAH14960;AAH14960.1;AAH51906;ABM83170;ABM86371;ABW03786;AC_000044;AC_000133;AK295251;AK302288;AK302791;AK312678;AL158214;AL832190;BAG35559;BAH12018;BAH13668;BAH13805;BC014960;BC051906;CAA84427;CAA84427.1;CAI15358;CAI15359;CD366946;CH471098;CR625249;DB449302;DC349417;DQ892244;DQ895445;EAW69915;EAW69916;EU176335;NC_000001;NM_001145036;NM_007357;NP_001138508;NP_031383;NT_167186;NW_001838549;NW_92712…	Q14746	COG2	component of oligomeric golgi complex 2	COG complex subunit 2; OTTHUMP00000035875; low density lipoprotein receptor defect C complementing; OTTHUMP00000035876; conserved oligomeric Golgi complex subunit 2; conserved oligomeric Golgi complex protein 2; brefeldin A-sensitive, peripheral Golgi protein; low density lipoprotein receptor defect C-complementing protein		-0.4008	0.004821
57	A_72_P184961	COG2	22796	AC_000044;AC_000133;NC_000001;NM_001145036;NM_007357;NP_001138508;NP_031383;NT_167186;NW_001838549;NW_927128	AAH14960;AAH14960.1;AAH51906;ABM83170;ABM86371;ABW03786;AC_000044;AC_000133;AK295251;AK302288;AK302791;AK312678;AL158214;AL832190;BAG35559;BAH12018;BAH13668;BAH13805;BC014960;BC051906;CAA84427;CAA84427.1;CAI15358;CAI15359;CD366946;CH471098;CR625249;DB449302;DC349417;DQ892244;DQ895445;EAW69915;EAW69916;EU176335;NC_000001;NM_001145036;NM_007357;NP_001138508;NP_031383;NT_167186;NW_001838549;NW_92712…	Q14746	COG2	component of oligomeric golgi complex 2	COG complex subunit 2; OTTHUMP00000035875; low density lipoprotein receptor defect C complementing; OTTHUMP00000035876; conserved oligomeric Golgi complex subunit 2; conserved oligomeric Golgi complex protein 2; brefeldin A-sensitive, peripheral Golgi protein; low density lipoprotein receptor defect C-complementing protein	Conserved oligomeric Golgi complex subunit 2	-0.4008	0.004821
58	A_72_P218187	COIL	8161	AC_000060;AC_000149;NC_000017;NM_004645;NP_004636;NT_010783;NW_001838448;NW_926894	AAA36412;AAA36412.1;AAB81550;AAB81550.1;AAH10385;AAH10385.1;ABM83853;ABM87175;AC004584;AC_000060;AC_000149;AK313616;AW021880;BAG36378;BAG36378.1;BC010385;CH471109;CR594693;CR605137;CR610327;CR611341;DQ892927;DQ896176;EAW94522;EAW94522.1;M58411;NC_000017;NM_004645;NP_004636;NT_010783;NW_001838448;NW_926894;P38432;U06632	B2R931;P38432	COIL	coilin	p80; coilin p80	Coilin	1.294	0.003072
59	A_72_P202642	COMMD1 (MURR1)	150684	AC_000045;AC_000134;NC_000002;NM_152516;NP_689729;NT_022184;NW_001838769;NW_927719	AAH09266;AAH09266.2;AAH22046;AAH22046.1;AAX93080;AAY24054;AAY24141;AB178811;AC018462;AC107081;AC116652;AC_000045;AC_000134;ADQ32226;AK223607;AK294203;BAD18972;BAD18972.1;BAD97327;BAG57515;BC009266;BC022046;BG182961;BG183486;BG215225;CH471053;D85433;EAW99981;HQ447741;NC_000002;NM_152516;NP_689729;NT_022184;NW_001838769;NW_927719;Q53EN2;Q53Q75;Q53QP8;Q53SJ8;Q8N668	Q8N668;Q96GS0	COMMD1	copper metabolism (Murr1) domain containing 1	copper metabolism gene MURR1; protein Murr1; COMM domain-containing protein 1; chromosome 2 open reading frame 5 (MURR1); OTTHUMP00000159817	COMM domain-containing protein 1	0.195	0.009663
60	A_72_P202872	COMMD4	54939	AC_000058;AC_000147;NC_000015;NM_017828;NP_060298;NT_010194;NW_001838219;NW_925907	AAH00837;AAH00837.2;AAH68998;AAH68998.1;AAS22242;AAS22242.1;AC068338;AC_000058;AC_000147;AK000459;AK057145;AK225716;AK293708;AK314740;AL136872;AY542160;BAA91178;BAA91178.1;BAG37281;BAG37281.1;BAG57141;BC000837;BC033744;BC040944;BC068998;BC069195;BI829484;CAB66806;CAB66806.1;CAG38483;CAG38483.1;CH471136;CR533452;CR599145;CR603489;CR618150;CR618327;EAW99261;EAW99262;EAW99263;EAW99263.1;NC_000015;NM…	B2RBN4;Q7L637;Q9H0A8;Q9NX43	COMMD4	COMM domain containing 4	OTTHUMP00000233101; OTTHUMP00000183484; COMM domain-containing protein 4	COMM domain-containing protein 4	0.3479	0.009417
61	A_72_P039136	COP9 signalosome	8533	AC_000060;AC_000149;NC_000017;NM_001199125;NM_003653;NP_001186054;NP_003644;NT_010718;NW_001838410;NW_926628	AAC14197;AAC14197.1;AAD41247;AAD41247.1;AAH01891;AAH01891.1;AC055811;AC_000060;AC_000149;ADQ31729;AF031647;AF098109;AK297706;AK302304;AK312476;AK316400;BAG35380;BAG35380.1;BAG60063;BAG63643;BAH14771;BC001891;BP260214;BQ018146;BU952436;CH471196;CR590945;CR594817;CR595552;CR597915;CR599192;CR600698;CR602972;CR608585;CR611420;CR613300;CR616766;CR617410;CR618089;CR619826;CR622277;EAW55711;EAW55712;EA…	B2R683;O43191;Q7LDR6;Q9UNS2	COPS3	COP9 constitutive photomorphogenic homolog subunit 3 (Arabidopsis)	signalosome subunit 3; COP9 signalosome complex subunit 3; COP9 complex subunit 3; COP9 (constitutive photomorphogenic, Arabidopsis, homolog) subunit 3; OTTHUMP00000065517; JAB1-containing signalosome subunit 3		0.1948	0.009677
62	A_72_P039136	COPS3	8533	AC_000060;AC_000149;NC_000017;NM_001199125;NM_003653;NP_001186054;NP_003644;NT_010718;NW_001838410;NW_926628	AAC14197;AAC14197.1;AAD41247;AAD41247.1;AAH01891;AAH01891.1;AC055811;AC_000060;AC_000149;ADQ31729;AF031647;AF098109;AK297706;AK302304;AK312476;AK316400;BAG35380;BAG35380.1;BAG60063;BAG63643;BAH14771;BC001891;BP260214;BQ018146;BU952436;CH471196;CR590945;CR594817;CR595552;CR597915;CR599192;CR600698;CR602972;CR608585;CR611420;CR613300;CR616766;CR617410;CR618089;CR619826;CR622277;EAW55711;EAW55712;EA…	B2R683;O43191;Q7LDR6;Q9UNS2	COPS3	COP9 constitutive photomorphogenic homolog subunit 3 (Arabidopsis)	signalosome subunit 3; COP9 signalosome complex subunit 3; COP9 complex subunit 3; COP9 (constitutive photomorphogenic, Arabidopsis, homolog) subunit 3; OTTHUMP00000065517; JAB1-containing signalosome subunit 3	COP9 signalosome complex subunit 3	0.1948	0.009677
63	A_72_P362073	COQ4	51117	AC_000052;AC_000141;NC_000009;NM_016035;NP_057119;NT_008470;NW_001839239;NW_924573	AAD34087;AAD34087.1;AAH11895;AAH11895.1;ABW91141;ABW91141.1;ABW91142;ABW91142.1;ABW91143;ABW91143.1;ABW91144;ABW91144.1;ABW91145;ABW91145.1;AC_000052;AC_000141;AF151850;AK025376;AK126646;AK301333;AK313650;AL359091;AM392657;BAG36405;BAG36405.1;BAG62881;BC011895;BC036603;CAI13486;CAI13487;CAI13487.1;CAL37535;CBN61894;CH471090;CR594347;CR601285;CR602433;CR607746;CR616941;CX787359;EAW87774;EAW87775;E…	A8WBK8;B2R958;Q5T4B8;Q96EW4;Q9Y3A0	COQ4	coenzyme Q4 homolog (S. cerevisiae)	coenzyme Q biosynthesis protein 4 homolog; ubiquinone biosynthesis protein COQ4 homolog, mitochondrial; coenzyme Q4 homolog (yeast); OTTHUMP00000022262	Ubiquinone biosynthesis protein COQ4 homolog, mitochondrial	0.308	0.0004985
64	A_72_P280804	CREAM1	9569	AC_000050;AC_000068;AC_000139;NC_000007;NG_027954;NM_001199207;NM_005685;NM_016328;NP_001186136;NP_005676;NP_057412;NT_007933;NT_079593;NW_001839039;NW_923450	AAD14687;AAD14687.2;AAD27668;AAD27668.1;AAF17358;AAF17358.1;AAF19786;AAF19786.1;AAF21796;AAF21796.1;AAH18136;AAH18136.1;AAP21877;AAP21877.1;AAS00361;AAS00362;AAS00362.1;AAT68469;AB209389;ABM82097;ABM85280;AC004851;AC005015;AC005231;AC_000050;AC_000068;AC_000139;AF089107;AF104923;AF118270;AF151354;AF156489;AK308242;AY648295;BAD92626;BC018136;CH471200;CR594398;CR622355;DQ891171;DQ894354;EAW69599;EA…	O95444;Q75MX7;Q86UM3;Q8WVC4;Q9UHK8;Q9UHL9;Q9UI91	GTF2IRD1	GTF2I repeat domain containing 1	GTF2I repeat domain-containing 1; williams-Beuren syndrome chromosomal region 12 protein; slow-muscle-fiber enhancer-binding protein; general transcription factor III; general transcription factor 3; OTTHUMP00000213172; USE B1-binding protein; muscle TFII-I repeat domain-containing protein 1 alpha 1; OTTHUMP00000213173; OTTHUMP00000213171; binding factor for early enhancer; Williams-Beuren syndro…	General transcription factor II-I repeat domain-containing protein 1	-0.3544	0.003467
65	A_72_P198687	CTDSPL	10217	AC_000046;AC_000135;NC_000003;NM_001008392;NM_005808;NP_001008393;NP_005799;NT_022517;NW_001838877;NW_921651	AAI66643;AAP34400;AAP34400.1;AAQ76797;AAQ76797.1;AC093415;AC105752;AC_000046;AC_000135;AI143812;AI192993;AJ575644;AJ575645;AY279532;AY364238;BAA21667;BAA21667.1;BC166643;CAE11804;CAE11804.1;CAE11805;CAE11805.1;CH471055;CR611541;D88153;EAW64502;EAW64503;EAW64504;EAW64505;NC_000003;NM_001008392;NM_005808;NP_001008393;NP_005799;NT_022517;NW_001838877;NW_921651;O15194	O15194;Q3ZTU0;Q70KI4;Q7Z5Q2	CTDSPL	CTD (carboxy-terminal domain, RNA polymerase II, polypeptide A) small phosphatase-like	small CTD phosphatase 3; CTD small phosphatase-like protein; CTDSP-like; NLI-interacting factor 1; carboxy-terminal domain RNA polymerase II polypeptide A small phosphatase 3; nuclear LIM interactor-interacting factor 1; NIF-like protein; chromosome 3 open reading frame 8; small C-terminal domain phosphatase 3; OTTHUMP00000208948; OTTHUMP00000208947; RB protein serine phosphatase from chromosome 3	CTD small phosphatase-like protein	0.4151	0.0007387
66	A_72_P355338	CYB	4519	NC_012920;YP_003024038	AAA19775.1;AAA31851.1;AAB58955;AAB58955.3;AAK17219.1;AAK17232.2;AAK17245.2;AAK17258.1;AAK17271.2;AAK17284.2;AAK17297.2;AAK17310.2;AAK17323.2;AAK17336.2;AAK17349.2;AAK17362.2;AAK17375.2;AAK17388.1;AAK17401.1;AAK17414.1;AAK17427.1;AAK17440.2;AAK17453.2;AAK17466.1;AAK17479.1;AAK17492.2;AAK17505.2;AAK17518.2;AAK17531.2;AAK17544.1;AAK17557.2;AAK17570.1;AAK17583.2;AAK17596.2;AAK17609.2;AAK17622.2;AAK17…	P00156;Q34786;Q8HBR6;Q8HNQ0;Q8HNQ1;Q8HNQ9;Q8HNR4;Q8HNR7;Q8W7V8;Q8WCV9;Q8WCY2;Q8WCY7;Q8WCY8;Q9B1A6;Q9B1B6;Q9B1B8;Q9B1D4;Q9B1X6;Q9B2V0;Q9B2V8;Q9B2W0;Q9B2W3;Q9B2W8;Q9B2X1;Q9B2X7;Q9B2X9;Q9B2Y3;Q9B2Z0;Q9B2Z4;Q9T6H6;Q9T9Y0;Q9TEH4	CYTB	mitochondrially encoded cytochrome b	cytochrome b	Cytochrome b	-0.3485	0.004918
67	A_72_P088422	CYP24A1	1591	AC_000063;AC_000152;NC_000020;NG_008334;NM_000782;NM_001128915;NP_000773;NP_001122387;NT_011362;NW_001838666;NW_927339	AAA62379;AAA62379.1;AAB03776;AAB03776.1;AAB29308;AAB29308.1;AAI09084;AAI09085;AAW50795;AC_000063;AC_000152;AI400154;AL138805;AW022349;AY858838;BC109083;BC109084;BI491491;BM928702;BU662901;CAB91829;CAB91829.1;CH471077;CN311231;EAW75573;L13286;N29030;NC_000020;NG_008334;NM_000782;NM_001128915;NP_000773;NP_001122387;NT_011362;NW_001838666;NW_927339;Q07973;Q32ML3;Q5I2W7;S67623;U60669	Q07973;Q15807	CYP24A1	cytochrome P450, family 24, subfamily A, polypeptide 1	cytochrome P450, subfamily XXIV (vitamin D 24-hydroxylase); vitamin D(3) 24-hydroxylase; cytochrome P450 24A1; cytochrome P450-CC24; 1,25-@dihydroxyvitamin D3 24-hydroxylase; OTTHUMP00000165939; exo-mitochondrial protein; OTTHUMP00000031314; OTTHUMP00000165940; vitamin D 24-hydroxylase; 24-OHase; 1,25-dihydroxyvitamin D(3) 24-hydroxylase, mitochondrial	1,25-dihydroxyvitamin D(3) 24-hydroxylase, mitochondrial	-0.4427	0.001468
68	A_72_P088326	Calpain 3	825	AC_000058;AC_000147;NC_000015;NG_008660;NM_000070;NM_024344;NM_173087;NM_173088;NM_173089;NM_173090;NM_212465;NP_000061;NP_077320;NP_775110;NP_775111;NP_775112;NP_775113;NP_997630;NR_027911;NR_027912;NT_010194;NW_001838214;NW_925840	AAD28253;AAD28253.1;AAD28254;AAD28254.3;AAH03169;AAH03169.1;AAH03521;AAH04883;AAH07810;AAH67126;AAI00783;AAI00784;AAI00785;AAI07792;AAI28606;AAI46650;AAI46650.1;AAI46673;AAI46673.1;AAL40183;AAL40183.1;AAP35986;AAP35986.1;AAW69391;AAW69391.1;AC012651;ACE86752;ACE87440;ACI63187;ACI63188;AC_000058;AC_000147;AF127764;AF127765;AF147441;AF209502;AK027249;AK293792;AK308103;AY902237;BAG57205;BC003169;BC0…	A6H8K6;P20807;Q9BTU4;Q9Y5S6;Q9Y5S7	CAPN3	calpain 3, (p94)	calpain p94, large [catalytic] subunit; OTTHUMP00000161195; new calpain 1; calpain L3; calpain-3; calcium-activated neutral proteinase 3; OTTHUMP00000161194; calpain, large polypeptide L3; OTTHUMP00000161196; muscle-specific calcium-activated neutral protease 3 large subunit	Calpain-3	-0.3033	0.002949
69	A_72_P128321	Calreticulin	811	AC_000062;AC_000151;NC_000019;NM_004343;NP_004334;NT_011295;NW_001838483;NW_927195	AAA36582;AAA36582.1;AAA51916;AAA51916.1;AAB51176;AAB51176.1;AAH02500;AAH02500.1;AAH07911;AAH07911.1;AAH20493;AAH20493.1;AAL13126;AAL13126.1;AAP36116;AAP36116.1;AB451408;AC092069;AC_000062;AC_000151;AD000092;AF087986;AK130190;AK223060;AK295230;AK304492;AY047586;BAD96780;BAG58223;BAG65301;BAG70222;BAG70222.1;BC002500;BC007911;BC020493;BC107102;BT007448;CAG33351;CAG33351.1;CAK18761;CH471106;CR457070…	P27797;Q6IAT4;Q9UDG2	CALR	calreticulin	grp60; calregulin; endoplasmic reticulum resident protein 60; CRP55; autoantigen Ro; Sicca syndrome antigen A (autoantigen Ro; calreticulin); HACBP; ERp60	Calreticulin	-0.262	0.009184
70	A_72_P432274	Centromere protein S	378708	NM_199294;NP_954988;NR_036462	AAH29430;AAH29430.1;AAM61954.1;AAM70482.1;ADQ32275;AF516753;AF521016;AL139424;AL354956;BC029430;BE858209;BG213105;BG546364;BM905996;BU902753;CA311915;CAI19199;CAI19199.1;CAI19200.1;CAI19201.1;CAI95755;CAI95755.1;CAI95756.1;CAI95757.1;CH471130;CR593315;CR593499;EAW71654;HQ447791;NM_199294;NP_954988;NR_036462;Q8N2Z9	Q8N2Z9;Q8NFE5;Q8NFG5	APITD1	apoptosis-inducing, TAF9-like domain 1	Fanconi anemia-associated polypeptide of 16 kDa; apoptosis-inducing TAF9-like domain-containing protein 1; FANCM-interacting histone fold protein 1; OTTHUMP00000222023; OTTHUMP00000065120; centromere protein S; OTTHUMP00000065118	Centromere protein S	0.4501	0.004832
71	A_72_P029731	Chk1	1111	AC_000054;AC_000143;NC_000011;NM_001114121;NM_001114122;NM_001274;NP_001107593;NP_001107594;NP_001265;NT_033899;NW_001838043;NW_925173	AAB88852;AAB88852.1;AAC51736;AAC51736.1;AAH04202;AAH04202.1;AAH17575;AAH17575.1;AAM78553;AAM78553.1;AAQ76038;AB032387;AB451222;AB451345;ABM83833;ABM87141;AC_000054;AC_000143;AF016582;AF032874;AF527555;AK292549;AK293143;AK299783;AK300082;AP001132;AY304548;BAA84577;BAA84577.1;BAF85238;BAF85238.1;BAG56691;BAG61665;BAG61885;BAG70036;BAG70159;BC004202;BC017575;BG191840;BG216281;BG218896;BP207812;CH471…	A8K934;O14757	CHEK1	CHK1 checkpoint homolog (S. pombe)	OTTHUMP00000231301; serine/threonine-protein kinase Chk1; Checkpoint, S. pombe, homolog of, 1; CHK1 (checkpoint, S.pombe) homolog; OTTHUMP00000231309; OTTHUMP00000231300; OTTHUMP00000231307; OTTHUMP00000231306	Serine/threonine-protein kinase Chk1	0.5022	0.003529
72	A_72_P281719	Clathrin	1213	AC_000060;AC_000149;NC_000017;NM_004859;NP_004850;NT_010783;NW_001838449;NW_926894	AAH36430;AAH51800;AAH51800.1;AAH54489;AAH54489.1;AB073891;AC091271;AC_000060;AC_000149;AK127134;BAA04801;BAA04801.2;BC015854;BC036430;BC051800;BC054489;BX473803;BX640615;CAA39363;CAA39363.1;CAE45761;CAE45761.1;CH471109;CR617482;CR625541;CR625967;D21260;EAW94395;EAW94396;EAW94396.1;EAW94397;EAW94398;EAW94399;EAW94399.1;NC_000017;NM_004859;NP_004850;NT_010783;NW_001838449;NW_926894;Q00610;Q49AL0;X5…	D3DU00;Q00610;Q6N0A0;Q86TF2	CLTC	clathrin, heavy chain (Hc)	clathrin heavy chain on chromosome 17; OTTHUMP00000165785; clathrin, heavy polypeptide-like 2; clathrin, heavy polypeptide (Hc); clathrin heavy chain 1; clathrin, heavy chain; OTTHUMP00000165784		-0.2711	0.005067
73	A_72_P281719	Clathrin heavy chain	1213	AC_000060;AC_000149;NC_000017;NM_004859;NP_004850;NT_010783;NW_001838449;NW_926894	AAH36430;AAH51800;AAH51800.1;AAH54489;AAH54489.1;AB073891;AC091271;AC_000060;AC_000149;AK127134;BAA04801;BAA04801.2;BC015854;BC036430;BC051800;BC054489;BX473803;BX640615;CAA39363;CAA39363.1;CAE45761;CAE45761.1;CH471109;CR617482;CR625541;CR625967;D21260;EAW94395;EAW94396;EAW94396.1;EAW94397;EAW94398;EAW94399;EAW94399.1;NC_000017;NM_004859;NP_004850;NT_010783;NW_001838449;NW_926894;Q00610;Q49AL0;X5…	D3DU00;Q00610;Q6N0A0;Q86TF2	CLTC	clathrin, heavy chain (Hc)	clathrin heavy chain on chromosome 17; OTTHUMP00000165785; clathrin, heavy polypeptide-like 2; clathrin, heavy polypeptide (Hc); clathrin heavy chain 1; clathrin, heavy chain; OTTHUMP00000165784	Clathrin heavy chain 1	-0.2711	0.005067
74	A_72_P015331	CoREST complex	10362	AC_000062;AC_000151;NC_000019;NM_006339;NP_006330;NT_011255;NW_001838476;NW_927173	AAC26860;AAC26860.1;AAC62837;AAC62837.1;AAF66707;AAF66707.1;AAF76253;AAF76253.1;AAG01174;AAG01174.1;AAG60060;AAG60060.1;AAH02552;AAH02552.1;AAH03505;AAH03505.2;AAH04408;AAH04408.2;AAH21585;AAH21585.1;AAI34414;AAL55873;ABZ92463;AC005786;AC116968;AC_000062;AC_000151;AF072165;AF072836;AF146223;AF288679;AF318366;AF331191;AK090733;AK129638;AK289500;AK310601;AK314201;AL355691;AL355702;AL355703;AL355709…	A6NMS5;D6W616;Q6IBP8;Q8NBD5;Q9HD21;Q9P0W2;Q9Y491;Q9Y4A2	HMG20B	high mobility group 20B	SWI/SNF-related matrix-associated actin-dependent regulator of chromatin subfamily E, member 1-related; HMG box domain containing 2; SWI/SNF-related matrix-associated actin-dependent regulator of chromatin subfamily E member 1-related; structural DNA-binding protein BRAF35; HMG domain-containing protein HMGX2; HMG box-containing protein 20B; BRCA2-associated factor 35; SMARCE1-related protein; OT…		0.1951	0.006397
75	A_72_P088331	Cofilin	1073	AC_000057;AC_000146;NC_000014;NG_012740;NM_021914;NM_138638;NP_068733;NP_619579;NR_028130;NR_028131;NR_028132;NT_026437;NW_001838110;NW_925539	AAD31280;AAD31280.1;AAD31281;AAD31281.1;AAF64498;AAF64498.1;AAF97934;AAF97934.1;AAH11444;AAH11444.1;AAH22364;AAH22364.1;AAH22876;AAH22876.1;AAM10495;ACE87051;ACE87733;AC_000057;AC_000146;AF087867;AF134802;AF134803;AF242299;AF283513;AI754134;AK314157;AL117457;AL355885;BAG36842;BC011444;BC022364;BC022876;BC025683;CB992605;CH471078;CR600914;CR605888;CR620328;DA298739;DA897112;DB378917;EAW65908;EAW65…	Q9Y281	CFL2	cofilin 2 (muscle)	cofilin-2; OTTHUMP00000178805; OTTHUMP00000178806; cofilin, muscle isoform		-0.6292	0.003993
76	A_72_P088331	Cofilin, muscle	1073	AC_000057;AC_000146;NC_000014;NG_012740;NM_021914;NM_138638;NP_068733;NP_619579;NR_028130;NR_028131;NR_028132;NT_026437;NW_001838110;NW_925539	AAD31280;AAD31280.1;AAD31281;AAD31281.1;AAF64498;AAF64498.1;AAF97934;AAF97934.1;AAH11444;AAH11444.1;AAH22364;AAH22364.1;AAH22876;AAH22876.1;AAM10495;ACE87051;ACE87733;AC_000057;AC_000146;AF087867;AF134802;AF134803;AF242299;AF283513;AI754134;AK314157;AL117457;AL355885;BAG36842;BC011444;BC022364;BC022876;BC025683;CB992605;CH471078;CR600914;CR605888;CR620328;DA298739;DA897112;DB378917;EAW65908;EAW65…	Q9Y281	CFL2	cofilin 2 (muscle)	cofilin-2; OTTHUMP00000178805; OTTHUMP00000178806; cofilin, muscle isoform	Cofilin-2	-0.6292	0.003993
77	A_72_P184041	Collagen Prolyl 4-Hydroxylase	5033	AC_000053;AC_000142;NC_000010;NM_000917;NM_001017962;NM_001142595;NM_001142596;NP_000908;NP_001017962;NP_001136067;NP_001136068;NT_030059;NW_001837987;NW_924796	AA780802;AAA36534;AAA36534.1;AAA36535;AAA36535.1;AAA59068;AAA59068.1;AAA59069;AAA59069.1;AAH34998;AAH34998.1;ABM82595;ABM85781;AC_000053;AC_000142;AI061083;AK222960;AK312593;AL702003;AL731563;BAD96680;BC034998;CAH72753;CAH72754;CAH72754.1;CD013929;CD013930;CH471083;CR590114;DB030709;DQ891669;DQ894855;EAW54467;EAW54468;EAW54469;EAW54470;M24486;M24487;NC_000010;NM_000917;NM_001017962;NM_001142595;N…	P13674;Q15082;Q15083;Q5VSQ5	P4HA1	prolyl 4-hydroxylase, alpha polypeptide I	C-P4Halpha(I); collagen prolyl 4-hydroxylase alpha(I); procollagen-proline,2-oxoglutarate-4-dioxygenase subunit alpha-1; prolyl 4-hydroxylase subunit alpha-1; OTTHUMP00000019794; procollagen-proline, 2-oxoglutarate 4-dioxygenase (proline 4-hydroxylase), alpha polypeptide I; OTTHUMP00000019793		-0.5121	0.005446
78	A_72_P184041	Collagen Prolyl 4-Hydroxylase	8974	AC_000048;AC_000137;NC_000005;NM_001017973;NM_001017974;NM_001142598;NM_001142599;NM_004199;NP_001017973;NP_001017974;NP_001136070;NP_001136071;NP_004190;NT_034772;NW_001838952;NW_922784	AAB71339;AAB71339.1;AAH17062;AAH35813;AAH35813.1;AAQ89329;AAQ89329.1;ABM83357;ABW03320;AC034220;AC063976;AC_000048;AC_000137;AJ314859;AU117989;AY358970;BC017062;BC025960;BC035813;BI758477;BX647924;CAC85688;CAC85688.1;CAC85689;CAC85689.1;CAI46066;CH471062;DA544450;DQ892431;EAW62341;EAW62341.1;EAW62342;EAW62342.1;EAW62343;EAW62343.1;EAW62344;EAW62345;EAW62346;EAW62346.1;EAW62347;EAW62348;EU176519;N…	D3DQ85;D3DQ86;O15460;Q8WWN0	P4HA2	prolyl 4-hydroxylase, alpha polypeptide II	C-P4Halpha(II); collagen prolyl 4-hydroxylase alpha(II); OTTHUMP00000065966; procollagen-proline,2-oxoglutarate-4-dioxygenase subunit alpha-2; 4-PH alpha-2; prolyl 4-hydroxylase subunit alpha-2; procollagen-proline, 2-oxoglutarate 4-dioxygenase (proline 4-hydroxylase), alpha polypeptide II; OTTHUMP00000065969; OTTHUMP00000065967; 4-PH alpha 2; OTTHUMP00000065968		-0.5121	0.005446
79	A_72_P432274	Cortistatin	1325	AC_000044;AC_000133;NC_000001;NM_001302;NP_001293;NT_021937;NW_001838523;NW_923572	AAB66895;AAB66895.1;AAH40034;AAI19725;AAI19725.1;AAI19726;AAI19726.1;AAQ89950;AAQ89950.1;AB000263;AC_000044;AC_000133;AF013252;AF086433;AL354956;AV750349;AW205880;AY358561;BAA19770;BAA19770.1;BC040034;BC119724;BC119725;BF590359;CAI19195;CAI19195.1;CH471130;EAW71650;EAW71650.1;NC_000001;NM_001302;NP_001293;NT_021937;NW_001838523;NW_923572;O00230;Q8IUV6	O00230;Q5T6G0;Q6UX11	CORT	cortistatin	preprocortistatin; cortistatin-14; OTTHUMP00000001901; cortistatin-17; cortistatin-29	Cortistatin	0.4501	0.004832
80	A_72_P011101	CtBP	1488	AC_000053;AC_000142;NC_000010;NM_001083914;NM_001329;NM_022802;NP_001077383;NP_001320;NP_073713;NT_030059;NW_001838010;NW_924884	AAC39603;AAC39603.1;AAG45951;AAG45951.1;AAH02486;AAH02486.1;AAH37900;AAH47018;AAH47018.1;AAH52276;AAH52276.1;AAH72020;AAH72020.1;AAP35658;AAP35658.1;ABB82238;AC_000053;AC_000142;AF016507;AF222711;AK290390;AL157888;AL596261;AL731571;AL833398;BAF83079;BAF83079.1;BC002486;BC037900;BC047018;BC052276;BC072020;BQ933925;BT007012;CAH10590;CAH10590.1;CAH72472;CAH72472.1;CAI16100;CAI16100.1;CAI16101;CAI161…	A8K2X5;D3DRF5;O43449;P56545;Q5SQP7;Q69YI3;Q86SV0;Q9H2T8	CTBP2	C-terminal binding protein 2	OTTHUMP00000020700; C-terminal-binding protein 2; OTTHUMP00000020699; OTTHUMP00000235910; OTTHUMP00000235908; OTTHUMP00000235909; OTTHUMP00000020701; ribeye		0.4493	0.00734
81	A_72_P011101	CtBP2	1488	AC_000053;AC_000142;NC_000010;NM_001083914;NM_001329;NM_022802;NP_001077383;NP_001320;NP_073713;NT_030059;NW_001838010;NW_924884	AAC39603;AAC39603.1;AAG45951;AAG45951.1;AAH02486;AAH02486.1;AAH37900;AAH47018;AAH47018.1;AAH52276;AAH52276.1;AAH72020;AAH72020.1;AAP35658;AAP35658.1;ABB82238;AC_000053;AC_000142;AF016507;AF222711;AK290390;AL157888;AL596261;AL731571;AL833398;BAF83079;BAF83079.1;BC002486;BC037900;BC047018;BC052276;BC072020;BQ933925;BT007012;CAH10590;CAH10590.1;CAH72472;CAH72472.1;CAI16100;CAI16100.1;CAI16101;CAI161…	A8K2X5;D3DRF5;O43449;P56545;Q5SQP7;Q69YI3;Q86SV0;Q9H2T8	CTBP2	C-terminal binding protein 2	OTTHUMP00000020700; C-terminal-binding protein 2; OTTHUMP00000020699; OTTHUMP00000235910; OTTHUMP00000235908; OTTHUMP00000235909; OTTHUMP00000020701; ribeye	C-terminal-binding protein 2	0.4493	0.00734
82	A_72_P200012	Cul4/DDB1/Rbx1 E3 ligase	8450	AC_000066;AC_000155;NC_000023;NG_009388;NM_001079872;NM_003588;NP_001073341;NP_003579;NT_011786;NW_001842396;NW_927721	AAB67315;AAB67315.1;AAC50548;AAC50548.1;AAH36216;AAH36216.1;AAK16812;AAK16812.1;AAR13073;AAR13073.1;AB014595;ABM85676;AC002476;AC_000066;AC_000155;AF212995;AK123688;AK299081;AK315037;AL451005;AY365125;BAA31670;BAA31670.2;BAG37520;BAG37520.1;BAG53936;BAG53936.1;BAH12944;BAH12944.1;BC036216;BX537641;BX537787;BX647096;CAD97843;CAD97843.1;CAI41370;CAI41370.1;CH471107;CR603224;CR936722;CV573599;DB0927…	B1APK5;B3KVX4;B7Z5K8;Q13620;Q6PIE4;Q6UP07;Q7Z673;Q9BY37;Q9UEB7;Q9UED7	CUL4B	cullin 4B	CUL-4B; cullin-4B; OTTHUMP00000023946; OTTHUMP00000023947; OTTHUMP00000023948		-0.3369	0.00257
83	A_72_P200012	Cullin 4	8450	AC_000066;AC_000155;NC_000023;NG_009388;NM_001079872;NM_003588;NP_001073341;NP_003579;NT_011786;NW_001842396;NW_927721	AAB67315;AAB67315.1;AAC50548;AAC50548.1;AAH36216;AAH36216.1;AAK16812;AAK16812.1;AAR13073;AAR13073.1;AB014595;ABM85676;AC002476;AC_000066;AC_000155;AF212995;AK123688;AK299081;AK315037;AL451005;AY365125;BAA31670;BAA31670.2;BAG37520;BAG37520.1;BAG53936;BAG53936.1;BAH12944;BAH12944.1;BC036216;BX537641;BX537787;BX647096;CAD97843;CAD97843.1;CAI41370;CAI41370.1;CH471107;CR603224;CR936722;CV573599;DB0927…	B1APK5;B3KVX4;B7Z5K8;Q13620;Q6PIE4;Q6UP07;Q7Z673;Q9BY37;Q9UEB7;Q9UED7	CUL4B	cullin 4B	CUL-4B; cullin-4B; OTTHUMP00000023946; OTTHUMP00000023947; OTTHUMP00000023948		-0.3369	0.00257
84	A_72_P200012	Cullin 4B	8450	AC_000066;AC_000155;NC_000023;NG_009388;NM_001079872;NM_003588;NP_001073341;NP_003579;NT_011786;NW_001842396;NW_927721	AAB67315;AAB67315.1;AAC50548;AAC50548.1;AAH36216;AAH36216.1;AAK16812;AAK16812.1;AAR13073;AAR13073.1;AB014595;ABM85676;AC002476;AC_000066;AC_000155;AF212995;AK123688;AK299081;AK315037;AL451005;AY365125;BAA31670;BAA31670.2;BAG37520;BAG37520.1;BAG53936;BAG53936.1;BAH12944;BAH12944.1;BC036216;BX537641;BX537787;BX647096;CAD97843;CAD97843.1;CAI41370;CAI41370.1;CH471107;CR603224;CR936722;CV573599;DB0927…	B1APK5;B3KVX4;B7Z5K8;Q13620;Q6PIE4;Q6UP07;Q7Z673;Q9BY37;Q9UEB7;Q9UED7	CUL4B	cullin 4B	CUL-4B; cullin-4B; OTTHUMP00000023946; OTTHUMP00000023947; OTTHUMP00000023948	Cullin-4B	-0.3369	0.00257
85	A_72_P226102	DAZAP	9802	AC_000055;AC_000144;NC_000012;NM_001136264;NM_001136266;NM_001136267;NM_001136268;NM_001136269;NM_014764;NP_001129736;NP_001129738;NP_001129739;NP_001129740;NP_001129741;NP_055579;NT_029419;NW_001838057;NW_925351	AAH02334;AAH02334.1;AAH07900;AAH07900.1;AAR11454;AAR11454.1;AC046135;AC139768;AC_000055;AC_000144;ADQ31699;AK095963;AK125855;AK290119;AK293330;AK303828;AY430097;BAA06545;BAA06545.2;BAF82808;BAF82808.1;BAG56846;BAG64775;BC002334;BC007900;BM982980;BU662353;BX647278;CD697667;CH471111;CR590843;CR594491;CR595995;CR598969;CR599409;CR602531;CR607711;CR609119;CR612770;CR614908;D31767;DA900264;DC303613;DC…	A8K254;Q15038	DAZAP2	DAZ associated protein 2	deleted in azoospermia associated protein 2; proline-rich transcript, brain-expressed protein; proline-rich transcript in brain; deleted in azoospermia-associated protein 2; DAZ-associated protein 2		-0.2829	0.002301
86	A_72_P226102	DAZAP2	9802	AC_000055;AC_000144;NC_000012;NM_001136264;NM_001136266;NM_001136267;NM_001136268;NM_001136269;NM_014764;NP_001129736;NP_001129738;NP_001129739;NP_001129740;NP_001129741;NP_055579;NT_029419;NW_001838057;NW_925351	AAH02334;AAH02334.1;AAH07900;AAH07900.1;AAR11454;AAR11454.1;AC046135;AC139768;AC_000055;AC_000144;ADQ31699;AK095963;AK125855;AK290119;AK293330;AK303828;AY430097;BAA06545;BAA06545.2;BAF82808;BAF82808.1;BAG56846;BAG64775;BC002334;BC007900;BM982980;BU662353;BX647278;CD697667;CH471111;CR590843;CR594491;CR595995;CR598969;CR599409;CR602531;CR607711;CR609119;CR612770;CR614908;D31767;DA900264;DC303613;DC…	A8K254;Q15038	DAZAP2	DAZ associated protein 2	deleted in azoospermia associated protein 2; proline-rich transcript, brain-expressed protein; proline-rich transcript in brain; deleted in azoospermia-associated protein 2; DAZ-associated protein 2	DAZ-associated protein 2	-0.2829	0.002301
87	A_72_P223747	DNA dC->dU-editing enzyme APOBEC-3H	164668	AC_000065;AC_000154;NC_000022;NM_001166002;NM_001166003;NM_001166004;NM_181773;NP_001159474;NP_001159475;NP_001159476;NP_861438;NT_011520;NW_001838745;NW_927628	AAH69023;AAH69023.1;ACK77772;ACK77773;ACK77774;ACK77775;ACK77776;ACK77777;ACK77778;AC_000065;AC_000154;AL031846;BC069023;BQ052182;BQ054330;BU585251;CAG30367;CAG30367.3;CAQ07272;CAQ07272.1;CAQ07273;CAQ07273.1;CH471095;CR456481;EAW60294;EAW60295;EAW60296;FJ376611;FJ376612;FJ376613;FJ376614;FJ376615;FJ376616;FJ376617;NC_000022;NM_001166002;NM_001166003;NM_001166004;NM_181773;NP_001159474;NP_00115947…	B0QYP0;B0QYP1;Q5JYL9;Q6IC87;Q6NTF7	APOBEC3H	apolipoprotein B mRNA editing enzyme, catalytic polypeptide-like 3H	ARP-10; APOBEC-related protein 10; DNA dC->dU-editing enzyme APOBEC-3H; apolipoprotein B mRNA-editing enzyme catalytic polypeptide-like 3H; OTTHUMP00000199086; OTTHUMP00000199085	DNA dC->dU-editing enzyme APOBEC-3H	-0.4044	0.006795
88	A_72_P299589	DNAJB12	54788	AC_000053;AC_000142;NC_000010;NM_001002762;NM_017626;NP_001002762;NP_060096;NT_030059;NW_001837987;NW_924796;NW_927656	AAH11812;AAH11812.2;AAH64920;AAH64920.1;AC091769;AC_000053;AC_000142;ADQ32612;AK000034;AK025942;AK027259;AK225051;AK302071;AL050381;AL833358;BAA90896;BAA90896.1;BAB15289;BAB15289.1;BAH13619;BAH13619.1;BC011812;BC064920;BI520000;BQ935010;CAH56413;CH471083;CR597632;CR606618;DC397260;EAW54454;EAW54455;EAW54456;HQ448131;NC_000010;NM_001002762;NM_017626;NP_001002762;NP_060096;NT_030059;NW_001837987;NW…	B7Z7I3;Q9H6H0;Q9NXW2	DNAJB12	DnaJ (Hsp40) homolog, subfamily B, member 12	dnaJ homolog subfamily B member 12; OTTHUMP00000019786	DnaJ homolog subfamily B member 12	0.5146	0.008304
89	A_72_P193402	DPP8	54878	AC_000058;AC_000147;NC_000015;NM_017743;NM_130434;NM_197960;NM_197961;NP_060213;NP_569118;NP_932064;NP_932065;NT_010194;NW_001838218;NW_925884	AAG29766;AAG29766.1;AAG29767;AAG29767.1;AAG29768;AAG29768.1;AAG29769;AAG29769.1;AAH30688;AAH30688.3;AAO17261;AAO17261.1;AAQ13623.1;AAQ13650.1;AAQ13657;AAQ13657.1;AAQ63887;AAQ63887.1;ABM82659;ABM85836;AC011846;AC105129;AC_000058;AC_000147;AF173382;AF175225;AF176779;AF221634;AF221635;AF221636;AF221637;AK000290;AK027826;AK291057;AK296915;AK302638;AY172659;AY354202;BAA91059;BAA91059.1;BAB55395;BAB553…	Q6V1X1;Q7Z4C8;Q7Z4D3;Q7Z4E1;Q8IWG7;Q8NEM5;Q96JX1;Q9HBM2;Q9HBM3;Q9HBM4;Q9HBM5;Q9NXF4	DPP8	dipeptidyl-peptidase 8	OTTHUMP00000164197; dipeptidyl peptidase IV-related protein-1; OTTHUMP00000164200; dipeptidyl peptidase IV-related protein 1; DPP VIII; DPRP-1; dipeptidylpeptidase 8; prolyl dipeptidase DPP8; OTTHUMP00000164198; OTTHUMP00000164199; dipeptidyl peptidase 8; dipeptidyl peptidase VIII	Dipeptidyl peptidase 8	0.5016	0.004679
90	A_72_P133451;A_72_P357833	Dymeclin	54808	AC_000061;AC_000150;NC_000018;NG_009239;NM_017653;NP_060123;NT_010966;NW_001838468;NW_927106	AAH01252;AAH01252.2;AAH64394;AAH64394.1;AAQ76809;AAQ76809.1;ABL59903;AC016866;AC044840;AC090329;AC100778;AC_000061;AC_000150;AK000078;AK074611;AK091256;AK225205;AK291303;AK296579;AK315091;AL390156;AY364250;BAA90931;BAC11088;BAC11088.1;BAF83992;BAF83992.1;BAG37556;BAG37556.1;BAG52319;BAG52319.1;BAG59199;BAG59199.1;BC001252;BC064394;BK000950;BQ021755;CAB99092;CAB99092.1;CH471096;DAA00396;DAA00396.1…	A8K5I8;B2RCF9;B4DKI7;Q3ZTS8;Q6P2P5;Q7RTS9;Q8N2M0;Q9BVE9;Q9NPU7	DYM	dymeclin	dyggve-Melchior-Clausen syndrome protein; OTTHUMP00000163493	Dymeclin	0.4051	0.002544
91	A_72_P091851	ENP1	953	AC_000053;AC_000142;NC_000010;NM_001098175;NM_001164178;NM_001164179;NM_001164181;NM_001164182;NM_001164183;NM_001776;NP_001091645;NP_001157650;NP_001157651;NP_001157653;NP_001157654;NP_001157655;NP_001767;NT_030059;NW_001838005;NW_924884	AAB32152;AAB32152.1;AAB47572;AAB47572.1;AAH47664;AC_000053;AC_000142;AJ133133;AJ133134;AK098240;AK098278;AK298648;AK301459;AK304018;AK304836;AK316009;AL356632;AL365273;AL547722;AL833543;BAG62981;BAG64933;BAG64933.1;BAG65580;BAH12835;BAH14380;BC047664;BF839210;BX537522;CAB41886;CAB41886.1;CAB41887;CAB41887.1;CAH73752;CAH73752.1;CAH73753;CAH73753.1;CAH73754;CAH73754.1;CAI16770;CAI16770.1;CAI16771;C…	A9Z1X8;B4E1X1;P49961;Q5T561;Q5T562;Q9UQQ9;Q9Y3Q9	ENTPD1	ectonucleoside triphosphate diphosphohydrolase 1	ecto-ATPase 1; ecto-ATP diphosphohydrolase 1; ecto-ATPDase 1; OTTHUMP00000020161; lymphoid cell activation antigen; CD39 antigen; NTPDase 1; ecto-apyrase; OTTHUMP00000020163	Ectonucleoside triphosphate diphosphohydrolase 1	-0.5174	0.003802
92	A_72_P033246;A_72_P159261	EPS15R	58513	AC_000062;AC_000151;NC_000019;NM_021235;NP_067058;NT_011295;NW_001838484;NW_927195	AAF21930;AAF21930.1;AAI31591;AAI42663;AAI42717;AB015346;AC008764;AC020917;AC_000062;AC_000151;AF110265;AK023744;AK024166;AK025770;AK291359;AK296473;AK297428;AK299001;AL110270;BAA88118;BAA88118.1;BAF84048;BAG51266;BAG59115;BAG59856;BAG61087;BC037558;BC051873;BC067114;BC131590;BC142662;BC142716;CAH10724;CH471106;EAW84542;EAW84543;EAW84544;EAW84545;NC_000019;NM_021235;NP_067058;NT_011295;NW_00183848…	Q9UBC2	EPS15L1	epidermal growth factor receptor pathway substrate 15-like 1	eps15-related protein; epidermal growth factor receptor substrate 15-like 1; epidermal growth factor receptor substrate EPS15R	Epidermal growth factor receptor substrate 15-like 1	-0.269	0.0007036
93	A_72_P365033	EXOD1	112479	AC_000059;AC_000148;NC_000016;NM_001142725;NM_080663;NP_001136197;NP_542394;NT_010393;NW_001838381;NW_926184	A8K979;AAC31669;AAC31669.1;AAH10503;AAH10503.1;AB040937;ABM85927;ABM85928;AC004381;AC_000059;AC_000148;AK127391;AK292594;AK304347;BAA96028;BAA96028.1;BAC86956;BAC86956.1;BAF85283;BAF85283.1;BAG65191;BC010503;BX437401;CH471228;DQ895001;DQ895002;EAW66836;EAW66837;NC_000016;NM_001142725;NM_080663;NP_001136197;NP_542394;NT_010393;NW_001838381;NW_926184	A8K979;Q6ZSJ2;Q96FR9;Q9P224;Q9Y6V3	ERI2	ERI1 exoribonuclease family member 2	ERI1 exoribonuclease 2; enhanced RNAi three prime mRNA exonuclease homolog 2; exoribonuclease 2; exonuclease domain-containing protein 1; exonuclease domain containing 1; OTTHUMP00000162295	ERI1 exoribonuclease 2	0.2348	0.007031
94	A_72_P058206	FALZ	2186	AC_000060;AC_000149;NC_000017;NM_004459;NM_182641;NP_004450;NP_872579;NT_010783;NW_001838454;NW_925844;NW_926918	AAA97522;AAA97522.1;AAH50566;AAH67234;AAH67234.1;AAP22284;AAP22284.1;AB032251;AC006534;AC107377;AC134407;AC_000060;AC_000149;AK022081;AK022570;AK025776;AK027184;AK293224;AK296256;AK297281;AL833375;AY282495;BAA89208;BAA89208.1;BAB15686;BAG56763;BAG58970;BAG59752;BC037422;BC039881;BC050566;BC067234;BE464864;BQ716216;BU169920;BU176205;CF135401;CH471099;CV809604;EAW89038;EAW89039;NC_000017;NM_004459;…	Q12830;Q6NX67;Q7Z7D6;Q9UIG2	BPTF	bromodomain PHD finger transcription factor	fetal Alz-50 reactive clone 1; fetal Alz-50 clone 1 protein; fetal Alzheimer antigen; bromodomain and PHD domain transcription factor; nucleosome-remodeling factor subunit BPTF; OTTHUMP00000163085; OTTHUMP00000163084; nucleosome remodeling factor, large subunit; bromodomain and PHD finger-containing transcription factor	Nucleosome-remodeling factor subunit BPTF	0.439	0.0004048
95	A_72_P344233	FAM39A	653440	NC_000023;NC_000024;NG_008380;NT_167198;NT_167206	ABX71499;ABX71509;AJ271736;BC029274;CAB96818;CAB96818.1;CR595583;EU240546;EU240556;NC_000023;NC_000024;NG_008380;NT_167198;NT_167206	A6NGF1;Q8N305;Q9NQA3	WASH6P	WAS protein family homolog 6 pseudogene	family with sequence similarity 39, member A; chromosomes X and Y open reading frame 1	WAS protein family homolog 6	0.6185	0.001286
96	A_72_P401923	FAM49B	51571	AC_000051;AC_000140;NC_000008;NM_016623;NP_057707;NT_008046;NW_001839136;NW_923984	AAF64265;AAF64265.1;AAH03599;AAH03599.1;AAH16345;AAH16345.1;AAH17297;AAH17297.1;AAQ76818;AAT06731;AAT06731.1;AC022973;AC_000051;AC_000140;ADQ33146;AF208851;AK001226;AK002059;AK130372;AY364259;AY598320;BAA91566;BAA92062;BAA92062.1;BC003599;BC016345;BC017297;CAH18422;CH471060;CR594067;CR597917;CR616846;CR749628;EAW92125;EAW92126;EAW92127;EAW92128;HQ448668;NC_000008;NM_016623;NP_057707;NT_008046;NW_…	Q96AZ5;Q9NUQ9;Q9NZE7	FAM49B	family with sequence similarity 49, member B	OTTHUMP00000227567; OTTHUMP00000227565; OTTHUMP00000227564; hypothetical protein LOC51571; OTTHUMP00000227566; OTTHUMP00000227571; OTTHUMP00000227569; OTTHUMP00000227563; OTTHUMP00000227568; OTTHUMP00000227570	Protein FAM49B	-0.5186	0.007214
97	A_72_P066791	FBX6	26270	AC_000044;AC_000133;NC_000001;NM_018438;NP_060908;NT_021937;NW_001838534;NW_923572	AAF04470;AAF04470.1;AAF67153;AAF67153.1;AAH20880;AAH20880.1;AC_000044;AC_000133;ADQ32156;AF129536;AF233223;AK314989;AL031731;BAG37485;BAG37485.1;BC020880;CAI20214;CAI20214.1;CAI20215;CAI20215.1;CH471130;EAW71696;EAW71696.1;HQ447671;NC_000001;NM_018438;NP_060908;NT_021937;NW_001838534;NW_923572;Q9NRD1	B1AK42;B2RC88;Q9NRD1;Q9UKT3	FBXO6	F-box protein 6	F-box protein FBG2; F-box protein that recognizes sugar chains 2; F-box only protein 6; F-box/G-domain protein 2; OTTHUMP00000002268; F-box protein Fbx6; OTTHUMP00000002267	F-box only protein 6	0.6275	0.0003017
98	A_72_P202732	FLJ20625	55004	AC_000054;AC_000143;NC_000011;NG_021423;NM_017907;NP_060377;NT_167190;NW_001838028;NW_925106	AAH01706;AAH01706.1;AAL55767;AAL55767.1;AC_000054;AC_000143;AF289583;AK000632;AK300681;AP000812;BAA91297;BAA91297.1;BAG62364;BC001706;BX381569;CAG33528;CAG33528.1;CH471076;CR457247;CR593078;CR595901;CR597246;CR601471;CR609270;CR609345;CR610683;CR610955;CR613122;CR615692;CR619743;CR623336;CR624050;CR626401;EAW74836;EAW74837;NC_000011;NG_021423;NM_017907;NP_060377;NT_167190;NW_001838028;NW_925106;Q…	Q6IAA8;Q8WZ09;Q9NWT0	LAMTOR1	late endosomal/lysosomal adaptor, MAPK and MTOR activator 1	OTTHUMP00000237131; OTTHUMP00000237132; p27kip1 releasing factor from RhoA; chromosome 11 open reading frame 59; RhoA activator C11orf59; lipid raft adaptor protein p18; ragulator complex protein PDRO; late endosomal/lysosomal adaptor and MAPK and MTOR activator 1; protein associated with DRMs and endosomes; ragulator complex protein LAMTOR1; OTTHUMP00000237128; p27Kip1-releasing factor from RhoA	Ragulator complex protein LAMTOR1	0.2263	0.003073
99	A_72_P039081	Factor D	1675	AC_000062;AC_000151;NC_000019;NG_007274;NM_001928;NP_001919;NT_011255;NW_001838476;NW_927173	AAA35527;AAA35527.1;AAH34529;AAH34529.1;AAH40146;AAH40146.1;AAH51001;AAH51001.1;AAH57807;AAH57807.1;ABI63376;AC112706;AC_000062;AC_000151;AJ313463;AK300963;BAG62588;BAG62588.1;BC034529;BC040146;BC051001;BC057807;BG573629;BI763909;CAC48304;CAC48304.1;CAG38812;CH471139;CR536575;DQ884409;EAW69588;EAW69588.1;M84526;NC_000019;NG_007274;NM_001928;NP_001919;NT_011255;NW_001838476;NW_927173;P00746;Q6FHW3	B4DV76;P00746;Q5U5S1;Q86VJ5;Q8N4E0;Q8WZB4	CFD	complement factor D (adipsin)	properdin factor D; complement factor D; C3 convertase activator; complement factor D preproprotein; D component of complement (adipsin)	Complement factor D	0.3659	0.006058
100	A_72_P251667	Factor I	3426	AC_000047;AC_000136;NC_000004;NG_007569;NM_000204;NP_000195;NT_016354;NW_001838915;NW_922162	AAA52455;AAA52455.1;AAC08733;AAC08733.2;AAH20718;AC126283;AC_000047;AC_000136;AF005095;AK122686;AK290625;AK299232;BAF83314;BAG61264;BC005275;BC020718;BM955734;BP235907;CAA68416;CAA68416.1;CAA68417;CAA68418;CH471057;CR618232;DC392360;EAX06250;EAX06251;EAX06252;J02770;N63668;NC_000004;NG_007569;NM_000204;NP_000195;NT_016354;NW_001838915;NW_922162;P05156;Q6LAM0;Q6LAM1;Q8WW88;Y00318	O60442;P05156	CFI	complement factor I	OTTHUMP00000221928; C3B/C4B inactivator; I factor (complement); complement factor I heavy chain; C3b-inactivator; OTTHUMP00000219728; light chain of factor I; complement component I; complement control protein factor I; Konglutinogen-activating factor	Complement factor I	0.4243	0.009447
101	A_72_P146966	G-CSF	1440	AC_000060;AC_000149;NC_000017;NM_000759;NM_001178147;NM_172219;NM_172220;NP_000750;NP_001171618;NP_757373;NP_757374;NR_033662;NT_010783;NW_001838435;NW_926828	AAA03056;AAA03056.1;AAA35882;AAA35882.1;AAA66353;AAH33245;AAK62469;AAK62469.1;AB102881;AC090844;AC_000060;AC_000149;ADI49832;AF388025;AK290247;AK298116;AK313509;BAD89410;BAF82936;BAG36289;BAG60399;BC033245;CAA27168;CAA27168.1;CAA27290;CAA27290.1;CAA27291;CAA27291.1;CAG46689;CAS03439;CB127794;CD013926;CH471152;CR541891;EAW60626;EAW60627;EAW60628;FB704344;HM132049;M13008;M17706;M20922;NC_000017;NM_…	P09919	CSF3	colony stimulating factor 3 (granulocyte)	lenograstim; granulocyte colony-stimulating factor; chromosome 17 open reading frame 33; OTTHUMP00000164328; OTTHUMP00000164327; OTTHUMP00000164325; OTTHUMP00000164326; pluripoietin; filgrastim	Granulocyte colony-stimulating factor	0.6525	0.006187
102	A_72_P135431	GCNT2	2651	AC_000049;AC_000138;NC_000006;NG_007469;NM_001491;NM_145649;NM_145655;NP_001482;NP_663624;NP_663630;NT_007592;NW_001838973;NW_922984	AAA81777;AAA81777.1;AAA99832;AAA99832.1;AAH74801;AAH74801.1;AAH74802;AAH74802.1;AAI30525;AAI30525.1;AAL50561;AAL50562;AAM73864;AAM73864.1;AAM73865;AAM73865.1;AAM73866;AAM73866.1;AAM73867;AAM73869;AAM73870;AAM74524;AAR95646;AAR95646.1;AAR95647;AAR95647.1;AAR95648;AAR95648.1;AB078432;AB078433;AC_000049;AC_000138;ADR82994;AF401652;AF401653;AF458024;AF458025;AF458026;AF458027;AF458028;AF458029;AF4580…	Q06430;Q5T4J1;Q5W0E9;Q6T5E5;Q8N0V5;Q8NFS9	GCNT2	glucosaminyl (N-acetyl) transferase 2, I-branching enzyme (I blood group)	N-acetyllactosaminide beta-1,6-N-acetylglucosaminyl-transferase; N-acetylglucosaminyltransferase; Ii blood group; glucosaminyl (N-acetyl) transferase 2, I-branching enzyme (Ii blood group); cataract, congenital; glucosaminyl (N-acetyl) transferase 5; glucosaminyl (N-acetyl) transferase 2, I-branching enzyme; N-acetyllactosaminide beta-1,6-N-acetylglucosaminyltransferase; OTTHUMP00000016018; OTTHU…	N-acetyllactosaminide beta-1,6-N-acetylglucosaminyl-transferase, isoform B	-0.351	0.001731
103	A_72_P379138	GLK(MAP4K3)	8491	AC_000045;AC_000134;NC_000002;NG_028007;NM_003618;NP_003609;NT_022184;NW_001838769;NW_927719	AAC15472.1;AAF19240;AAF19240.1;AAH71579;AAH71579.1;AAN75849;AAN75849.1;AAN75850;AAN75850.1;AAY14734;AC007684;AC079615;ACE87796;ACT64392;AC_000045;AC_000134;AF000145;AF445385;AF445386;AF445387;AF445388;AF445390;AF445391;AF445392;AF445393;AF445394;AF445395;AF445396;AF445397;AF445398;AF445399;AF445400;AF445401;AF445402;AF445403;AF445404;AF445405;AF445406;AF445407;AF445408;AF445409;AF445410;AF445411;…	Q6IQ39;Q8IVH7;Q8IVH8;Q9UDM5;Q9Y6R5	MAP4K3	mitogen-activated protein kinase kinase kinase kinase 3	MEK kinase kinase 3; OTTHUMP00000204180; OTTHUMP00000204178; OTTHUMP00000128322; MAPK/ERK kinase kinase kinase 3; germinal center kinase-related protein kinase; germinal center kinase-like kinase	Mitogen-activated protein kinase kinase kinase kinase 3	-0.2384	0.00519
104	A_72_P256002	GON4L	54856	AC_000044;AC_000133;NC_000001;NM_001037533;NM_032292;NP_001032622;NP_115668;NT_004487;NW_001838531;NW_925683	AAH36740;AAH36740.2;AAH52260;AAH64933;AAH64933.1;AAH71650;AAI14630;AAI14630.1;AAI15704;AAI17558;AAR01260;AAR01260.1;AAR01261;AAR01261.1;AAR01262;AAR01262.1;AB046826;AB195687;AB195688;AB232668;AC_000044;AC_000133;AK000210;AK022985;AK026693;AK098734;AK222851;AK315191;AL136565;AL139128;AL162734;AY335490;AY335491;AY335492;BAA91011;BAB13432;BAB13432.1;BAB14347;BAB15528;BAC05397;BAD96571;BAF51556;BAF51…	B7ZBL4;Q14C93;Q3T8J8;Q3T8J9;Q5VYZ5;Q5W0D5;Q6AWA6;Q6P1Q6;Q7Z3L3;Q8IY79;Q9BQI1;Q9HCG6	GON4L	gon-4-like (C. elegans)	gon-4 homolog; 2610100B20Rik; gon-4 homolog (C.elegans); OTTHUMP00000015935; OTTHUMP00000208357; GON-4-like protein; YY1AP-related protein1; OTTHUMP00000208356	GON-4-like protein	0.68	0.006259
105	A_72_P152766	GRHPR	9380	AC_000052;AC_000141;NC_000009;NG_008135;NM_012203;NP_036335;NT_008413;NW_001839151;NW_924062	AAD45886;AAD45886.1;AAD46517;AAD46517.1;AAD54066;AAD54066.1;AAF00111;AAF00111.1;AAG39286;AAG39286.1;AAH00605;AAH00605.1;AAH88360;AC_000052;AC_000141;AF113215;AF113251;AF134895;AF146018;AF146689;AK024386;AK025978;AK026287;AK026752;AK307325;AK307902;AK315690;AL158155;AM393403;AM393629;BAB15430;BAG38053;BC000605;BC003131;BC088360;CAI13847;CAI13848;CAL38281;CAL38505;CH471071;CR590962;CR591687;CR59220…	Q9H3E9;Q9UBQ7;Q9UKX1	GRHPR	glyoxylate reductase/hydroxypyruvate reductase	glycerate-2-dehydrogenase; OTTHUMP00000021380; OTTHUMP00000021379	Glyoxylate reductase/hydroxypyruvate reductase	0.2407	0.006382
106	A_72_P029906	GRK4	2868	AC_000047;AC_000136;NC_000004;NG_029102;NM_001004056;NM_001004057;NM_182982;NP_001004056;NP_001004057;NP_892027;NT_006051;NW_001838896;NW_921918	AAB04045;AAB04045.1;AAC50406;AAC50406.1;AAC50407;AAC50407.1;AAC50408;AAC50408.1;AAC50409;AAC50409.1;AAC50410;AAC50410.1;AAC50411;AAC50411.1;AAC50412;AAC50412.1;AAI17321;AAI17321.1;AC_000047;AC_000136;ADR83217;AK223581;AK292390;AL390065;BAD97301;BAD97301.1;BAF85079;BC027597;BC117320;BI465220;BM725978;CAA53506;CAA53506.1;CAA66468;CAA66468.1;CAA66469;CAA66469.1;CAA66470;CAA66470.1;CAA66802;CAA66802.…	O00641;O00642;P32298;Q13293;Q13294;Q13295;Q14453;Q14725;Q15313;Q15314;Q15315;Q15316;Q17RH6;Q53EQ8	GRK4	G protein-coupled receptor kinase 4	OTTHUMP00000216992; ITI1; OTTHUMP00000216993; G protein-coupled receptor kinase 2-like (Drosophila); OTTHUMP00000221010; OTTHUMP00000216995	G protein-coupled receptor kinase 4	0.7155	0.001861
107	A_72_P213567	Galpha(q)-specific nucleotide-like GPCRs	5031	AC_000054;AC_000143;NC_000011;NM_004154;NM_176796;NM_176797;NM_176798;NP_004145;NP_789766;NP_789767;NP_789768;NT_167190;NW_001838028;NW_925106	AAB03572;AAB03572.1;AAB80712;AAB80712.1;AAB80713;AAB80713.1;AAG17247;AAG17247.1;AAH00571;AAH00571.1;AAH09391;AAH09391.1;AAM18129;AAM18129.1;AAP35417;AAP35417.1;ABM81686;ABM84534;ABM86072;AC_000054;AC_000143;AF007891;AF007892;AF007893;AF218005;AF498920;AL520218;AP002761;BC000571;BC009391;BT006771;CAA65770;CAA65770.1;CH471076;CR597500;CR598708;CR598765;CR605588;CR606834;CR612681;CR614658;CR617080;C…	Q15077;Q15754	P2RY6	pyrimidinergic receptor P2Y, G-protein coupled, 6	G-coupled nucleotide receptor; OTTHUMP00000237502; OTTHUMP00000237501; OTTHUMP00000237506; OTTHUMP00000237497; OTTHUMP00000237500; OTTHUMP00000237505; P2Y6 receptor; OTTHUMP00000237504; P2Y purinoceptor 6; P2 purinoceptor		0.6843	0.0001761
108	A_72_P146291	Galpha(q)-specific prostanoid GPCRs	5737	AC_000044;AC_000133;NC_000001;NM_000959;NM_001039585;NP_000950;NP_001034674;NT_032977;NW_001838579;NW_921351	AAA17684;AAA17684.1;AAB63152;AAB63152.1;AAC82378;AAI12966;AAI12966.1;AAQ76788;AAQ76788.1;AAR84381;AB041713;AB201108;ABM81883;ABM85046;AC_000044;AC_000133;AF004021;AF068679;AK292845;AK312816;AL136324;AY337000;AY485530;BAA94756;BAA94756.1;BAE03222;BAF85534;BAF85534.1;BC112965;BG771316;BQ897935;CA429969;CAC36038;CAC36038.1;CAI23426;CAI53641;CAI53647;CD013876;CH471059;CS008570;CS008582;DQ890957;DQ894…	A8K9Y0;P43088;Q2KHP3;Q9P1X4	PTGFR	prostaglandin F receptor (FP)	PGF2-alpha receptor; prostaglandin F2-alpha receptor; prostaglandin receptor (2-alpha); OTTHUMP00000011218; PGF2 alpha receptor; prostaglandin F2 alpha receptor; prostanoid FP receptor; PGF receptor; OTTHUMP00000037508		0.5954	0.0004151
109	A_72_P385693	Galpha(s)-specific amine GPCRs	3360	AC_000048;AC_000137;NC_000005;NG_029052;NM_000870;NM_001040169;NM_001040172;NM_001040173;NM_199453;NP_000861;NP_001035259;NP_001035262;NP_001035263;NP_955525;NT_029289;NW_001838953;NW_922784	AAH74755;AAH74755.1;AAH95497;AC008627;AC011390;AC091971;AC114939;AC_000048;AC_000137;AJ011371;AJ131724;AJ131725;AJ131726;AJ243213;AJ278979;AJ278980;AJ278981;AJ278982;AJ519673;AJ633645;AK308471;AM712912;BC074755;BC095497;CAA09600;CAA09600.1;CAA70002;CAA70002.1;CAA70774;CAA70774.1;CAA71462;CAA71462.1;CAA73107;CAA73107.1;CAA73108;CAA73108.1;CAA73109;CAA73109.1;CAA73911;CAA73911.1;CAA88167;CAA88167.1…	Q13639;Q96KH9;Q96KI0;Q9H199;Q9NY73;Q9UBM6;Q9UBT4;Q9UE22;Q9UE23;Q9UQR6	HTR4	5-hydroxytryptamine (serotonin) receptor 4	5-hydroxytryptamine receptor 4; OTTHUMP00000224250; OTTHUMP00000224252; OTTHUMP00000224281; OTTHUMP00000224282; OTTHUMP00000235919; OTTHUMP00000160384; OTTHUMP00000224254; OTTHUMP00000224307; cardiac 5-HT4 receptor		-0.3091	0.008304
110	A_72_P049716	H/ACA snoRNP	55651	AC_000048;AC_000137;NC_000005;NG_011765;NM_001034833;NM_017838;NP_001030005;NP_060308;NT_023133;NW_001838967;NW_922818	AAF28964;AAF28964.1;AAH00009;AAH00009.1;AAH06387;AAH06387.1;AAL02173;AAL02175;AAL02175.1;AC136632;AC_000048;AC_000137;AF161404;AF401217;AF401219;AJ293309;AK000486;BAA91198;BAA91198.1;BC000009;BC006387;BE797477;BG827491;BM913344;CAC08452;CAC08452.1;CAG33519;CAG33519.1;CH471165;CR457238;CR612055;EAW53848;NC_000005;NG_011765;NM_001034833;NM_017838;NP_001030005;NP_060308;NT_023133;NW_001838967;NW_922…	A6NKY8;Q9NX24;Q9P095	NHP2	NHP2 ribonucleoprotein homolog (yeast)	snoRNP protein NHP2; nucleolar protein family A member 2; nucleolar protein family A, member 2 (H/ACA small nucleolar RNPs); OTTHUMP00000161486; OTTHUMP00000223997; NHP2-like protein; H/ACA ribonucleoprotein complex subunit 2; OTTHUMP00000223998; OTTHUMP00000223999		0.2945	0.0003626
111	A_72_P165576	HAS	3037	AC_000051;AC_000140;NC_000008;NM_005328;NP_005319;NT_008046;NW_001839136;NW_923984	AAC50692;AAC50692.1;AAH69353;AAH69353.1;AAI09072;AAI09072.1;AAI09073;AAI09073.1;AC022909;AC104233;AC_000051;AC_000140;AK297724;BAG60078;BC069353;BC109071;BC109072;CAJ87378;CAL40919;CAL44783;CAL47700;CH471060;CS279104;CS389034;CS409308;CS410366;EAW92010;NC_000008;NM_005328;NP_005319;NT_008046;NW_001839136;NW_923984;Q92819;U54804	Q32MM3;Q92819	HAS2	hyaluronan synthase 2	HA synthase 2; hyaluronate synthase 2; hyaluronic acid synthase 2; OTTHUMP00000228014		-0.3586	0.004585
112	A_72_P165576	HAS2	3037	AC_000051;AC_000140;NC_000008;NM_005328;NP_005319;NT_008046;NW_001839136;NW_923984	AAC50692;AAC50692.1;AAH69353;AAH69353.1;AAI09072;AAI09072.1;AAI09073;AAI09073.1;AC022909;AC104233;AC_000051;AC_000140;AK297724;BAG60078;BC069353;BC109071;BC109072;CAJ87378;CAL40919;CAL44783;CAL47700;CH471060;CS279104;CS389034;CS409308;CS410366;EAW92010;NC_000008;NM_005328;NP_005319;NT_008046;NW_001839136;NW_923984;Q92819;U54804	Q32MM3;Q92819	HAS2	hyaluronan synthase 2	HA synthase 2; hyaluronate synthase 2; hyaluronic acid synthase 2; OTTHUMP00000228014	Hyaluronan synthase 2	-0.3586	0.004585
113	A_72_P408923	HMBOX1	79618	AC_000051;AC_000140;NC_000008;NG_016981;NM_001135726;NM_024567;NP_001129198;NP_078843;NT_167187;NW_001839127;NW_923907	AAH09259;AAH09259.2;AAH69242;AAH69242.1;AAS76643;AAS76643.1;AAZ81565;AAZ81565.1;ABB82947;ABB82947.1;ABZ92410;AC040975;AC091558;AC108449;AC_000051;AC_000140;AK025269;AK290683;AK295320;AK310959;AL832296;AY522342;BAB15099;BAB15099.1;BAF83372;BAF83372.1;BAG58297;BAG58297.1;BC009259;BC069242;CH471080;CR605519;DQ153248;DQ269478;EAW63496;EAW63496.1;EAW63497;EAW63498;EAW63499;EAW63499.1;EAW63500;EAW63500…	A4K385;A8K3R8;B4DHY5;D3DSU0;Q3Y6P1;Q6NT76;Q96GS5;Q9H701	HMBOX1	homeobox containing 1	OTTHUMP00000225645; OTTHUMP00000225640; homeobox-containing protein 1; OTTHUMP00000163064; homeobox-containing protein PBHNF; OTTHUMP00000225644; OTTHUMP00000225646; OTTHUMP00000225642	Homeobox-containing protein 1	0.2279	0.004978
114	A_72_P015331	HMG20B	10362	AC_000062;AC_000151;NC_000019;NM_006339;NP_006330;NT_011255;NW_001838476;NW_927173	AAC26860;AAC26860.1;AAC62837;AAC62837.1;AAF66707;AAF66707.1;AAF76253;AAF76253.1;AAG01174;AAG01174.1;AAG60060;AAG60060.1;AAH02552;AAH02552.1;AAH03505;AAH03505.2;AAH04408;AAH04408.2;AAH21585;AAH21585.1;AAI34414;AAL55873;ABZ92463;AC005786;AC116968;AC_000062;AC_000151;AF072165;AF072836;AF146223;AF288679;AF318366;AF331191;AK090733;AK129638;AK289500;AK310601;AK314201;AL355691;AL355702;AL355703;AL355709…	A6NMS5;D6W616;Q6IBP8;Q8NBD5;Q9HD21;Q9P0W2;Q9Y491;Q9Y4A2	HMG20B	high mobility group 20B	SWI/SNF-related matrix-associated actin-dependent regulator of chromatin subfamily E, member 1-related; HMG box domain containing 2; SWI/SNF-related matrix-associated actin-dependent regulator of chromatin subfamily E member 1-related; structural DNA-binding protein BRAF35; HMG domain-containing protein HMGX2; HMG box-containing protein 20B; BRCA2-associated factor 35; SMARCE1-related protein; OT…	SWI/SNF-related matrix-associated actin-dependent regulator of chromatin subfamily E member 1-related	0.1951	0.006397
115	A_72_P177881	HPRT	3251	AC_000066;AC_000155;NC_000023;NG_012329;NM_000194;NP_000185;NT_011786;NW_001842400;NW_927721	AAA36012;AAA36012.1;AAA52690;AAA52690.1;AAA52691;AAA52691.1;AAB21289;AAB21289.1;AAB59391;AAB59391.1;AAB59392;AAB59392.1;AAC60591;AAC60591.2;AAH00578;AAH00578.1;AAV31777;AAV31777.1;AAV38157;AAV38157.1;ABM86033;ABM86035;ABW03456;ABW03767;AC004383;AC_000066;AC_000155;AK313435;AY780550;BAG36226;BAG36226.1;BC000578;BT019350;CAG28573;CH471107;CR407645;CR614617;DQ895107;DQ895109;EAX11760;EAX11761;EAX117…	A6NHF0;B2R8M9;P00492	HPRT1	hypoxanthine phosphoribosyltransferase 1	hypoxanthine-guanine phosphoribosyltransferase; HGPRTase; OTTHUMP00000024061	Hypoxanthine-guanine phosphoribosyltransferase	-0.3284	0.0009963
116	A_72_P088766	HPS6	79803	AC_000053;AC_000142;NC_000010;NG_012029;NM_024747;NP_079023;NT_030059;NW_001838006;NW_924884	AAH11594;AAH11594.2;AAH14993;AAH14993.2;AAO25965;AAO25965.1;AC_000053;AC_000142;AF536238;AK026154;AL500527;BAB15378;BAB15378.1;BC009258;BC011594;BC014993;BC064917;BC080564;BI761726;CAH72214;CAH72214.1;CH471066;EAW49725;EAW49726;EAW49726.1;NC_000010;NG_012029;NM_024747;NP_079023;NT_030059;NW_001838006;NW_924884;Q86YV9	Q5VV69;Q86YV9;Q9H685	HPS6	Hermansky-Pudlak syndrome 6	ruby-eye protein homolog; OTTHUMP00000020357; Hermansky-Pudlak syndrome-6 protein (HPS6); Hermansky-Pudlak syndrome 6 protein	Hermansky-Pudlak syndrome 6 protein	0.6423	0.005939
117	A_72_P424164	HSP90	3326	AC_000049;AC_000138;NC_000006;NM_007355;NP_031381;NT_007592;NW_001838981;NW_923073;XR_108652;XR_112882;XR_113895	AAA36025;AAA36025.1;AAA36026;AAA36026.1;AAD14062;AAD14062.1;AAF82792;AAF82792.1;AAH04928;AAH04928.1;AAH07327;AAH09206;AAH09206.2;AAH12807;AAH12807.1;AAH14485;AAH14485.1;AAH16753;AAH16753.1;AAH68474;AAH68474.1;AAQ63401;AAQ63401.1;ABC40731;ABC40731.1;ABM83950;ABM87267;AC_000049;AC_000138;AF275719;AK025370;AK130494;AK290734;AK294643;AK297367;AK312255;AL136543;AL139392;AY359878;BAA22050;BAB15121;BAF8…	B2R5P0;P08238;Q5T9W7;Q9NQW0;Q9NTK6	HSP90AB1	heat shock protein 90kDa alpha (cytosolic), class B member 1	HSP84; HSP 84; heat shock protein HSP 90-beta; HSP 90; heat shock 84 kDa; OTTHUMP00000016517; OTTHUMP00000016519; OTTHUMP00000016518; heat shock 90kD protein 1, beta; 90-kda heat shock protein beta HSP90 beta; heat shock 90kDa protein 1, beta; heat shock protein beta		0.5984	0.007995
118	A_72_P424164	HSP90 beta	3326	AC_000049;AC_000138;NC_000006;NM_007355;NP_031381;NT_007592;NW_001838981;NW_923073;XR_108652;XR_112882;XR_113895	AAA36025;AAA36025.1;AAA36026;AAA36026.1;AAD14062;AAD14062.1;AAF82792;AAF82792.1;AAH04928;AAH04928.1;AAH07327;AAH09206;AAH09206.2;AAH12807;AAH12807.1;AAH14485;AAH14485.1;AAH16753;AAH16753.1;AAH68474;AAH68474.1;AAQ63401;AAQ63401.1;ABC40731;ABC40731.1;ABM83950;ABM87267;AC_000049;AC_000138;AF275719;AK025370;AK130494;AK290734;AK294643;AK297367;AK312255;AL136543;AL139392;AY359878;BAA22050;BAB15121;BAF8…	B2R5P0;P08238;Q5T9W7;Q9NQW0;Q9NTK6	HSP90AB1	heat shock protein 90kDa alpha (cytosolic), class B member 1	HSP84; HSP 84; heat shock protein HSP 90-beta; HSP 90; heat shock 84 kDa; OTTHUMP00000016517; OTTHUMP00000016519; OTTHUMP00000016518; heat shock 90kD protein 1, beta; 90-kda heat shock protein beta HSP90 beta; heat shock 90kDa protein 1, beta; heat shock protein beta	Heat shock protein HSP 90-beta	0.5984	0.007995
119	A_72_P407458	HSPC117	51493	AC_000065;AC_000154;NC_000022;NM_014306;NP_055121;NT_011520;NW_001838745;NW_927628	AAF29081;AAF29081.1;AAF67477;AAF67477.1;AAH00151;AAH00151.1;AAH02970;AAH02970.1;AAH10308;AAH10308.1;AAH16707;AAH16707.1;ABM81857;ABM85018;AC_000065;AC_000154;AF155658;AF161466;AK297826;AK297908;AK301945;AK312503;AL021937;AL050255;AL137272;BAG35405;BAG35405.1;BAG60162;BAG60227;BAG63363;BC000151;BC002970;BC010308;BC016707;BU615556;CAB38260;CAB38260.1;CAB43357;CAB43357.1;CAB70670;CAB70670.1;CAG30336…	B2R6A8;Q6IAI0;Q9BWL4;Q9NTH1;Q9P037;Q9P0J3;Q9Y3I0	C22orf28	chromosome 22 open reading frame 28	tRNA-splicing ligase RtcB homolog; OTTHUMP00000028639; ankyrin repeat domain 54	tRNA-splicing ligase RtcB homolog	0.207	0.004834
120	A_72_P385693	HTR4	3360	AC_000048;AC_000137;NC_000005;NG_029052;NM_000870;NM_001040169;NM_001040172;NM_001040173;NM_199453;NP_000861;NP_001035259;NP_001035262;NP_001035263;NP_955525;NT_029289;NW_001838953;NW_922784	AAH74755;AAH74755.1;AAH95497;AC008627;AC011390;AC091971;AC114939;AC_000048;AC_000137;AJ011371;AJ131724;AJ131725;AJ131726;AJ243213;AJ278979;AJ278980;AJ278981;AJ278982;AJ519673;AJ633645;AK308471;AM712912;BC074755;BC095497;CAA09600;CAA09600.1;CAA70002;CAA70002.1;CAA70774;CAA70774.1;CAA71462;CAA71462.1;CAA73107;CAA73107.1;CAA73108;CAA73108.1;CAA73109;CAA73109.1;CAA73911;CAA73911.1;CAA88167;CAA88167.1…	Q13639;Q96KH9;Q96KI0;Q9H199;Q9NY73;Q9UBM6;Q9UBT4;Q9UE22;Q9UE23;Q9UQR6	HTR4	5-hydroxytryptamine (serotonin) receptor 4	5-hydroxytryptamine receptor 4; OTTHUMP00000224250; OTTHUMP00000224252; OTTHUMP00000224281; OTTHUMP00000224282; OTTHUMP00000235919; OTTHUMP00000160384; OTTHUMP00000224254; OTTHUMP00000224307; cardiac 5-HT4 receptor	5-hydroxytryptamine receptor 4	-0.3091	0.008304
121	A_72_P177506	Histone H1	3009	AC_000049;AC_000138;NC_000006;NG_000009;NM_005322;NP_005313;NT_007592;NW_001838980;NW_923073	AAA35943;AAH69101;AAH69101.1;AAI01582;AAI01582.1;AAI01584;AAI01584.1;AAN06704;AAN06704.1;ABZ92488;AC_000049;AC_000138;AF531304;BC069101;BC101581;BC101583;CAA29930;CAA58498;CAA58498.1;CAB11421;CAB11421.1;CH471081;EAX03119;EU446959;K02570;M23203;NC_000006;NG_000009;NM_005322;NP_005313;NT_007592;NW_001838980;NW_923073;P16401;Q14463;X06757;X83509;Z98744	P16401;Q14529;Q3MJ42	HIST1H1B	histone cluster 1, H1b	H1 histone family, member 5; histone H1.5; OTTHUMP00000017748; histone 1, H1b; histone H1a		1.03	0.004613
122	A_72_P177506	Histone H1	3007	AC_000049;AC_000138;NC_000006;NG_001335;NM_005320;NP_005311;NT_007592;NW_001838974;NW_922984	AAA63186;AAA63186.1;AAI04875;AAI04875.1;AAI11972;AAI11972.1;AAN06703;AAN06703.1;ABZ92490;AC_000049;AC_000138;AF531303;AK312845;AL031777;BAG35698;BAG35698.1;BC104874;BC111971;CAB39189;CAB39189.1;CH471087;EAW55548;EAW55548.1;EU446961;M60747;NC_000006;NG_001335;NM_005320;NP_005311;NT_007592;NW_001838974;NW_922984;P16402	B2R751;P16402;Q2M2I2	HIST1H1D	histone cluster 1, H1d	histone 1, H1d; OTTHUMP00000016148; histone H1.3; H1 histone family, member 3; histone H1c		1.03	0.004613
123	A_72_P177506	Histone H1.3	3007	AC_000049;AC_000138;NC_000006;NG_001335;NM_005320;NP_005311;NT_007592;NW_001838974;NW_922984	AAA63186;AAA63186.1;AAI04875;AAI04875.1;AAI11972;AAI11972.1;AAN06703;AAN06703.1;ABZ92490;AC_000049;AC_000138;AF531303;AK312845;AL031777;BAG35698;BAG35698.1;BC104874;BC111971;CAB39189;CAB39189.1;CH471087;EAW55548;EAW55548.1;EU446961;M60747;NC_000006;NG_001335;NM_005320;NP_005311;NT_007592;NW_001838974;NW_922984;P16402	B2R751;P16402;Q2M2I2	HIST1H1D	histone cluster 1, H1d	histone 1, H1d; OTTHUMP00000016148; histone H1.3; H1 histone family, member 3; histone H1c	Histone H1.3	1.03	0.004613
124	A_72_P177506	Histone H1.5	3009	AC_000049;AC_000138;NC_000006;NG_000009;NM_005322;NP_005313;NT_007592;NW_001838980;NW_923073	AAA35943;AAH69101;AAH69101.1;AAI01582;AAI01582.1;AAI01584;AAI01584.1;AAN06704;AAN06704.1;ABZ92488;AC_000049;AC_000138;AF531304;BC069101;BC101581;BC101583;CAA29930;CAA58498;CAA58498.1;CAB11421;CAB11421.1;CH471081;EAX03119;EU446959;K02570;M23203;NC_000006;NG_000009;NM_005322;NP_005313;NT_007592;NW_001838980;NW_923073;P16401;Q14463;X06757;X83509;Z98744	P16401;Q14529;Q3MJ42	HIST1H1B	histone cluster 1, H1b	H1 histone family, member 5; histone H1.5; OTTHUMP00000017748; histone 1, H1b; histone H1a	Histone H1.5	1.03	0.004613
125	A_72_P349138	Histone H3	3021	AC_000060;AC_000149;NC_000017;NM_005324;NP_005315;NT_010783;NW_001838454;NW_926918	AAA52653.1;AAA52654.1;AAG17271;AAG17271.1;AAH01124;AAH01124.1;AAH06497;AAH06497.1;AAH12813;AAH12813.1;AAH17558;AAH17558.1;AAH29405.1;AAH38989.1;AAH81560.1;AAH81561.1;AAH95447.1;AAI08702;AAI08702.1;ABZ92486;AC087289;AC_000060;AC_000149;AF218029;AK054591;AK130772;AK304607;AK312762;AL512343;AM393192;BAG35628;BAG65392;BC001124;BC006497;BC012813;BC017558;BC020466;BC029405;BC038989;BC066901;BC067757;BC…	P06351;P33155;P84243;Q5VV55;Q5VV56;Q66I33;Q9V3W4	H3F3B	H3 histone, family 3B (H3.3B)	histone H3.3; H3 histone, family 3A		0.4344	0.001135
126	A_72_P349138	Histone H3.3	3021	AC_000060;AC_000149;NC_000017;NM_005324;NP_005315;NT_010783;NW_001838454;NW_926918	AAA52653.1;AAA52654.1;AAG17271;AAG17271.1;AAH01124;AAH01124.1;AAH06497;AAH06497.1;AAH12813;AAH12813.1;AAH17558;AAH17558.1;AAH29405.1;AAH38989.1;AAH81560.1;AAH81561.1;AAH95447.1;AAI08702;AAI08702.1;ABZ92486;AC087289;AC_000060;AC_000149;AF218029;AK054591;AK130772;AK304607;AK312762;AL512343;AM393192;BAG35628;BAG65392;BC001124;BC006497;BC012813;BC017558;BC020466;BC029405;BC038989;BC066901;BC067757;BC…	P06351;P33155;P84243;Q5VV55;Q5VV56;Q66I33;Q9V3W4	H3F3B	H3 histone, family 3B (H3.3B)	histone H3.3; H3 histone, family 3A	Histone H3.3	0.4344	0.001135
127	A_72_P262357	ICA69	3382	AC_000050;AC_000068;AC_000139;NC_000007;NM_001136020;NM_004968;NM_022307;NP_001129492;NP_004959;NP_071682;NT_007819;NT_079592;NW_001839003;NW_923240	AA581444;AAA02564;AAA02564.1;AAA64927;AAA64927.1;AAB19033;AAB19033.1;AAB19034;AAB94737;AAB94738;AAB94738.1;AAC50935;AAC50935.1;AAC50936;AAD50515;AAH08640;ABM82431;ABW03414;AC006042;AC007009;ACB47390;AC_000050;AC_000068;AC_000139;AI346099;AK292106;AM393016;BAF84795;BAF84795.1;BC005922;BC008640;BM716117;CAL37894;CAY55971;CAY55972;CH236948;CH471073;CR601104;CR605198;CR620744;CR624499;DB040266;DQ8915…	A8K7U1;P78506;Q05084;Q13824	ICA1	islet cell autoantigen 1, 69kDa	islet cell autoantigen 1 isoform; 69 kDa islet cell autoantigen; p69; OTTHUMP00000200941; islet cell autoantigen 1; OTTHUMP00000200934; islet cell autoantigen 1 (69kD); diabetes mellitus type I autoantigen; OTTHUMP00000200993; OTTHUMP00000200933; islet cell autoantigen p69	Islet cell autoantigen 1	-0.5468	0.001915
128	A_72_P232282	IGF-1	3479	AC_000055;AC_000144;NC_000012;NG_011713;NM_000618;NM_001111283;NM_001111284;NM_001111285;NP_000609;NP_001104753;NP_001104754;NP_001104755;NT_029419;NW_001838061;NW_925395	AAA52537;AAA52537.1;AAA52538;AAA52538.1;AAA52539;AAA52539.1;AAA52543;AAA52787;AAA52787.1;AAA52789;AAA96152;AAB21519;AAI48267;AAI48267.1;AAI52322;AAI60082;AAO74829;AAO74829.1;AAV40833;AB209184;AC010202;AC068648;AC_000055;AC_000144;AK312231;AY260957;AY790940;BAD92421;BAG35164;BC148266;BC152321;BC160082;CAA24998;CAA24998.1;CAA27152;CAA27152.1;CAA27153;CAA27153.1;CAA27154;CAA27154.1;CAA27250;CAA27250…	B2RWM7;P01343;P05019	IGF1	insulin-like growth factor 1 (somatomedin C)	insulin-like growth factor IA; IGF-IA; somatomedin-C; mechano growth factor; insulin-like growth factor IB; insulin-like growth factor 1; OTTHUMP00000195082; OTTHUMP00000195084; OTTHUMP00000195080; OTTHUMP00000195083; OTTHUMP00000195081; insulin-like growth factor I; IGF-IB; MGF	Insulin-like growth factor I	-0.5135	0.001246
129	A_72_P341523	IKAP	8518	AC_000052;AC_000141;NC_000009;NG_008788;NM_003640;NP_003631;NT_008470;NW_001839236;NW_924539	AAC64258;AAC64258.1;AAG43369;AAG43369.1;AAH33094;AB210033;AC_000052;AC_000141;AF044195;AF153419;AK001641;AK022559;AK024223;AK123257;AK127237;AK225798;AK289962;AK304742;AL049945;AL354797;AL359692;BAE06115;BAF82651;BAF82651.1;BAG50955;BAG50955.1;BAG51092;BAG51274;BAG53883;BAG54459;BAG65501;BC033094;BF968300;BX648204;CAB43219;CAB43219.1;CAH18235;CAI39465;CAI39465.1;CAI40569;CAI40569.1;CH471105;CR749…	O95163;Q5JSV2;Q9H327;Q9UG87	IKBKAP	inhibitor of kappa light polypeptide gene enhancer in B-cells, kinase complex-associated protein	IKK complex-associated protein; elongator complex protein 1; p150; dysautonomia (Riley-Day syndrome, hereditary sensory autonomic neuropathy type III); OTTHUMP00000021869; ikappaB kinase complex-associated protein	Elongator complex protein 1	-0.7129	7.83e-05
130	A_72_P198287	ING2	3622	AC_000047;AC_000136;NC_000004;NM_001564;NP_001555;NT_016354;NW_001838921;NW_922217	AAG11395;AAG11395.1;AAG11396;AAG11396.1;AAH30128;AAH30128.1;AB012853;AB196793;AC107214;AC_000047;AC_000136;ADQ32258;AF053537;AF062747;AF062748;AJ006851;AK294310;AK314000;BAA36419;BAA36419.1;BAF30476;BAG36712;BAH11731;BC030128;BM929984;CAC20567;CAC20567.1;CH471056;EAX04689;EAX04690;HQ447773;NC_000004;NM_001564;NP_001555;NT_016354;NW_001838921;NW_922217;Q9H160	O95698;Q9H160	ING2	inhibitor of growth family, member 2	inhibitor of growth 1-like protein; ING1Lp; inhibitor of growth protein 2; p32; OTTHUMP00000197671; inhibitor of growth family, member 1-like	Inhibitor of growth protein 2	0.5422	0.004364
131	A_72_P118121	IRP	3658	AC_000058;AC_000147;NC_000015;NM_004136;NP_004127;NT_010194;NW_001838219;NW_925907	AAA69901;AAA69901.1;AAA79926;AAA79926.1;AAH17880;AAI17482;AAI17482.1;AAI17484;AAI17484.1;AB209403;ABF47091;ABF47091.1;AC011270;AC027228;AC_000058;AC_000147;ADR83414;AK027033;AK027034;AK292992;AL133439;BAD92640;BAD92640.1;BAF85681;BAF85681.1;BC017880;BC117481;BC117483;BC143948;BX340905;CAB62825;CAB62825.1;CH471136;CN290278;CR593632;CR610815;DQ496102;EAW99169;EAW99169.1;EAW99170;EAW99171;HQ258663;M…	A8KAC7;P48200;Q13095;Q1HE21;Q59FQ7;Q9UF17	IREB2	iron-responsive element binding protein 2	iron-responsive element-binding protein 2; IRE-BP 2; OTTHUMP00000185022; iron regulatory protein 2		-0.3058	0.00495
132	A_72_P118121	IRP2	3658	AC_000058;AC_000147;NC_000015;NM_004136;NP_004127;NT_010194;NW_001838219;NW_925907	AAA69901;AAA69901.1;AAA79926;AAA79926.1;AAH17880;AAI17482;AAI17482.1;AAI17484;AAI17484.1;AB209403;ABF47091;ABF47091.1;AC011270;AC027228;AC_000058;AC_000147;ADR83414;AK027033;AK027034;AK292992;AL133439;BAD92640;BAD92640.1;BAF85681;BAF85681.1;BC017880;BC117481;BC117483;BC143948;BX340905;CAB62825;CAB62825.1;CH471136;CN290278;CR593632;CR610815;DQ496102;EAW99169;EAW99169.1;EAW99170;EAW99171;HQ258663;M…	A8KAC7;P48200;Q13095;Q1HE21;Q59FQ7;Q9UF17	IREB2	iron-responsive element binding protein 2	iron-responsive element-binding protein 2; IRE-BP 2; OTTHUMP00000185022; iron regulatory protein 2	Iron-responsive element-binding protein 2	-0.3058	0.00495
133	A_72_P153021	Immunoproteasome (20S core)	5687	AC_000057;AC_000146;NC_000014;NG_011703;NM_002791;NP_002782;NT_026437;NW_001838110;NW_925539	AAG61139;AAH02979;AAH02979.1;AAH17882;AAH17882.1;AAH22354;AAH22354.1;AAH23659;AAH23659.1;AAH70137;AAH70137.1;ABM83272;ABM86477;AC_000057;AC_000146;AF332577;AK298920;AK302008;AK313011;AK316223;AL121594;AL133163;BAA05800;BAG35846;BAG35846.1;BAG61026;BAG63411;BAH14594;BC002979;BC017882;BC022354;BC023659;BC070137;BG701535;CAA42052;CAA42052.1;CAA43964;CAA43964.1;CAG33225;CAG33225.1;CH471078;CR456944;C…	B2R7J9;P34062;P60900;Q6IB60	PSMA6	proteasome (prosome, macropain) subunit, alpha type, 6	macropain iota chain; proteasome subunit alpha type-6; PROS-27; OTTHUMP00000178843; proteasome subunit iota; multicatalytic endopeptidase complex iota chain; prosomal P27K protein; 27 kDa prosomal protein; macropain subunit iota; proteasome iota chain		0.2855	0.004401
134	A_72_P143817	Immunoproteasome (20S core)	5692	AC_000044;AC_000133;NC_000001;NM_002796;NP_002787;NT_004487;NW_001838529;NW_925683	AAB31085;AAB31085.1;AAP35563;AAP35563.1;ABM81674;ABM82946;ABM86138;AC_000044;AC_000133;AK294149;AK313825;AL589764;BAA05647;BAA05647.1;BAG36560;BAG36560.1;BAG57474;BC000331;BC008314;BC010088;BC010098;BC011768;BC012168;BC017307;BC017451;BC017486;BT006917;CAG33101;CAG33101.1;CAI16806;CAI16806.1;CH471121;CR456820;CR591973;CR596742;CR600806;CR601408;CR604816;CR604973;CR611217;CR612779;CR614383;CR61485…	B2R9L3;P28070;P31148;Q5SZS5;Q6IBI4;Q969L6	PSMB4	proteasome (prosome, macropain) subunit, beta type, 4	proteasome subunit beta type-4; 26 kDa prosomal protein; hsBPROS26; proteasome subunit HsN3; proteasome chain 3; proteasome beta chain; multicatalytic endopeptidase complex beta chain; OTTHUMP00000014463; proteasome subunit, beta type, 4; macropain beta chain		0.2579	0.005218
135	A_72_P116656	Jumpy	64419	AC_000046;AC_000135;NC_000003;NG_017068;NM_001077525;NM_001077526;NM_022485;NP_001070993;NP_001070994;NP_071930;NT_022517;NW_001838876;NW_921651	AAH01674;AAH01674.2;AAH25952;AAH25952.2;AAH35690;AAH35690.1;AAH50626;AAH50626.1;AAL55787;AAS50151;AAS50151.1;ABG02221;ABG02221.1;AC022382;AC024163;ACE86886;ACE87573;AC_000046;AC_000135;AF289603;AK021608;AK026058;AK074792;AK128312;AK295891;AK298846;AL713695;AM393050;AM393309;AY007098;AY545552;BAB15340;BAB15340.1;BAC11211;BAC11211.1;BAG58685;BAG60971;BC001674;BC025952;BC035690;BC050626;BF796406;CAD…	Q0JTH5;Q0JU83;Q6PIZ4;Q6QE21;Q86VK9;Q8IYK1;Q8NCE2;Q8TCM7;Q9H6C0	MTMR14	myotubularin related protein 14	HCV NS5A-transactivated protein 4 splice variant A-binding protein 1; myotubularin-related protein 14; jumpy; egg-derived tyrosine phosphatase homolog; chromosome 3 open reading frame 29; OTTHUMP00000207250; OTTHUMP00000207251; NS5ATP4ABP1; OTTHUMP00000207254	Myotubularin-related protein 14	0.3825	0.0007919
136	A_72_P069846	KAD6	6880	AC_000048;AC_000137;NC_000005;NM_001015891;NM_001015892;NM_003187;NM_016283;NP_001015891;NP_001015892;NP_003178;NP_057367;NT_006713;NW_001838935;NW_003315917;NW_922618	AAA84389;AAA84389.1;AAA91318;AAA91318.1;AAC50153;AAC50153.1;AAD34132;AAD34132.1;AAF14860;AAF14860.1;AAH03400;AAH03400.1;AAH07349;AAH07349.1;AAH07426;AAH07426.1;AAH33320;AAH33320.1;AAN84793;AAN84793.1;AAV38458;AAV38458.1;AC145132;AC145145;ACE86721;ACE87407;AC_000048;AC_000137;AF110777;AF151895;AI879232;AJ878880;AJ878881;AY189986;BC003400;BC007349;BC007426;BC033320;BG490028;BG720149;BT019652;BX1178…	A8MSZ6;D3DWA3;Q16594;Q5F2S9;Q5U0D1;Q9BTS1;Q9Y3D8	TAF9	TAF9 RNA polymerase II, TATA box binding protein (TBP)-associated factor, 32kDa	coilin-interacting nuclear ATPase protein; transcription initiation factor TFIID subunit 9; adenylate kinase isoenzyme 6; RNA polymerase II TBP-associated factor subunit G; TAFII-32; TAFII-31; STAF31/32; TATA box binding protein (TBP)-associated factor, RNA polymerase II, G, 32kD; coilin interacting protein; OTTHUMP00000125196; transcription initiation factor TFIID 31 kD subunit; OTTHUMP000002221…	Adenylate kinase isoenzyme 6	-0.6039	0.007141
137	A_72_P160996	KATNA1	11104	AC_000049;AC_000138;NC_000006;NM_001204076;NM_007044;NP_001191005;NP_008975;NT_025741;NW_001838990;NW_923184	AAC25114;AAC25114.1;AAH50428;AAH50428.1;AC_000049;AC_000138;AF056022;AK292090;AL078581;BAF84779;BC050428;BX276089;CA426364;CAI16431;CAI16431.1;CAI16432;CAI16432.1;CAI16433;CAI16434;CAI19504;CAI19504.1;CAI19505;CAI19505.1;CAI19506;CAI19507;CH471051;CR590166;CR600129;CR601101;DB031858;EAW47793;EAW47793.1;EAW47794;EAW47795;EAW47795.1;NC_000006;NM_001204076;NM_007044;NP_001191005;NP_008975;NT_025741;…	E1P5A3;O75449;Q5TFA8;Q5TFA9;Q86VN2;Q9NU52	KATNA1	katanin p60 (ATPase containing) subunit A 1	katanin p60 subunit A1; p60 katanin; katanin p60 (ATPase-containing) subunit A 1; katanin p60 ATPase-containing subunit A1; OTTHUMP00000042860; OTTHUMP00000017392	Katanin p60 ATPase-containing subunit A1	-0.5695	0.008768
138	A_72_P362433	KCTD7	154881	AC_000050;AC_000068;AC_000139;NC_000007;NG_028110;NM_001167961;NM_153033;NP_001161433;NP_694578;NT_007933;NT_079593;NW_001839038;NW_923417	AAH42482;AAH42482.1;AC006001;AC_000050;AC_000068;AC_000139;AK055201;AK056631;BAB71236;BAB71236.1;BC042482;BU682845;BY795857;CH236961;CH471140;CN371295;DA493191;DB095774;EAL23735;EAL23735.1;EAX07918;EAX07919;EAX07919.1;EAX07920;NC_000007;NG_028110;NM_001167961;NM_153033;NP_001161433;NP_694578;NT_007933;NT_079593;NW_001839038;NW_923417;Q96MP8	A4D2M4;Q8IVR0;Q96MP8	KCTD7	potassium channel tetramerisation domain containing 7	OTTHUMP00000210531; OTTHUMP00000159940; BTB/POZ domain-containing protein KCTD7; OTTHUMP00000210530	BTB/POZ domain-containing protein KCTD7	-0.5005	0.0008596
139	A_72_P107181;A_72_P056791	KIAA0406	9675	AC_000063;AC_000152;NC_000020;NM_014657;NP_055472;NT_011362;NW_001838665;NW_927339	AAH13121;AAH13121.1;AAH13755;AAH13755.1;AAI07779;AAI31760;AB007866;AC_000063;AC_000152;AK308164;AL109823;BAA23702;BAA23702.2;BC013121;BC013755;BC107778;BC131759;BR000854;CAI19022;CAI19022.1;CH471077;CR596340;CR607862;EAW76047;EAW76048;EAW76049;EAW76050;FAA00688;NC_000020;NM_014657;NP_055472;NT_011362;NW_001838665;NW_927339;O43156;Q3B768	O43156;Q5JX67;Q96A38;Q9BR47;Q9H4K0	TTI1	Tel2 interacting protein 1 homolog (S. pombe)	KIAA0406; OTTHUMP00000030950; TEL2-interacting protein 1 homolog; OTTHUMP00000030952; smg-10 homolog, nonsense mediated mRNA decay factor; Tel two interacting protein 1	TEL2-interacting protein 1 homolog	-0.3789	0.001141
140	A_72_P246312	KIAA1219	57148	AC_000063;AC_000152;NC_000020;NM_020336;NP_065069;NT_011362;NW_001838666;NW_927339	AAH10916;AAH10916.2;AAH18668;AAH18668.1;AAH47482;AAH47482.1;AB033045;AC_000063;AC_000152;AK026771;AK123576;AK125260;AK125916;AK304242;AL035419;AL049868;AL132998;AL834436;BAA86533;BAA86533.3;BAC85649;BAC85649.1;BAG54177;BAG65110;BC010916;BC018668;BC036425;BC047482;BX641080;CAB61346;CAB61346.1;CAD39096;CAD39096.1;CAE46039;CAI23368;CAM27455;CAM27455.1;CAM27456;CAM27457;CAM28344;CAM28344.1;CAM28345;C…	A2A2E8;Q5TG31;Q86X10;Q8N3D1;Q8WWC0;Q9H3X8;Q9UJR1;Q9ULK1;Q9Y3G9	RALGAPB	Ral GTPase activating protein, beta subunit (non-catalytic)	OTTHUMP00000178925; ral GTPase-activating protein beta subunit; p170; OTTHUMP00000178924; OTTHUMP00000030968; ral GTPase-activating protein subunit beta; KIAA1219; OTTHUMP00000030966	Ral GTPase-activating protein subunit beta	0.4818	0.000964
141	A_72_P304664	LMTK2	22853	AC_000050;AC_000068;AC_000139;NC_000007;NG_013375;NM_014916;NP_055731;NT_007933;NT_079595;NW_001839064;NW_923574	AAI31505;AAI67828;AAN08717;AAN08717.1;AAS07515;AAS07515.1;AB029002;AC073101;AC091654;AC_000050;AC_000068;AC_000139;AK128506;AW183515;AY130988;BAA83031;BAA83031.2;BC080576;BC131504;BC146773;BC167828;BE049530;BF001752;BM172505;CAM91184;CH236956;CH471091;CS542494;EAL23894;EAL23894.1;EAW76719;EAW76720;EAW76721;EAW76721.1;NC_000007;NG_013375;NM_014916;NP_055731;NT_007933;NT_079595;NW_001839064;NW_9235…	A4D272;Q75MG7;Q8IWU2;Q9UPS3	LMTK2	lemur tyrosine kinase 2	apoptosis-associated tyrosine kinase 2; serine/threonine-protein kinase KPI-2; CDK5/p35-regulated kinase; cyclin-dependent kinase 5/p35-regulated kinase; serine/threonine-protein kinase LMTK2; kinase/phosphatase/inhibitor 2; hBREK; OTTHUMP00000205379; kinase phosphatase inhibitor 2; brain-enriched kinase	Serine/threonine-protein kinase LMTK2	-0.3631	0.002538
142	A_72_P349138	LOC440093	440093	AC_000055;AC_000144;NC_000012;NM_001013699;NP_001013721;NT_009714;NW_001838055;NW_925295	AAH66906;AAH66906.1;AC023050;AC_000055;AC_000144;ADW85800;AI016942;BC066906;CH471116;EAW88541;HQ873957;NC_000012;NM_001013699;NP_001013721;NT_009714;NW_001838055;NW_925295;Q6NXT2	Q6NXT2	H3F3C	H3 histone, family 3C	histone H3.3C; OTTHUMP00000212458; histone variant H3.5	Histone H3.3C	0.4344	0.001135
143	A_72_P093141	LOC653319	653319	AC_000059;AC_000148;NC_000016;NM_001040715;NP_001035805;NT_010498;NW_001838290;NW_926462	AAH07594;AAH07594.1;AAH80183;AAH80183.1;AAI28540;AAI28540.1;AC040160;AC074143;AC_000059;AC_000148;AK092303;AK094787;AK096855;AL834156;BAC03856;BAC03856.1;BC007594;BC080183;BC128539;BX460002;CAD38862;CAD38862.1;CH471092;EAW83091;EAW83091.1;NC_000016;NM_001040715;NP_001035805;NT_010498;NW_001838290;NW_926462;Q68EN5	A2VCS8;Q68EN5;Q8N3H9;Q8NAQ5;Q96IE5	KIAA0895L	KIAA0895-like	hypothetical protein LOC653319	Uncharacterized protein KIAA0895-like	0.269	0.007719
144	A_72_P098341	LUC7A	51747	AC_000060;AC_000149;NC_000017;NM_006107;NM_016424;NP_006098;NP_057508;NT_010783;NW_001838448;NW_926894	AAC79807;AAC79807.1;AAH02925;AAH47043;AAH56409;AAH56409.1;AAI56955;AAY26238;AAY26238.1;AB034205;AC005921;AC_000060;AC_000149;AF069250;AF147357;AK001925;AK023672;AK027723;AK225980;AK290540;AK295983;AL050121;BAA90542.1;BAA91981;BAA91981.1;BAF83229;BAG51216;BAG51216.1;BAG58758;BC002925;BC047043;BC056409;BC061896;BC156954;BG213545;CH471109;CN271700;CR603552;CR621017;DA231851;DQ013876;EAW94583;EAW9458…	B3KN54;D3DTY1;O95232;Q6PHR9;Q9NUY0;Q9P2S7	LUC7L3	LUC7-like 3 (S. cerevisiae)	cAMP regulatory element-associated protein 1; okadaic acid-inducible phosphoprotein OA48-18; luc7-like protein 3; cisplatin resistance-associated overexpressed protein; OTTHUMP00000221730; OTTHUMP00000221733; cisplatin resistance associated overexpressed protein; cisplatin resistance-associated-overexpressed protein; CRE-associated protein 1; OTTHUMP00000221731	Luc7-like protein 3	0.6165	0.004735
145	A_72_P397013	Large 39S subunit	64928	AC_000049;AC_000138;NC_000006;NM_032111;NP_115487;NT_007592;NW_001838981;NW_923073	AA758781;AAH65005;AAH65005.1;AB051339;AC_000049;AC_000138;ADQ33133;AK312086;AL109615;AL365192;BAB54929;BAB54929.2;BAG35022;BAG35022.1;BC010416;BC065005;BM559405;BM910935;CAI19245;CAI19245.1;CH471081;CR625056;EAX04242;EAX04243;EAX04243.1;EAX04244;EAX04245;HQ448655;NC_000006;NM_032111;NP_115487;NT_007592;NW_001838981;NW_923073;Q6P1L8	B2R575;Q6P1L8;Q96Q72	MRPL14	mitochondrial ribosomal protein L14	OTTHUMP00000016500; 39S ribosomal protein L32, mitochondrial; 39S ribosomal protein L14, mitochondrial		0.4779	0.001782
146	A_72_P217482;A_72_P020461	Large 60S subunit	4736	AC_000049;AC_000138;NC_000006;NG_011708;NM_007104;NP_009035;NT_007592;NW_001838980;NW_923073	AAA86463;AAA86463.1;AAH06791;AAH06791.1;AAH11366;AAH11366.1;AAH70216;AAH70216.1;AAI16457;AAV38843;AAV38843.1;AAV38844;AAV38844.1;AB082926;ABM82056;ABM85235;AC_000049;AC_000138;AF086557;AK313181;AL022721;BAC16802;BAC16802.1;BAG35998;BAG35998.1;BC006791;BC011366;BC013864;BC070216;BC116456;BP318268;BT020040;BT020041;CAB38627;CAB38627.1;CBJ05781;CBJ21233;CH471081;CR593085;CR597757;CR598556;CR599594;C…	B2R801;P52859;P53025;P62906;Q5TZT6;Q8J013	RPL10A	ribosomal protein L10a	NEDD-6; 60S ribosomal protein L10a; OTTHUMP00000016255; neural precursor cell expressed developmentally down-regulated protein 6		0.2819	0.005794
147	A_72_P428814	MAL	4118	AC_000045;AC_000134;NC_000002;NM_002371;NM_022438;NM_022439;NM_022440;NP_002362;NP_071883;NP_071884;NP_071885;NT_022171;NW_001838807;NW_927964	AAA36196;AAA36196.1;AAH00458;AAH00458.1;AAH03006;AAH03006.1;AAY24121;AC103563;AC_000045;AC_000134;AK311844;BAG34786;BC000458;BC003006;CAA53809;CAA53809.1;CAA54100;CAA54100.1;CAA54101;CAA54101.1;CAA54102;CAA54102.1;CAA54103;CAA54103.1;CAG46677;CBX53807;CBX53808;CBX53809;CBX53810;CH471219;CR541879;EAX10705;EAX10706;EAX10707;EAX10708;EAX10709;EAX10710;HI178996;HI178998;HI179000;HI179002;M15800;NC_00…	P21145	MAL	mal, T-cell differentiation protein	OTTHUMP00000162860; OTTHUMP00000162859; OTTHUMP00000162862; T-lymphocyte maturation-associated protein; OTTHUMP00000162861; T-cell differentiation protein MAL; myelin and lymphocyte protein	Myelin and lymphocyte protein	0.9385	0.0006027
148	A_72_P106976	MAP1LC3A	84557	AC_000063;AC_000152;NC_000020;NG_011497;NM_032514;NM_181509;NP_115903;NP_852610;NT_011362;NW_001838664;NW_927339	AAH15810;AAH15810.1;AAK35151;AAK35151.1;AAP36120;AAP36120.1;ABM84567;ABM86462;AC_000063;AC_000152;AF276658;AL118520;AL833855;AM392590;BC015810;BM919877;BT007452;CAC14078;CAC14078.1;CAD38714;CAD38714.1;CAI40290;CAI40290.1;CAL37468;CH471077;CR597014;DQ893641;DQ895536;EAW76263;EAW76263.1;EAW76264;EAW76264.1;EAW76265;EAW76265.1;EAW76266;EAW76266.1;H18312;NC_000020;NG_011497;NM_032514;NM_181509;NP_115…	E1P5P4;E1P5P5;Q9BXW5;Q9H492	MAP1LC3A	microtubule-associated protein 1 light chain 3 alpha	MAP1A/MAP1B LC3 A; MAP1A/MAP1B light chain 3 A; autophagy-related ubiquitin-like modifier LC3 A; OTTHUMP00000030698; microtubule-associated proteins 1A/1B light chain 3A; autophagy-related protein LC3 A; OTTHUMP00000030697; MAP1A/1B light chain 3 A; MAP1 light chain 3-like protein 1; microtubule-associated proteins 1A/1B light chain 3; OTTHUMP00000030696	Microtubule-associated proteins 1A/1B light chain 3A	0.3288	0.003536
149	A_72_P378073	MAPKAPK3	7867	AC_000046;AC_000135;NC_000003;NM_004635;NP_004626;NT_022517;NW_001838877;NW_921651	AAC50428;AAC50428.1;AAD09136;AAD09136.1;AAH01662;AAH01662.1;AAH07591;AAH07591.1;AAH10407;AAH10407.1;AB451303;AB451434;AC096920;ACE87034;ACE87718;AC_000046;AC_000135;ADQ32312;AK290969;AK313565;BAF83658;BAG36339;BAG70117;BAG70117.1;BAG70248;BC001662;BC007591;BC010407;BC068497;CH471055;CR606251;EAW65131;EAW65131.1;EAW65132;EAW65133;EU832627;EU832702;HQ447828;NC_000003;NM_004635;NP_004626;NT_022517;N…	B5BU67;Q16644	MAPKAPK3	mitogen-activated protein kinase-activated protein kinase 3	MAPKAP kinase 3; MAPKAPK-3; chromosome 3p kinase; MAPK-activated protein kinase 3; OTTHUMP00000210806; MAP kinase-activated protein kinase 3; OTTHUMP00000210807; OTTHUMP00000210805	MAP kinase-activated protein kinase 3	-0.4016	0.0009392
150	A_72_P227562	MARCH6	10299	AC_000048;AC_000137;NC_000005;NM_005885;NP_005876;NT_006576;NW_001838927;NW_922518	AAB66840;AAB66840.1;AAH46148;AAH46148.1;AAI36462;AAI36462.1;AAI36463;AAI36463.1;AAI42680;AAI42680.1;AAI42695;AAI42695.1;AB011169;AC012640;AC092336;AC_000048;AC_000137;AF009301;AK000970;AK296585;AK299339;AK300034;AK314686;BAA25523;BAA25523.1;BAG37238;BAG50840;BAG59204;BAG61341;BAG61845;BC013761;BC039293;BC046148;BC111494;BC136461;BC136462;BC142679;BC142694;CAH05341;CH471102;CQ834252;CR603299;EAX08…	A5PKZ4;D3DTC8;O14670;O60337;Q86X77	MARCH6	membrane-associated ring finger (C3HC4) 6	protein TEB-4; membrane-associated RING finger protein 6; E3 ubiquitin-protein ligase MARCH6; RING finger protein 176; doa10 homolog; OTTHUMP00000221094; OTTHUMP00000221092; OTTHUMP00000221093; membrane-associated RING-CH protein VI	E3 ubiquitin-protein ligase MARCH6	-0.3029	0.009688
151	A_72_P336048	MEK6(MAP2K6)	5608	AC_000060;AC_000149;NC_000017;NM_002758;NP_002749;NT_010783;NW_001838454;NW_926918	AA932919;AAB03705;AAB03705.1;AAB03708;AAB03708.1;AAB05035;AAB05035.1;AAC50388;AAC50388.1;AAC50389;AAC50389.1;AAH12009;AAH12009.1;AB451252;AB451376;ABM82414;ABM85599;ABY87539;AC002546;AC015920;AC_000060;AC_000149;AK225719;AK290747;BAA13496;BAA13496.1;BAF83436;BAG70066;BAG70190;BC012009;BX641121;CAA65532;CAA65532.1;CAE46056;CH471099;CR604345;CR616398;CR624804;CR625265;D87905;DB111443;DQ891488;DQ894…	P52564	MAP2K6	mitogen-activated protein kinase kinase 6	MAPKK 6; MAP kinase kinase 6; dual specificity mitogen-activated protein kinase kinase 6; MEK 6; MAPK/ERK kinase 6; protein kinase, mitogen-activated, kinase 6 (MAP kinase kinase 6)	Dual specificity mitogen-activated protein kinase kinase 6	-0.4663	0.009866
152	A_72_P357918;A_72_P298814	MLCP (cat)	5500	AC_000045;AC_000134;NC_000002;NM_002709;NM_206876;NP_002700;NP_996759;NT_022184;NW_001838768;NW_927719	AAA85093;AAA85093.1;AAF01137;AAF01137.1;AAH02697;AAH02697.1;AAH12045;AAH12045.1;AAV38549;AAV38549.1;AAY24124;AAY24124.1;AC097724;AC_000045;AC_000134;AF092905;AI147919;AK295957;AK303682;AK312329;AK316532;AM392772;BAG35251;BAG35251.1;BAG58737;BAG64675;BAH14903;BC002697;BC012045;BE047402;BI551898;BM835970;BQ933435;BT019744;BU740022;BX477003;BX647295;BX647970;CAA56870;CAA56870.1;CAG47059;CAG47059.1;C…	B2R5V4;D6W565;P37140;P62140;Q5U087;Q6FG45	PPP1CB	protein phosphatase 1, catalytic subunit, beta isozyme	protein phosphatase 1, catalytic subunit, delta isoform; serine/threonine protein phosphatase PP1-beta catalytic subunit; serine/threonine-protein phosphatase PP1-beta catalytic subunit; protein phosphatase 1, catalytic subunit, beta isoform; protein phosphatase 1-delta; protein phosphatase 1-beta; OTTHUMP00000200968; OTTHUMP00000200967	Serine/threonine-protein phosphatase PP1-beta catalytic subunit	-0.7812	0.0095
153	A_72_P098786	MLL2/3 complex	11091	AC_000052;AC_000141;NC_000009;NM_017588;NM_052821;NP_060058;NP_438172;NT_035014;NW_001839242;NW_924573	AA490313;AAH01635;AAH01635.1;AC_000052;AC_000141;ADQ32719;AJ011376;AK000552;AK024484;AK025810;BAA91248;BAA91248.1;BAB15774;BC001635;BC015594;BC029769;BG773451;BX649632;CAB66159;CAB66159.1;CAI18774;CH471090;EAW88117;EAW88118;EAW88119;EAW88120;HQ448239;NC_000009;NM_017588;NM_052821;NP_060058;NP_438172;NT_035014;NW_001839242;NW_924573;P61964;Q9H7J6	P61964;Q91VA5;Q9NWX7;Q9UGP9	WDR5	WD repeat domain 5	WD repeat-containing protein 5; WD-repeat protein 5; OTTHUMP00000162494; SWD3, Set1c WD40 repeat protein, homolog; BMP2-induced 3-kb gene protein		0.1459	0.008471
154	A_72_P185236	MOCS3	27304	AC_000063;AC_000152;NC_000020;NG_008923;NM_014484;NP_055299;NT_011362;NW_001838666;NW_927339	AAC72412;AAC72412.1;AAH15939;AAH15939.1;ABM83281;ABM86472;AC_000063;AC_000152;AF102544;AL034553;BC015939;BG105185;CAB53750;CAB53750.1;CH471077;CR599749;DQ892355;DQ895546;EAW75606;NC_000020;NG_008923;NM_014484;NP_055299;NT_011362;NW_001838666;NW_927339;O95396	O95396	MOCS3	molybdenum cofactor synthesis 3	adenylyltransferase and sulfurtransferase MOCS3; ubiquitin-like modifier activating enzyme 4; UBA4, ubiquitin-activating enzyme E1 homolog; molybdopterin synthase sulfurylase; molybdenum cofactor synthesis protein 3; MPT synthase sulfurylase; OTTHUMP00000031284	Adenylyltransferase and sulfurtransferase MOCS3	-0.4032	0.006953
155	A_72_P127356	MRLC	103910	AC_000061;AC_000150;NC_000018;NM_001144944;NM_001144945;NM_033546;NP_001138416;NP_001138417;NP_291024;NT_010859;NW_001838461;NW_926940	AAA67367;AAA67367.1;AAH04994;AAH04994.1;AAP73808;AAP73808.1;AB046614;AC_000061;AC_000150;AK291726;AP005329;AV714583;AY320408;BAA23323;BAA23323.1;BAB62403.1;BAB88918;BAB88918.1;BAF84415;BAF84415.1;BC004994;BG696903;BG703257;CA307094;CH471113;CN302451;CR590117;CR594051;CR611530;CR613012;CR618334;CR620543;D50372;D82058;EAX01675;EAX01675.1;EAX01676;EAX01676.1;EAX01677;EAX01677.1;NC_000018;NM_00114494…	D3DUH6;O14950;Q13182;Q7Z5Z4	MYL12B	myosin, light chain 12B, regulatory	myosin regulatory light chain MRLC2; myosin regulatory light chain 2; myosin regulatory light chain 2-B, smooth muscle isoform; MLC-2; SHUJUN-1; MLC20; myosin regulatory light chain 12B; MLC-2A; OTTHUMP00000162244; OTTHUMP00000165806; OTTHUMP00000165808; OTTHUMP00000165807; myosin regulatory light chain 20 kDa		-0.3887	0.008254
156	A_72_P127356	MRLC2	103910	AC_000061;AC_000150;NC_000018;NM_001144944;NM_001144945;NM_033546;NP_001138416;NP_001138417;NP_291024;NT_010859;NW_001838461;NW_926940	AAA67367;AAA67367.1;AAH04994;AAH04994.1;AAP73808;AAP73808.1;AB046614;AC_000061;AC_000150;AK291726;AP005329;AV714583;AY320408;BAA23323;BAA23323.1;BAB62403.1;BAB88918;BAB88918.1;BAF84415;BAF84415.1;BC004994;BG696903;BG703257;CA307094;CH471113;CN302451;CR590117;CR594051;CR611530;CR613012;CR618334;CR620543;D50372;D82058;EAX01675;EAX01675.1;EAX01676;EAX01676.1;EAX01677;EAX01677.1;NC_000018;NM_00114494…	D3DUH6;O14950;Q13182;Q7Z5Z4	MYL12B	myosin, light chain 12B, regulatory	myosin regulatory light chain MRLC2; myosin regulatory light chain 2; myosin regulatory light chain 2-B, smooth muscle isoform; MLC-2; SHUJUN-1; MLC20; myosin regulatory light chain 12B; MLC-2A; OTTHUMP00000162244; OTTHUMP00000165806; OTTHUMP00000165808; OTTHUMP00000165807; myosin regulatory light chain 20 kDa	Myosin regulatory light chain 12B	-0.3887	0.008254
157	A_72_P397013	MRPL14	64928	AC_000049;AC_000138;NC_000006;NM_032111;NP_115487;NT_007592;NW_001838981;NW_923073	AA758781;AAH65005;AAH65005.1;AB051339;AC_000049;AC_000138;ADQ33133;AK312086;AL109615;AL365192;BAB54929;BAB54929.2;BAG35022;BAG35022.1;BC010416;BC065005;BM559405;BM910935;CAI19245;CAI19245.1;CH471081;CR625056;EAX04242;EAX04243;EAX04243.1;EAX04244;EAX04245;HQ448655;NC_000006;NM_032111;NP_115487;NT_007592;NW_001838981;NW_923073;Q6P1L8	B2R575;Q6P1L8;Q96Q72	MRPL14	mitochondrial ribosomal protein L14	OTTHUMP00000016500; 39S ribosomal protein L32, mitochondrial; 39S ribosomal protein L14, mitochondrial	39S ribosomal protein L14, mitochondrial	0.4779	0.001782
158	A_72_P368618	MTERF3	51001	AC_000051;AC_000140;NC_000008;NG_008237;NM_015942;NP_057026;NT_008046;NW_001839136;NW_923984	AAD27721;AAD27721.1;AAH12995;AAH12995.2;AC_000051;AC_000140;ADQ32770;AF132946;AK001801;AK309002;AP003465;BAG50978;BC012995;CH471060;CR590927;CR595557;CR609730;CR610912;EAW91750;EAW91751;EAW91752;HQ448290;NC_000008;NG_008237;NM_015942;NP_057026;NT_008046;NW_001839136;NW_923984;Q96E29	Q96E29;Q9Y301	MTERFD1	MTERF domain containing 1	mTERF domain-containing protein 1, mitochondrial; mitochondrial transcription termination factor 3; OTTHUMP00000227280; OTTHUMP00000227281; OTTHUMP00000227283	mTERF domain-containing protein 1, mitochondrial	0.4085	0.00368
159	A_72_P115606	MTFR1	9650	AC_000051;AC_000140;NC_000008;NM_001145838;NM_001145839;NM_014637;NP_001139310;NP_001139311;NP_055452;NT_008183;NW_001839132;NW_923929	AA015794;AAH36116;AAH36116.1;AAH43498;AAH43498.1;AC055822;AC_000051;AC_000140;ADQ33046;AK298945;AK304716;AK316202;AW157714;BAA02798;BAA02798.1;BAG61044;BAG65480;BAH14573;BC036116;BC043498;BX537854;BX647507;CAD97862;CAG33191;CAG33191.1;CH471068;CR456910;CR619027;CR621667;D13634;EAW86881;EAW86882;HQ448568;NC_000008;NM_001145838;NM_001145839;NM_014637;NP_001139310;NP_001139311;NP_055452;NT_008183;NW…	Q15390;Q6IB94;Q86XH5;Q8IVD7	MTFR1	mitochondrial fission regulator 1	OTTHUMP00000226769; OTTHUMP00000226772; OTTHUMP00000226764; chondrocyte protein with a poly-proline region	Mitochondrial fission regulator 1	-0.3489	0.001035
160	A_72_P428824	MUC1	4582	AC_000044;AC_000133;NC_000001;NG_029383;NM_001018016;NM_001018017;NM_001044390;NM_001044391;NM_001044392;NM_001044393;NM_001204285;NM_001204286;NM_001204287;NM_001204288;NM_001204289;NM_001204290;NM_001204291;NM_001204292;NM_001204293;NM_001204294;NM_001204295;NM_001204296;NM_001204297;NM_002456;NP_001018016;NP_001018017;NP_001037855;NP_001037856;NP_001037857;NP_001037858;NP_001191214;NP_00119121…	AA425062;AAA35757;AAA35757.1;AAA35804;AAA35804.1;AAA35805;AAA35805.1;AAA35806;AAA35806.1;AAA35807;AAA35807.1;AAA36336;AAA57348;AAA59874.1;AAA59876;AAA59876.1;AAA60019;AAA60019.1;AAB53150;AAB53150.1;AAB59612;AAB59612.1;AAD10856;AAD10856.1;AAD10857;AAD10857.1;AAD10858;AAD10858.1;AAD14369;AAD14369.1;AAD14376;AAD14376.1;AAD27842;AAD27842.1;AAI20975;AAI20976;AAK30142;AAK30142.1;AAP97013;AAP97013.1;AAP…	P13931;P15941;P15942;P17626;Q14128;Q14876;Q16437;Q16442;Q16615;Q7Z552;Q9BXA4;Q9UE75;Q9UE76;Q9UQL1;Q9Y4J2	MUC1	mucin 1, cell surface associated	breast carcinoma-associated antigen DF3; OTTHUMP00000033795; tumor-associated mucin; carcinoma-associated mucin; polymorphic epithelial mucin; mucin 1, transmembrane; H23 antigen; OTTHUMP00000033793; OTTHUMP00000033788; tumor-associated epithelial membrane antigen; tumor associated epithelial mucin; OTTHUMP00000033786; OTTHUMP00000033789; OTTHUMP00000033794; OTTHUMP00000033792; OTTHUMP00000033791…	Mucin-1	-0.316	0.0002457
161	A_72_P337159	MYH4	4622	AC_000060;AC_000149;NC_000017;NM_017533;NP_060003;NT_010718;NW_001838403;NW_926584	AAD29949;AAD29949.1;AAI56395;AAI57121;AC005323;AC_000060;AC_000149;AF111783;BC156394;BC157120;CAI61680;CS025606;NC_000017;NM_017533;NP_060003;NT_010718;NW_001838403;NW_926584;Q9Y623	Q9Y623	MYH4	myosin, heavy chain 4, skeletal muscle	myosin heavy chain, skeletal muscle, fetal; myosin heavy chain 4; myosin heavy chain 2b; myosin heavy chain IIb; myosin, heavy polypeptide 4, skeletal muscle; OTTHUMP00000160899; myosin-4	Myosin-4	0.8278	0.009772
162	A_72_P137466	Mi-2	1107	AC_000060;AC_000149;NC_000017;NM_001005271;NM_001005273;NM_005852;NP_001005271;NP_001005273;NP_005843;NT_010718;NW_001838403;NW_926584	AAB87383.1;AAC39923;AAC39923.1;AAC50228;AAC50228.1;AAI10649;AAI56473;AC104581;AC_000060;AC_000149;AF006515;AF064844;AK096555;AK125928;AK296725;AK296937;AK308362;BAG54266;BAG59313;BAG59488;BC110648;BC156472;BM554923;BX283837;CB851648;CH471108;EAW90114;EAW90114.1;EAW90115;EAW90116;EAW90116.1;NC_000017;NM_001005271;NM_001005273;NM_005852;NP_001005271;NP_001005273;NP_005843;NT_010718;NW_001838403;NW_…	D3DTQ9;Q12873;Q9Y4I0	CHD3	chromodomain helicase DNA binding protein 3	zinc finger helicase; mi-2 autoantigen 240 kDa protein; hZFH; chromodomain-helicase-DNA-binding protein 3; ATP-dependent helicase CHD3; OTTHUMP00000197336; zinc-finger helicase (Snf2-like); OTTHUMP00000197335; OTTHUMP00000197337; CHD-3		0.6589	0.007423
163	A_72_P137466	Mi-2 alpha	1107	AC_000060;AC_000149;NC_000017;NM_001005271;NM_001005273;NM_005852;NP_001005271;NP_001005273;NP_005843;NT_010718;NW_001838403;NW_926584	AAB87383.1;AAC39923;AAC39923.1;AAC50228;AAC50228.1;AAI10649;AAI56473;AC104581;AC_000060;AC_000149;AF006515;AF064844;AK096555;AK125928;AK296725;AK296937;AK308362;BAG54266;BAG59313;BAG59488;BC110648;BC156472;BM554923;BX283837;CB851648;CH471108;EAW90114;EAW90114.1;EAW90115;EAW90116;EAW90116.1;NC_000017;NM_001005271;NM_001005273;NM_005852;NP_001005271;NP_001005273;NP_005843;NT_010718;NW_001838403;NW_…	D3DTQ9;Q12873;Q9Y4I0	CHD3	chromodomain helicase DNA binding protein 3	zinc finger helicase; mi-2 autoantigen 240 kDa protein; hZFH; chromodomain-helicase-DNA-binding protein 3; ATP-dependent helicase CHD3; OTTHUMP00000197336; zinc-finger helicase (Snf2-like); OTTHUMP00000197335; OTTHUMP00000197337; CHD-3	Chromodomain-helicase-DNA-binding protein 3	0.6589	0.007423
164	A_72_P419409	Mig-2	10979	AC_000057;AC_000146;NC_000014;NM_001134999;NM_001135000;NM_006832;NP_001128471;NP_001128472;NP_006823;NT_026437;NW_001838111;NW_925561	AAH17327;AAH17327.1;AAN75823;AAN75823.1;ACE86749;ACE87435;ACH73257;AC_000057;AC_000146;AF443279;AK126426;AK291738;AL139317;AL352979;BAF84427;BC011125;BC017327;BX161467;CAA80852;CAA80852.1;CAD61925;CAD61925.1;CH471061;CR624174;CR749486;EAW80618;EAW80619;EAW80620;EU831994;EU832087;EU979385;NC_000014;NM_001134999;NM_001135000;NM_006832;NP_001128471;NP_001128472;NP_006823;NT_026437;NW_001838111;NW_92…	Q14840;Q86TY7;Q96AC1	FERMT2	fermitin family member 2	kindlin-2; pleckstrin homology domain-containing family C member 1; kindlin 2; mitogen-inducible gene 2 protein; fermitin family homolog 2 (Drosophila); PH domain-containing family C member 1; OTTHUMP00000179005; pleckstrin homology domain containing, family C (with FERM domain) member 1; fermitin family homolog 2; mitogen inducible gene 2 protein; OTTHUMP00000179004; pleckstrin homology domain c…	Fermitin family homolog 2	0.467	0.003018
165	A_72_P337159	MyHC	4622	AC_000060;AC_000149;NC_000017;NM_017533;NP_060003;NT_010718;NW_001838403;NW_926584	AAD29949;AAD29949.1;AAI56395;AAI57121;AC005323;AC_000060;AC_000149;AF111783;BC156394;BC157120;CAI61680;CS025606;NC_000017;NM_017533;NP_060003;NT_010718;NW_001838403;NW_926584;Q9Y623	Q9Y623	MYH4	myosin, heavy chain 4, skeletal muscle	myosin heavy chain, skeletal muscle, fetal; myosin heavy chain 4; myosin heavy chain 2b; myosin heavy chain IIb; myosin, heavy polypeptide 4, skeletal muscle; OTTHUMP00000160899; myosin-4		0.8278	0.009772
166	A_72_P061546	Myoferlin	26509	AC_000053;AC_000142;NC_000010;NM_013451;NM_133337;NP_038479;NP_579899;NT_030059;NW_001838005;NW_924884	AAF27176;AAF27176.1;AAF27177.1;AAG23737;AAG23737.1;AAH40110;AAH40110.1;AAH52617;AAH52617.1;AB033033;AC_000053;AC_000142;AF182316;AF182317;AF207990;AK075258;AK093890;AL096713;AL360229;AL365364;BAA86521;BAA86521.2;BAG52097;BAG52097.1;BAG52779;BC014612;BC033616;BC040110;BC052617;CAB46370;CAB46370.1;CAH72370;CAH72370.1;CAH72371;CAH72371.2;CAH72372;CAH72372.2;CAH72373;CAH72373.1;CAI41206;CAI41206.2;CA…	B3KQN5;Q5VWW2;Q5VWW3;Q5VWW4;Q5VWW5;Q7Z642;Q8IWH0;Q9HBU3;Q9NZM0;Q9NZM1;Q9ULL3;Q9Y4U4	MYOF	myoferlin	fer-1-like 3, myoferlin; fer-1-like protein 3; fer-1 (C.elegans)-like 3 (myoferlin); fer-1-like 3, myoferlin (C. elegans); OTTHUMP00000020112; OTTHUMP00000020111	Myoferlin	-0.4294	0.002245
167	A_72_P337159	Myosin II	4622	AC_000060;AC_000149;NC_000017;NM_017533;NP_060003;NT_010718;NW_001838403;NW_926584	AAD29949;AAD29949.1;AAI56395;AAI57121;AC005323;AC_000060;AC_000149;AF111783;BC156394;BC157120;CAI61680;CS025606;NC_000017;NM_017533;NP_060003;NT_010718;NW_001838403;NW_926584;Q9Y623	Q9Y623	MYH4	myosin, heavy chain 4, skeletal muscle	myosin heavy chain, skeletal muscle, fetal; myosin heavy chain 4; myosin heavy chain 2b; myosin heavy chain IIb; myosin, heavy polypeptide 4, skeletal muscle; OTTHUMP00000160899; myosin-4		0.8278	0.009772
168	A_72_P127356	Myosin II	103910	AC_000061;AC_000150;NC_000018;NM_001144944;NM_001144945;NM_033546;NP_001138416;NP_001138417;NP_291024;NT_010859;NW_001838461;NW_926940	AAA67367;AAA67367.1;AAH04994;AAH04994.1;AAP73808;AAP73808.1;AB046614;AC_000061;AC_000150;AK291726;AP005329;AV714583;AY320408;BAA23323;BAA23323.1;BAB62403.1;BAB88918;BAB88918.1;BAF84415;BAF84415.1;BC004994;BG696903;BG703257;CA307094;CH471113;CN302451;CR590117;CR594051;CR611530;CR613012;CR618334;CR620543;D50372;D82058;EAX01675;EAX01675.1;EAX01676;EAX01676.1;EAX01677;EAX01677.1;NC_000018;NM_00114494…	D3DUH6;O14950;Q13182;Q7Z5Z4	MYL12B	myosin, light chain 12B, regulatory	myosin regulatory light chain MRLC2; myosin regulatory light chain 2; myosin regulatory light chain 2-B, smooth muscle isoform; MLC-2; SHUJUN-1; MLC20; myosin regulatory light chain 12B; MLC-2A; OTTHUMP00000162244; OTTHUMP00000165806; OTTHUMP00000165808; OTTHUMP00000165807; myosin regulatory light chain 20 kDa		-0.3887	0.008254
169	A_72_P322628	Myospryn	202333	AC_000048;AC_000137;NC_000005;NM_153610;NP_705838;NT_006713;NW_001838951;NW_922729	AAD55265;AAD55265.1;AAH20856;AAH20856.1;AAH22422;AAH22422.1;AAH62664;AAH62664.1;AAH63134;AAH63134.1;AAI11530;AAI11530.1;AAI11531;AAI11531.1;AAQ09018;AAQ09018.1;AC008482;AC008496;AC026779;AC109488;AC_000048;AC_000137;AF177292;AF533705;AK092699;AK096453;AK123466;AL359338;AL831966;AL831968;AL831986;AL832021;AL832347;AL832368;AL832376;AL834252;BC020856;BC022422;BC022430;BC029434;BC046215;BC062664;BC0…	A0PJB7;Q05CT4;Q2NKX1;Q2T9G9;Q69YQ8;Q69YQ9;Q6P517;Q6P5U3;Q7Z4I1;Q86T34;Q86T49;Q8N3K9;Q8N3S4;Q8N3S7;Q8NAG8;Q9UK88	CMYA5	cardiomyopathy associated 5	2310076E16Rik; OTTHUMP00000222299; dystrobrevin-binding protein 2; SPRY domain-containing protein 2; cardiomyopathy-associated protein 5; chromosome 5 open reading frame 10; tripartite motif-containing protein 76; tripartite motif-containing 76; myospryn; genethonin-3	Cardiomyopathy-associated protein 5	0.8821	0.002127
170	A_72_P240232;A_72_P433219	N-glycanase 1	55768	AC_000046;AC_000135;NC_000003;NM_001145293;NM_001145294;NM_001145295;NM_018297;NP_001138765;NP_001138766;NP_001138767;NP_060767;NT_022517;NW_001838877;NW_921651	AAF74720;AAF74720.2;AAH00963;AAH00963.1;AAH07226;AAH07226.1;AAH17220;AAH17220.1;AB209549;ABM84435;ABM87500;AC092798;AC_000046;AC_000135;AF250924;AK001867;AK022471;AK296047;AK310473;AL832748;BAA91950;BAD92786;BAD92786.1;BAG58811;BC000963;BC007226;BC017220;BQ017148;CH471055;CR611129;CR617659;DC329733;DQ893509;DQ896501;EAW64363;EAW64364;EAW64365;EAW64366;NC_000003;NM_001145293;NM_001145294;NM_001145…	Q59FB1;Q6PJD8;Q96IV0;Q9BVR8;Q9NR70	NGLY1	N-glycanase 1	peptide-N(4)-(N-acetyl-beta-glucosaminyl)asparagine amidase; hPNGase; peptide:N-glycanase; OTTHUMP00000208321; OTTHUMP00000208322; OTTHUMP00000208323; OTTHUMP00000208320	Peptide-N(4)-(N-acetyl-beta-glucosaminyl)asparagine amidase	-0.6601	0.007651
171	A_72_P320103	NARG1L	79612	AC_000056;AC_000145;NC_000013;NM_001110798;NM_018527;NM_024561;NP_001104268;NP_060997;NP_078837;NT_024524;NW_001838073;NW_925473	AAH17099;AAH28112;AAH32318;AAH32318.1;AAH64592;AAH64592.1;AAI01720;AAI01722;AC_000056;AC_000145;ADQ32355;AK025707;AK097224;AK291248;AL354696;AL590665;AL731858;AL833341;BAB15222;BAF83937;BC017099;BC028112;BC032318;BC064592;BC101719;BC101721;BC143506;BE501152;BX640665;CAE45801;CAE45801.1;CAH71511;CAH71511.1;CAH73370;CAH73370.1;CAI16619;CAI16619.1;CAQ06902;CAQ06902.1;CAQ09847;CAQ09847.1;CH471075;DB0…	B0QZ59;Q5VSP9;Q6N069;Q6P2D5;Q8N5J3;Q8N870	NAA16	N(alpha)-acetyltransferase 16, NatA auxiliary subunit	NARG1-like protein; NMDA receptor-regulated 1-like protein; OTTHUMP00000198977; NMDA receptor regulated 1-like; OTTHUMP00000018318; N-alpha-acetyltransferase 16, NatA auxiliary subunit; OTTHUMP00000018320	N-alpha-acetyltransferase 16, NatA auxiliary subunit	-0.4493	0.002405
172	A_72_P229747	NKTR	4820	AC_000046;AC_000135;NC_000003;NM_005385;NP_005376;NT_022517;NW_001838877;NW_921651	AA493639;AAA35734;AAA35734.2;AAB28499;AAD56402;AAD56402.1;AAI67775;AB209888;AC006059;AC092047;AC_000046;AC_000135;AF184110;AK097208;AK126234;AK292017;BAD93125;BAF84706;BC020672;BC035644;BC051318;BC072680;BC144518;BC167775;BU632018;BX538094;BX640751;BX641127;BX957215;BX957218;CAE45859;CAE46057;CAF29506;CAF29508;CAH18257;CAH18366;CH471055;CR749415;CR749571;EAW64659;EAW64660;EAW64661;L04288;NC_00000…	P30414	NKTR	natural killer-tumor recognition sequence	natural killer triggering receptor; natural-killer cells cyclophilin-related protein; NK-tumor recognition protein; NK-TR protein; OTTHUMP00000164031	NK-tumor recognition protein	0.5371	0.00108
173	A_72_P049716	NOLA2 (NHP2)	55651	AC_000048;AC_000137;NC_000005;NG_011765;NM_001034833;NM_017838;NP_001030005;NP_060308;NT_023133;NW_001838967;NW_922818	AAF28964;AAF28964.1;AAH00009;AAH00009.1;AAH06387;AAH06387.1;AAL02173;AAL02175;AAL02175.1;AC136632;AC_000048;AC_000137;AF161404;AF401217;AF401219;AJ293309;AK000486;BAA91198;BAA91198.1;BC000009;BC006387;BE797477;BG827491;BM913344;CAC08452;CAC08452.1;CAG33519;CAG33519.1;CH471165;CR457238;CR612055;EAW53848;NC_000005;NG_011765;NM_001034833;NM_017838;NP_001030005;NP_060308;NT_023133;NW_001838967;NW_922…	A6NKY8;Q9NX24;Q9P095	NHP2	NHP2 ribonucleoprotein homolog (yeast)	snoRNP protein NHP2; nucleolar protein family A member 2; nucleolar protein family A, member 2 (H/ACA small nucleolar RNPs); OTTHUMP00000161486; OTTHUMP00000223997; NHP2-like protein; H/ACA ribonucleoprotein complex subunit 2; OTTHUMP00000223998; OTTHUMP00000223999	H/ACA ribonucleoprotein complex subunit 2	0.2945	0.0003626
174	A_72_P069591	NOV	4856	AC_000051;AC_000140;NC_000008;NG_009779;NM_002514;NP_002505;NT_008046;NW_001839136;NW_923984	AAH15028;AAH15028.1;AAL92490;AAL92490.1;ABM82105;ABM85287;AC021733;AC_000051;AC_000140;AK294289;AK312355;AY082381;BAG35274;BAG35274.1;BAG57572;BC015028;CAA55146;CAA55146.1;CAA65403;CAA65403.1;CAG33713;CAG33713.1;CAI58925;CH471060;CR457432;CR591257;CR623165;CS021388;DA162276;DQ891179;DQ894361;EAW91984;EAW91985;NC_000008;NG_009779;NM_002514;NP_002505;NT_008046;NW_001839136;NW_923984;P48745;X78351;X…	B2R5X7;P48745;Q6I9S3;Q96BY5;Q9UDE4	NOV	nephroblastoma overexpressed gene	CCN family member 3; protein NOV homolog; novH; IGFBP-9; nephroblastoma-overexpressed gene protein homolog; IGF-binding protein 9; insulin-like growth factor-binding protein 9; OTTHUMP00000228107; IBP-9	Protein NOV homolog	-0.7577	0.001993
175	A_72_P229977;A_72_P055361	NRF2	4780	AC_000045;AC_000134;NC_000002;NM_001145412;NM_001145413;NM_006164;NP_001138884;NP_001138885;NP_006155;NT_005403;NW_001838863;NW_921585	AAB32188;AAB32188.1;AAH11558;AAH11558.1;AAK01657;AAY14710;AAY14710.1;AB208786;ABZ92168;AC079305;ACE86746;ACE87432;ACE87835;ACT64362;AC_000045;AC_000134;ADK56055;AF323119;AK297838;AK304555;AK310656;AK310841;AK311395;AK311688;AK314816;AK316148;AL135266;BAD92023;BAD92023.1;BAG37339;BAG37339.1;BAG60172;BAG65350;BAH14519;BC011558;BX649047;BX649071;CH471058;CR619801;CV575212;DA436387;DC314553;EAX11061;…	B2RBU2;Q16236;Q53RW6;Q59HH2;Q96F71	NFE2L2	nuclear factor (erythroid-derived 2)-like 2	OTTHUMP00000164989; nuclear factor, erythroid derived 2, like 2; NFE2-related factor 2; nuclear factor erythroid 2-related factor 2; HEBP1; OTTHUMP00000205251; OTTHUMP00000207980; nuclear factor erythroid-derived 2-like 2; OTTHUMP00000164988; NF-E2-related factor 2; OTTHUMP00000205250	Nuclear factor erythroid 2-related factor 2	-0.5782	0.00424
176	A_72_P286974	NS4ATP2	79685	AC_000048;AC_000137;NC_000005;NM_001131062;NM_001131063;NM_024632;NP_001124534;NP_001124535;NP_078908;NR_024084;NT_029289;NW_001838953;NW_922784	AAH09829;AAH09829.1;AAQ16562;AAQ16562.1;AAX54477;AAX54477.1;AC008625;AC026688;AC_000048;AC_000137;ADZ15848;AF085957;AF157115;AF157116;AI144341;AI199517;AI436556;AK021588;AK027248;AK093816;AL833219;AL833381;AW874393;AY341060;AY846876;BAB13848;BAB13848.1;BC009829;CH471062;EAW61637;EAW61637.1;JF432631;NC_000005;NM_001131062;NM_001131063;NM_024632;NP_001124534;NP_001124535;NP_078908;NR_024084;NT_0292…	Q9HAJ7	SAP30L	SAP30-like	OTTHUMP00000224331; OTTHUMP00000224330; HCV non-structural protein 4A-transactivated protein 2; sin3 corepressor complex subunit SAP30L; histone deacetylase complex subunit SAP30L; OTTHUMP00000160641; Sin3A associated protein p30-like; sin3-associated protein p30-like	Histone deacetylase complex subunit SAP30L	0.2379	0.0005686
177	A_72_P321703;A_72_P298164	NUD12	83594	AC_000048;AC_000137;NC_000005;NM_031438;NP_113626;NT_034772;NW_001838952;NW_922751	AAH26748;AAH26748.1;AAH41099;AAH41099.1;AC008519;AC_000048;AC_000137;AK098066;AK304010;AK309942;AL136592;AM392531;BAG53574;BAG53574.1;BAG64925;BC026748;BC041099;BC042967;BU621954;CAB66527;CAB66527.1;CAL37409;CB131118;CH471086;EAW49073;EAW49073.1;NC_000005;NM_031438;NP_113626;NT_034772;NW_001838952;NW_922751;Q9BQG2	B3KUW2;Q8TAL7;Q9BQG2	NUDT12	nudix (nucleoside diphosphate linked moiety X)-type motif 12	peroxisomal NADH pyrophosphatase NUDT12; nucleoside diphosphate-linked moiety X motif 12; OTTHUMP00000222655; OTTHUMP00000158933; nucleoside diphosphate linked moiety X-type motif 12; nudix motif 12	Peroxisomal NADH pyrophosphatase NUDT12	-0.6266	0.00179
178	A_72_P416293	Nectin-2	5819	AC_000062;AC_000151;NC_000019;NG_029149;NM_001042724;NM_002856;NP_001036189;NP_002847;NT_011109;NW_001838496;NW_927217	AAC23797;AAC23797.1;AAC82347;AAC82348;AAC82348.1;AAD02503;AAD02503.1;AAH03091;AAH03091.1;AAQ19176;AAQ19177;AAQ19178;ABM82755;ABM85941;AC011481;AC093232;AC_000062;AC_000151;AF044962;AF044963;AF044964;AF044965;AF044966;AF044967;AF044968;AF050154;AF058448;AJ708439;AK291330;AY331689;AY331691;AY331694;BAF84019;BC003091;BQ549399;CAA56342;CAA56342.1;CAG33099;CAG33099.1;CH471126;CN359643;CN410857;CR45681…	O75455;Q6IBI6;Q92692;Q96J29	PVRL2	poliovirus receptor-related 2 (herpesvirus entry mediator B)	nectin-2; poliovirus receptor-related protein 2; herpesvirus entry protein B; poliovirus receptor-like 2	Poliovirus receptor-related protein 2	0.3447	0.0002612
179	A_72_P239802;A_72_P400093	Nesprin 1	23345	AC_000049;AC_000138;NC_000006;NG_012855;NM_015293;NM_033071;NM_133650;NM_182961;NP_056108;NP_149062;NP_598411;NP_892006;NT_025741;NW_001838990;NW_923184	AAC02992;AAC02992.2;AAH39121;AAH90927;AAI50290;AAL33798;AAL33798.1;AAL33799;AAL33799.1;AAL38031;AAL38031.1;AAM95335;AAM95335.1;AAN03486;AAN03486.1;AAN60442;AAN60442.1;AAO23669;AAO23669.1;AAO27771;AAO27771.1;AAO27774;AAO27774.1;AB018339;AB033088;AB051543;AC_000049;AC_000138;AF043290;AF444779;AF495910;AF535142;AK055440;AK056122;AK057959;AK091651;AK094094;AK122691;AK123135;AK127076;AK304825;AK308717…	O94890;Q5JV19;Q5JV22;Q8N9P7;Q8NF91;Q8TCP1;Q8WWW6;Q8WWW7;Q8WXF6;Q96N17;Q9C0A7;Q9H525;Q9H526;Q9NS36;Q9NU50;Q9UJ06;Q9UJ07;Q9ULF8	SYNE1	spectrin repeat containing, nuclear envelope 1	synaptic nuclei expressed gene 1; chromosome 6 open reading frame 98; nesprin-1; synaptic nuclear envelope protein 1; myocyte nuclear envelope protein 1; nesprin 1; enaptin; OTTHUMP00000205471; OTTHUMP00000017440; OTTHUMP00000017441; OTTHUMP00000237449	Nesprin-1	0.4879	0.001846
180	A_72_P228307	Neurabin-1	55607	AC_000050;AC_000068;AC_000139;NC_000007;NG_008779;NG_015803;NM_001166160;NM_001166161;NM_001166162;NM_001166163;NM_017650;NP_001159632;NP_001159633;NP_001159634;NP_001159635;NP_060120;NT_007933;NT_079595;NW_001839064;NW_923574	AAC35294;AAC35294.2;AAI30450;AAI44110;AAI50637;AB033048;AC002429;AC004022;AC073886;AC073890;AC_000050;AC_000068;AC_000139;AK000075;AK096514;AK225204;BAA86536;BAA86536.1;BAA90928;BAA90928.1;BC037849;BC130449;BC144108;BC144109;BC150636;CH236949;CH471091;DA497168;EAL24134;EAW76776;NC_000007;NG_008779;NG_015803;NM_001166160;NM_001166161;NM_001166162;NM_001166163;NM_017650;NP_001159632;NP_001159633;NP…	O76059;Q9NXT2;Q9ULJ8	PPP1R9A	protein phosphatase 1, regulatory (inhibitor) subunit 9A	protein phosphatase 1 regulatory subunit 9A; neurabin-1; neural tissue-specific F-actin-binding protein I; OTTHUMP00000208242; OTTHUMP00000208241; OTTHUMP00000208240	Neurabin-1	0.3935	0.006536
181	A_72_P352758	Nicastrin	23385	AC_000044;AC_000133;NC_000001;NG_027935;NM_015331;NP_056146;NT_004487;NW_001838531;NW_925683	AAG11412;AAG11412.1;AAH47621;AAH47621.1;AAQ89478;AAQ89478.1;AC_000044;AC_000133;ADZ15586;AF240468;AK296153;AK299142;AK310741;AK314764;AL445230;AY359120;BAA13383;BAA13383.1;BAG37302;BAG58892;BAG61194;BC047621;BC100024;CAI15006;CAI15007;CAI15008;CAI15009;CAI15010;CAI15010.1;CAI15011;CAI15012;CAI15013;CH471121;CN429672;CR596089;CR605263;D87442;EAW52720;EAW52721;EAW52722;EAW52722.1;JF432369;NC_000001…	Q5T207;Q86VV5;Q92542	NCSTN	nicastrin	anterior pharynx-defective 2; OTTHUMP00000031840; ATAG1874; OTTHUMP00000031839	Nicastrin	0.2601	0.005156
182	A_72_P348703	Nidogen	4811	AC_000044;AC_000133;NC_000001;NM_002508;NP_002499;NT_167186;NW_001838549;NW_927128	AAA57261;AAA57261.1;AAA59932;AAA59932.1;AAH45606;AAH45606.1;AB209448;AC_000044;AC_000133;AK297234;AL122018;AL139161;BAD92685;BAD92685.1;BAG59717;BC012501;BC045606;BQ549657;CAA57709;CAA57709.1;CAI22680;CAI22680.1;CAI22681;CAI22681.1;CAI23421;CAI23421.1;CAI23422;CAI23422.1;CH471098;CN267119;CR590230;CR609449;CR611614;DA269707;DN999415;EAW70039;EAW70040;EAW70041;M27445;M30269;NC_000001;NM_002508;NP_…	P14543;Q14942;Q59FL2;Q5TAF2;Q5TAF3;Q86XD7	NID1	nidogen 1	entactin; nidogen (enactin); enactin; OTTHUMP00000038291; OTTHUMP00000037970; NID-1; nidogen-1	Nidogen-1	-0.5627	0.009847
183	A_72_P272714	Nucleolysin TIAR	7073	AC_000053;AC_000142;NC_000010;NG_029240;NM_001033925;NM_003252;NP_001029097;NP_003243;NT_030059;NW_001838006;NW_924884	AA972022;AAA36384;AAA36384.1;AAH30025;AAV33303;AB209260;AC012468;AC_000053;AC_000142;AK125264;AK290695;AK290984;AK291239;AK295243;AL833106;AW129760;AY633610;BAA21559;BAD92497;BAF83384;BAF83384.1;BAF83673;BAF83928;BAG58235;BC030025;BC128140;BC128141;CH471066;CR609669;CR621940;D64015;EAW49385;EAW49386;EAW49387;EAW49388;M96954;NC_000010;NG_029240;NM_001033925;NM_003252;NP_001029097;NP_003243;NT_0300…	A8K3T0;Q01085	TIAL1	TIA1 cytotoxic granule-associated RNA binding protein-like 1	aging-associated gene 7 protein; TIA1 cytotoxic granule-associated RNA-binding protein-like 1; OTTHUMP00000020602; T-cluster binding protein; OTTHUMP00000020605; TIA-1-related nucleolysin; nucleolysin TIAR	Nucleolysin TIAR	0.2474	0.001659
184	A_72_P213567	P2Y6	5031	AC_000054;AC_000143;NC_000011;NM_004154;NM_176796;NM_176797;NM_176798;NP_004145;NP_789766;NP_789767;NP_789768;NT_167190;NW_001838028;NW_925106	AAB03572;AAB03572.1;AAB80712;AAB80712.1;AAB80713;AAB80713.1;AAG17247;AAG17247.1;AAH00571;AAH00571.1;AAH09391;AAH09391.1;AAM18129;AAM18129.1;AAP35417;AAP35417.1;ABM81686;ABM84534;ABM86072;AC_000054;AC_000143;AF007891;AF007892;AF007893;AF218005;AF498920;AL520218;AP002761;BC000571;BC009391;BT006771;CAA65770;CAA65770.1;CH471076;CR597500;CR598708;CR598765;CR605588;CR606834;CR612681;CR614658;CR617080;C…	Q15077;Q15754	P2RY6	pyrimidinergic receptor P2Y, G-protein coupled, 6	G-coupled nucleotide receptor; OTTHUMP00000237502; OTTHUMP00000237501; OTTHUMP00000237506; OTTHUMP00000237497; OTTHUMP00000237500; OTTHUMP00000237505; P2Y6 receptor; OTTHUMP00000237504; P2Y purinoceptor 6; P2 purinoceptor	P2Y purinoceptor 6	0.6843	0.0001761
185	A_72_P184041	P4HA	5033	AC_000053;AC_000142;NC_000010;NM_000917;NM_001017962;NM_001142595;NM_001142596;NP_000908;NP_001017962;NP_001136067;NP_001136068;NT_030059;NW_001837987;NW_924796	AA780802;AAA36534;AAA36534.1;AAA36535;AAA36535.1;AAA59068;AAA59068.1;AAA59069;AAA59069.1;AAH34998;AAH34998.1;ABM82595;ABM85781;AC_000053;AC_000142;AI061083;AK222960;AK312593;AL702003;AL731563;BAD96680;BC034998;CAH72753;CAH72754;CAH72754.1;CD013929;CD013930;CH471083;CR590114;DB030709;DQ891669;DQ894855;EAW54467;EAW54468;EAW54469;EAW54470;M24486;M24487;NC_000010;NM_000917;NM_001017962;NM_001142595;N…	P13674;Q15082;Q15083;Q5VSQ5	P4HA1	prolyl 4-hydroxylase, alpha polypeptide I	C-P4Halpha(I); collagen prolyl 4-hydroxylase alpha(I); procollagen-proline,2-oxoglutarate-4-dioxygenase subunit alpha-1; prolyl 4-hydroxylase subunit alpha-1; OTTHUMP00000019794; procollagen-proline, 2-oxoglutarate 4-dioxygenase (proline 4-hydroxylase), alpha polypeptide I; OTTHUMP00000019793		-0.5121	0.005446
186	A_72_P184041	P4HA	8974	AC_000048;AC_000137;NC_000005;NM_001017973;NM_001017974;NM_001142598;NM_001142599;NM_004199;NP_001017973;NP_001017974;NP_001136070;NP_001136071;NP_004190;NT_034772;NW_001838952;NW_922784	AAB71339;AAB71339.1;AAH17062;AAH35813;AAH35813.1;AAQ89329;AAQ89329.1;ABM83357;ABW03320;AC034220;AC063976;AC_000048;AC_000137;AJ314859;AU117989;AY358970;BC017062;BC025960;BC035813;BI758477;BX647924;CAC85688;CAC85688.1;CAC85689;CAC85689.1;CAI46066;CH471062;DA544450;DQ892431;EAW62341;EAW62341.1;EAW62342;EAW62342.1;EAW62343;EAW62343.1;EAW62344;EAW62345;EAW62346;EAW62346.1;EAW62347;EAW62348;EU176519;N…	D3DQ85;D3DQ86;O15460;Q8WWN0	P4HA2	prolyl 4-hydroxylase, alpha polypeptide II	C-P4Halpha(II); collagen prolyl 4-hydroxylase alpha(II); OTTHUMP00000065966; procollagen-proline,2-oxoglutarate-4-dioxygenase subunit alpha-2; 4-PH alpha-2; prolyl 4-hydroxylase subunit alpha-2; procollagen-proline, 2-oxoglutarate 4-dioxygenase (proline 4-hydroxylase), alpha polypeptide II; OTTHUMP00000065969; OTTHUMP00000065967; 4-PH alpha 2; OTTHUMP00000065968		-0.5121	0.005446
187	A_72_P184041	P4HA1	5033	AC_000053;AC_000142;NC_000010;NM_000917;NM_001017962;NM_001142595;NM_001142596;NP_000908;NP_001017962;NP_001136067;NP_001136068;NT_030059;NW_001837987;NW_924796	AA780802;AAA36534;AAA36534.1;AAA36535;AAA36535.1;AAA59068;AAA59068.1;AAA59069;AAA59069.1;AAH34998;AAH34998.1;ABM82595;ABM85781;AC_000053;AC_000142;AI061083;AK222960;AK312593;AL702003;AL731563;BAD96680;BC034998;CAH72753;CAH72754;CAH72754.1;CD013929;CD013930;CH471083;CR590114;DB030709;DQ891669;DQ894855;EAW54467;EAW54468;EAW54469;EAW54470;M24486;M24487;NC_000010;NM_000917;NM_001017962;NM_001142595;N…	P13674;Q15082;Q15083;Q5VSQ5	P4HA1	prolyl 4-hydroxylase, alpha polypeptide I	C-P4Halpha(I); collagen prolyl 4-hydroxylase alpha(I); procollagen-proline,2-oxoglutarate-4-dioxygenase subunit alpha-1; prolyl 4-hydroxylase subunit alpha-1; OTTHUMP00000019794; procollagen-proline, 2-oxoglutarate 4-dioxygenase (proline 4-hydroxylase), alpha polypeptide I; OTTHUMP00000019793	Prolyl 4-hydroxylase subunit alpha-1	-0.5121	0.005446
188	A_72_P184041	P4HA2	8974	AC_000048;AC_000137;NC_000005;NM_001017973;NM_001017974;NM_001142598;NM_001142599;NM_004199;NP_001017973;NP_001017974;NP_001136070;NP_001136071;NP_004190;NT_034772;NW_001838952;NW_922784	AAB71339;AAB71339.1;AAH17062;AAH35813;AAH35813.1;AAQ89329;AAQ89329.1;ABM83357;ABW03320;AC034220;AC063976;AC_000048;AC_000137;AJ314859;AU117989;AY358970;BC017062;BC025960;BC035813;BI758477;BX647924;CAC85688;CAC85688.1;CAC85689;CAC85689.1;CAI46066;CH471062;DA544450;DQ892431;EAW62341;EAW62341.1;EAW62342;EAW62342.1;EAW62343;EAW62343.1;EAW62344;EAW62345;EAW62346;EAW62346.1;EAW62347;EAW62348;EU176519;N…	D3DQ85;D3DQ86;O15460;Q8WWN0	P4HA2	prolyl 4-hydroxylase, alpha polypeptide II	C-P4Halpha(II); collagen prolyl 4-hydroxylase alpha(II); OTTHUMP00000065966; procollagen-proline,2-oxoglutarate-4-dioxygenase subunit alpha-2; 4-PH alpha-2; prolyl 4-hydroxylase subunit alpha-2; procollagen-proline, 2-oxoglutarate 4-dioxygenase (proline 4-hydroxylase), alpha polypeptide II; OTTHUMP00000065969; OTTHUMP00000065967; 4-PH alpha 2; OTTHUMP00000065968	Prolyl 4-hydroxylase subunit alpha-2	-0.5121	0.005446
189	A_72_P229287	PAF complex	54623	AC_000062;AC_000151;NC_000019;NM_019088;NP_061961;NT_011109;NW_001838496;NW_927217	AAC25503;AAC25503.1;AAH00017;AAH00017.1;AAH13402;AAH13402.1;ABM82765;ABM85952;AC005239;AC_000062;AC_000151;AF086555;AJ401156;AK001985;AK098423;AK294625;BAA92020;BAA92020.1;BAC05305;BAC05305.1;BAG57806;BC000017;BC013402;CAC20564;CAC20564.1;CH471126;CR599585;CR604612;CR604698;CR616137;DQ891839;DQ895026;EAW56880;EAW56880.1;EAW56881;EAW56881.1;EAW56882;EAW56883;NC_000019;NM_019088;NP_061961;NT_011109…	O75239;Q8N7H5;Q9H166;Q9NUU9	PAF1	Paf1, RNA polymerase II associated factor, homolog (S. cerevisiae)	hPAF1; pancreatic differentiation protein 2; RNA polymerase II-associated factor 1 homolog		0.4059	0.00727
190	A_72_P229287	PAF1	54623	AC_000062;AC_000151;NC_000019;NM_019088;NP_061961;NT_011109;NW_001838496;NW_927217	AAC25503;AAC25503.1;AAH00017;AAH00017.1;AAH13402;AAH13402.1;ABM82765;ABM85952;AC005239;AC_000062;AC_000151;AF086555;AJ401156;AK001985;AK098423;AK294625;BAA92020;BAA92020.1;BAC05305;BAC05305.1;BAG57806;BC000017;BC013402;CAC20564;CAC20564.1;CH471126;CR599585;CR604612;CR604698;CR616137;DQ891839;DQ895026;EAW56880;EAW56880.1;EAW56881;EAW56881.1;EAW56882;EAW56883;NC_000019;NM_019088;NP_061961;NT_011109…	O75239;Q8N7H5;Q9H166;Q9NUU9	PAF1	Paf1, RNA polymerase II associated factor, homolog (S. cerevisiae)	hPAF1; pancreatic differentiation protein 2; RNA polymerase II-associated factor 1 homolog	RNA polymerase II-associated factor 1 homolog	0.4059	0.00727
191	A_72_P177621	PAQR7	164091	AC_000044;AC_000133;NC_000001;NM_178422;NP_848509;NT_004610;NW_001838576;NW_921351	AA778580;AAH34015;AAH34015.1;AAI27801;AAO47233;AAO47233.1;AAR08373;AAR08373.1;AC_000044;AC_000133;ADQ31948;AF313620;AL033528;AY424285;BC034015;BC042298;BC127800;CA434186;CAM12867;CAM12867.1;CH471059;EAX07862;EAX07862.1;HQ447462;NC_000001;NM_178422;NP_848509;NT_004610;NW_001838576;NW_921351;Q86WK9	A2A2D3;Q5XKF9;Q86VE4;Q86WK9	PAQR7	progestin and adipoQ receptor family member VII	progestin and adipoQ receptor family member 7; membrane progestin receptor alpha; mPR alpha; OTTHUMP00000008505; 2310021M12Rik	Membrane progestin receptor alpha	0.3974	0.00406
192	A_72_P069846	PCAF histone acetylase complex	6880	AC_000048;AC_000137;NC_000005;NM_001015891;NM_001015892;NM_003187;NM_016283;NP_001015891;NP_001015892;NP_003178;NP_057367;NT_006713;NW_001838935;NW_003315917;NW_922618	AAA84389;AAA84389.1;AAA91318;AAA91318.1;AAC50153;AAC50153.1;AAD34132;AAD34132.1;AAF14860;AAF14860.1;AAH03400;AAH03400.1;AAH07349;AAH07349.1;AAH07426;AAH07426.1;AAH33320;AAH33320.1;AAN84793;AAN84793.1;AAV38458;AAV38458.1;AC145132;AC145145;ACE86721;ACE87407;AC_000048;AC_000137;AF110777;AF151895;AI879232;AJ878880;AJ878881;AY189986;BC003400;BC007349;BC007426;BC033320;BG490028;BG720149;BT019652;BX1178…	A8MSZ6;D3DWA3;Q16594;Q5F2S9;Q5U0D1;Q9BTS1;Q9Y3D8	TAF9	TAF9 RNA polymerase II, TATA box binding protein (TBP)-associated factor, 32kDa	coilin-interacting nuclear ATPase protein; transcription initiation factor TFIID subunit 9; adenylate kinase isoenzyme 6; RNA polymerase II TBP-associated factor subunit G; TAFII-32; TAFII-31; STAF31/32; TATA box binding protein (TBP)-associated factor, RNA polymerase II, G, 32kD; coilin interacting protein; OTTHUMP00000125196; transcription initiation factor TFIID 31 kD subunit; OTTHUMP000002221…		-0.6039	0.007141
193	A_72_P048771	PEAR1	375033	AC_000044;AC_000133;NC_000001;NM_001080471;NP_001073940;NT_004487;NW_001838531;NW_925683	AAI72296;AC_000044;AC_000133;AK074121;AK098809;AL158169;AL356104;BAB84947;BAB84947.1;BAC05419;BC172296;CAH70011;CAH70011.1;CAH72941;CAH72941.1;CAO03619;CR599082;CR609390;NC_000001;NM_001080471;NP_001073940;NT_004487;NW_001838531;NW_925683;Q5VY43;Q8N780	Q5VY43;Q8TEK2	PEAR1	platelet endothelial aggregation receptor 1	multiple epidermal growth factor-like domains protein 12; OTTHUMP00000038718; multiple EGF-like-domains 12; multiple EGF-like domains protein 12; hPEAR1	Platelet endothelial aggregation receptor 1	0.5144	0.003468
194	A_72_P146291	PGF2aR	5737	AC_000044;AC_000133;NC_000001;NM_000959;NM_001039585;NP_000950;NP_001034674;NT_032977;NW_001838579;NW_921351	AAA17684;AAA17684.1;AAB63152;AAB63152.1;AAC82378;AAI12966;AAI12966.1;AAQ76788;AAQ76788.1;AAR84381;AB041713;AB201108;ABM81883;ABM85046;AC_000044;AC_000133;AF004021;AF068679;AK292845;AK312816;AL136324;AY337000;AY485530;BAA94756;BAA94756.1;BAE03222;BAF85534;BAF85534.1;BC112965;BG771316;BQ897935;CA429969;CAC36038;CAC36038.1;CAI23426;CAI53641;CAI53647;CD013876;CH471059;CS008570;CS008582;DQ890957;DQ894…	A8K9Y0;P43088;Q2KHP3;Q9P1X4	PTGFR	prostaglandin F receptor (FP)	PGF2-alpha receptor; prostaglandin F2-alpha receptor; prostaglandin receptor (2-alpha); OTTHUMP00000011218; PGF2 alpha receptor; prostaglandin F2 alpha receptor; prostanoid FP receptor; PGF receptor; OTTHUMP00000037508	Prostaglandin F2-alpha receptor	0.5954	0.0004151
195	A_72_P181336	PIH1D1 (FLJ20643)	55011	AC_000062;AC_000151;NC_000019;NG_012747;NM_017916;NP_060386;NT_011109;NW_001838497;NW_927240	AA018444;AAH01108;AAH01108.1;AC010619;ACE87086;AC_000062;AC_000151;ADQ31733;AK000650;AK294687;AK304476;BAA91307;BAA91307.1;BAG57848;BAG65289;BC001108;CH471177;CR591090;CR592919;CR595455;CR597787;CR599690;CR605095;CR606142;CR606627;CR611670;CR620618;CR626084;DC385084;EAW52486;EAW52487;EU832754;HQ447246;NC_000019;NG_012747;NM_017916;NP_060386;NT_011109;NW_001838497;NW_927240;Q9NWS0	Q9BVL0;Q9NWS0	PIH1D1	PIH1 domain containing 1	nucleolar protein 17 homolog; PIH1 domain-containing protein 1	PIH1 domain-containing protein 1	0.4767	0.004303
196	A_72_P186381	PIP5K1A	8394	AC_000044;AC_000133;NC_000001;NM_001135636;NM_001135637;NM_001135638;NM_003557;NP_001129108;NP_001129109;NP_001129110;NP_003548;NT_004487;NW_001838529;NW_925683	AAC50910;AAC50910.1;AAC50911;AAC50911.1;AAC50912;AAC50912.1;AAC50913;AAH07833;AAH07833.1;AC_000044;AC_000133;AF085856;AK291015;AK295691;AK302268;AK309826;AL592424;BAF83704;BAF83704.1;BAG58542;BAG63614;BC007833;CAI16386;CAI16386.1;CAI16387;CAI16387.1;CAI16388;CAI16388.1;CAO72043;CAO72045;CH471121;CR596609;DA759212;DQ656041;EAW53459;EAW53460;EAW53461;EAW53461.1;NC_000001;NM_001135636;NM_001135637;N…	A8K4Q0;Q99754;Q99755;Q99756	PIP5K1A	phosphatidylinositol-4-phosphate 5-kinase, type I, alpha	PIP5K1-alpha; OTTHUMP00000196331; phosphatidylinositol-4-phosphate 5-kinase type-1 alpha; 68 kDa type I phosphatidylinositol-4-phosphate 5-kinase alpha; PIP5KIalpha; OTTHUMP00000014291; OTTHUMP00000014289; OTTHUMP00000235065; OTTHUMP00000014290; ptdIns(4)P-5-kinase 1 alpha	Phosphatidylinositol-4-phosphate 5-kinase type-1 alpha	0.3477	0.003844
197	A_72_P186381	PIP5KI	8394	AC_000044;AC_000133;NC_000001;NM_001135636;NM_001135637;NM_001135638;NM_003557;NP_001129108;NP_001129109;NP_001129110;NP_003548;NT_004487;NW_001838529;NW_925683	AAC50910;AAC50910.1;AAC50911;AAC50911.1;AAC50912;AAC50912.1;AAC50913;AAH07833;AAH07833.1;AC_000044;AC_000133;AF085856;AK291015;AK295691;AK302268;AK309826;AL592424;BAF83704;BAF83704.1;BAG58542;BAG63614;BC007833;CAI16386;CAI16386.1;CAI16387;CAI16387.1;CAI16388;CAI16388.1;CAO72043;CAO72045;CH471121;CR596609;DA759212;DQ656041;EAW53459;EAW53460;EAW53461;EAW53461.1;NC_000001;NM_001135636;NM_001135637;N…	A8K4Q0;Q99754;Q99755;Q99756	PIP5K1A	phosphatidylinositol-4-phosphate 5-kinase, type I, alpha	PIP5K1-alpha; OTTHUMP00000196331; phosphatidylinositol-4-phosphate 5-kinase type-1 alpha; 68 kDa type I phosphatidylinositol-4-phosphate 5-kinase alpha; PIP5KIalpha; OTTHUMP00000014291; OTTHUMP00000014289; OTTHUMP00000235065; OTTHUMP00000014290; ptdIns(4)P-5-kinase 1 alpha		0.3477	0.003844
198	A_72_P307508	PKI	5569	AC_000051;AC_000140;NC_000008;NM_006823;NM_181839;NP_006814;NP_862822;NT_008183;NW_001839133;NW_923929	AA644101;AAB21141;AAB21141.1;AAF40206;AAF40206.1;AAH22265;AAH22265.1;ABM84135;ABM87536;AC068700;AC_000051;AC_000140;AF234641;AK311857;BAG34798;BC022265;BI597731;BX419914;CAG33333;CAG33333.1;CH471068;CR457052;CR602843;CR607441;CR610811;CR614267;CR623358;CR744438;DB480496;DQ893209;DQ896537;DR763580;EAW87055;EAW87056;EAW87057;EAW87058;NC_000008;NM_006823;NM_181839;NP_006814;NP_862822;NT_008183;NW_00…	P04541;P61925;Q6IAV2	PKIA	protein kinase (cAMP-dependent, catalytic) inhibitor alpha	PKI-alpha; cAMP-dependent protein kinase inhibitor, muscle/brain isoform; OTTHUMP00000227040; cAMP-dependent protein kinase inhibitor alpha; OTTHUMP00000227039		-0.5006	0.004296
199	A_72_P307508	PKIA	5569	AC_000051;AC_000140;NC_000008;NM_006823;NM_181839;NP_006814;NP_862822;NT_008183;NW_001839133;NW_923929	AA644101;AAB21141;AAB21141.1;AAF40206;AAF40206.1;AAH22265;AAH22265.1;ABM84135;ABM87536;AC068700;AC_000051;AC_000140;AF234641;AK311857;BAG34798;BC022265;BI597731;BX419914;CAG33333;CAG33333.1;CH471068;CR457052;CR602843;CR607441;CR610811;CR614267;CR623358;CR744438;DB480496;DQ893209;DQ896537;DR763580;EAW87055;EAW87056;EAW87057;EAW87058;NC_000008;NM_006823;NM_181839;NP_006814;NP_862822;NT_008183;NW_00…	P04541;P61925;Q6IAV2	PKIA	protein kinase (cAMP-dependent, catalytic) inhibitor alpha	PKI-alpha; cAMP-dependent protein kinase inhibitor, muscle/brain isoform; OTTHUMP00000227040; cAMP-dependent protein kinase inhibitor alpha; OTTHUMP00000227039	cAMP-dependent protein kinase inhibitor alpha	-0.5006	0.004296
200	A_72_P084566	PLA2	50640	AC_000050;AC_000068;AC_000139;NC_000007;NM_015723;NP_056538;NT_007933;NT_079596;NW_001839071;NW_923640	AAD08847;AAD08847.1;AAF67630;AAF67630.1;AAF75269;AAF75269.1;AAF81246;AAF81246.1;AAH32999;AAH32999.1;AB041261;ABM81874;ABM85037;AC005058;AC_000050;AC_000068;AC_000139;AF217519;AF263613;AF263947;AK002115;AK024335;AK291755;AL834147;AM392663;BAA92090;BAA92090.1;BAA94997;BAA94997.1;BAB14890;BAB14890.1;BAF84444;BC005203;BC032999;BX647865;CAD38859;CAD38859.1;CAL37541;CH236947;CH471070;CR620052;DQ890948;…	A4D0S1;O95035;Q8N3I3;Q9H7T5;Q9NP80;Q9NR17;Q9NUN2;Q9NZ79	PNPLA8	patatin-like phospholipase domain containing 8	membrane-associated calcium-independent phospholipase A2 gamma; calcium-independent phospholipase A2-gamma; PNPLA-gamma; OTTHUMP00000206862; OTTHUMP00000206858; iPLA2-gamma; iPLA2 gamma; OTTHUMP00000206861; OTTHUMP00000206860; patatin-like phospholipase domain-containing protein 8; OTTHUMP00000206859; intracellular membrane-associated calcium-independent phospholipase A2 gamma; OTTHUMP00000206842		-0.597	0.001964
201	A_72_P356343	PLCD	56895	AC_000049;AC_000138;NC_000006;NM_020133;NP_064518;NT_025741;NW_001838992;NW_923184	AAF80338;AAF80338.1;AAH13410;AAH20209;AAH20209.1;AAQ88870;AAQ88870.1;AC_000049;AC_000138;ADQ32161;AF156776;AJ227890;AJ227891;AJ420473;AK074208;AK295025;AK295548;AK295826;AK297636;AK299721;AL109942;AL122123;AL832128;AY358506;BAG58081;BAG58454;BAG58643;BAG60008;BAG61621;BC013410;BC020209;BQ072907;CAH10489;CAI21475;CAI21478;CAI21478.1;CAI21480;CH471051;CR590247;CR609642;CR612654;CR615061;CR615644;CR…	Q5TEF0;Q9NRZ5	AGPAT4	1-acylglycerol-3-phosphate O-acyltransferase 4 (lysophosphatidic acid acyltransferase, delta)	lysophosphatidic acid acyltransferase-delta (LPAAT-delta); 1-AGPAT 4; lysophosphatidic acid acyltransferase delta; OTTHUMP00000017554; 1-acyl-sn-glycerol-3-phosphate acyltransferase delta; 1-AGP acyltransferase 4	1-acyl-sn-glycerol-3-phosphate acyltransferase delta	0.5017	0.00056
202	A_72_P116196	PLCL1	5334	AC_000045;AC_000134;NC_000002;NM_006226;NP_006217;NT_005403;NW_001838863;NW_921618	AAI01532;AAI01532.1;AAI11986;AAI11986.1;AAY14733;AAY14733.1;AC011997;AC013478;AC020719;AC092599;AC109589;AC_000045;AC_000134;AK127514;AK302673;BAA07688;BAA07688.1;BAG63906;BC101531;BC111985;BP340710;BX537442;CAD97684;CAD97684.1;CH471063;D42108;DA193701;DA414853;EAW70174;NC_000002;NM_006226;NP_006217;NT_005403;NW_001838863;NW_921618;Q15111;T87219	Q15111;Q3MJ90;Q53SD3;Q7Z3S3	PLCL1	phospholipase C-like 1	phospholipase C-related but catalytically inactive protein; PLC-L1; phospholipase C, epsilon; phospholipase C-deleted in lung carcinoma; inactive phospholipase C-like protein 1; phospholipase C related, but catalytically inactive protein; OTTHUMP00000208039	Inactive phospholipase C-like protein 1	0.6485	0.0004781
203	A_72_P127236	PMVK	10654	AC_000044;AC_000133;NC_000001;NM_006556;NP_006547;NT_004487;NW_001838531;NW_925683	AAC37593;AAC37593.1;AAC60791;AAC60791.1;AAH06089;AAH06089.1;AAH07694;AAH07694.1;AAV38779;AAV38779.1;AC_000044;AC_000133;ADZ15843;AF026069;AK130234;AK312803;AL451085;BAG35661;BC006089;BC007694;BF221848;BQ061044;BT019976;CAG46795;CAI13237;CH471121;CR541998;CR599616;CR603108;CR604920;CR622269;EAW53177;EAW53178;JF432626;L77213;NC_000001;NM_006556;NP_006547;NT_004487;NW_001838531;NW_925683;Q15126;Q6FG…	Q15126;Q5TZW9	PMVK	phosphomevalonate kinase	hPMK; OTTHUMP00000035546	Phosphomevalonate kinase	0.4198	0.004097
204	A_72_P357303	PNO1	56902	AC_000045;AC_000134;NC_000002;NM_020143;NP_064528;NT_022184;NW_001838769;NW_927719	AAF80763;AAF80763.1;AAH08304;AAH08304.1;AAH18152;AAH18152.1;AAK29434;AAK29434.1;AAY14714;AAY14714.1;AC017083;AC_000045;AC_000134;AF164799;AF349314;AK223118;AK225641;AK291715;AK313204;BAD96838;BAD96838.1;BAF84404;BAF84404.1;BAG36020;BC008304;BC018152;CH471053;CR591407;CR597643;EAW99879;EAW99879.1;NC_000002;NM_020143;NP_064528;NT_022184;NW_001838769;NW_927719;Q9NRX1	A8K6Q0;Q53G13;Q8WVB8;Q9NRX1	PNO1	partner of NOB1 homolog (S. cerevisiae)	KH-type RNA-binding protein 1; OTTHUMP00000159963; KH-type RNA binding protein 1; RNA binding protein; RNA-binding protein PNO1	RNA-binding protein PNO1	-0.5644	0.006709
205	A_72_P357918;A_72_P298814	PP1-cat	5500	AC_000045;AC_000134;NC_000002;NM_002709;NM_206876;NP_002700;NP_996759;NT_022184;NW_001838768;NW_927719	AAA85093;AAA85093.1;AAF01137;AAF01137.1;AAH02697;AAH02697.1;AAH12045;AAH12045.1;AAV38549;AAV38549.1;AAY24124;AAY24124.1;AC097724;AC_000045;AC_000134;AF092905;AI147919;AK295957;AK303682;AK312329;AK316532;AM392772;BAG35251;BAG35251.1;BAG58737;BAG64675;BAH14903;BC002697;BC012045;BE047402;BI551898;BM835970;BQ933435;BT019744;BU740022;BX477003;BX647295;BX647970;CAA56870;CAA56870.1;CAG47059;CAG47059.1;C…	B2R5V4;D6W565;P37140;P62140;Q5U087;Q6FG45	PPP1CB	protein phosphatase 1, catalytic subunit, beta isozyme	protein phosphatase 1, catalytic subunit, delta isoform; serine/threonine protein phosphatase PP1-beta catalytic subunit; serine/threonine-protein phosphatase PP1-beta catalytic subunit; protein phosphatase 1, catalytic subunit, beta isoform; protein phosphatase 1-delta; protein phosphatase 1-beta; OTTHUMP00000200968; OTTHUMP00000200967		-0.7812	0.0095
206	A_72_P165296	PPAR-beta(delta)	5467	AC_000049;AC_000138;NC_000006;NG_012345;NM_001171818;NM_001171819;NM_001171820;NM_006238;NM_177435;NP_001165289;NP_001165290;NP_001165291;NP_006229;NP_803184;NT_007592;NW_001838980;NW_923073	AAA36469;AAA36469.1;AAF62553;AAF62553.1;AAH02715;AAH02715.1;AAH07578;AAH07578.1;AAR05439;AAR05439.1;AAX14041;AAX14041.1;AB099507;AB307691;AC_000049;AC_000138;ADZ17376;AF246299;AF246300;AF246301;AF246302;AF246303;AK122614;AK291661;AK296425;AK304482;AK304878;AL022721;AY442342;AY919140;AY927506;BAC78903;BAC78903.1;BAF84350;BAF84350.1;BAG53624;BAG53624.1;BAG65293;BAG65615;BAH02282;BAH02282.1;BAH12347…	A8K6J6;B6ZGS1;Q03181;Q5D1P0;Q7Z5K0;Q9BUD4	PPARD	peroxisome proliferator-activated receptor delta	PPAR-beta; nuclear receptor subfamily 1 group C member 2; OTTHUMP00000016256; OTTHUMP00000016257; peroxisome proliferative activated receptor, delta; peroxisome proliferator-activated nuclear receptor beta/delta variant 2; nuclear hormone receptor 1; PPAR-delta; peroxisome proliferator-activated receptor beta	Peroxisome proliferator-activated receptor delta	-0.2487	0.002351
207	A_72_P165296	PPAR-beta(delta)/RXR-alpha	5467	AC_000049;AC_000138;NC_000006;NG_012345;NM_001171818;NM_001171819;NM_001171820;NM_006238;NM_177435;NP_001165289;NP_001165290;NP_001165291;NP_006229;NP_803184;NT_007592;NW_001838980;NW_923073	AAA36469;AAA36469.1;AAF62553;AAF62553.1;AAH02715;AAH02715.1;AAH07578;AAH07578.1;AAR05439;AAR05439.1;AAX14041;AAX14041.1;AB099507;AB307691;AC_000049;AC_000138;ADZ17376;AF246299;AF246300;AF246301;AF246302;AF246303;AK122614;AK291661;AK296425;AK304482;AK304878;AL022721;AY442342;AY919140;AY927506;BAC78903;BAC78903.1;BAF84350;BAF84350.1;BAG53624;BAG53624.1;BAG65293;BAG65615;BAH02282;BAH02282.1;BAH12347…	A8K6J6;B6ZGS1;Q03181;Q5D1P0;Q7Z5K0;Q9BUD4	PPARD	peroxisome proliferator-activated receptor delta	PPAR-beta; nuclear receptor subfamily 1 group C member 2; OTTHUMP00000016256; OTTHUMP00000016257; peroxisome proliferative activated receptor, delta; peroxisome proliferator-activated nuclear receptor beta/delta variant 2; nuclear hormone receptor 1; PPAR-delta; peroxisome proliferator-activated receptor beta		-0.2487	0.002351
208	A_72_P148506	PRDM4	11108	AC_000055;AC_000144;NC_000012;NM_012406;NP_036538;NT_029419;NW_001838061;NW_925395	AAD55249;AAD55249.2;AAH35581;AAH35581.1;AAH68562;ABM82163;ABM85348;AC007622;AC_000055;AC_000144;AF144757;AK056378;AL133083;AL832804;BAG51692;BC035581;BC068562;BU502236;CAB61401;CAB61401.1;CAI46888;CH471054;CR611729;DQ891237;DQ894422;EAW97804;EAW97805;NC_000012;NM_012406;NP_036538;NT_029419;NW_001838061;NW_925395;Q5GMF9;Q6NUK0;Q9UKN5	Q9UFA6;Q9UKN5	PRDM4	PR domain containing 4	PR domain-containing protein 4; PR domain zinc finger protein 4; PR-domain zinc-finger protein PFM1	PR domain zinc finger protein 4	0.5771	4.2e-05
209	A_72_P153021	PSMA6	5687	AC_000057;AC_000146;NC_000014;NG_011703;NM_002791;NP_002782;NT_026437;NW_001838110;NW_925539	AAG61139;AAH02979;AAH02979.1;AAH17882;AAH17882.1;AAH22354;AAH22354.1;AAH23659;AAH23659.1;AAH70137;AAH70137.1;ABM83272;ABM86477;AC_000057;AC_000146;AF332577;AK298920;AK302008;AK313011;AK316223;AL121594;AL133163;BAA05800;BAG35846;BAG35846.1;BAG61026;BAG63411;BAH14594;BC002979;BC017882;BC022354;BC023659;BC070137;BG701535;CAA42052;CAA42052.1;CAA43964;CAA43964.1;CAG33225;CAG33225.1;CH471078;CR456944;C…	B2R7J9;P34062;P60900;Q6IB60	PSMA6	proteasome (prosome, macropain) subunit, alpha type, 6	macropain iota chain; proteasome subunit alpha type-6; PROS-27; OTTHUMP00000178843; proteasome subunit iota; multicatalytic endopeptidase complex iota chain; prosomal P27K protein; 27 kDa prosomal protein; macropain subunit iota; proteasome iota chain	Proteasome subunit alpha type-6	0.2855	0.004401
210	A_72_P143817	PSMB4	5692	AC_000044;AC_000133;NC_000001;NM_002796;NP_002787;NT_004487;NW_001838529;NW_925683	AAB31085;AAB31085.1;AAP35563;AAP35563.1;ABM81674;ABM82946;ABM86138;AC_000044;AC_000133;AK294149;AK313825;AL589764;BAA05647;BAA05647.1;BAG36560;BAG36560.1;BAG57474;BC000331;BC008314;BC010088;BC010098;BC011768;BC012168;BC017307;BC017451;BC017486;BT006917;CAG33101;CAG33101.1;CAI16806;CAI16806.1;CH471121;CR456820;CR591973;CR596742;CR600806;CR601408;CR604816;CR604973;CR611217;CR612779;CR614383;CR61485…	B2R9L3;P28070;P31148;Q5SZS5;Q6IBI4;Q969L6	PSMB4	proteasome (prosome, macropain) subunit, beta type, 4	proteasome subunit beta type-4; 26 kDa prosomal protein; hsBPROS26; proteasome subunit HsN3; proteasome chain 3; proteasome beta chain; multicatalytic endopeptidase complex beta chain; OTTHUMP00000014463; proteasome subunit, beta type, 4; macropain beta chain	Proteasome subunit beta type-4	0.2579	0.005218
211	A_72_P254862;A_72_P232822	PSMC5	5705	AC_000060;AC_000149;NC_000017;NM_001199163;NM_002805;NP_001186092;NP_002796;NT_010783;NW_001838450;NW_926894	AAB88187;AAB88187.1;AAC41735;AAC41735.1;AAH01932;AAH01932.1;AAH02367;AAH02367.3;ABM83122;ABM86317;AC015651;AC_000060;AC_000149;AF035309;AI193169;AK095836;AK098484;AK290758;AK291878;BAA07919;BAA07919.1;BAF83447;BAF84567;BAF84567.1;BC001932;BC002367;BC127888;BF245599;BP209525;CH471109;CR594383;CR595677;CR604202;CR606458;CR608855;CR610576;CR613856;CR614294;CR619795;CR621341;CR623587;CR626071;D44467;…	A8K763;O35051;O43208;P47210;P52915;P52916;P62195	PSMC5	proteasome (prosome, macropain) 26S subunit, ATPase, 5	26S protease regulatory subunit 8; proteasome 26S subunit ATPase 5; thyroid hormone receptor-interacting protein 1; 26S proteasome AAA-ATPase subunit RPT6; Tat-binding protein homolog 10; proteasome subunit p45; MSUG1 protein; thyroid receptor interactor 1; proteasome 26S ATPase subunit 5	26S protease regulatory subunit 8	0.3304	0.0001141
212	A_72_P209872	PSMD8	5714	AC_000062;AC_000151;NC_000019;NM_002812;NP_002803;NT_011109;NW_001838496;NW_927217	AAC62833;AAC62833.1;AAH01164;AAH01164.3;AAH65006;AAH65006.2;AAV38494;AC005789;AC_000062;AC_000151;AK301771;AK304486;AK308809;BAA07237;BAA07237.1;BAG63230;BAG63230.1;BAG65296;BC001164;BC065006;BC071826;BI560993;BP369299;BQ684248;BT019688;CH471126;CR590029;CR590093;CR595613;CR595906;CR606879;CR618879;D38047;EAW56785;EAW56785.1;NC_000019;NM_002812;NP_002803;NT_011109;NW_001838496;NW_927217;P48556;Q5…	B4DX18;P48556;Q6P1L7	PSMD8	proteasome (prosome, macropain) 26S subunit, non-ATPase, 8	26S proteasome regulatory subunit p31; 26S proteasome non-ATPase regulatory subunit 8; 26S proteasome regulatory subunit RPN12; OTTHUMP00000198258; 26S proteasome regulatory subunit S14	26S proteasome non-ATPase regulatory subunit 8	0.2556	0.008032
213	A_72_P081241	PTD015	28971	AC_000054;AC_000143;NC_000011;NM_024684;NP_078960;NT_167190;NW_001838028;NW_925106	AAD40378;AAD40378.1;AAH02752;AAH02752.1;AAH16854;AAH16854.1;AC_000054;AC_000143;ADQ32842;AF092136;AK024688;AP000580;AP002812;BAB14963;BAB14963.1;BC002752;BC016854;CAG33613;CAG33613.1;CH471076;CR457332;EAW75036;EAW75037;EAW75038;EAW75039;HQ448362;NC_000011;NM_024684;NP_078960;NT_167190;NW_001838028;NW_925106;Q9H7C9	Q96AQ4;Q9H7C9;Q9Y6B1	C11orf67	chromosome 11 open reading frame 67	hypothetical protein LOC28971; OTTHUMP00000233914; OTTHUMP00000233915; OTTHUMP00000233920	UPF0366 protein C11orf67	0.3508	0.004726
214	A_72_P291279	PTPRN	5798	AC_000045;AC_000134;NC_000002;NM_001199763;NM_001199764;NM_002846;NP_001186692;NP_001186693;NP_002837;NT_005403;NW_001838865;NW_921618	AAA90974;AAA90974.1;AAH07713;AAH70053;AAP35621;AAY24038;AAY24038.1;AB209368;AC114803;AC_000045;AC_000134;AF042285;AK054765;AK122679;AK291469;AK294490;AK296335;AK314574;BAD92605;BAF84158;BAG53662;BAG57712;BAG59024;BC007713;BC070053;BT006975;CAA44688;CAA44688.2;CH471063;DC344431;DC352946;EAW70724;EAW70725;EAW70726;EAW70726.1;L18983;NC_000002;NM_001199763;NM_001199764;NM_002846;NP_001186692;NP_00118…	Q08319;Q16849;Q53QD6	PTPRN	protein tyrosine phosphatase, receptor type, N	OTTHUMP00000164170; receptor-type tyrosine-protein phosphatase-like N; protein tyrosine phosphatase-like N; OTTHUMP00000205824; islet cell autoantigen 3; islet cell antigen 2; islet cell antigen 512; PTP IA-2; ICA 512	Receptor-type tyrosine-protein phosphatase-like N	-0.4138	0.0009978
215	A_72_P228307	Phosphatase regulator (inhibitor)	55607	AC_000050;AC_000068;AC_000139;NC_000007;NG_008779;NG_015803;NM_001166160;NM_001166161;NM_001166162;NM_001166163;NM_017650;NP_001159632;NP_001159633;NP_001159634;NP_001159635;NP_060120;NT_007933;NT_079595;NW_001839064;NW_923574	AAC35294;AAC35294.2;AAI30450;AAI44110;AAI50637;AB033048;AC002429;AC004022;AC073886;AC073890;AC_000050;AC_000068;AC_000139;AK000075;AK096514;AK225204;BAA86536;BAA86536.1;BAA90928;BAA90928.1;BC037849;BC130449;BC144108;BC144109;BC150636;CH236949;CH471091;DA497168;EAL24134;EAW76776;NC_000007;NG_008779;NG_015803;NM_001166160;NM_001166161;NM_001166162;NM_001166163;NM_017650;NP_001159632;NP_001159633;NP…	O76059;Q9NXT2;Q9ULJ8	PPP1R9A	protein phosphatase 1, regulatory (inhibitor) subunit 9A	protein phosphatase 1 regulatory subunit 9A; neurabin-1; neural tissue-specific F-actin-binding protein I; OTTHUMP00000208242; OTTHUMP00000208241; OTTHUMP00000208240		0.3935	0.006536
216	A_72_P084566	Pnpla8	50640	AC_000050;AC_000068;AC_000139;NC_000007;NM_015723;NP_056538;NT_007933;NT_079596;NW_001839071;NW_923640	AAD08847;AAD08847.1;AAF67630;AAF67630.1;AAF75269;AAF75269.1;AAF81246;AAF81246.1;AAH32999;AAH32999.1;AB041261;ABM81874;ABM85037;AC005058;AC_000050;AC_000068;AC_000139;AF217519;AF263613;AF263947;AK002115;AK024335;AK291755;AL834147;AM392663;BAA92090;BAA92090.1;BAA94997;BAA94997.1;BAB14890;BAB14890.1;BAF84444;BC005203;BC032999;BX647865;CAD38859;CAD38859.1;CAL37541;CH236947;CH471070;CR620052;DQ890948;…	A4D0S1;O95035;Q8N3I3;Q9H7T5;Q9NP80;Q9NR17;Q9NUN2;Q9NZ79	PNPLA8	patatin-like phospholipase domain containing 8	membrane-associated calcium-independent phospholipase A2 gamma; calcium-independent phospholipase A2-gamma; PNPLA-gamma; OTTHUMP00000206862; OTTHUMP00000206858; iPLA2-gamma; iPLA2 gamma; OTTHUMP00000206861; OTTHUMP00000206860; patatin-like phospholipase domain-containing protein 8; OTTHUMP00000206859; intracellular membrane-associated calcium-independent phospholipase A2 gamma; OTTHUMP00000206842	Calcium-independent phospholipase A2-gamma	-0.597	0.001964
217	A_72_P165656	Proepithelin	2896	AC_000060;AC_000149;NC_000017;NG_007886;NM_002087;NP_002078;NT_010783;NW_001838437;NW_926839	AAA58617;AAA58617.1;AAC09359;AAC09359.1;AAH00324;AAH00324.1;AAH10577;AAH10577.1;AAM94026;AAM94026.1;AAP35490;AAP35490.1;AC003043;AC_000060;AC_000149;AF055008;AK000607;AK023348;AK222522;AK296090;AK303830;AY124489;BAB14535;BAD96242;BAG58844;BAG64777;BC000324;BC010577;BT006844;CAA44196;CAA44196.1;CH471178;CR590771;CR591645;CR592712;CR594600;CR594708;CR601091;CR602616;CR604991;CR606406;CR613011;CR616…	D3DX55;P23781;P23782;P23783;P23784;P28799;Q53Y88;Q540U8;Q9BWE7;Q9UCH0	GRN	granulin	granulins; PC cell-derived growth factor; granulin-epithelin; proepithelin; acrogranin; progranulin	Granulins	0.5685	0.002246
218	A_72_P107181;A_72_P056791	Protein KIAA0406	9675	AC_000063;AC_000152;NC_000020;NM_014657;NP_055472;NT_011362;NW_001838665;NW_927339	AAH13121;AAH13121.1;AAH13755;AAH13755.1;AAI07779;AAI31760;AB007866;AC_000063;AC_000152;AK308164;AL109823;BAA23702;BAA23702.2;BC013121;BC013755;BC107778;BC131759;BR000854;CAI19022;CAI19022.1;CH471077;CR596340;CR607862;EAW76047;EAW76048;EAW76049;EAW76050;FAA00688;NC_000020;NM_014657;NP_055472;NT_011362;NW_001838665;NW_927339;O43156;Q3B768	O43156;Q5JX67;Q96A38;Q9BR47;Q9H4K0	TTI1	Tel2 interacting protein 1 homolog (S. pombe)	KIAA0406; OTTHUMP00000030950; TEL2-interacting protein 1 homolog; OTTHUMP00000030952; smg-10 homolog, nonsense mediated mRNA decay factor; Tel two interacting protein 1	TEL2-interacting protein 1 homolog	-0.3789	0.001141
219	A_72_P225909	QKI	9444	AC_000049;AC_000138;NC_000006;NM_006775;NM_206853;NM_206854;NM_206855;NP_006766;NP_996735;NP_996736;NP_996737;NT_025741;NW_001838992;NW_923184	AAF63412.1;AAF63413;AAF63413.1;AAF63414;AAF63414.1;AAF63415.1;AAF63416.1;AAF63417;AAF63417.1;AAH12222;AAH12222.1;AAH19917;AAH19917.1;AAL36980;AAV98358;AAV98358.1;AB067798;AB067799;AB067800;AB067801;AB067808;ABC88600;ABC88600.1;ACE87839;ACT64517;AC_000049;AC_000138;ADQ32331;AF142417;AF142418;AF142419;AF142420;AF142421;AF142422;AF272349;AI146598;AJ420502;AK027309;AK055085;AK096701;AK295235;AK308784…	Q2I375;Q5MJQ1;Q969L9;Q96EJ3;Q96KA3;Q96PU6;Q96PU7;Q96PU8;Q9P0X6;Q9P0X7;Q9P0X8;Q9P0X9;Q9P0Y0;Q9P0Y1	QKI	quaking homolog, KH domain RNA binding (mouse)	RNA binding protein HQK; OTTHUMP00000239153; protein quaking; hqkI; OTTHUMP00000017583; OTTHUMP00000239274; OTTHUMP00000239159; homolog of mouse quaking QKI (KH domain RNA binding protein); OTTHUMP00000017582; OTTHUMP00000239152; OTTHUMP00000239151; OTTHUMP00000017581; OTTHUMP00000239150; OTTHUMP00000239156	Protein quaking	-0.6741	0.007256
220	A_72_P362433	RABGEF1	27342	AC_000050;AC_000068;AC_000139;NC_000007;NM_014504;NP_055319;NT_007933;NT_079593;NW_001839038;NW_923417	AAH15330;AAH15330.1;AAP35771;AAP35771.1;AAQ93362;AAQ93362.1;ABA64473;ABA64473.1;ABA64474;ABA64474.1;ABA64475;AC027644;AC_000050;AC_000068;AC_000139;AI061350;AJ250042;AK001702;AK056864;AK127790;AK223329;AK290678;AK303006;AW196783;BAC87138.1;BAD97049;BAD97049.1;BAF83367;BAG50963;BAG64139;BC015330;BM310029;BT007107;CAB57359;CAB57359.1;CD366530;CH471140;DA196847;DQ230533;DQ230534;DQ230535;EAX07913;EA…	Q3HKR2;Q3HKR3;Q53FG0;Q9UJ41	RABGEF1	RAB guanine nucleotide exchange factor (GEF) 1	OTTHUMP00000210543; RAP1; rabaptin-5-associated exchange factor for Rab5; OTTHUMP00000159944; OTTHUMP00000210544; rab5 GDP/GTP exchange factor	Rab5 GDP/GTP exchange factor	-0.5005	0.0008596
221	A_72_P232667	RAMP	10266	AC_000060;AC_000149;NC_000017;NM_005854;NP_005845;NT_010783;NW_001838436;NW_926828	AAH27975;AAH27975.1;AAP23299;AAP23299.1;ABM84247;ABM87635;ABS28868;AC100793;AC_000060;AC_000149;AJ001015;AL548945;AY265458;BC027975;CAA04473;CAA04473.1;CH471152;CR590147;CR621805;DQ893321;DQ896636;EAW60877;EAW60878;EF687002;NC_000017;NM_005854;NP_005845;NT_010783;NW_001838436;NW_926828;O60895	O60895;Q8N1F2	RAMP2	receptor (G protein-coupled) activity modifying protein 2	CRLR activity-modifying protein 2; receptor activity modifying protein 2; calcitonin-receptor-like receptor activity-modifying protein 2; receptor activity-modifying protein 2; receptor (calcitonin) activity modifying protein 2; receptor-activity-modifying protein 2; calcitonin receptor-like receptor activity modifying protein 2		0.3639	0.004473
222	A_72_P232667	RAMP2	10266	AC_000060;AC_000149;NC_000017;NM_005854;NP_005845;NT_010783;NW_001838436;NW_926828	AAH27975;AAH27975.1;AAP23299;AAP23299.1;ABM84247;ABM87635;ABS28868;AC100793;AC_000060;AC_000149;AJ001015;AL548945;AY265458;BC027975;CAA04473;CAA04473.1;CH471152;CR590147;CR621805;DQ893321;DQ896636;EAW60877;EAW60878;EF687002;NC_000017;NM_005854;NP_005845;NT_010783;NW_001838436;NW_926828;O60895	O60895;Q8N1F2	RAMP2	receptor (G protein-coupled) activity modifying protein 2	CRLR activity-modifying protein 2; receptor activity modifying protein 2; calcitonin-receptor-like receptor activity-modifying protein 2; receptor activity-modifying protein 2; receptor (calcitonin) activity modifying protein 2; receptor-activity-modifying protein 2; calcitonin receptor-like receptor activity modifying protein 2	Receptor activity-modifying protein 2	0.3639	0.004473
223	A_72_P073241	RARS	5917	AC_000048;AC_000137;NC_000005;NM_002887;NP_002878;NT_023133;NW_001838954;NW_922784	AAB35627;AAB35627.1;AAH00528;AAH00528.1;AAH14619;AAH14619.1;AAP36058;AAP36058.1;AC020894;AC_000048;AC_000137;AK222797;AK302161;AK314795;AU125370;BAD96517;BAD96517.1;BAG37326;BAG37326.1;BAG63528;BC000528;BC014619;BM984528;BT007394;CA439316;CH471062;CR606014;CR608263;CR615478;CR616753;CR619064;EAW61507;NC_000005;NM_002887;NP_002878;NT_023133;NW_001838954;NW_922784;P54136;S80343	B2RBS9;P54136;Q53GY4;Q9BWA1	RARS	arginyl-tRNA synthetase	arginine--tRNA ligase; arginyl-tRNA synthetase, cytoplasmic; arginine tRNA ligase 1, cytoplasmic; OTTHUMP00000160962	Arginyl-tRNA synthetase, cytoplasmic	0.1754	0.0007312
224	A_72_P313378	RBBP6	5930	AC_000059;AC_000148;NC_000016;NM_006910;NM_018703;NM_032626;NP_008841;NP_061173;NP_116015;NT_010393;NW_001838401;NW_926217	AAF71048;AAG43155;AAG43155.1;AAH15318;AAH29352;AAH29352.1;AAH63524;AAH63524.1;AAH73938;AAH73938.1;AAI01140;AAI01140.1;AAI01141;AAI01141.1;AAI01142;AAI01142.1;AAI01143;AAI01143.1;AAI14354;AAI14354.1;AAI14355;AAI14355.1;AAI18668;AAI18668.1;AAI39831;AAI39831.1;AAI72357;AAL05625;AAL05625.1;AAL68925;AAL68925.1;AB112074;AB112075;AC010321;AC_000059;AC_000148;ADQ32273;AF063596;AF116625;AF352051;AK023612;…	Q147T5;Q15290;Q6DKH4;Q6P4C2;Q6YNC9;Q7Z6E8;Q7Z6E9;Q8N0V2;Q96PH3;Q9H3I8;Q9H5M5;Q9NPX4	RBBP6	retinoblastoma binding protein 6	retinoblastoma-binding Q protein 1; proliferation potential-related protein; p53-associated cellular protein of testis; protein P2P-R; retinoblastoma-binding protein 6, isoform 3; E3 ubiquitin-protein ligase RBBP6; OTTHUMP00000122472; RB-binding Q-protein 1; OTTHUMP00000122471; retinoblastoma-binding protein 6	E3 ubiquitin-protein ligase RBBP6	0.507	0.003248
225	A_72_P059861	RBM10	8241	AC_000066;AC_000155;NC_000023;NG_009161;NG_012548;NM_001204466;NM_001204467;NM_001204468;NM_005676;NM_152856;NP_001191395;NP_001191396;NP_001191397;NP_005667;NP_690595;NT_079573;NW_001842362;NW_927702	AAB33572;AAB33572.1;AAH00681;AAH03089;AAH03089.1;AAH04181;AAH04181.1;AAH08733;AAH08733.1;AAH24153;AAH24153.1;AC_000066;AC_000155;AK000962;AK024839;AK025854;AK098115;AK225175;AK292758;AL137421;AL513366;AM393073;AW248804;BAA09471;BAA09471.1;BAF85447;BAF85447.1;BC000681;BC003089;BC004181;BC008733;BC024153;BX537969;CAB70731;CAB70731.1;CAD97933;CAI41700;CAI41700.1;CAI41701;CAL37951;CH471164;CR612855;C…	C4AM81;P98175;Q14136;Q5JRR2;Q9BTE4;Q9BTX0;Q9NTB1	RBM10	RNA binding motif protein 10	g patch domain-containing protein 9; RNA-binding protein 10; OTTHUMP00000023191; OTTHUMP00000023192; RNA-binding protein S1-1	RNA-binding protein 10	0.4027	0.0006054
226	A_72_P309628	RBM34	23029	AC_000044;AC_000133;NC_000001;NM_001161533;NM_015014;NP_001155005;NP_055829;NR_027762;NT_167186;NW_001838549;NW_927128	AAH29451;AAH29451.1;AC_000044;AC_000133;ADQ32089;AK292362;AL133418;AL732292;BAA07503;BAA07503.1;BAF85051;BAF85051.1;BC029451;BQ000441;CAI21936;CAI21936.1;CAI22959;CAI22960;CAI22960.1;CB052493;CH471098;CR609536;CR615831;CR621996;D38491;EAW70005;EAW70006;EAW70007;HQ447603;NC_000001;NM_001161533;NM_015014;NP_001155005;NP_055829;NR_027762;NT_167186;NW_001838549;NW_927128;P42696	A8K8J7;P42696;Q8N2Z8;Q9H5A1	RBM34	RNA binding motif protein 34	RNA-binding motif protein 34; RNA-binding protein 34; OTTHUMP00000039006; OTTHUMP00000039007; OTTHUMP00000039008	RNA-binding protein 34	-0.1593	0.009756
227	A_72_P260522	RHG7	10395	AC_000051;AC_000140;NC_000008;NG_015998;NM_001164271;NM_006094;NM_024767;NM_182643;NP_001157743;NP_006085;NP_079043;NP_872584;NT_167187;NW_001839126;NW_923907	AAB81637;AAB81637.1;AAB87700;AAB87700.1;AAH49842;AAH54511;AAH54511.1;AAK97501;AAK97501.1;AAZ32940;AAZ32941;AAZ32942;AB051510;AC015641;AC019270;AC022844;AC106845;ACE86794;ACE87481;AC_000051;AC_000140;AF026219;AF035119;AF408768;AF408769;AF408770;AF408771;AF408772;AF408773;AF408774;AF408775;AF408776;AF408777;AF408778;AF408779;AF408780;AF408781;AK023128;AK024773;AK024774;AK025544;AK025733;AK225098;AK…	O14868;O43199;Q7Z5R8;Q96QB1;Q9C0E0;Q9H7A2	DLC1	deleted in liver cancer 1	START domain-containing protein 12; deleted in liver cancer 1 protein; rho GTPase-activating protein 7; OTTHUMP00000218771; OTTHUMP00000218772; rho-type GTPase-activating protein 7; Rho-GTPase-activating protein 7; OTTHUMP00000116052; OTTHUMP00000116050; OTTHUMP00000116051; StAR-related lipid transfer (START) domain containing 12; deleted in liver cancer 1 variant 2; OTTHUMP00000225457	Rho GTPase-activating protein 7	0.4722	0.0009419
228	A_72_P423789	RINT-1	60561	AC_000050;AC_000068;AC_000139;NC_000007;NM_021930;NP_068749;NT_007933;NT_079596;NW_001839071;NW_923640	AAG42101;AAG42101.1;AAH07120;AAH07120.2;AAH68483;AAH68483.1;AAQ96849;AAQ96849.1;AAQ96850;AAQ96850.1;AC073073;AC_000050;AC_000068;AC_000139;ADR82734;AF317622;AK021847;AK055508;AK057757;AK308126;AL832825;BAB13910;BAB13910.1;BAG51530;BC007120;BC068483;CH236947;CH471070;CR601014;EAW83366;EAW83367;HQ257980;NC_000007;NM_021930;NP_068749;NT_007933;NT_079596;NW_001839071;NW_923640;Q6NUQ1	Q6NUQ1;Q75MG9;Q75MH0;Q96IW8;Q9H229;Q9HAD9	RINT1	RAD50 interactor 1	hsRINT-1; RAD50-interacting protein 1; OTTHUMP00000212078	RAD50-interacting protein 1	0.2339	0.003972
229	A_72_P165771	RPIA	22934	AC_000045;AC_000134;NC_000002;NG_016710;NM_144563;NP_653164;NT_022184;NW_001838785;NW_927808	AAH15529;AAH15529.2;AAK95569;AAK95569.1;AAY14778;AAY24200;AC062029;AC096579;AC_000045;AC_000134;AY050633;BC015529;BF063086;CB989690;CH471215;CR591516;CR592299;CR597054;CR599007;CR613216;CR620468;CR621693;CR624462;EAW77066;EAW77067;L35035;NC_000002;NG_016710;NM_144563;NP_653164;NT_022184;NW_001838785;NW_927808;P49247;Q53R32;Q53SB2	P49247;Q541P9;Q96BJ6	RPIA	ribose 5-phosphate isomerase A	ribose-5-phosphate isomerase; phosphoriboisomerase; OTTHUMP00000160851; ribose 5-phosphate epimerase	Ribose-5-phosphate isomerase	0.3065	0.006284
230	A_72_P217482;A_72_P020461	RPL10A (CsA-19)	4736	AC_000049;AC_000138;NC_000006;NG_011708;NM_007104;NP_009035;NT_007592;NW_001838980;NW_923073	AAA86463;AAA86463.1;AAH06791;AAH06791.1;AAH11366;AAH11366.1;AAH70216;AAH70216.1;AAI16457;AAV38843;AAV38843.1;AAV38844;AAV38844.1;AB082926;ABM82056;ABM85235;AC_000049;AC_000138;AF086557;AK313181;AL022721;BAC16802;BAC16802.1;BAG35998;BAG35998.1;BC006791;BC011366;BC013864;BC070216;BC116456;BP318268;BT020040;BT020041;CAB38627;CAB38627.1;CBJ05781;CBJ21233;CH471081;CR593085;CR597757;CR598556;CR599594;C…	B2R801;P52859;P53025;P62906;Q5TZT6;Q8J013	RPL10A	ribosomal protein L10a	NEDD-6; 60S ribosomal protein L10a; OTTHUMP00000016255; neural precursor cell expressed developmentally down-regulated protein 6	60S ribosomal protein L10a	0.2819	0.005794
231	A_72_P157666	RPS16	6217	AC_000062;AC_000151;NC_000019;NM_001020;NP_001011;NT_011109;NW_001838496;NW_927217	AAA60583;AAA60583.1;AAH04324;AAH04324.1;AAH07977;AAH07977.1;AAH71674;AB061841;ABM84375;ABM87218;AC011500;AC_000062;AC_000151;AK055869;AK315498;BAA05758;BAB79479;BAB79479.1;BAG37882;BAG37882.1;BC004324;BC007977;BC024970;BC071674;BC095429;BQ421722;CAR81492;CAS91508;CB107158;CB242275;CH471126;CR619874;D28392;DQ893449;DQ896219;EAW56892;EAW56893;EAW56894;EAW56894.1;EAW56895;FB342983;FB711106;M60854;NC…	B2RDD5;P17008;P62249	RPS16	ribosomal protein S16	40S ribosomal protein S16	40S ribosomal protein S16	0.807	8.42e-05
232	A_72_P403288	Rab-8	4218	AC_000062;AC_000151;NC_000019;NM_005370;NP_005361;NT_011295;NW_001838484;NW_927195	AAB19681;AAB19681.1;AAH02977;AAH02977.1;AAM21091;AAM21091.1;AAP35848;AAP35848.1;AB209767;ABM83449;ABM86661;AC008894;AC_000062;AC_000151;AF498943;AK025165;AK293676;BAD93004;BAG57118;BC002977;BT007184;BU940750;CAA40065;CAA40065.1;CAG38820;CAG38820.1;CAG47070;CAG47070.1;CH471106;CR536583;CR542274;CR590930;CR594350;CR597154;CR612819;CR615093;CR625894;DQ892523;DQ895735;EAW84526;EAW84526.1;EAW84527;NC_…	P24407;P61006;Q6FHV5	RAB8A	RAB8A, member RAS oncogene family	oncogene c-mel; ras-related protein Rab-8A; mel transforming oncogene (derived from cell line NK14); mel transforming oncogene (derived from cell line NK14)- RAB8 homolog; ras-associated protein RAB8; mel transforming oncogene (RAB8 homolog)	Ras-related protein Rab-8A	-0.6219	0.001997
233	A_72_P355338	Respiratory Complex III	4519	NC_012920;YP_003024038	AAA19775.1;AAA31851.1;AAB58955;AAB58955.3;AAK17219.1;AAK17232.2;AAK17245.2;AAK17258.1;AAK17271.2;AAK17284.2;AAK17297.2;AAK17310.2;AAK17323.2;AAK17336.2;AAK17349.2;AAK17362.2;AAK17375.2;AAK17388.1;AAK17401.1;AAK17414.1;AAK17427.1;AAK17440.2;AAK17453.2;AAK17466.1;AAK17479.1;AAK17492.2;AAK17505.2;AAK17518.2;AAK17531.2;AAK17544.1;AAK17557.2;AAK17570.1;AAK17583.2;AAK17596.2;AAK17609.2;AAK17622.2;AAK17…	P00156;Q34786;Q8HBR6;Q8HNQ0;Q8HNQ1;Q8HNQ9;Q8HNR4;Q8HNR7;Q8W7V8;Q8WCV9;Q8WCY2;Q8WCY7;Q8WCY8;Q9B1A6;Q9B1B6;Q9B1B8;Q9B1D4;Q9B1X6;Q9B2V0;Q9B2V8;Q9B2W0;Q9B2W3;Q9B2W8;Q9B2X1;Q9B2X7;Q9B2X9;Q9B2Y3;Q9B2Z0;Q9B2Z4;Q9T6H6;Q9T9Y0;Q9TEH4	CYTB	mitochondrially encoded cytochrome b	cytochrome b		-0.3485	0.004918
234	A_72_P290969	Ro60	6738	AC_000044;AC_000133;NC_000001;NM_001042369;NM_001042370;NM_001173524;NM_001173525;NM_004600;NP_001035828;NP_001035829;NP_001166995;NP_001166996;NP_004591;NR_033393;NT_004487;NW_001838533;NW_926128	AAA35493;AAA35493.1;AAA35532;AAA35532.1;AAB81552;AAB81552.1;AAB81553;AAB81553.1;AAH36658;AAH36658.1;AAO47001;AAO47002;ABM82452;ABM85642;AC_000044;AC_000133;AI433657;AK314594;AL136370;AY205314;AY205315;BAG37166;BAG37166.1;BC036658;BI560207;BQ227323;BX394323;CAC17589;CAC17589.1;CAI10822;CAI10823;CAI10824;CAI10825;CH471067;CR592331;CR616562;CR936683;CX761715;DA518443;DQ891526;DQ894716;EAW91239;EAW91…	B2RBB9;P10155;Q92787;Q9H1W6	TROVE2	TROVE domain family, member 2	Sjogren syndrome antigen A2 (60kD, ribonucleoprotein autoantigen SS-A/Ro); OTTHUMP00000033764; 60 kDa ribonucleoprotein Ro; sjoegren syndrome type A antigen; 60 kDa SS-A/Ro ribonucleoprotein; OTTHUMP00000033760; OTTHUMP00000033762; OTTHUMP00000033761; Sjogren syndrome antigen A2 (60kDa, ribonucleoprotein autoantigen SS-A/Ro); OTTHUMP00000033763; OTTHUMP00000033759; gastric cancer multi-drug resis…	60 kDa SS-A/Ro ribonucleoprotein	1.122	0.003857
235	A_72_P223687	SAHH	191	AC_000063;AC_000152;NC_000020;NG_012630;NM_000687;NM_001161766;NP_000678;NP_001155238;NT_011362;NW_001838664;NW_927339	AAA51681;AAA51681.1;AAA51682;AAA51682.1;AAH10018;AAH10018.1;AAH11606;AAH11606.1;AAI14925;AAP35343;AAP35343.1;ABM82627;ABM84656;ABM86323;ABM92186;AC_000063;AC_000152;AK097610;AK290422;AK300014;AK309204;AK316180;AL356299;BAF83111;BAF83111.1;BAG53495;BAG61829;BAH14551;BC010018;BC011606;BC114924;BE785593;BT006697;CAC09528;CAC09528.1;CH471077;CR594678;CR603449;CR603916;CR609798;CR610700;CR613383;CR614…	A8K307;E1P5P2;P23526;Q96A36	AHCY	adenosylhomocysteinase	adoHcyase; S-adenosylhomocysteine hydrolase; S-adenosyl-L-homocysteine hydrolase; OTTHUMP00000030684	Adenosylhomocysteinase	0.371	0.0004317
236	A_72_P126081	SCAMP3	10067	AC_000044;AC_000133;NC_000001;NM_005698;NM_052837;NP_005689;NP_443069;NT_004487;NW_001838531;NW_003315906;NW_925683	AAB62724;AAB62724.1;AAC51821;AAC51821.1;AAH00161;AAH00161.1;AAH05135;AAH05135.1;AAH10505;AAH10505.1;AC_000044;AC_000133;AF005039;AF023268;AL713999;BC000161;BC005135;BC010505;BM790077;BU193466;CAG46557;CAI95095;CAI95095.1;CAI95096;CAI95096.1;CH471121;CR541757;CR591169;CR594552;CR595229;CR595790;CR595973;CR597366;CR597858;CR603538;CR605236;CR608453;CR610056;CR612186;CR612262;CR613841;CR614292;CR615…	A9Z1W6;B1AVS6;O14828;O15128;Q96FR8;Q9BPY0	SCAMP3	secretory carrier membrane protein 3	secretory carrier-associated membrane protein 3; propin 1; OTTHUMP00000034066; OTTHUMP00000034067	Secretory carrier-associated membrane protein 3	0.3406	0.002847
237	A_72_P404853	SCS-G	8801	AC_000046;AC_000135;NC_000003;NM_001177599;NM_003848;NP_001171070;NP_003839;NT_022459;NW_001838878;NW_921651	AAC64397;AAC64397.1;AAD20032;AAD20032.1;AAH07716;AAH07716.3;AAH19868;AAH19868.1;AAH35149;AAH47024;AAH47024.1;AAH68602;AAH68602.1;AC099783;AC112213;AC113169;AC114401;AC_000046;AC_000135;AF058954;AF131748;AK294598;AK310527;AL050226;BAH11821;BC007716;BC019868;BC035149;BC047024;BC068602;CAB43323;CH471055;CR592655;EAW65456;EAW65457;NC_000003;NM_001177599;NM_003848;NP_001171070;NP_003839;NT_022459;NW_0…	O95195;Q6NUH7;Q86VX8;Q8WUQ1;Q96I99	SUCLG2	succinate-CoA ligase, GDP-forming, beta subunit	GTP-specific succinyl-CoA synthetase beta subunit; GTP-specific succinyl-CoA synthetase subunit beta; succinyl-CoA ligase [GDP-forming] subunit beta, mitochondrial; SCS-betaG; OTTHUMP00000213364; succinyl-CoA synthetase, beta-G chain; OTTHUMP00000213363; succinyl-CoA ligase, GDP-forming, beta chain, mitochondrial; OTTHUMP00000213365; succinyl-CoA synthetase beta-G chain		0.7992	0.009896
238	A_72_P029446	SENP1	29843	AC_000055;AC_000144;NC_000012;NG_016199;NM_014554;NP_055369;NT_029419;NW_001838057;NW_925351	AAF31171;AAF31171.1;AAH45639;AAH45639.2;AC004801;AC074029;AC_000055;AC_000144;AF149770;AK292060;AK312874;AL582855;BAF84749;BAF84749.1;BC045639;BI560893;BX537920;BX640784;CAD97903;CAE45874;CH471111;EAW57971;EAW57972;NC_000012;NG_016199;NM_014554;NP_055369;NT_029419;NW_001838057;NW_925351;Q6N001;Q7Z3G1;Q9P0U3	A8K7P5;Q86XC8;Q9P0U3	SENP1	SUMO1/sentrin specific peptidase 1	sentrin/SUMO-specific protease SENP1; SUMO1/sentrin specific protease 1; sentrin-specific protease 1	Sentrin-specific protease 1	-0.5734	0.0003841
239	A_72_P197892	SKIV2L2	23517	AC_000048;AC_000137;NC_000005;NM_015360;NP_056175;NT_006713;NW_001838934;NW_922607	AAH14669;AAH14669.2;AAH28604;AAH28604.3;AAH31779;AAH31779.1;AAH65258;AAH65258.1;AAI04997;AAI04997.1;AAI05292;AAI13510;AAI13510.1;AC010480;AC020728;AC_000048;AC_000137;AK291649;AK304788;BAA06124;BAA06124.2;BAF84338;BAG65538;BC014669;BC028604;BC031779;BC065258;BC104996;BC105291;BC113509;BX640789;CAE45877;CAE45877.1;CH471123;D29641;DA524147;EAW54919;NC_000005;NM_015360;NP_056175;NT_006713;NW_0018389…	P42285;Q2M386;Q6MZZ8;Q6P170;Q8N5R0;Q8TAG2	SKIV2L2	superkiller viralicidic activity 2-like 2 (S. cerevisiae)	functional spliceosome-associated protein 118; ATP-dependent helicase SKIV2L2; superkiller viralicidic activity 2-like 2; KIAA0052; OTTHUMP00000122510	Superkiller viralicidic activity 2-like 2	-0.573	0.005852
240	A_72_P028886	SLC2A12	154091	AC_000049;AC_000138;NC_000006;NM_145176;NP_660159;NT_025741;NW_001838990;NW_923184	AAH70149;AAH70149.1;AAL02327;AAL02327.1;AC_000049;AC_000138;AK056554;AK122628;AK226098;AL035699;AL449363;AL833602;AY046419;BAB71214;BAB71214.1;BAG53629;BAG53629.1;BC070149;BX648889;CAD92514;CAD92514.2;CAI17977;CAI17977.1;CH471051;DB253903;EAW47994;EAW47994.1;NC_000006;NM_145176;NP_660159;NT_025741;NW_001838990;NW_923184;Q8TD20	B3KV17;Q7Z6U3;Q8TD20;Q96MR8	SLC2A12	solute carrier family 2 (facilitated glucose transporter), member 12	solute carrier family 2, facilitated glucose transporter member 12; glucose transporter type 12; GLUT-12; OTTHUMP00000017245	Solute carrier family 2, facilitated glucose transporter member 12	0.3189	0.009837
241	A_72_P354873	SMG7	9887	AC_000044;AC_000133;NC_000001;NG_007267;NM_001174061;NM_173156;NM_201568;NM_201569;NP_001167532;NP_775179;NP_963862;NP_963863;NT_004487;NW_001838533;NW_926128	AAH36381;AAH36381.1;AAH52565;AAH52565.1;AAR25620;AB085674;AC_000044;AC_000133;AK056035;AK074297;AK091477;AK297207;AK299178;AK307394;AL137800;AL355387;AL359876;AL449223;AL833675;AY386363;BAA13381;BAA13381.2;BAB71079;BAC03672;BAC53621;BAC53621.1;BAC53622;BAG59692;BAG61224;BC009281;BC015788;BC036381;BC052565;BM152501;CAI16625;CAI16626;CAI16627;CAI16627.1;CAI19476;CAI19477;CAI19478;CAI19484;CAI19485;…	Q5T1Q0;Q6PIE0;Q7Z7H9;Q8IXC1;Q8IXC2;Q92540	SMG7	smg-7 homolog, nonsense mediated mRNA decay factor (C. elegans)	OTTHUMP00000033244; protein SMG7; OTTHUMP00000217155; OTTHUMP00000217156; Smg-7 homolog, nonsense mediated mRNA decay factor (C. elegans); OTTHUMP00000033159; EST1-like protein C; EST1 telomerase component homolog C; OTTHUMP00000033245; chromosome 1 open reading frame 16; ever shorter telomeres 1C; breast cancer-associated antigen SGA-56M; OTTHUMP00000226607	Protein SMG7	0.5177	0.000509
242	A_72_P017506	SNRP116	9343	AC_000060;AC_000149;NC_000017;NM_001142605;NM_004247;NP_001136077;NP_004238;NT_010783;NW_001838437;NW_926839	AAH02360;AAH02360.1;ABM85527;ABW03758;AC015936;AC_000060;AC_000149;AJ505017;AK126193;AK126464;AK126652;AK128148;AK225335;AK293108;AK296367;AK297392;AK302828;AK316098;BAA04699;BAA04699.2;BAF85797;BAG54294;BAG54331;BAG59042;BAG59832;BAG64023;BAH14469;BC002360;BX647305;CAD43720;CAG33055;CH471178;CR456774;D21163;DC353274;DQ894601;EAW51573;EAW51573.1;EAW51574;EAW51574.1;EU176307;NC_000017;NM_001142605…	D3DX58;Q15029;Q9BUR0	EFTUD2	elongation factor Tu GTP binding domain containing 2	hSNU114; U5-116 kDa; 116 kDa U5 small nuclear ribonucleoprotein component; U5 snRNP-specific protein, 116 kDa; elongation factor Tu GTP-binding domain-containing protein 2; SNU114 homolog; U5 snRNP-specific protein, 116 kD; U5 snRNP specific protein, 116 kD	116 kDa U5 small nuclear ribonucleoprotein component	-0.3349	0.0009851
243	A_72_P294459;A_72_P216437;A_72_P351143	SNX10	29887	AC_000050;AC_000068;AC_000139;NC_000007;NM_001199835;NM_001199837;NM_001199838;NM_013322;NP_001186764;NP_001186766;NP_001186767;NP_037454;NR_037670;NT_007819;NT_079592;NW_001839003;NW_923240	AAD27833;AAD27833.1;AAH31050;AAH34992;AAH34992.1;AAS02029;AAS07476;ABM83346;ABM86560;AC004540;AC010677;AC074295;AC_000050;AC_000068;AC_000139;AF121860;AK296142;AK307905;AK309162;AK311256;AK312850;AK316088;BAG35703;BAG35703.1;BAG58882;BAH14459;BC031050;BC034992;BG399132;BJ995940;BM147840;BM147978;BX648363;CH236948;CH471073;CR612403;DQ892420;DQ895634;EAL24234;EAL24234.1;EAW93848;EAW93849;EAW93849.1…	Q8IYT5;Q9Y5X0	SNX10	sorting nexin 10	OTTHUMP00000202479; sorting nexin-10; OTTHUMP00000122522; OTTHUMP00000122521	Sorting nexin-10	0.4269	0.0001707
244	A_72_P039511	SPR	6697	AC_000045;AC_000134;NC_000002;NG_008234;NM_003124;NP_003115;NT_022184;NW_001838769;NW_927719	AAA60314;AAA60314.1;AAD14079;AAH17310;AAH17310.1;AAY14743;AAY15035;AAY15035.1;AB017547;AB017548;ABM82625;ABM85806;AC012366;AC092630;AC_000045;AC_000134;AK222942;AK291856;BAA34534;BAA34534.1;BAA34535;BAD96662;BAD96662.1;BAF84545;BAF84545.1;BC017310;BF434649;CH471053;DQ891699;DQ894880;EAW99757;EAW99757.1;EAW99758;EAW99758.1;M76231;NC_000002;NG_008234;NM_003124;NP_003115;NT_022184;NW_001838769;NW_92…	A8K741;D6W5H2;P35270;Q53GI9;Q9UBB1	SPR	sepiapterin reductase (7,8-dihydrobiopterin:NADP+ oxidoreductase)	short chain dehydrogenase/reductase family 38C, member 1; sepiapterin reductase; OTTHUMP00000160199	Sepiapterin reductase	0.2225	0.001245
245	A_72_P098926	SSR-alpha	6745	AC_000049;AC_000138;NC_000006;NM_003144;NP_003135;NT_007592;NW_001838973;NW_922984	AAD48778;AAD48778.1;AAH07710;AAH07710.1;AAP36051;AAP36051.1;ABM83677;ABW03544;AC_000049;AC_000138;AF156965;AJ420492;AK024294;AK025753;AK026687;AK075562;AK222762;AK222809;AK291550;AK312653;AL139095;BAC11701;BAC11701.1;BAD96482;BAD96482.1;BAD96529;BAD96529.1;BAF84239;BAF84239.1;BAG35536;BC007710;BT007387;CA424805;CAA78290;CAA78290.1;CAG33242;CAG33242.1;CAI16444;CAI16444.1;CH471087;CR456961;CR591675…	A8K685;P43307;Q53GX2;Q53H19;Q5TAM3;Q6IB43;Q8NBH9;Q96IA2;Q9TNQ8;Q9UN49	SSR1	signal sequence receptor, alpha	translocon-associated protein alpha subunit; SSR alpha subunit; SSR-alpha; translocon-associated protein subunit alpha; TRAP-alpha; OTTHUMP00000214000; OTTHUMP00000213998; OTTHUMP00000214001; OTTHUMP00000015998; TRAP alpha; OTTHUMP00000214008; OTTHUMP00000213999; signal sequence receptor subunit alpha	Translocon-associated protein subunit alpha	0.423	0.002265
246	A_72_P404853	SUCLG2	8801	AC_000046;AC_000135;NC_000003;NM_001177599;NM_003848;NP_001171070;NP_003839;NT_022459;NW_001838878;NW_921651	AAC64397;AAC64397.1;AAD20032;AAD20032.1;AAH07716;AAH07716.3;AAH19868;AAH19868.1;AAH35149;AAH47024;AAH47024.1;AAH68602;AAH68602.1;AC099783;AC112213;AC113169;AC114401;AC_000046;AC_000135;AF058954;AF131748;AK294598;AK310527;AL050226;BAH11821;BC007716;BC019868;BC035149;BC047024;BC068602;CAB43323;CH471055;CR592655;EAW65456;EAW65457;NC_000003;NM_001177599;NM_003848;NP_001171070;NP_003839;NT_022459;NW_0…	O95195;Q6NUH7;Q86VX8;Q8WUQ1;Q96I99	SUCLG2	succinate-CoA ligase, GDP-forming, beta subunit	GTP-specific succinyl-CoA synthetase beta subunit; GTP-specific succinyl-CoA synthetase subunit beta; succinyl-CoA ligase [GDP-forming] subunit beta, mitochondrial; SCS-betaG; OTTHUMP00000213364; succinyl-CoA synthetase, beta-G chain; OTTHUMP00000213363; succinyl-CoA ligase, GDP-forming, beta chain, mitochondrial; OTTHUMP00000213365; succinyl-CoA synthetase beta-G chain	Succinyl-CoA ligase [GDP-forming] subunit beta, mitochondrial	0.7992	0.009896
247	A_72_P013806	SYTC	6897	AC_000048;AC_000137;NC_000005;NM_152295;NP_689508;NT_006576;NW_001838929;NW_922562	AAB04939;AAB04939.1;AAH00517;AAH00517.2;AAH10578;AAH10578.2;AAH88355;ABM82342;ABM85516;AC025441;AC034231;ACE87131;AC_000048;AC_000137;AK095852;AK222804;AK292346;AK293620;AK296783;AK308342;AK315713;AW246273;BAD96524;BAF85035;BAF85035.1;BAG38072;BAG53144;BAG57079;BAG59361;BC000517;BC003699;BC010578;BC088355;BF028586;CH471118;CR598000;DQ891416;DQ894590;EAX10803;EAX10804;EAX10804.1;EU831444;M63180;NC…	A8K8I1;P26639;Q96FP5;Q9BWA6	TARS	threonyl-tRNA synthetase	threonyl-tRNA synthetase, cytoplasmic; OTTHUMP00000115851; OTTHUMP00000221016; threonine--tRNA ligase; OTTHUMP00000221018; threonine tRNA ligase 1, cytoplasmic	Threonyl-tRNA synthetase, cytoplasmic	-0.6294	0.005964
248	A_72_P380398	SYWM	10352	AC_000044;AC_000133;NC_000001;NM_015836;NM_201263;NP_056651;NP_957715;NT_032977;NW_001838594;NW_922462	AAH44575;AAH44575.1;AC_000044;AC_000133;ADQ32964;AJ242739;AK223197;AK296799;AK299547;AK300295;AK313740;AL139420;AL359823;AL590288;BAD96917;BAD96917.1;BAG36481;BAG36481.1;BAH12434;BAH13063;BAH13253;BC021722;BC039889;BC044575;BM834499;CAB63107;CAB63107.1;CAH71367;CAH71367.1;CAH71368;CAI21995;CAI21995.1;CAI21996;CAI22501;CAI22501.1;CAI22502;CH471122;CR590727;CR599172;CR621696;EAW56693;EAW56693.1;EAW…	B2R9D4;Q53FT4;Q5VUD2;Q86TQ0;Q9UGM6	WARS2	tryptophanyl tRNA synthetase 2, mitochondrial	(Mt)TrpRS; tryptophanyl-tRNA synthetase, mitochondrial; tryptophan--tRNA ligase; OTTHUMP00000014272; OTTHUMP00000014273; tryptophan tRNA ligase 2, mitochondrial; tryptophan-tRNA ligase	Tryptophanyl-tRNA synthetase, mitochondrial	0.3976	0.005372
249	A_72_P346288	Sec10	10640	AC_000057;AC_000146;NC_000014;NM_006544;NP_006535;NT_026437;NW_001838111;NW_925561	AA837306;AAB53388;AAB53388.1;AAF22027;AAH41126;AC_000057;AC_000146;AF118083;AK025802;AK295085;AK303531;AK312523;AL118623;AL139195;AL391152;AL833745;BAG35422;BAG35422.1;BAG58126;BAG64559;BC006976;BC020643;BC031298;BC041126;BI460915;BI461191;BM723045;CAH56255;CB145811;CH471061;CN268669;CR603207;CR607478;EAW80697;EAW80698;EAW80699;EAW80699.1;NC_000014;NM_006544;NP_006535;NT_026437;NW_001838111;NW_92…	B2R6C5;O00471	EXOC5	exocyst complex component 5	exocyst complex component Sec10; SEC10 (S. cerevisiae)-like 1; SEC10-like 1 (S. cerevisiae); SEC10-like 1	Exocyst complex component 5	-0.3312	0.003662
250	A_72_P385693	Serotonin receptor	3360	AC_000048;AC_000137;NC_000005;NG_029052;NM_000870;NM_001040169;NM_001040172;NM_001040173;NM_199453;NP_000861;NP_001035259;NP_001035262;NP_001035263;NP_955525;NT_029289;NW_001838953;NW_922784	AAH74755;AAH74755.1;AAH95497;AC008627;AC011390;AC091971;AC114939;AC_000048;AC_000137;AJ011371;AJ131724;AJ131725;AJ131726;AJ243213;AJ278979;AJ278980;AJ278981;AJ278982;AJ519673;AJ633645;AK308471;AM712912;BC074755;BC095497;CAA09600;CAA09600.1;CAA70002;CAA70002.1;CAA70774;CAA70774.1;CAA71462;CAA71462.1;CAA73107;CAA73107.1;CAA73108;CAA73108.1;CAA73109;CAA73109.1;CAA73911;CAA73911.1;CAA88167;CAA88167.1…	Q13639;Q96KH9;Q96KI0;Q9H199;Q9NY73;Q9UBM6;Q9UBT4;Q9UE22;Q9UE23;Q9UQR6	HTR4	5-hydroxytryptamine (serotonin) receptor 4	5-hydroxytryptamine receptor 4; OTTHUMP00000224250; OTTHUMP00000224252; OTTHUMP00000224281; OTTHUMP00000224282; OTTHUMP00000235919; OTTHUMP00000160384; OTTHUMP00000224254; OTTHUMP00000224307; cardiac 5-HT4 receptor		-0.3091	0.008304
251	A_72_P316048	Sgt1	11319	AC_000053;AC_000142;NC_000010;NM_001135752;NM_001135753;NM_007265;NP_001129224;NP_001129225;NP_009196;NR_024203;NT_030059;NW_001837987;NW_924796	AAH00721;AAH00721.1;ABM83098;ABM86292;AC016394;AC_000053;AC_000142;AK022616;AK225519;AK315711;BAA75199;BAA75199.1;BAG51097;BC000721;BC103720;BM763002;CAG33688;CH471083;CR457407;D88208;DA162516;DQ892172;DQ895366;EAW54477;EAW54478;NC_000010;NM_001135752;NM_001135753;NM_007265;NP_001129224;NP_001129225;NP_009196;NR_024203;NT_030059;NW_001837987;NW_924796;O95905;Q6I9U8	O95905	ECD	ecdysoneless homolog (Drosophila)	suppressor of GCR2; protein SGT1; protein ecdysoneless homolog; suppressor of S. cerevisiae gcr2; OTTHUMP00000019795	Protein SGT1	-0.3295	0.008737
252	A_72_P157666	Small 40S subunit	6217	AC_000062;AC_000151;NC_000019;NM_001020;NP_001011;NT_011109;NW_001838496;NW_927217	AAA60583;AAA60583.1;AAH04324;AAH04324.1;AAH07977;AAH07977.1;AAH71674;AB061841;ABM84375;ABM87218;AC011500;AC_000062;AC_000151;AK055869;AK315498;BAA05758;BAB79479;BAB79479.1;BAG37882;BAG37882.1;BC004324;BC007977;BC024970;BC071674;BC095429;BQ421722;CAR81492;CAS91508;CB107158;CB242275;CH471126;CR619874;D28392;DQ893449;DQ896219;EAW56892;EAW56893;EAW56894;EAW56894.1;EAW56895;FB342983;FB711106;M60854;NC…	B2RDD5;P17008;P62249	RPS16	ribosomal protein S16	40S ribosomal protein S16		0.807	8.42e-05
253	A_72_P256152	Stromelysin-1	4314	AC_000054;AC_000143;NC_000011;NG_012100;NM_002422;NP_002413;NT_033899;NW_001838042;NW_925173	AAA36321;AAA36321.1;AAB36942;AAB36942.1;AAH69676;AAH69676.1;AAH69716;AAH69716.1;AAH74815;AAH74815.1;AAH74869;AAH74869.1;AAI05955;AAI05955.1;AAI07491;AAI07491.1;AAI07492;AAI07492.1;AAK95247;AAK95247.1;AAN86644;AAO65616;AC_000054;AC_000143;ADQ31916;AF405705;AI628953;AK223283;AK223291;AK313310;AP000789;BAD97003;BAD97003.1;BAD97011;BAD97011.1;BAG36115;BAG36115.1;BC069676;BC069716;BC074815;BC074869;BC…	B2R8B8;P08254;Q3B7S0;Q6GRF8	MMP3	matrix metallopeptidase 3 (stromelysin 1, progelatinase)	stromelysin-1; matrix metalloproteinase-3; OTTHUMP00000045949; matrix metalloproteinase 3 (stromelysin 1, progelatinase); transin-1; proteoglycanase	Stromelysin-1	-0.4641	0.001323
254	A_72_P225177	Syntaxin 10	8677	AC_000062;AC_000151;NC_000019;NM_003765;NP_003756;NT_011295;NW_001838483;NW_927195	AAC05087;AAC05087.1;AAH17237;AAH17237.1;AAV48594;AC011446;AC_000062;AC_000151;AF035531;AY778966;BC017237;BC095459;CAG33391;CAG33391.1;CH471106;CR457110;CR601641;CR614578;CR622979;EAW84356;EAW84357;NC_000019;NM_003765;NP_003756;NT_011295;NW_001838483;NW_927195;O60499;Q5U8S2	A6NC41;O60499;Q6IAP4;Q96AE8	STX10	syntaxin 10	syntaxin-10	Syntaxin-10	0.2761	0.003208
255	A_72_P069846	TAFs	6880	AC_000048;AC_000137;NC_000005;NM_001015891;NM_001015892;NM_003187;NM_016283;NP_001015891;NP_001015892;NP_003178;NP_057367;NT_006713;NW_001838935;NW_003315917;NW_922618	AAA84389;AAA84389.1;AAA91318;AAA91318.1;AAC50153;AAC50153.1;AAD34132;AAD34132.1;AAF14860;AAF14860.1;AAH03400;AAH03400.1;AAH07349;AAH07349.1;AAH07426;AAH07426.1;AAH33320;AAH33320.1;AAN84793;AAN84793.1;AAV38458;AAV38458.1;AC145132;AC145145;ACE86721;ACE87407;AC_000048;AC_000137;AF110777;AF151895;AI879232;AJ878880;AJ878881;AY189986;BC003400;BC007349;BC007426;BC033320;BG490028;BG720149;BT019652;BX1178…	A8MSZ6;D3DWA3;Q16594;Q5F2S9;Q5U0D1;Q9BTS1;Q9Y3D8	TAF9	TAF9 RNA polymerase II, TATA box binding protein (TBP)-associated factor, 32kDa	coilin-interacting nuclear ATPase protein; transcription initiation factor TFIID subunit 9; adenylate kinase isoenzyme 6; RNA polymerase II TBP-associated factor subunit G; TAFII-32; TAFII-31; STAF31/32; TATA box binding protein (TBP)-associated factor, RNA polymerase II, G, 32kD; coilin interacting protein; OTTHUMP00000125196; transcription initiation factor TFIID 31 kD subunit; OTTHUMP000002221…		-0.6039	0.007141
256	A_72_P100131	TAS1R3	83756	AC_000044;AC_000133;NC_000001;NG_008048;NM_152228;NP_689414;NT_004350;NW_001838585;NW_921350	AAI52913;AB065647;AC026283;AC_000044;AC_000133;AK122959;AL139287;BAC05873;BAC05873.1;BC152912;BK000152;CAI23184;CAI23184.1;CAL69810;CAS03328;CAS03502;CAV33588;CBJ18622;CH471183;CS448306;DAA00013;DAA00013.1;EAW56228;FB676147;FB701756;GM692547;HC305278;NC_000001;NG_008048;NM_152228;NP_689414;NT_004350;NW_001838585;NW_921350;Q7RTX0	Q5TA49;Q7RTX0;Q8NGW9	TAS1R3	taste receptor, type 1, member 3	sweet taste receptor T1R3; OTTHUMP00000003108; taste receptor type 1 member 3	Taste receptor type 1 member 3	0.6185	0.007766
257	A_72_P313538	TBRG4	9238	AC_000050;AC_000068;AC_000139;NC_000007;NM_004749;NM_030900;NM_199122;NP_004740;NP_112162;NP_954573;NT_007819;NT_079592;NW_001839004;NW_923273	AAB69312;AAB69312.1;AAH02732;AAH02732.2;AAH14918;AAH14918.1;AAH17235;AAH17235.1;AB023165;ABM85092;AC013416;AC_000050;AC_000068;AC_000139;AF011792;AK001281;AK022575;AK092132;AK222943;AK298155;AK300489;AL833840;BAA76792;BAA76792.2;BAD96663;BAD96663.1;BAG50885;BAG51095;BAG52486;BAG62204;BAH12734;BC002732;BC014918;BC017235;BG703429;CAD38700;CAD38700.1;CH236960;CH471128;CR602383;CR618918;CR620307;CR62…	A4D2L2;A4D2L3;D3DVL5;D3DVL6;O14710;Q53GI8;Q8NDM4;Q969Z0;Q9BUC6;Q9Y2F6	TBRG4	transforming growth factor beta regulator 4	OTTHUMP00000159556; OTTHUMP00000214261; FAST kinase domain-containing protein 4; cell cycle progression restoration protein 2; H_TD2522F11.8; protein TBRG4; cell cycle progression protein 2; OTTHUMP00000159555; OTTHUMP00000159557; cell cycle progression 2 protein; FAST kinase domains 4	Protein TBRG4	0.5003	0.001922
258	A_72_P236172	TCP10L	140290	AC_000064;AC_000153;NC_000021;NM_144659;NP_653260;NT_011512;NW_001838706;NW_927384	AAH27970;AAH27970.1;AAH33855;AAH33855.1;AAM18531;AAM18531.1;AC_000064;AC_000153;ADQ31627;AF115967;AK001794;AK058078;AK223529;AP000274;AP000275;AP001714;BAA91915;BAA91915.1;BAB71653;BAB71653.1;BAD97249;BAD97249.1;BC022024;BC027970;BC033855;BG717680;BG721020;BI829783;BX111775;CB243926;CH471079;EAX09869;HQ447140;NC_000021;NM_144659;NP_653260;NT_011512;NW_001838706;NW_927384;Q8TDR4	Q53EW0;Q8N366;Q8TDR4;Q96LN5;Q9NV44	TCP10L	t-complex 10 (mouse)-like	T-complex 10A-2; T-complex protein 10A-2; T-complex protein 10A homolog 2; TCP10-like; t-complex 10 (a murine tcp homolog)-like; OTTHUMP00000067368	T-complex protein 10A homolog 2	0.4726	0.001227
259	A_72_P069846	TFIID	6880	AC_000048;AC_000137;NC_000005;NM_001015891;NM_001015892;NM_003187;NM_016283;NP_001015891;NP_001015892;NP_003178;NP_057367;NT_006713;NW_001838935;NW_003315917;NW_922618	AAA84389;AAA84389.1;AAA91318;AAA91318.1;AAC50153;AAC50153.1;AAD34132;AAD34132.1;AAF14860;AAF14860.1;AAH03400;AAH03400.1;AAH07349;AAH07349.1;AAH07426;AAH07426.1;AAH33320;AAH33320.1;AAN84793;AAN84793.1;AAV38458;AAV38458.1;AC145132;AC145145;ACE86721;ACE87407;AC_000048;AC_000137;AF110777;AF151895;AI879232;AJ878880;AJ878881;AY189986;BC003400;BC007349;BC007426;BC033320;BG490028;BG720149;BT019652;BX1178…	A8MSZ6;D3DWA3;Q16594;Q5F2S9;Q5U0D1;Q9BTS1;Q9Y3D8	TAF9	TAF9 RNA polymerase II, TATA box binding protein (TBP)-associated factor, 32kDa	coilin-interacting nuclear ATPase protein; transcription initiation factor TFIID subunit 9; adenylate kinase isoenzyme 6; RNA polymerase II TBP-associated factor subunit G; TAFII-32; TAFII-31; STAF31/32; TATA box binding protein (TBP)-associated factor, RNA polymerase II, G, 32kD; coilin interacting protein; OTTHUMP00000125196; transcription initiation factor TFIID 31 kD subunit; OTTHUMP000002221…		-0.6039	0.007141
260	A_72_P069846	TFIID 31 kDa subunit	6880	AC_000048;AC_000137;NC_000005;NM_001015891;NM_001015892;NM_003187;NM_016283;NP_001015891;NP_001015892;NP_003178;NP_057367;NT_006713;NW_001838935;NW_003315917;NW_922618	AAA84389;AAA84389.1;AAA91318;AAA91318.1;AAC50153;AAC50153.1;AAD34132;AAD34132.1;AAF14860;AAF14860.1;AAH03400;AAH03400.1;AAH07349;AAH07349.1;AAH07426;AAH07426.1;AAH33320;AAH33320.1;AAN84793;AAN84793.1;AAV38458;AAV38458.1;AC145132;AC145145;ACE86721;ACE87407;AC_000048;AC_000137;AF110777;AF151895;AI879232;AJ878880;AJ878881;AY189986;BC003400;BC007349;BC007426;BC033320;BG490028;BG720149;BT019652;BX1178…	A8MSZ6;D3DWA3;Q16594;Q5F2S9;Q5U0D1;Q9BTS1;Q9Y3D8	TAF9	TAF9 RNA polymerase II, TATA box binding protein (TBP)-associated factor, 32kDa	coilin-interacting nuclear ATPase protein; transcription initiation factor TFIID subunit 9; adenylate kinase isoenzyme 6; RNA polymerase II TBP-associated factor subunit G; TAFII-32; TAFII-31; STAF31/32; TATA box binding protein (TBP)-associated factor, RNA polymerase II, G, 32kD; coilin interacting protein; OTTHUMP00000125196; transcription initiation factor TFIID 31 kD subunit; OTTHUMP000002221…	Transcription initiation factor TFIID subunit 9	-0.6039	0.007141
261	A_72_P069846	TFTC complex	6880	AC_000048;AC_000137;NC_000005;NM_001015891;NM_001015892;NM_003187;NM_016283;NP_001015891;NP_001015892;NP_003178;NP_057367;NT_006713;NW_001838935;NW_003315917;NW_922618	AAA84389;AAA84389.1;AAA91318;AAA91318.1;AAC50153;AAC50153.1;AAD34132;AAD34132.1;AAF14860;AAF14860.1;AAH03400;AAH03400.1;AAH07349;AAH07349.1;AAH07426;AAH07426.1;AAH33320;AAH33320.1;AAN84793;AAN84793.1;AAV38458;AAV38458.1;AC145132;AC145145;ACE86721;ACE87407;AC_000048;AC_000137;AF110777;AF151895;AI879232;AJ878880;AJ878881;AY189986;BC003400;BC007349;BC007426;BC033320;BG490028;BG720149;BT019652;BX1178…	A8MSZ6;D3DWA3;Q16594;Q5F2S9;Q5U0D1;Q9BTS1;Q9Y3D8	TAF9	TAF9 RNA polymerase II, TATA box binding protein (TBP)-associated factor, 32kDa	coilin-interacting nuclear ATPase protein; transcription initiation factor TFIID subunit 9; adenylate kinase isoenzyme 6; RNA polymerase II TBP-associated factor subunit G; TAFII-32; TAFII-31; STAF31/32; TATA box binding protein (TBP)-associated factor, RNA polymerase II, G, 32kD; coilin interacting protein; OTTHUMP00000125196; transcription initiation factor TFIID 31 kD subunit; OTTHUMP000002221…		-0.6039	0.007141
262	A_72_P077506	TGF-beta receptor type III (betaglycan)	7049	AC_000044;AC_000133;NC_000001;NG_027757;NM_001195683;NM_001195684;NM_003243;NP_001182612;NP_001182613;NP_003234;NR_036634;NT_032977;NW_001838589;NW_921795	AAA67061;AAA67061.1;AAI26117;AAI26117.1;AAI36296;AAI36296.1;AAV50003;AAV50003.1;AC099334;AC114486;AC_000044;AC_000133;AI090023;AJ251961;AK225799;AK291345;AL162263;AL390780;AL445992;AY796304;BAF84034;BC099914;BC126116;BC136295;BC143869;BX090279;CA406273;CAB64374;CAB64374.1;CAI13392;CAI13392.1;CAI13393;CAI13393.1;CAI14570;CAI14570.1;CAI14571;CAI14571.1;CAI22636;CAI22636.1;CAI22637;CAI22637.1;CH4710…	A0AUW8;B9EG88;Q03167;Q5T2T4;Q5U731;Q9UGI2	TGFBR3	transforming growth factor, beta receptor III	TGF-beta receptor type III; TGFR-3; transforming growth factor beta receptor type 3; TGF-beta receptor type 3; OTTHUMP00000011787; transforming growth factor, beta receptor III (betaglycan, 300kDa); betaglycan proteoglycan; OTTHUMP00000011807; OTTHUMP00000228692	Transforming growth factor beta receptor type 3	-0.5936	0.009017
263	A_72_P368263	TGM1	7051	AC_000057;AC_000146;NC_000014;NG_007150;NM_000359;NP_000350;NT_026437;NW_001838110;NW_925539	AAA59474;AAA59474.1;AAA61156;AAA61156.1;AAA61166;AAA61166.1;AAA96667;AAA96667.1;AAH34699;AAH34699.1;ABF70204;ABF70204.1;ABM82411;ABW03400;AC_000057;AC_000146;AK291350;AK299436;AK301652;AK315819;AK315828;AK315843;AL096870;BAA14329;BAA14329.1;BAA34203;BAA34203.1;BAF84039;BAF98710;BAF98719;BAF98734;BAF98734.1;BAG61413;BAG63129;BC034699;CAA41040;CAA41040.1;CH471078;D10353;D90287;DA437895;DQ640500;DQ8…	P22735;Q197M4	TGM1	transglutaminase 1 (K polypeptide epidermal type I, protein-glutamine-gamma-glutamyltransferase)	epidermal TGase; transglutaminase-1; TG(K); TGase-1; transglutaminase, keratinocyte; transglutaminase K; OTTHUMP00000164684; TGase K; protein-glutamine gamma-glutamyltransferase K	Protein-glutamine gamma-glutamyltransferase K	0.7202	0.008953
264	A_72_P248182	TIA-1	7072	AC_000045;AC_000134;NC_000002;NM_022037;NM_022173;NP_071320;NP_071505;NT_022184;NW_001838769;NW_927719	AAD14053;AAD14053.1;AAH15944;AAX93193;AAX93193.1;AB209211;AC016700;AC_000045;AC_000134;AK093744;AK303345;BAD92448;BAG64407;BC015944;BM146739;CH471053;CN295707;CR597363;CR607569;CX867570;DB136383;DR157578;EAW99823;EAW99824;EAW99824.1;EAW99825;EAW99826;EAW99827;M77142;NC_000002;NM_022037;NM_022173;NP_071320;NP_071505;NT_022184;NW_001838769;NW_927719;P31483;Q59G98;Q96B58;S70114	P31483;Q53SS9	TIA1	TIA1 cytotoxic granule-associated RNA binding protein	OTTHUMP00000204010; T-cell-restricted intracellular antigen-1; nucleolysin TIA-1 isoform p40; TIA1 cytotoxic granule-associated RNA-binding protein; OTTHUMP00000160047; OTTHUMP00000160046; p40-TIA-1 (containing p15-TIA-1); cytotoxic granule-associated RNA-binding protein; OTTHUMP00000204044; RNA-binding protein TIA-1	Nucleolysin TIA-1 isoform p40	-0.3127	0.006219
265	A_72_P256237	TIM9 B	26515	AC_000054;AC_000143;NC_000011;NM_012192;NP_036324;NT_009237;NW_001838021;NW_925006	AAD40011;AAD40011.1;AAF15105;AAF15105.1;AAG09684;AAG09684.1;AAH11014;AAH11014.1;AC084337;AC_000054;AC_000143;AF150105;AF152355;AF183415;AI052126;AK002130;AK058048;AK311763;BAG34706;BAG51018;BC011014;CH471064;CR595140;CR599487;CR607360;DA290694;EAW68706;NC_000011;NM_012192;NP_036324;NT_009237;NW_001838021;NW_925006;Q9Y5J6	Q96FF3;Q9Y5J6	FXC1	fracture callus 1 homolog (rat)	OTTHUMP00000230720; fracture callus protein 1; mitochondrial import inner membrane translocase subunit Tim9 B; fracture callus 1 (rat) homolog; OTTHUMP00000164584	Mitochondrial import inner membrane translocase subunit Tim9 B	0.5094	0.007256
266	A_72_P383393	TIP30	10553	AC_000054;AC_000143;NC_000011;NM_001098520;NM_001098521;NM_001098522;NM_001098523;NM_006410;NP_001091990;NP_001091991;NP_001091992;NP_001091993;NP_006401;NT_009237;NW_001838022;NW_925006	AAB84360;AAB84360.1;AAC39694;AAC39694.1;AAC78331;AAC78331.1;AAH02439;AAH02439.2;AAH15358;AAH15358.1;ABZ92511;AC025972;AC_000054;AC_000143;AF039103;AF092095;AI193677;AK130473;AK222969;AK223010;AK292092;AW963626;BAD96689;BAD96689.1;BAD96730;BAD96730.1;BAF84781;BAF84781.1;BC002439;BC015358;BF681178;BP382529;CAG33102;CAG33102.1;CH471064;CR456821;DB450790;EAW68337;EAW68338;EAW68338.1;EAW68339;EAW68339…	A8K7S7;D3DQY8;O15383;O60520;O95345;Q53GC1;Q53GG2;Q6IBI3;Q9BUP3	HTATIP2	HIV-1 Tat interactive protein 2, 30kDa	short chain dehydrogenase/reductase family 44U, member 1; oxidoreductase HTATIP2; HIV-1 TAT-interactive protein 2; HIV-1 Tat interactive protein 2, 30 kDa; OTTHUMP00000231705; OTTHUMP00000231704; OTTHUMP00000231706; Tat-interacting protein (30kD); 30 kDa HIV-1 TAT-interacting protein; OTTHUMP00000231707; OTTHUMP00000232023; OTTHUMP00000231703	Oxidoreductase HTATIP2	-0.7101	0.009464
267	A_72_P237452	TMEM113	80335	AC_000046;AC_000135;NC_000003;NM_025222;NP_079498;NT_022517;NW_001838877;NW_921651	AAG35553;AAH11760;AAH18941;AAQ13620;AAQ88631;AAQ88631.1;AC092045;AC_000046;AC_000135;AF132207;AF173977;AI478905;AK074290;AK098435;AK123860;AK130177;AK291380;AY358264;BAB85039;BAB85039.1;BAF84069;BAF84069.1;BC011760;BC018941;BX648628;CH471055;CR604741;CR612750;CR616060;DB500464;EAW65202;EAW65202.1;EAW65203;NC_000003;NM_025222;NP_079498;NT_022517;NW_001838877;NW_921651;Q6UXN9	A8K5R5;Q6UXN9;Q8TEB2	WDR82	WD repeat domain 82	transmembrane protein 113; WD repeat-containing protein 82; OTTHUMP00000197255	WD repeat-containing protein 82	0.4194	0.004924
268	A_72_P026606	TMEM182	130827	AC_000045;AC_000134;NC_000002;NM_144632;NP_653233;NT_022171;NW_001838818;NW_928052	AAH20898;AAH20898.1;AAH73844;AAH73844.1;AAI07695;AAI07695.1;AAI30307;AAI30307.1;AAI30309;AAI30309.1;AAQ88629;AAQ88629.1;AAY14911;AAY14911.1;AC007251;AC_000045;AC_000134;ADR82867;AK054856;AK129862;AL832688;AY358262;BAB70815;BAB70815.1;BAC85244;BAC85244.1;BC020898;BC073844;BC107694;BC130306;BC130308;CH471127;CR936731;CR936732;CR936735;EAX01785;EAX01786;HQ258113;NC_000002;NM_144632;NP_653233;NT_0221…	C9JML7;Q3B7B8;Q53TT9;Q6GMU0;Q6ZP80;Q8WW45;Q96NR4	TMEM182	transmembrane protein 182	OTTHUMP00000161339	Transmembrane protein 182	-0.256	0.006741
269	A_72_P177266	TMEM20	159371	AC_000053;AC_000142;NC_000010;NM_001134658;NM_153226;NP_001128130;NP_694958;NT_030059;NW_001838005;NW_924884	AAH41432;AAH41432.1;AAI04815;AAI04815.1;AAI43285;AC_000053;AC_000142;AK091309;AL138923;BAC03633;BAC03633.1;BC036382;BC041432;BC047102;BC104814;BC143284;CAH73399;CAH73399.1;CH471066;EAW50046;EAW50047;EAW50048;EAW50049;NC_000010;NM_001134658;NM_153226;NP_001128130;NP_694958;NT_030059;NW_001838005;NW_924884;Q2M3R5	Q2M3R5;Q86YG5;Q8NBA5	TMEM20	transmembrane protein 20	OTTHUMP00000020123	Transmembrane protein 20	-0.2659	0.007052
270	A_72_P241582	TRF1	7013	AC_000051;AC_000140;NC_000008;NG_029121;NM_003218;NM_017489;NP_003209;NP_059523;NT_008183;NW_001839132;NW_923929	AAB17975.1;AAB53363;AAB53363.1;AAB54036;AAB54036.1;AAB81137;AAB81137.1;AAH29378;AAH29378.1;AAT81150;ABM83499;ABM86715;ABV02580;ABV02580.1;AC022893;AC_000051;AC_000140;AF003001;AI218408;AK123410;AK292529;AY576778;BAF85218;BC014646;BC029378;BC071975;BF056993;CAA63768;CAA63768.1;CH471068;CX788828;DA658766;DQ892573;DQ895789;EAW86990;EAW86991;EAW86992;EAW86993;EAW86994;EU088287;NC_000008;NG_029121;NM_…	A7XP29;P54274;Q15553;Q8NHT6;Q93029	TERF1	telomeric repeat binding factor (NIMA-interacting) 1	TTAGGG repeat-binding factor 1; telomeric protein Pin2/TRF1; telomeric repeat-binding factor 1; NIMA-interacting protein 2; OTTHUMP00000226890; OTTHUMP00000226889	Telomeric repeat-binding factor 1	-0.4134	0.009813
271	A_72_P166651	TTDN1	136647	AC_000050;AC_000068;AC_000139;NC_000007;NG_016989;NG_023422;NM_138701;NP_619646;NT_007819;NT_079592;NW_001839004;NW_923240	AAH26265;AAH26265.1;AC006023;AC_000050;AC_000068;AC_000139;ADQ32251;AK290098;AX048113;BAF82787;BC026265;BG501110;CH236951;CH471073;CR617993;CR618070;EAL23999;EAW94134;HQ447766;NC_000007;NG_016989;NG_023422;NM_138701;NP_619646;NT_007819;NT_079592;NW_001839004;NW_923240;Q8TAP9	Q8TAP9	C7orf11	chromosome 7 open reading frame 11	TTD non-photosensitive 1 protein; Russell-Silver syndrome region; OTTHUMP00000159010	TTD non-photosensitive 1 protein	-0.3255	0.008493
272	A_72_P233402	TTYH1	57348	AC_000062;AC_000151;NC_000019;NM_001005367;NM_001201461;NM_020659;NP_001005367;NP_001188390;NP_065710;NT_011109;NW_001838498;NW_927284	AAG02580;AAG02580.1;AAH11347;AAH11347.1;AAH19358;AAH19358.1;AB162930;AB188496;AC008746;AC_000062;AC_000151;AF177909;AK126690;AK289468;AK293468;BAC86645;BAC86645.1;BAD20189;BAD20189.1;BAD37142;BAD37142.1;BAF82157;BAF82157.1;BAH11515;BC011347;BC019358;BC065919;BU737336;BX402889;CAQ08949;CAQ08949.1;CAQ08950;CAQ08950.1;CAQ08951;CAQ08951.1;CAQ08952;CAQ52428;CAQ52428.1;CAQ52429;CAQ52429.1;CAQ52430;CAQ5…	B0VJY3;B0VJY4;B0VJY5;B2VAL9;Q5U682;Q68A17;Q6L750;Q6ZTE5;Q8WUU2;Q9H313	TTYH1	tweety homolog 1 (Drosophila)	protein tweety homolog 1; hTTY1; tweety (Drosophila) homolog 1; OTTHUMP00000068178; OTTHUMP00000068179; OTTHUMP00000068180	Protein tweety homolog 1	0.5497	0.0005441
273	A_72_P303184	TYW3	127253	AC_000044;AC_000133;NC_000001;NM_001162916;NM_138467;NP_001156388;NP_612476;NR_027962;NT_032977;NW_001838579;NW_921351	AAH09514;AAH71765;AAH71765.1;AC091611;AC_000044;AC_000133;AK098237;AK294264;AK299849;AK311272;BAC05267;BAC05267.1;BAG57557;BAG61711;BC009514;BC032341;BC071765;BM680331;BX647591;CAI46106;CAI46106.1;CH471059;CR617954;DA033034;EAX06408;NC_000001;NM_001162916;NM_138467;NP_001156388;NP_612476;NR_027962;NT_032977;NW_001838579;NW_921351;Q6IPR3	Q5HYJ0;Q6IPR3;Q8N7L1	TYW3	tRNA-yW synthesizing protein 3 homolog (S. cerevisiae)	tRNA-yW-synthesizing protein 3; tRNA wybutosine-synthesizing protein 3 homolog; chromosome 1 open reading frame 171; OTTHUMP00000011215	tRNA wybutosine-synthesizing protein 3 homolog	0.7316	0.003621
274	A_72_P245257	Tctn2	79867	AC_000055;AC_000144;NC_000012;NG_012743;NM_001143850;NM_024809;NP_001137322;NP_079085;NT_009755;NW_001838064;NW_925395	AAH09112;AAH09112.1;ABB90562;ABB90562.1;AC117503;AC_000055;AC_000144;AK023037;AK056924;AK292153;BAB14370;BAB14370.1;BAF84842;BAG51827;BAG51827.1;BC009112;CH471054;DQ278870;EAW98430;EAW98430.1;NC_000012;NG_012743;NM_001143850;NM_024809;NP_001137322;NP_079085;NT_009755;NW_001838064;NW_925395;Q96GX1	B3KPW5;Q96GX1;Q9H966	TCTN2	tectonic family member 2	tectonic-2; tectonic 2; chromosome 12 open reading frame 38; Meckel syndrome, type 8; OTTHUMP00000239215; OTTHUMP00000239216	Tectonic-2	0.2352	0.009553
275	A_72_P035411	TfR1	7037	AC_000046;AC_000135;NC_000003;NM_001128148;NM_003234;NP_001121620;NP_003225;NT_029928;NW_001838889;NW_921873	AAA61153;AAA61153.1;AAF04564;AAF04564.1;AAH01188;AAH01188.1;AB209254;ABF47088;ABF47088.1;ABM83785;ABM87107;AC024937;AC_000046;AC_000135;AF187320;AK291723;AK294758;AK309923;BAD92491;BAD92491.1;BAF84412;BAH11872;BC001188;BX537966;CAA25527;CAA25527.1;CAD97930;CH471191;CK724857;CR595511;DA460386;DQ496099;DQ892859;DQ896108;DT219054;EAW53670;EAW53670.1;EAW53671;EAW53672;EAW53673;EAW53673.1;M11507;NC_00…	D3DXB0;P02786;Q1HE24;Q59G55;Q9UCN0;Q9UCU5;Q9UDF9;Q9UK21	TFRC	transferrin receptor (p90, CD71)	OTTHUMP00000208524; p90; transferrin receptor protein 1; TR; OTTHUMP00000208525; OTTHUMP00000208523; T9	Transferrin receptor protein 1	-1.58	7.7e-05
276	A_72_P207037	Thymosin beta-10	9168	AC_000045;AC_000134;NC_000002;NM_021103;NP_066926;NT_022184;NW_001838769;NW_927719	AAA36744;AAA36744.1;AAA36746;AAA36746.1;AAB25225;AAB25225.1;AAC41691;AAC41691.1;AAH16025;AAH16025.1;AAH16731;AAH16731.1;AAS47517;AAY24191;AC022210;ACE86535;ACE86919;ACE87214;ACE87606;AC_000045;AC_000134;AK130949;AK311952;AY453400;BAG34892;BC016025;BC016731;BC107889;CH471053;CR595675;EAW99547;EAW99548;EU831614;EU831701;EU832349;EU832434;M20259;M92381;M92383;NC_000002;NM_021103;NP_066926;NT_022184;…	P13472;P63313	TMSB10	thymosin beta 10	thymosin beta-10; OTTHUMP00000160498; migration-inducing gene 12; migration-inducing protein 12	Thymosin beta-10	-0.4033	0.005685
277	A_72_P026606	Transmembrane protein 182 precursor	130827	AC_000045;AC_000134;NC_000002;NM_144632;NP_653233;NT_022171;NW_001838818;NW_928052	AAH20898;AAH20898.1;AAH73844;AAH73844.1;AAI07695;AAI07695.1;AAI30307;AAI30307.1;AAI30309;AAI30309.1;AAQ88629;AAQ88629.1;AAY14911;AAY14911.1;AC007251;AC_000045;AC_000134;ADR82867;AK054856;AK129862;AL832688;AY358262;BAB70815;BAB70815.1;BAC85244;BAC85244.1;BC020898;BC073844;BC107694;BC130306;BC130308;CH471127;CR936731;CR936732;CR936735;EAX01785;EAX01786;HQ258113;NC_000002;NM_144632;NP_653233;NT_0221…	C9JML7;Q3B7B8;Q53TT9;Q6GMU0;Q6ZP80;Q8WW45;Q96NR4	TMEM182	transmembrane protein 182	OTTHUMP00000161339	Transmembrane protein 182	-0.256	0.006741
278	A_72_P224487	Tubulin gamma	27175	AC_000060;AC_000149;NC_000017;NM_016437;NP_057521;NT_010783;NW_001838436;NW_926828	AAF34188;AAF34188.1;AAH09670;AAH09670.1;AAH51890;AAH51890.1;AAI08740;AAI08740.1;AC067852;AC_000060;AC_000149;AF225971;AK022324;AK225134;BAB14012;BAB14012.1;BC009670;BC051890;BC052283;BC108739;CR602914;CR605839;CR611337;CR611393;CR615504;CR623455;CR623937;DC353745;NC_000017;NM_016437;NP_057521;NT_010783;NW_001838436;NW_926828;Q9NRH3	A6NDI4;Q32NB2;Q9NRH3	TUBG2	tubulin, gamma 2	gamma-2-tubulin; tubulin gamma-2 chain		0.323	0.008154
279	A_72_P224487	Tubulin gamma 2	27175	AC_000060;AC_000149;NC_000017;NM_016437;NP_057521;NT_010783;NW_001838436;NW_926828	AAF34188;AAF34188.1;AAH09670;AAH09670.1;AAH51890;AAH51890.1;AAI08740;AAI08740.1;AC067852;AC_000060;AC_000149;AF225971;AK022324;AK225134;BAB14012;BAB14012.1;BC009670;BC051890;BC052283;BC108739;CR602914;CR605839;CR611337;CR611393;CR615504;CR623455;CR623937;DC353745;NC_000017;NM_016437;NP_057521;NT_010783;NW_001838436;NW_926828;Q9NRH3	A6NDI4;Q32NB2;Q9NRH3	TUBG2	tubulin, gamma 2	gamma-2-tubulin; tubulin gamma-2 chain	Tubulin gamma-2 chain	0.323	0.008154
280	A_72_P202627	UBC6	118424	AC_000044;AC_000133;NC_000001;NM_058167;NM_194315;NM_194457;NM_194458;NP_477515;NP_919296;NP_919439;NP_919440;NT_004350;NW_001838585;NW_921350	AAH94777;AAH94777.1;AAI04891;AAI04891.1;AAI13431;AAI13431.1;AAI43658;AAI43658.1;AAK52609;AAK52609.1;AC_000044;AC_000133;ADR83504;AF296658;AK056065;AK075017;AK098803;AK291935;AL162741;AL555293;AW411508;BAB71086;BAB71086.1;BAC11355;BAC11355.1;BAF84624;BAF84624.1;BC027728;BC052579;BC094777;BC104890;BC113430;BC143657;BE382927;BE515187;BG112933;BG499172;BG717336;BM544827;BM765278;BM794599;BM926567;BQ8…	Q504T9;Q8N2K1;Q96N26;Q96T84	UBE2J2	ubiquitin-conjugating enzyme E2, J2	ubiquitin-conjugating enzyme E2 J2; ubiquitin-conjugating enzyme E2, J2 (UBC6 homolog, yeast); OTTHUMP00000002077; non-canonical ubiquitin-conjugating enzyme 2; OTTHUMP00000220526; OTTHUMP00000220527; OTTHUMP00000001907; OTTHUMP00000002078; yeast UBC6 homolog; ubiquitin conjugating enzyme E2, J2; ubiquitin conjugating enzyme 6		0.2483	0.008126
281	A_72_P362408	UBE1	7317	AC_000066;AC_000155;NC_000023;NG_009161;NG_012517;NG_021353;NM_003334;NM_153280;NP_003325;NP_695012;NT_079573;NW_001842362;NW_927702	AAA61246;AAA61246.1;AAG23769;AAH13041;AAH13041.1;ABW03513;ABW03826;AC_000066;AC_000155;AF258566;AJ003111;AK097343;AK131341;AK293161;AK296866;AL513366;BAG53454;BAG56705;BAG59429;BC009900;BC013041;BC020261;BG703038;BI547207;CAA05866;CAA37078;CAA37078.1;CAA40296;CAA40296.1;CAI41703;CAI41704;CAI41705;CAI41706;CAI41707;CAI41708;CAI41708.1;CAI41710;CH471164;CR594399;CR596473;CR600825;CR621823;EAW59290;…	P22314;Q5JRR8;Q96E13	UBA1	ubiquitin-like modifier activating enzyme 1	ubiquitin-like modifier-activating enzyme 1; POC20 centriolar protein homolog; ubiquitin-activating enzyme E1 (A1S9T and BN75 temperature sensitivity complementing); ubiquitin-activating enzyme E1; UBA1, ubiquitin-activating enzyme E1 homolog A; OTTHUMP00000023198; OTTHUMP00000023197; A1S9T and BN75 temperature sensitivity complementing	Ubiquitin-like modifier-activating enzyme 1	0.332	0.003767
282	A_72_P202627	UBE2J2	118424	AC_000044;AC_000133;NC_000001;NM_058167;NM_194315;NM_194457;NM_194458;NP_477515;NP_919296;NP_919439;NP_919440;NT_004350;NW_001838585;NW_921350	AAH94777;AAH94777.1;AAI04891;AAI04891.1;AAI13431;AAI13431.1;AAI43658;AAI43658.1;AAK52609;AAK52609.1;AC_000044;AC_000133;ADR83504;AF296658;AK056065;AK075017;AK098803;AK291935;AL162741;AL555293;AW411508;BAB71086;BAB71086.1;BAC11355;BAC11355.1;BAF84624;BAF84624.1;BC027728;BC052579;BC094777;BC104890;BC113430;BC143657;BE382927;BE515187;BG112933;BG499172;BG717336;BM544827;BM765278;BM794599;BM926567;BQ8…	Q504T9;Q8N2K1;Q96N26;Q96T84	UBE2J2	ubiquitin-conjugating enzyme E2, J2	ubiquitin-conjugating enzyme E2 J2; ubiquitin-conjugating enzyme E2, J2 (UBC6 homolog, yeast); OTTHUMP00000002077; non-canonical ubiquitin-conjugating enzyme 2; OTTHUMP00000220526; OTTHUMP00000220527; OTTHUMP00000001907; OTTHUMP00000002078; yeast UBC6 homolog; ubiquitin conjugating enzyme E2, J2; ubiquitin conjugating enzyme 6	Ubiquitin-conjugating enzyme E2 J2	0.2483	0.008126
283	A_72_P175186	UBE2Q	55585	AC_000044;AC_000133;NC_000001;NM_017582;NP_060052;NT_004487;NW_001838529;NW_925683	AAF71141;AAF71141.1;AAH00848;AAH00848.1;AAH15316;AAH15316.2;AAH61583;AAH61583.1;AAH70158;AAH70158.1;AAH87836;AAH87836.1;AAI07058;AAI07058.1;AAI48186;AAI72317;AAM60814;AAM60814.1;AAY23342;AC_000044;AC_000133;AF116721;AJ243666;AK056388;AK293986;AL592078;AY112698;AY948200;BAB71173;BAB71173.1;BAG57353;BAG57353.1;BC000848;BC009286;BC015316;BC061583;BC070158;BC087836;BC107057;BC148185;BC172317;BQ278712…	B4DF92;Q3B841;Q5I0X2;Q6IS04;Q6P7P2;Q7Z7E8;Q96MV4;Q9BVX5;Q9UGL6	UBE2Q1	ubiquitin-conjugating enzyme E2Q family member 1	ubiquitin carrier protein Q1; protein NICE-5; ubiquitin-conjugating enzyme E2 Q1; ubiquitin-conjugating enzyme E2Q (putative); OTTHUMP00000035378; ubiquitin-conjugating enzyme E2Q (putative) 1; galactosyl transferase-associated protein; ubiquitin-protein ligase Q1	Ubiquitin-conjugating enzyme E2 Q1	0.3445	3.32e-05
284	A_72_P296249;A_72_P240427	UBPY	9101	AC_000058;AC_000147;NC_000015;NM_001128610;NM_001128611;NM_005154;NP_001122082;NP_001122083;NP_005145;NT_010194;NW_001838218;NW_925884	AA399951;AA773713;AAH15545;AAH26954;AAH38801;AAH38801.1;AAH51345;AAH51345.1;AAI10591;AAI10591.1;AC012170;AC_000058;AC_000147;AK091775;AK292400;AK296480;AK300590;BAA06225;BAA06225.2;BAF85089;BAG52415;BAG59120;BAG62288;BC015545;BC026954;BC038801;BC051345;BC062694;BC092443;BC110590;BM751645;BX537420;CA312140;CAD97662;CAD97662.1;CH471082;D29956;EAW77399;EAW77400;EAW77401;EAW77402;NC_000015;NM_0011286…	P40818;Q2TB31;Q7Z3U2;Q86VA0;Q8IWI7	USP8	ubiquitin specific peptidase 8	ubiquitin isopeptidase Y; ubiquitin thioesterase 8; hUBPy; deubiquitinating enzyme 8; ubiquitin carboxyl-terminal hydrolase 8; ubiquitin specific protease 8; OTTHUMP00000162416; ubiquitin thiolesterase 8; ubiquitin-specific-processing protease 8	Ubiquitin carboxyl-terminal hydrolase 8	-0.341	0.009028
285	A_72_P030491	UBXD1	80700	AC_000062;AC_000151;NC_000019;NM_001171091;NM_025241;NP_001164562;NP_079517;NT_011255;NW_001838477;NW_927173	AAH07414;AAH07414.2;AAH08288;AAH08288.1;AAH17113;AAH17113.1;AAK13257;AAK13257.1;AAK13258;AAK13258.1;AC011498;AC_000062;AC_000151;AF272893;AF272894;AK090473;AL833695;BAC03454;BC007414;BC008288;BC017113;BM764980;CH471139;CR590857;CR598178;CR617368;EAW69219;EAW69219.1;EAW69220;EAW69221;EAW69222;EAW69222.1;EAW69223;NC_000019;NM_001171091;NM_025241;NP_001164562;NP_079517;NT_011255;NW_001838477;NW_9271…	D6W626;Q96AH1;Q96IK9;Q9BZV0;Q9BZV1	UBXN6	UBX domain protein 6	UBX domain-containing 1; UBX domain-containing protein 6; UBX domain-containing protein 1; UBX domain containing 1; UBX domain-containing 2	UBX domain-containing protein 6	0.3998	0.0001836
286	A_72_P412428	USP34	9736	AC_000045;AC_000134;NC_000002;NM_014709;NP_055524;NT_022184;NW_001838769;NW_927719	AAH22783;AAH22783.1;AAH62325;AAH62325.1;AAI07762;AAI07762.1;AB011142;AB018272;AC016727;AC016747;AC016894;AC018889;AC_000045;AC_000134;AJ586138;AK001193;AK022637;AK023171;AK023845;AK024341;AK124932;AK125898;AK126741;AL050092;AL050376;AL831918;AW293998;BAA25496;BAA25496.2;BAA34449;BAA34449.1;BAG54261;BAG54261.1;BC022783;BC062325;BC107761;BC141839;BX473680;CAB43264;CAB43264.1;CAD38579;CAD38579.1;CAE…	A8MWD0;B3KWU9;O60316;O94834;Q3B777;Q6P6C9;Q70CQ2;Q7L8P6;Q8N3T9;Q8TBW2;Q9UGA1	USP34	ubiquitin specific peptidase 34	ubiquitin-specific-processing protease 34; OTTHUMP00000201402; ubiquitin carboxyl-terminal hydrolase 34; deubiquitinating enzyme 34; ubiquitin thiolesterase 34; ubiquitin specific protease 34; ubiquitin thioesterase 34	Ubiquitin carboxyl-terminal hydrolase 34	-0.2644	0.008941
287	A_72_P151936	UTP6	55813	AC_000060;AC_000149;NC_000017;NM_018428;NP_060898;NT_010799;NW_001838430;NW_926772	AAF66244;AAF66244.1;AAF71054;AAH15454;AAH15454.1;AAH35325;AAH35325.1;AAO15382;AAO15382.1;AC004253;AC129917;AC_000060;AC_000149;AF116631;AF244135;AF334386;AJ272197;AK057202;AK126564;AK225448;AK299806;AK315929;BAG51883;BAG54344;BAG61681;BAH14300;BC015454;BC035325;CAB77268;CAB77268.1;CH471147;CR607732;CR625726;EAW80259;NC_000017;NM_018428;NP_060898;NT_010799;NW_001838430;NW_926772;Q9NYH9;Q9P1J8	Q8IX96;Q96BL2;Q9NQ91;Q9NYH9	UTP6	UTP6, small subunit (SSU) processome component, homolog (yeast)	multiple hat domains protein; U3 small nucleolar RNA-associated protein 6 homolog; hepatocellular carcinoma associated antigen 66; chromosome 17 open reading frame 40; OTTHUMP00000163709; hepatocellular carcinoma-associated antigen 66	U3 small nucleolar RNA-associated protein 6 homolog	-0.3253	0.002421
288	A_72_P166616	VPS41	27072	AC_000050;AC_000068;AC_000139;NC_000007;NM_014396;NM_080631;NP_055211;NP_542198;NT_007819;NT_079592;NW_001839003;NW_923240	AAB47563;AAB47563.1;AAB47758;AAB47758.1;AAC42004;AAC42004.1;AAH44851;AAH44851.1;AAQ96883;AAS00372;AAS00373;AC004850;AC005247;AC_000050;AC_000068;AC_000139;ADR82667;AK026848;AK074325;AK299143;AK314556;BAG37141;BAG61195;BC044851;BX648347;CH236951;CH471073;CR618313;EAW94113;EAW94114;HQ257912;L40398;NC_000007;NM_014396;NM_080631;NP_055211;NP_542198;NT_007819;NT_079592;NW_001839003;NW_923240;P49754;Q7…	P49754;Q86TP8;Q99851;Q99852	VPS41	vacuolar protein sorting 41 homolog (S. cerevisiae)	S53; OTTHUMP00000135323; vacuolar protein sorting-associated protein 41 homolog; vacuolar protein sorting 41 (yeast); vacuolar protein sorting 41 (yeast homolog); vacuolar assembly protein 41; OTTHUMP00000135322	Vacuolar protein sorting-associated protein 41 homolog	0.271	0.003113
289	A_72_P344233	WASH1	100287171	NC_000009;NM_182905;NP_878908;NT_008413;NW_001839391	A8K0Z3;AAI56860;AAI60141;AK024448;AK024481;AK289708;AK309568;AL928970;BAB15738;BAB15771;BAF82397;BAF82397.1;BC014406;BC063893;BC094860;BC156859;BC160141;BM970740;CN404407;CR612421;CR621334;CR621474;NC_000009;NM_182905;NP_878908;NT_008413;NW_001839391;Q9H7J9;Q9H7N0;Q9NSV7	A8K0Z3	WASH1	WAS protein family homolog 1	family with sequence similarity 39, member E; CXYorf1-like protein on chromosome 9; FLJ00075 protein	WAS protein family homolog 1	0.6185	0.001286
290	A_72_P344233	WASH3P	374666	AC_000144;NC_000015;NR_003659;NT_010274;NW_001838048	AC140725;AC_000144;AF282037;AK056232;AK057951;AK095183;AK097269;AK290087;AK291582;AK295256;AK300161;AW604905;BAF82776;BAF84271;BAG53001;BAG58245;BAG61944;BC048328;BC063555;BC067227;BC110991;BC110996;BI830790;BI830792;BM839085;BQ722707;BQ935819;BQ937971;BX452679;C4AMC7;CR595252;CR601154;CR602007;CR604794;CR605448;CR614102;CR614532;CR617972;CR620495;CR622124;CR622318;DA065132;NC_000015;NR_003659;NT…	C4AMC7	WASH3P	WAS protein family homolog 3 pseudogene	family with sequence similarity 39, member D pseudogene	Putative WAS protein family homolog 3	0.6185	0.001286
291	A_72_P359418	WDHD1	11169	AC_000057;AC_000146;NC_000014;NM_001008396;NM_007086;NP_001008397;NP_009017;NT_026437;NW_001838111;NW_925561	AAH00622;AAH00622.1;AAH05040;AAH43349;AAH43349.1;AAH63041;AAH63041.1;AAT44529;AC_000057;AC_000146;AJ006266;AK001538;AK001585;AK001620;AK293005;AL160471;AY517556;BAF85694;BAG50934;BAG50944;BAG50951;BC000622;BC005040;BC043349;BC063041;BQ420741;CAA06932;CAA06932.1;CB053003;CH471061;DA189308;DB082418;EAW80654;NC_000014;NM_001008396;NM_007086;NP_001008397;NP_009017;NT_026437;NW_001838111;NW_925561;O75…	O75717	WDHD1	WD repeat and HMG-box DNA binding protein 1	CTF4, chromosome transmission fidelity factor 4 homolog; WD repeat and HMG-box DNA-binding protein 1; OTTHUMP00000178995; Acidic nucleoplasmic DNA-binding protein 1	WD repeat and HMG-box DNA-binding protein 1	0.5001	0.005167
292	A_72_P158266	WDR33	55339	AC_000045;AC_000134;NC_000002;NM_001006622;NM_001006623;NM_018383;NP_001006623;NP_001006624;NP_060853;NT_022135;NW_001838849;NW_921507	AA142986;AAH05401;AAH05401.1;AAH13990;AAH13990.1;AAH68484;AAX82033;AAX82033.1;AB044749;AC006011;AC_000045;AC_000134;AI039494;AK002156;AK098003;AK123510;AK223319;AL043051;AL834365;BAA92113;BAA92113.1;BAB32435;BAB32435.1;BAD97039;BAD97039.1;BC005401;BC010283;BC013990;BC068484;BC108671;BC169262;BC169263;BC169264;BM673679;BQ896760;BU597855;CAH10688;CH471103;CR591938;DA768238;DB324904;EAW95342;EAW9534…	Q05DP8;Q53FG9;Q587J1;Q9C0J8;Q9NUL1	WDR33	WD repeat domain 33	WD repeat-containing protein 33; WD repeat-containing protein WDC146; OTTHUMP00000205989; OTTHUMP00000203870; OTTHUMP00000203871; OTTHUMP00000203869	WD repeat-containing protein 33	0.4203	0.008407
293	A_72_P098786	WDR5	11091	AC_000052;AC_000141;NC_000009;NM_017588;NM_052821;NP_060058;NP_438172;NT_035014;NW_001839242;NW_924573	AA490313;AAH01635;AAH01635.1;AC_000052;AC_000141;ADQ32719;AJ011376;AK000552;AK024484;AK025810;BAA91248;BAA91248.1;BAB15774;BC001635;BC015594;BC029769;BG773451;BX649632;CAB66159;CAB66159.1;CAI18774;CH471090;EAW88117;EAW88118;EAW88119;EAW88120;HQ448239;NC_000009;NM_017588;NM_052821;NP_060058;NP_438172;NT_035014;NW_001839242;NW_924573;P61964;Q9H7J6	P61964;Q91VA5;Q9NWX7;Q9UGP9	WDR5	WD repeat domain 5	WD repeat-containing protein 5; WD-repeat protein 5; OTTHUMP00000162494; SWD3, Set1c WD40 repeat protein, homolog; BMP2-induced 3-kb gene protein	WD repeat-containing protein 5	0.1459	0.008471
294	A_72_P391178	WDR71	80227	AC_000054;AC_000143;NC_000011;NM_025155;NP_079431;NT_167190;NW_001838028;NW_925106	AAH06142;AAH06142.2;AAH21541;AAH21541.1;AAH28628;AAH28628.1;AAP97194;AAP97194.1;AC_000054;AC_000143;ADQ32653;AF087895;AK021910;AK222501;AK225520;AK298258;AK309133;AK316394;AP002770;BAB13933;BAB13933.1;BAD96221;BAD96221.1;BAG60522;BAH14765;BC006142;BC021541;BC028628;BC028677;BC045774;CH471076;CR608221;CR621285;CR623159;EAW74917;EAW74917.1;EAW74918;EAW74919;HQ448172;NC_000011;NM_025155;NP_079431;NT…	A6NDR5;Q4G165;Q53HS9;Q7Z500;Q8TBU6;Q9BRP4;Q9HAB6	PAAF1	proteasomal ATPase-associated factor 1	WD repeat domain 71; OTTHUMP00000237779; OTTHUMP00000237788; OTTHUMP00000237785; OTTHUMP00000237778; OTTHUMP00000237784; OTTHUMP00000237782; WD repeat-containing protein 71	Proteasomal ATPase-associated factor 1	1.198	0.001287
295	A_72_P403468	XRN2	22803	AC_000063;AC_000152;NC_000020;NM_012255;NP_036387;NT_011387;NW_001838652;NW_927317	AAD55138;AAD55138.1;AAH06417;AAH06417.2;AAI31776;AAI60100;AAQ13577;AAQ13577.1;AAR24369;AAR24369.1;AC_000063;AC_000152;AF064257;AF152169;AK000084;AK001573;AK172858;AK302846;AK303312;AK314602;AL117332;AL136841;AL158013;AY382900;BAA90934;BAA90934.1;BAG50941;BAG64035;BAG64381;BC000315;BC006417;BC032075;BC131775;BC142960;BC160100;BF665945;BU620774;CAB66775;CAB66775.1;CAH71495;CAH71495.1;CAI19756;CAI19…	Q3L8N4;Q6KGZ9;Q9BQL1;Q9H0D6;Q9NTW0;Q9NXS6;Q9UL53	XRN2	5'-3' exoribonuclease 2	DHP protein; OTTHUMP00000030403; Dhm1-like protein (mouse homolog)	5'-3' exoribonuclease 2	-0.4315	0.005714
296	A_72_P256002	YAP (HCCA2)	55249	AC_000044;AC_000133;NC_000001;NM_001198899;NM_001198900;NM_001198901;NM_001198902;NM_001198903;NM_001198904;NM_001198905;NM_001198906;NM_018253;NM_139118;NM_139119;NM_139121;NP_001185828;NP_001185829;NP_001185830;NP_001185831;NP_001185832;NP_001185833;NP_001185834;NP_001185835;NP_060723;NP_620829;NP_620830;NP_620832;NT_004487;NW_001838531;NW_925683	AAH01655;AAH01655.2;AAH01843;AAH01843.2;AAH08766;AAH08766.2;AAH09358;AAH09358.2;AAH14906;AAH14906.1;AAH44887;AAL74055;AAL74055.1;AAL75971;AAL75971.1;AAO13249;AAO13249.1;AAT34990;AAT34990.1;AC_000044;AC_000133;AF203474;AF206328;AF466401;AK001737;AK023976;AK125590;AK225883;AK297562;AK298904;AK303046;AK303386;AK303944;AK309701;AK315049;AL162734;AM393344;AM393852;AY604179;BAA91871;BAA91871.1;BAB14748…	B0QZ54;B4E0I0;D3DV96;D3DV98;Q5VYZ4;Q5VYZ7;Q7L4C3;Q7L5E2;Q8IXA6;Q8TEW5;Q8TF04;Q96HB6;Q9BQ64;Q9H869;Q9NV84	YY1AP1	YY1 associated protein 1	YY1-associated protein 1; OTTHUMP00000200836; OTTHUMP00000200832; OTTHUMP00000033476; OTTHUMP00000200831; OTTHUMP00000200833; hepatocellular carcinoma susceptibility protein; OTTHUMP00000033474; OTTHUMP00000200837; OTTHUMP00000033478; OTTHUMP00000033473; OTTHUMP00000033475; hepatocellular carcinoma-associated protein 2; OTTHUMP00000033477; OTTHUMP00000033479	YY1-associated protein 1	0.68	0.006259
297	A_72_P144396	YDJC	150223	AC_000065;AC_000154;NC_000022;NM_001017964;NP_001017964;NT_011520;NW_001838745;NW_927628	A8MPS7;AAI10076;AAI10076.1;AAI33044;AAI33044.1;AAI33048;AAI33048.1;AC_000065;AC_000154;AP000553;BC017281;BC053663;BC057814;BC064568;BC096754;BC110075;BC110799;BC133043;BC133047;BI597711;BQ050386;CH471095;CR590781;CR594858;CR596616;CR597037;CR600451;CR611449;CR613078;CR613432;CR614195;CR618402;CR620409;CR624561;EAW59461;EAW59461.1;EAW59462;EAW59463;EAW59463.1;EAW59464;NC_000022;NM_001017964;NP_001…	A8MPS7;Q2YDT4;Q4V9R7	YDJC	YdjC homolog (bacterial)	OTTHUMP00000198563; YdjC homolog	UPF0249 protein ydjC homolog	0.3574	0.003813
298	A_72_P378768	YLPM1	56252	AC_000057;AC_000146;NC_000014;NM_019589;NP_062535;NT_026437;NW_001838113;NW_925561	AAC42006;AAC42006.1;AAC42008;AAC42008.1;AAF61275;AAF61275.1;AAH07792;AAH07792.1;AAH23570;AAH44636;AAI72585;AC006530;AC007956;AC_000057;AC_000146;AK090435;AK095760;AK297582;AL832365;BAC03416;BAG59971;BC007792;BC023570;BC044636;BC172585;BX102033;DB096717;L40396;L40400;L40403;NC_000014;NM_019589;NP_062535;NT_026437;NW_001838113;NW_925561;P49750;Q6PJ41;Q86YA8;Q8NF45	P49750;P49752;Q96I64;Q9P1V7	YLPM1	YLP motif containing 1	nuclear protein ZAP3; YLP motif-containing protein 1; chromosome 14 open reading frame 170	YLP motif-containing protein 1	0.6758	0.003138
299	A_72_P073036	ZNF322A	79692	AC_000049;AC_000138;NC_000006;NM_001242797;NM_001242798;NM_001242799;NM_024639;NP_001229726;NP_001229727;NP_001229728;NP_078915;NT_007592;NW_001838974;NW_922984	AAH50425;AAH50425.2;AAH74772;AAH74772.1;AAI19670;AAI19670.1;AAQ85127;AAQ85127.1;ABZ92058;AC_000049;AC_000138;AK027046;AK290038;AL513548;AY376736;BAB15637;BAB15637.1;BAF82727;BAF82727.1;BC050425;BC074772;BC119669;BC139750;BX474628;CAJ42818;CH471087;CS185637;EAW55594;EAW55595;EAW55596;EU446529;NC_000006;NM_001242797;NM_001242798;NM_001242799;NM_024639;NP_001229726;NP_001229727;NP_001229728;NP_07891…	A8K1X3;Q0VDH6;Q6B0G2;Q6U7Q0;Q86W72;Q9H5I9	ZNF322A	zinc finger protein 322A	zinc finger protein 388; OTTHUMP00000215823; OTTHUMP00000215824; HLA complex group 12; zinc finger protein 489	Zinc finger protein 322A	-0.5093	0.009065
300	A_72_P073036	ZNF322B	387328	AC_000052;AC_000141;NC_000009;NM_199005;NP_945356;NT_008470;NW_001839236;NW_924539	AC_000052;AC_000141;AL590705;BC058829;BC070371;BC107578;CAI14725;CAI14725.2;NC_000009;NM_199005;NP_945356;NT_008470;NW_001839236;NW_924539;Q5SYY0	Q5SYY0	ZNF322B	zinc finger protein 322B	OTTHUMP00000021740; zinc finger protein 322	Zinc finger protein 322B	-0.5093	0.009065
301	A_72_P386503	ZNF37A	7587	AC_000053;AC_000142;NC_000010;NM_001007094;NM_001178101;NM_003421;NP_001007095;NP_001171572;NP_003412;NT_008705;NW_001837932;NW_924584	AA742606;AAH15858;AAH15858.1;ACE86674;ACE87359;AC_000053;AC_000142;ADZ15438;AJ492195;AK092012;AK130521;AL117339;AL708537;BAG52465;BAG52465.1;BC015858;BX647089;CAA36578;CAA36578.1;CAA48868;CAA48868.1;CAD37331;CAD37331.1;CAI14947;CAI14947.1;CH471072;CR613175;EAW85884;EAW85885;EAW85885.1;EAW85886;EAW85886.1;EAW85887;EU831918;EU832012;JF432221;NC_000010;NM_001007094;NM_001178101;NM_003421;NP_00100709…	B3KRQ3;D3DRZ3;P17032;Q96B88	ZNF37A	zinc finger protein 37A	OTTHUMP00000019467; zinc finger protein 37a (KOX 21); zinc finger protein KOX21	Zinc finger protein 37A	-0.4597	0.0001201
302	A_72_P279729	ZNF642	339559	AC_000044;AC_000133;NC_000001;NM_198494;NP_940896;NT_032977;NW_001838577;NW_921351	AAH41873;AAH41873.1;AC_000044;AC_000133;AK122618;AL603839;BAC85492;BAC85492.1;BC041873;BC078148;BC144174;BM677727;CAI16297;CAI16297.1;CH471059;CV374692;CX871163;DA687888;EAX07215;NC_000001;NM_198494;NP_940896;NT_032977;NW_001838577;NW_921351;Q49AA0	Q49AA0;Q5SWM5;Q6ZWK8	ZNF642	zinc finger protein 642	OTTHUMP00000008382; OTTHUMP00000008381	Zinc finger protein 642	1.058	0.0004482
303	A_72_P318799	c-FLIP (L)	8837	AC_000045;AC_000134;NC_000002;NG_029005;NM_001127183;NM_001127184;NM_001202515;NM_001202516;NM_001202517;NM_001202518;NM_001202519;NM_003879;NP_001120655;NP_001120656;NP_001189444;NP_001189445;NP_001189446;NP_001189447;NP_001189448;NP_003870;NT_005403;NW_001838863;NW_921618	AAB64110;AAB64110.1;AAB70909;AAB70909.1;AAB70910;AAB70910.1;AAB70911;AAB70911.1;AAB70912;AAB70912.1;AAB82648;AAB82648.1;AAB99790;AAB99790.1;AAB99791;AAB99791.1;AAB99792;AAB99792.1;AAB99793;AAB99793.1;AAB99794;AAB99794.1;AAC15825;AAC15825.1;AAC15826;AAC15826.1;AAC16439;AAC16439.1;AAC16440;AAC16440.1;AAC16441;AAC16441.1;AAC51622;AAC51622.1;AAC51623;AAC51623.1;AAH01602;AAH01602.1;AAP35397;AAP35397.1…	B7Z9F9;O14673;O14674;O14675;O15137;O15138;O15356;O15510;O15519;O43618;O43619;O43620;O60458;O60459;Q53TS6;Q54AF1;Q96TE4;Q9UEW1	CFLAR	CASP8 and FADD-like apoptosis regulator	caspase-related inducer of apoptosis; inhibitor of FLICE; FADD-like anti-apoptotic molecule; cellular FLICE-like inhibitory protein; caspase homolog; caspase-like apoptosis regulatory protein; usurpin beta; MACH-related inducer of toxicity; caspase-eight-related protein; OTTHUMP00000163715; FADD-like antiapoptotic molecule 1; OTTHUMP00000207360; OTTHUMP00000206475; OTTHUMP00000206479; OTTHUMP0000…	CASP8 and FADD-like apoptosis regulator	0.4123	0.00538
304	A_72_P318799	c-FLIP (S)	8837	AC_000045;AC_000134;NC_000002;NG_029005;NM_001127183;NM_001127184;NM_001202515;NM_001202516;NM_001202517;NM_001202518;NM_001202519;NM_003879;NP_001120655;NP_001120656;NP_001189444;NP_001189445;NP_001189446;NP_001189447;NP_001189448;NP_003870;NT_005403;NW_001838863;NW_921618	AAB64110;AAB64110.1;AAB70909;AAB70909.1;AAB70910;AAB70910.1;AAB70911;AAB70911.1;AAB70912;AAB70912.1;AAB82648;AAB82648.1;AAB99790;AAB99790.1;AAB99791;AAB99791.1;AAB99792;AAB99792.1;AAB99793;AAB99793.1;AAB99794;AAB99794.1;AAC15825;AAC15825.1;AAC15826;AAC15826.1;AAC16439;AAC16439.1;AAC16440;AAC16440.1;AAC16441;AAC16441.1;AAC51622;AAC51622.1;AAC51623;AAC51623.1;AAH01602;AAH01602.1;AAP35397;AAP35397.1…	B7Z9F9;O14673;O14674;O14675;O15137;O15138;O15356;O15510;O15519;O43618;O43619;O43620;O60458;O60459;Q53TS6;Q54AF1;Q96TE4;Q9UEW1	CFLAR	CASP8 and FADD-like apoptosis regulator	caspase-related inducer of apoptosis; inhibitor of FLICE; FADD-like anti-apoptotic molecule; cellular FLICE-like inhibitory protein; caspase homolog; caspase-like apoptosis regulatory protein; usurpin beta; MACH-related inducer of toxicity; caspase-eight-related protein; OTTHUMP00000163715; FADD-like antiapoptotic molecule 1; OTTHUMP00000207360; OTTHUMP00000206475; OTTHUMP00000206479; OTTHUMP0000…	CASP8 and FADD-like apoptosis regulator	0.4123	0.00538
305	A_72_P352758	gamma-Secretase complex	23385	AC_000044;AC_000133;NC_000001;NG_027935;NM_015331;NP_056146;NT_004487;NW_001838531;NW_925683	AAG11412;AAG11412.1;AAH47621;AAH47621.1;AAQ89478;AAQ89478.1;AC_000044;AC_000133;ADZ15586;AF240468;AK296153;AK299142;AK310741;AK314764;AL445230;AY359120;BAA13383;BAA13383.1;BAG37302;BAG58892;BAG61194;BC047621;BC100024;CAI15006;CAI15007;CAI15008;CAI15009;CAI15010;CAI15010.1;CAI15011;CAI15012;CAI15013;CH471121;CN429672;CR596089;CR605263;D87442;EAW52720;EAW52721;EAW52722;EAW52722.1;JF432369;NC_000001…	Q5T207;Q86VV5;Q92542	NCSTN	nicastrin	anterior pharynx-defective 2; OTTHUMP00000031840; ATAG1874; OTTHUMP00000031839		0.2601	0.005156
306	A_72_P084566	iPLA2	50640	AC_000050;AC_000068;AC_000139;NC_000007;NM_015723;NP_056538;NT_007933;NT_079596;NW_001839071;NW_923640	AAD08847;AAD08847.1;AAF67630;AAF67630.1;AAF75269;AAF75269.1;AAF81246;AAF81246.1;AAH32999;AAH32999.1;AB041261;ABM81874;ABM85037;AC005058;AC_000050;AC_000068;AC_000139;AF217519;AF263613;AF263947;AK002115;AK024335;AK291755;AL834147;AM392663;BAA92090;BAA92090.1;BAA94997;BAA94997.1;BAB14890;BAB14890.1;BAF84444;BC005203;BC032999;BX647865;CAD38859;CAD38859.1;CAL37541;CH236947;CH471070;CR620052;DQ890948;…	A4D0S1;O95035;Q8N3I3;Q9H7T5;Q9NP80;Q9NR17;Q9NUN2;Q9NZ79	PNPLA8	patatin-like phospholipase domain containing 8	membrane-associated calcium-independent phospholipase A2 gamma; calcium-independent phospholipase A2-gamma; PNPLA-gamma; OTTHUMP00000206862; OTTHUMP00000206858; iPLA2-gamma; iPLA2 gamma; OTTHUMP00000206861; OTTHUMP00000206860; patatin-like phospholipase domain-containing protein 8; OTTHUMP00000206859; intracellular membrane-associated calcium-independent phospholipase A2 gamma; OTTHUMP00000206842		-0.597	0.001964
307	A_72_P392404	jBid	637	AC_000065;AC_000154;NC_000022;NM_001196;NM_197966;NM_197967;NP_001187;NP_932070;NP_932071;NT_011519;NW_001838735;NW_927406	AAC34365;AAC34365.1;AAF89091;AAF89091.1;AAH09197;AAH09197.1;AAH22072;AAH22072.2;AAH33634;AAH33634.1;AAH36364;AAH36364.2;AAO32633;AAO32633.1;AAP50259;AAP50259.1;AAP97190;AAP97190.1;AAQ15216;ABZ92041;AC006285;AC016026;ACA61804;ACD47106;ACD47107;ACD47108;AC_000065;AC_000154;AF042083;AF087891;AF250233;AF370380;AK094795;AK313729;AY005151;AY309922;BAF79673;BAG36471;BAG52933;BC009197;BC022072;BC033634;B…	P55957;Q549M7;Q71T04;Q7Z4M9;Q8IY86	BID	BH3 interacting domain death agonist	BID isoform Si6; BID isoform L(2); BH3-interacting domain death agonist; p22 BID; Human BID coding sequence; OTTHUMP00000196194; OTTHUMP00000196195; apoptic death agonist; desmocollin type 4; BID isoform ES(1b); OTTHUMP00000196197	jBid	0.5038	0.0006675
308	A_72_P392404	tBid	637	AC_000065;AC_000154;NC_000022;NM_001196;NM_197966;NM_197967;NP_001187;NP_932070;NP_932071;NT_011519;NW_001838735;NW_927406	AAC34365;AAC34365.1;AAF89091;AAF89091.1;AAH09197;AAH09197.1;AAH22072;AAH22072.2;AAH33634;AAH33634.1;AAH36364;AAH36364.2;AAO32633;AAO32633.1;AAP50259;AAP50259.1;AAP97190;AAP97190.1;AAQ15216;ABZ92041;AC006285;AC016026;ACA61804;ACD47106;ACD47107;ACD47108;AC_000065;AC_000154;AF042083;AF087891;AF250233;AF370380;AK094795;AK313729;AY005151;AY309922;BAF79673;BAG36471;BAG52933;BC009197;BC022072;BC033634;B…	P55957;Q549M7;Q71T04;Q7Z4M9;Q8IY86	BID	BH3 interacting domain death agonist	BID isoform Si6; BID isoform L(2); BH3-interacting domain death agonist; p22 BID; Human BID coding sequence; OTTHUMP00000196194; OTTHUMP00000196195; apoptic death agonist; desmocollin type 4; BID isoform ES(1b); OTTHUMP00000196197	tBid	0.5038	0.0006675
309	A_72_P344233		374677	NC_000016;NG_003159;NT_010393	NC_000016;NG_003159;NT_010393;Z84812	A8MWX3	WASH4P	WAS protein family homolog 4 pseudogene	family with sequence similarity 39, member C pseudogene		0.6185	0.001286
310	A_72_P344233		375690	AC_000066;AC_000155;NC_000019;NR_033266;NT_011255;NW_001842421;NW_927733	AC008993;AC_000066;AC_000155;AK308635;NC_000019;NR_033266;NT_011255;NW_001842421;NW_927733	No ID	WASH5P	WAS protein family homolog 5 pseudogene			0.6185	0.001286
311	A_72_P135431		2651	AC_000049;AC_000138;NC_000006;NG_007469;NM_001491;NM_145649;NM_145655;NP_001482;NP_663624;NP_663630;NT_007592;NW_001838973;NW_922984	AAA81777;AAA81777.1;AAA99832;AAA99832.1;AAH74801;AAH74801.1;AAH74802;AAH74802.1;AAI30525;AAI30525.1;AAL50561;AAL50562;AAM73864;AAM73864.1;AAM73865;AAM73865.1;AAM73866;AAM73866.1;AAM73867;AAM73869;AAM73870;AAM74524;AAR95646;AAR95646.1;AAR95647;AAR95647.1;AAR95648;AAR95648.1;AB078432;AB078433;AC_000049;AC_000138;ADR82994;AF401652;AF401653;AF458024;AF458025;AF458026;AF458027;AF458028;AF458029;AF4580…	Q06430;Q5T4J1;Q5W0E9;Q6T5E5;Q8N0V5;Q8NFS9	GCNT2	glucosaminyl (N-acetyl) transferase 2, I-branching enzyme (I blood group)	N-acetyllactosaminide beta-1,6-N-acetylglucosaminyl-transferase; N-acetylglucosaminyltransferase; Ii blood group; glucosaminyl (N-acetyl) transferase 2, I-branching enzyme (Ii blood group); cataract, congenital; glucosaminyl (N-acetyl) transferase 5; glucosaminyl (N-acetyl) transferase 2, I-branching enzyme; N-acetyllactosaminide beta-1,6-N-acetylglucosaminyltransferase; OTTHUMP00000016018; OTTHU…		-0.351	0.001731
312	A_72_P236172		140290	AC_000064;AC_000153;NC_000021;NM_144659;NP_653260;NT_011512;NW_001838706;NW_927384	AAH27970;AAH27970.1;AAH33855;AAH33855.1;AAM18531;AAM18531.1;AC_000064;AC_000153;ADQ31627;AF115967;AK001794;AK058078;AK223529;AP000274;AP000275;AP001714;BAA91915;BAA91915.1;BAB71653;BAB71653.1;BAD97249;BAD97249.1;BC022024;BC027970;BC033855;BG717680;BG721020;BI829783;BX111775;CB243926;CH471079;EAX09869;HQ447140;NC_000021;NM_144659;NP_653260;NT_011512;NW_001838706;NW_927384;Q8TDR4	Q53EW0;Q8N366;Q8TDR4;Q96LN5;Q9NV44	TCP10L	t-complex 10 (mouse)-like	T-complex 10A-2; T-complex protein 10A-2; T-complex protein 10A homolog 2; TCP10-like; t-complex 10 (a murine tcp homolog)-like; OTTHUMP00000067368		0.4726	0.001227
313	A_72_P241582		646359	AC_000150;NC_000018;NG_023014;NT_010859;NW_001838464	AC_000150;AP005212;NC_000018;NG_023014;NT_010859;NW_001838464	No ID	TERF1P2	telomeric repeat binding factor (NIMA-interacting) 1 pseudogene 2			-0.4134	0.009813
