# Supplementary material for: Investigations on Transgenerational Epigenetic Response Down the Male Line in F2 Pigs
Source: PLoS One. 2012 Feb 16;7(2):e30583. doi: 10.1371/journal.pone.0030583 (PMC3281031; doi:10.1371/journal.pone.0030583)
Supplement: Table S2 — Dataset of liver mapped to human orthologous genes (XLS). (XLSX) [file pone.0030583.s005.xlsx]

## Sheet: Sheet1
Liver
List Report
GeneGo Data										analysis_liver_filtered
#	Input IDs	Network Object Name	RefSeq IDs	GenBank IDs	SwissProt IDs	Gene Symbol	Gene Name	Gene Synonyms	Description	Signal	p-value
1	A_72_P221452	ABCG5/ABCG8 heterodimer	AC_000045;AC_000134;NC_000002;NG_008883;NG_008884;NM_022437;NP_071882;NT_022184;NW_001838769;NW_927719	AAG40004;AAG40004.1;AAI13658;AAI43565;AAK84078;AAK84078.1;AAK84663;AAK84663.1;AAK85386;AAK85389;AAY24011;AAY24011.1;AC108476;AC_000045;AC_000134;ADR83246;AF320294;AF324494;AF351812;AF351813;AF351814;AF351815;AF351816;AF351817;AF351818;AF351819;AF351820;AF351821;AF351822;AF351823;AF351824;AF404106;AF404107;BC113657;BC143564;CH471053;EAX00285;HQ258492;NC_000002;NG_008883;NG_008884;NM_022437;NP_0718…	Q53QN8;Q9H221	ABCG8	ATP-binding cassette, sub-family G (WHITE), member 8	sterolin-2; sterolin 2; ATP-binding cassette, sub-family G (WHITE), member 8 (sterolin 2); ATP-binding cassette, subfamily G, member 8; OTTHUMP00000158952; ATP-binding cassette sub-family G member 8		-0.5698	0.009849
2	A_72_P221452	ABCG8	AC_000045;AC_000134;NC_000002;NG_008883;NG_008884;NM_022437;NP_071882;NT_022184;NW_001838769;NW_927719	AAG40004;AAG40004.1;AAI13658;AAI43565;AAK84078;AAK84078.1;AAK84663;AAK84663.1;AAK85386;AAK85389;AAY24011;AAY24011.1;AC108476;AC_000045;AC_000134;ADR83246;AF320294;AF324494;AF351812;AF351813;AF351814;AF351815;AF351816;AF351817;AF351818;AF351819;AF351820;AF351821;AF351822;AF351823;AF351824;AF404106;AF404107;BC113657;BC143564;CH471053;EAX00285;HQ258492;NC_000002;NG_008883;NG_008884;NM_022437;NP_0718…	Q53QN8;Q9H221	ABCG8	ATP-binding cassette, sub-family G (WHITE), member 8	sterolin-2; sterolin 2; ATP-binding cassette, sub-family G (WHITE), member 8 (sterolin 2); ATP-binding cassette, subfamily G, member 8; OTTHUMP00000158952; ATP-binding cassette sub-family G member 8	ATP-binding cassette sub-family G member 8	-0.5698	0.009849
3	A_72_P377293	ABCR	AC_000044;AC_000133;NC_000001;NG_009073;NM_000350;NP_000341;NT_032977;NW_001838589;NW_921795	AAC05632;AAC05632.1;AAC23915;AAC23915.1;AAC51144;AAC51144.1;AAI72262;AAI72565;AAP33155;AB210040;ABD90529;AC093579;AC105278;AC_000044;AC_000133;AF000148;AF001945;AF533020;AK295818;AK296896;AK301733;AK301764;AK310492;AL712362;BAE06122;BAE06122.1;BAG58635;BAG63198;BAG63224;BAH12450;BC172262;BC172565;BM686882;CAA75729;CAA75729.1;CAH10486;CH471097;CR627391;DQ426859;EAW73056;EAW73057;EAW73058;NC_000001…	O15112;O60438;O60915;P78363;Q4LE31	ABCA4	ATP-binding cassette, sub-family A (ABC1), member 4	ATP binding cassette transporter; RIM protein; OTTHUMP00000012366; stargardt disease protein; ATP-binding cassette sub-family A member 4; photoreceptor rim protein; retinal-specific ATP-binding cassette transporter; ATP-binding transporter, retina-specific; RIM ABC transporter; ATP-binding cassette transporter, retinal-specific; retina-specific ABC transporter	Retinal-specific ATP-binding cassette transporter	-0.4997	0.006039
4	A_72_P237312	ADAM9	AC_000051;AC_000140;NC_000008;NG_016335;NM_003816;NP_003807;NR_027638;NR_027639;NR_027878;NT_167187;NW_001839129;NW_923907	A0AVL1;AAC50403;AAC50403.1;AAI26407;AAI43924;AAI43924.1;AAM49575;AAM49575.1;AC105091;AC108863;AC_000051;AC_000140;AF495383;AK293257;AV708278;BAA03499;BAA03499.2;BAG56789;BC027996;BC126406;BC143923;BC143924;CH471080;CR591969;CR601711;D14665;EAW63283;EAW63284;EAW63284.1;EAW63285;NC_000008;NG_016335;NM_003816;NP_003807;NR_027638;NR_027639;NR_027878;NT_167187;NW_001839129;NW_923907;Q13443;U41766	B7ZLN7;Q10718;Q13443;Q8NFM6	ADAM9	ADAM metallopeptidase domain 9	OTTHUMP00000216484; metalloprotease/disintegrin/cysteine-rich protein 9; ADAM metallopeptidase domain 9 (meltrin gamma); myeloma cell metalloproteinase; OTTHUMP00000216485; a disintegrin and metalloproteinase domain 9 (meltrin gamma); cone rod dystrophy 9; OTTHUMP00000216481; disintegrin and metalloproteinase domain-containing protein 9; cellular disintegrin-related protein; OTTHUMP00000216486	Disintegrin and metalloproteinase domain-containing protein 9	0.6211	0.002575
5	A_72_P098751	ALOX12	AC_000060;AC_000149;NC_000017;NM_000697;NP_000688;NT_010718;NW_001838403;NW_926584	AAA51533;AAA51533.1;AAA51587;AAA51587.1;AAA59523;AAA59523.1;AAA60056;AAA60056.1;AAD14020;AAD14020.1;AAD14021;AAD32700;AAD32700.1;AAH69557;AAH69557.1;AAS00094;AAS00094.1;AC040977;AC_000060;AC_000149;AF143883;AY527817;BAA02162;BAA02162.1;BC069557;CH471108;D12638;EAW90281;M35418;M58704;M62982;M87004;NC_000017;NM_000697;NP_000688;NT_010718;NW_001838403;NW_926584;P18054;Q16120;S68587;S68588	O95569;P18054;Q6ISF8;Q9UQM4	ALOX12	arachidonate 12-lipoxygenase	OTTHUMP00000128281; platelet-type lipoxygenase 12; arachidonate 12-lipoxygenase, 12S-type; platelet 12-LOX; 12(S)-lipoxygenase; platelet-type 12-lipoxygenase; 12S-lipoxygenase	Arachidonate 12-lipoxygenase, 12S-type	-2.008	0.00128
6	A_72_P223767	APOE	AC_000062;AC_000151;NC_000019;NG_007084;NM_000041;NP_000032;NT_011109;NW_001838496;NW_927217	AAB59397;AAB59397.1;AAB59518;AAB59518.1;AAB59546;AAB59546.1;AAD02505;AAD02505.1;AAG27089;AAG27089.1;AAH03557;AAH03557.1;AAL82810;AB035149;ABM83474;ABM86685;AC011481;ACN81314;ACN81314.1;AC_000062;AC_000151;AF050154;AF261279;AK314898;AY077451;BAA96080;BAA96080.1;BAG37412;BAG37412.1;BC003557;BU848796;CAA25017;CAA63051;CAA94806;CH471126;DQ892548;DQ895759;EAW57306;FJ525876;K00396;M10065;M12529;NC_0000…	B2RC15;C0JYY5;P02649;Q9P2S4	APOE	apolipoprotein E	apo-E; OTTHUMP00000197075; OTTHUMP00000159143; OTTHUMP00000197077; Alzheimer disease 2 (APOE*E4-associated, late onset); OTTHUMP00000197076; apolipoprotein E3	Apolipoprotein E	-0.4211	0.002225
7	A_72_P058681	ARMC1	AC_000051;AC_000140;NC_000008;NM_018120;NP_060590;NT_008183;NW_001839132;NW_923929	AAH11607;AAH11607.1;AC055822;AC100814;AC_000051;AC_000140;ADQ31864;AK001373;AK024053;AK304463;AL512767;BAA91656;BAA91656.1;BAB14803;BAB14803.1;BAG65279;BC011607;BC018846;CAC21684;CAC21684.1;CH471068;CR625619;EAW86880;HQ447378;NC_000008;NM_018120;NP_060590;NT_008183;NW_001839132;NW_923929;Q9NVT9	Q9H018;Q9H820;Q9NVT9	ARMC1	armadillo repeat containing 1	OTTHUMP00000226552; armadillo repeat-containing protein 1	Armadillo repeat-containing protein 1	0.7236	0.00255
8	A_72_P093246	ASM3B	AC_000044;AC_000133;NC_000001;NM_001009568;NM_014474;NP_001009568;NP_055289;NT_004610;NW_001838576;NW_921351	AAH14444;AAH14444.1;AC_000044;AC_000133;AK293489;AK293566;AK301349;AK316500;AL512288;BAG56976;BAG57037;BAG62896;BAH14871;BAH14871.1;BC014444;BQ011468;BX389470;CAA69328;CAA69328.1;CAI14293;CAI14293.1;CAI14294;CAI14294.1;CAI14295;CB160850;CH471059;CR613549;EAX07721;EAX07721.1;EAX07722;EAX07723;NC_000001;NM_001009568;NM_014474;NP_001009568;NP_055289;NT_004610;NW_001838576;NW_921351;Q92485;Y08134	B7ZB35;Q5T0Z0;Q92485;Q96CB7	SMPDL3B	sphingomyelin phosphodiesterase, acid-like 3B	OTTHUMP00000004006; acid sphingomyelinase-like phosphodiesterase 3b; ASM-like phosphodiesterase 3b; OTTHUMP00000004004; OTTHUMP00000004005	Acid sphingomyelinase-like phosphodiesterase 3b	-0.5145	0.002578
9	A_72_P077776	Aquaporin 9	AC_000058;AC_000147;NC_000015;NG_011975;NM_020980;NP_066190;NT_010194;NW_001838218;NW_925884	AAF16677;AAF16677.1;AAF27983;AAF27983.1;AAH26258;AAH26258.1;AB008775;AC025431;AC066616;AC_000058;AC_000147;AF016495;AF102870;AK300055;AK313214;BAA24864;BAA24864.1;BAG36029;BAG61864;BC026258;BE042553;CAG46824;CB528930;CBJ05770;CBJ21222;CH471082;CR542027;DC410284;EAW77532;EAW77533;EAW77534;HC250945;HC311134;NC_000015;NG_011975;NM_020980;NP_066190;NT_010194;NW_001838218;NW_925884;O43315;Q6FGT0	O43315;Q9NP32	AQP9	aquaporin 9	aquaglyceroporin-9; aquaporin-9; small solute channel 1; OTTHUMP00000163469	Aquaporin-9	-0.6597	0.005737
10	A_72_P077886	BDNF	AC_000054;AC_000143;NC_000011;NG_011794;NM_001143805;NM_001143806;NM_001143807;NM_001143808;NM_001143809;NM_001143810;NM_001143811;NM_001143812;NM_001143813;NM_001143814;NM_001143816;NM_001709;NM_170731;NM_170732;NM_170733;NM_170734;NM_170735;NP_001137277;NP_001137278;NP_001137279;NP_001137280;NP_001137281;NP_001137282;NP_001137283;NP_001137284;NP_001137285;NP_001137286;NP_001137288;NP_001700;NP_…	AAA51820;AAA51820.1;AAA69805;AAA69805.2;AAA96140;AAA96140.1;AAG47514;AAG47514.1;AAH29795;AAH29795.1;AAK92487;AAK92487.1;AAL23557;AAL23557.2;AAL23558;AAL23558.1;AAL23559;AAL23559.1;AAL23560;AAL23560.1;AAL23561;AAL23561.1;AAL23562;AAL23562.1;AAL23563;AAL23563.1;AAL23564;AAL23564.1;AAL23565;AAL23565.2;AAL23571;AAO15434;AAO15434.1;AAR14686;AAT74399;AAT74399.1;AB038670;AB038671;AB038672;AB038673;AB038…	A7LA85;A7LA92;D3DQZ2;P23560;Q598Q1;Q6DN19;Q6YNR2;Q6YNR3;Q9BYY7;Q9UC24	BDNF	brain-derived neurotrophic factor	OTTHUMP00000232016; abrineurin; OTTHUMP00000232040; OTTHUMP00000232014; neurotrophin; OTTHUMP00000232020; OTTHUMP00000232015; OTTHUMP00000232013; OTTHUMP00000232005; OTTHUMP00000232018; OTTHUMP00000232039; OTTHUMP00000232041; OTTHUMP00000232019; OTTHUMP00000232043; OTTHUMP00000232006; OTTHUMP00000232021; OTTHUMP00000232022	Brain-derived neurotrophic factor	-0.4794	0.0007715
11	A_72_P209407	C1 inhibitor	AC_000054;AC_000143;NC_000011;NG_009625;NM_000062;NM_001032295;NP_000053;NP_001027466;NT_167190;NW_001838023;NW_925106	AAA35613;AAA35613.1;AAA51848;AAA51848.1;AAA51849;AAA51849.1;AAA53096;AAA53096.1;AAB33044;AAB33044.2;AAB59387;AAB59387.1;AAH11171;AAH11171.1;AAM21515;AAM21515.1;AAP35612;AAP35612.1;AAQ19269.1;AAV33124;AAV33125;AAW69393;AAW69393.1;AB209826;ABM82725;ABM85908;AC_000054;AC_000143;ADU87625;AF435921;AK293054;AK303809;AK303840;AK312626;AL703442;AP000662;AP002893;AY291075;AY732485;AY732486;AY904027;BAD930…	A6NMU0;A8KAI9;B2R6L5;P05155;Q16304;Q547W3;Q59EI5;Q7Z455;Q96FE0;Q9UC49;Q9UCF9	SERPING1	serpin peptidase inhibitor, clade G (C1 inhibitor), member 1	C1 esterase inhibitor; C1-inhibiting factor; serpin G1; OTTHUMP00000197007; OTTHUMP00000197004; serine (or cysteine) proteinase inhibitor, clade G (C1 inhibitor), member 1, (angioedema, hereditary); plasma protease C1 inhibitor; OTTHUMP00000235287; OTTHUMP00000197003; serine/cysteine proteinase inhibitor clade G member 1; complement component 1 inhibitor; OTTHUMP00000235286	Plasma protease C1 inhibitor	-0.6014	0.006676
12	A_72_P376848	C2orf68	AC_000045;AC_000134;NC_000002;NM_001013649;NP_001013671;NT_022184;NW_001838769;NW_927719	AAI11484;AAI11484.1;AC012454;AC016753;AC_000045;AC_000134;AK024174;AK092972;AK124808;AK300003;AK311297;BAC85956;BAC85956.1;BAG61822;BAG61822.1;BC057834;BC111483;BU619982;CH471053;CN303296;EAW99495;EAW99495.1;NC_000002;NM_001013649;NP_001013671;NT_022184;NW_001838769;NW_927719;Q2NKX9	B4DT10;Q2NKX9;Q4G0J7;Q6ZVA6	C2orf68	chromosome 2 open reading frame 68	OTTHUMP00000203084; hypothetical protein LOC388969	UPF0561 protein C2orf68	-0.4512	0.008812
13	A_72_P062841	CALB1	AC_000051;AC_000140;NC_000008;NM_004929;NP_004920;NT_008046;NW_001839136;NW_923984	AAA98991;AAA98991.1;AAA98992;AAA98992.1;AAB19408;AAC14672;AAC14672.1;AAC25277;AAC62230;AAC62230.1;AAH06478;AAH06478.1;AAH20864;AAH20864.1;AC004612;AC123779;AC_000051;AC_000140;AF049895;AF068862;AF070717;AK054881;AK295585;AK312491;AK315959;BAG35393;BAG51438;BAH12116;BAH14330;BC006478;BC020864;BX537530;CAA29860;CAA29860.1;CH471060;EAW91665;EAW91666;M19878;M19879;NC_000008;NM_004929;NP_004920;NT_008…	P05937	CALB1	calbindin 1, 28kDa	calbindin; calbindin D28; OTTHUMP00000225441; RTVL-H protein; OTTHUMP00000166027; calbindin 1, (28kD); D-28K; vitamin D-dependent calcium-binding protein, avian-type	Calbindin	-0.3598	0.008199
14	A_72_P374908;A_72_P226042	CD3	AC_000044;AC_000133;NC_000001;NG_007384;NM_000734;NM_198053;NP_000725;NP_932170;NT_004487;NW_001838532;NW_926128	A46461;AAA60394;AAA60394.1;AAB22030;AAB24602;AAF34793;AAH25703;AAH25703.1;AAY57330;AAY57330.1;ABM84704;ABW03642;ACC61185;AC_000044;AC_000133;AF228312;AI420774;AK128376;AK223325;AK313946;AL031733;AL359962;AL557555;BAC87407;BAD97045;BAG36664;BAG36664.1;BC025703;BI819937;CAH69974;CAH69974.1;CAH69975;CAH69975.1;CAI21380;CAI21380.1;CAI21381;CAI21381.1;CH471067;CR601423;CR614814;CR615998;CR619292;CR625…	B1AK49;P20963;Q5VX13;Q8TAX4	CD247	CD247 molecule	T-cell receptor T3 zeta chain; CD3Z antigen, zeta polypeptide (TiT3 complex); CD3z antigen, zeta polypeptide (TiT3 complex); OTTHUMP00000032544; CD247 antigen; OTTHUMP00000032543; T-cell antigen receptor complex, zeta subunit of CD3; T-cell surface glycoprotein CD3 zeta chain; CD247 antigen, zeta subunit		-0.7559	0.001184
15	A_72_P374908;A_72_P226042	CD3 zeta	AC_000044;AC_000133;NC_000001;NG_007384;NM_000734;NM_198053;NP_000725;NP_932170;NT_004487;NW_001838532;NW_926128	A46461;AAA60394;AAA60394.1;AAB22030;AAB24602;AAF34793;AAH25703;AAH25703.1;AAY57330;AAY57330.1;ABM84704;ABW03642;ACC61185;AC_000044;AC_000133;AF228312;AI420774;AK128376;AK223325;AK313946;AL031733;AL359962;AL557555;BAC87407;BAD97045;BAG36664;BAG36664.1;BC025703;BI819937;CAH69974;CAH69974.1;CAH69975;CAH69975.1;CAI21380;CAI21380.1;CAI21381;CAI21381.1;CH471067;CR601423;CR614814;CR615998;CR619292;CR625…	B1AK49;P20963;Q5VX13;Q8TAX4	CD247	CD247 molecule	T-cell receptor T3 zeta chain; CD3Z antigen, zeta polypeptide (TiT3 complex); CD3z antigen, zeta polypeptide (TiT3 complex); OTTHUMP00000032544; CD247 antigen; OTTHUMP00000032543; T-cell antigen receptor complex, zeta subunit of CD3; T-cell surface glycoprotein CD3 zeta chain; CD247 antigen, zeta subunit	T-cell surface glycoprotein CD3 zeta chain	-0.7559	0.001184
16	A_72_P393078;A_72_P024756	CD36	AC_000050;AC_000068;AC_000139;NC_000007;NG_008192;NM_000072;NM_001001547;NM_001001548;NM_001127443;NM_001127444;NP_000063;NP_001001547;NP_001001548;NP_001120915;NP_001120916;NT_007933;NT_079595;NW_001839063;NW_923574	AA846141;AAA16068;AAA16068.1;AAA35534;AAA35534.1;AAA58412;AAA58412.1;AAA58413;AAA58413.1;AAB28992;AAB28992.1;AAB46390;AAD13993;AAD13993.1;AAD14933;AAG60624;AAG60625;AAG60625.1;AAG60626;AAG60626.1;AAG60627;AAG60627.1;AAG60628;AAG60629;AAG60630;AAG60631;AAG60632;AAG60632.1;AAG60633;AAG60633.1;AAG60634;AAG60634.1;AAG60635;AAG60636;AAG60637;AAG60638;AAG60638.1;AAG60639;AAG60639.1;AAH08406;AAH08406.1;…	P16671;Q13966;Q16093;Q8TCV7;Q9BPZ8;Q9BQC2;Q9BZM8;Q9BZN3;Q9BZN4;Q9BZN5	CD36	CD36 molecule (thrombospondin receptor)	glycoprotein IIIb; fatty acid translocase; cluster determinant 36; platelet glycoprotein 4; GPIIIB; OTTHUMP00000207872; leukocyte differentiation antigen CD36; PAS IV; CD36 antigen (collagen type I receptor, thrombospondin receptor); OTTHUMP00000207881; OTTHUMP00000207874; OTTHUMP00000207879; OTTHUMP00000229733; platelet glycoprotein IV; PAS-4 protein; OTTHUMP00000207938; scavenger receptor class…	Platelet glycoprotein 4	0.5139	0.004648
17	A_72_P088376	CD40(TNFRSF5)	AC_000063;AC_000152;NC_000020;NG_007279;NM_001250;NM_152854;NP_001241;NP_690593;NT_011362;NW_001838666;NW_927339	AAH12419;AAH12419.1;AAH64518;AAO43990;AAO43990.1;AAR84238;AAR84238.1;AAV38704;AAV38704.1;AB209660;ABK41937;ABK41937.1;ABM82730;ABM85914;AC_000063;AC_000152;AJ300189;AK222896;AL035662;AY225405;AY504960;BAD92897;BAD96616;BAD96616.1;BC012419;BC064518;BM761221;BT019901;CAA43045.1;CAC17670;CAC17670.1;CAC29424;CAC29424.1;CAI42973;CAI42973.1;CAJ00027;CAJ00028;CAJ00033;CAJ00034;CAJ00124;CAJ00125;CAJ00728…	E1P5S9;P25942;Q53GN5;Q5JY15;Q5U007;Q7M4Q8;Q86YK5;Q9BYU0	CD40	CD40 molecule, TNF receptor superfamily member 5	CD40 type II isoform; nerve growth factor receptor-related B-lymphocyte activation molecule; CD40L receptor; B cell surface antigen CD40; B-cell surface antigen CD40; tumor necrosis factor receptor superfamily member 5; OTTHUMP00000031699; OTTHUMP00000031701; tumor necrosis factor receptor superfamily, member 5; CD40 antigen (TNF receptor superfamily member 5); B cell-associated molecule; OTTHUMP…	Tumor necrosis factor receptor superfamily member 5	0.4332	0.007107
18	A_72_P292384	CES1	AC_000059;AC_000138;AC_000148;NC_000016;NG_012057;NM_001025194;NM_001025195;NM_001266;NP_001020365;NP_001020366;NP_001257;NT_010498;NW_001838290;NW_001838974;NW_003315945;NW_926462;NW_927277	AAA16036;AAA16036.1;AAA35649;AAA35649.1;AAA35650;AAA35650.1;AAA35711;AAA35711.1;AAA83932;AAA83932.1;AAC60631;AAC60631.2;AAD53175;AAD53175.1;AAH12418;AAH12418.1;AAI10339;AAI10339.1;AAP20868;AAP20868.1;AB025026;AB119995;AB119996;AB119997;AB119998;AB187224;AB210087;AB210088;AB210089;AB210090;ABM82398;ABM85582;AC020766;AC147362;AC_000059;AC_000138;AC_000148;AF177775;AK290623;AK292209;AK301651;AU13963…	A6NIM1;A8K3K8;A8K844;P23141;P82127;Q00015;Q13657;Q14062;Q16737;Q16788;Q549X7;Q549X8;Q86UK2;Q96EE8;Q9UC52;Q9UDG8;Q9UK77;Q9ULY2	CES1	carboxylesterase 1	carboxylesterase 1 (monocyte/macrophage serine esterase 1); carboxylesterase 2 (liver); acyl coenzyme A:cholesterol acyltransferase; acyl-coenzyme A:cholesterol acyltransferase; liver carboxylesterase 1; retinyl ester hydrolase; brain carboxylesterase hBr1; cocaine carboxylesterase; monocyte/macrophage serine esterase; REH; serine esterase 1; egasyn; cholesteryl ester hydrolase; triacylglycerol h…	Liver carboxylesterase 1	-0.7017	0.007144
19	A_72_P317483	CIP29	AC_000055;AC_000144;NC_000012;NM_033082;NP_149073;NR_026722;NR_026723;NT_029419;NW_001838059;NW_925395	AAF28994;AAF28994.1;AAH07099;AAH07099.1;AAH93051;AAM09686;AAM09686.1;ABZ92475;AC023055;AC073487;AC_000055;AC_000144;AF161434;AF486281;AJ409089;AK222719;AK290508;BAF83197;BAF83197.1;BC007099;BC093051;BI520421;CAC37950;CAC37950.1;CH471054;CR593273;CR610192;EAW96838;EAW96838.1;EU446946;NC_000012;NM_033082;NP_149073;NR_026722;NR_026723;NT_029419;NW_001838059;NW_925395;P82979;Q567R9	A8K393;P82979;Q9P066	SARNP	SAP domain containing ribonucleoprotein	hepatocellular carcinoma 1; cytokine-induced protein of 29 kDa; nuclear protein Hcc-1; SAP domain-containing ribonucleoprotein; proliferation associated cytokine-inducible protein CIP29; cytokine induced protein 29 kDa; proliferation-associated cytokine-inducible protein CIP29	SAP domain-containing ribonucleoprotein	0.2461	0.002607
20	A_72_P218187	COIL	AC_000060;AC_000149;NC_000017;NM_004645;NP_004636;NT_010783;NW_001838448;NW_926894	AAA36412;AAA36412.1;AAB81550;AAB81550.1;AAH10385;AAH10385.1;ABM83853;ABM87175;AC004584;AC_000060;AC_000149;AK313616;AW021880;BAG36378;BAG36378.1;BC010385;CH471109;CR594693;CR605137;CR610327;CR611341;DQ892927;DQ896176;EAW94522;EAW94522.1;M58411;NC_000017;NM_004645;NP_004636;NT_010783;NW_001838448;NW_926894;P38432;U06632	B2R931;P38432	COIL	coilin	p80; coilin p80	Coilin	1.228	0.005087
21	A_72_P146661	CYP2C18	AC_000053;AC_000142;NC_000010;NG_008373;NM_000772;NM_001128925;NP_000763;NP_001122397;NT_030059;NW_001838005;NW_924884	AAA02630;AAA02630.1;AAB59356;AAB59356.1;AAH69666;AAH69666.1;AAH96257;AAH96257.1;AAH96258;AAH96258.1;AAH96260;AC_000053;AC_000142;ADQ31959;AK223510;AK308558;AK313403;AL157835;AL583836;BAD97230;BAG36199;BAG36199.1;BC069666;BC096257;BC096258;BC096259;BC096260;BJ993698;BX538127;CAA39833;CAD98029;CAH74067;CAH74067.1;CH471066;EAW50024;EAW50024.1;HQ447473;L16869;L16870;L16871;L16872;L16873;L16874;L16875…	B2R8K2;P33260;Q16703;Q16751;Q6GRG1	CYP2C18	cytochrome P450, family 2, subfamily C, polypeptide 18	(S)-mephenytoin hydroxylase associated cytochrome P450; CYPIIC18; cytochrome P450-6B/29C; cytochrome P450 2C18; cytochrome P450, subfamily IIC (mephenytoin 4-hydroxylase), polypeptide 18; unspecific monooxygenase; microsomal monooxygenase; flavoprotein-linked monooxygenase; cytochrome P450, subfamily IIC (mephenytoin 4-hydroxylase), polypeptide 17; OTTHUMP00000020131	Cytochrome P450 2C18	-0.6381	0.004157
22	A_72_P146661	CYP2C19	AC_000053;AC_000142;NC_000010;NG_008384;NM_000769;NP_000760;NT_030059;NW_001838005;NW_924884	AAA36660.1;AAA52145.1;AAB59426;AAB59426.1;AAI11847;AAL31347;AAL31347.1;AAL31348;AAL31348.1;AAV41877;AAV41877.1;AB113829;AC_000053;AC_000142;AL133513;AL583836;AY796203;BAD02827;BC111846;CAA46778;CAH73444;CAH73444.1;CAH74068;CAH74068.1;L07093;L31506;L31507;L32982;L32983;L39097;L39098;L39099;L39100;L39101;L39102;M61854;M61858;NC_000010;NG_008384;NM_000769;NP_000760;NT_030059;NW_001838005;NW_924884;P…	P33259;P33261;Q8WZB1;Q8WZB2;Q9UCD4	CYP2C19	cytochrome P450, family 2, subfamily C, polypeptide 19	cytochrome P450-11A; mephenytoin 4'-hydroxylase; (S)-limonene 7-monooxygenase; mephenytoin 4-hydroxylase; cytochrome P450 2C19; (S)-limonene 6-monooxygenase; flavoprotein-linked monooxygenase; cytochrome P450, subfamily IIC (mephenytoin 4-hydroxylase), polypeptide 19; CYPIIC19; (R)-limonene 6-monooxygenase; S-mephenytoin 4-hydroxylase; OTTHUMP00000020132; microsomal monooxygenase; cytochrome P-45…	Cytochrome P450 2C19	-0.6381	0.004157
23	A_72_P146661	CYP2C8	AC_000053;AC_000142;NC_000010;NG_007972;NM_000770;NM_001198853;NM_001198854;NM_001198855;NP_000761;NP_001185782;NP_001185783;NP_001185784;NT_030059;NW_001838005;NW_924884	AAA35739;AAA35739.1;AAA35740;AAA35740.1;AAA52160;AAA52160.1;AAA52161;AAA52161.1;AAH20596;AAH20596.1;AAR89907;AAR89907.1;ABM82326;ABM85505;AC_000053;AC_000142;AK292753;AK293327;AK293328;AK298401;AK303813;AK315823;AL359672;AY514490;BAF85442;BAF85442.1;BAF98714;BAF98714.1;BAH11491;BAH11492;BAH12777;BAH14057;BC020596;CAA35915;CAA35915.1;CAA38578;CAA38578.1;CAA68550;CAA68550.1;CAH71307;CAH71307.1;CD01…	A8K9N8;B0AZN2;P10632;Q5VX93;Q8WWB1;Q9UCZ9	CYP2C8	cytochrome P450, family 2, subfamily C, polypeptide 8	OTTHUMP00000020134; cytochrome P450 MP-12; cytochrome P450 MP-20; cytochrome P450 IIC2; s-mephenytoin 4-hydroxylase; cytochrome P450, subfamily IIC (mephenytoin 4-hydroxylase), polypeptide 8; cytochrome P450 2C8; cytochrome P450 form 1; xenobiotic monooxygenase; microsomal monooxygenase; P450 form 1; OTTHUMP00000233373; flavoprotein-linked monooxygenase	Cytochrome P450 2C8	-0.6381	0.004157
24	A_72_P146661	CYP2C9	AC_000053;AC_000142;NC_000010;NG_008385;NM_000771;NP_000762;NT_030059;NW_001838005;NW_924884	AAA52157;AAA52157.1;AAA52158;AAA52158.1;AAA52159;AAA52159.1;AAB23864;AAB23864.2;AAD13466;AAD13467;AAH20754;AAH70317;AAI25055;AAP88931;AAP88931.1;AAT94065;AAT94065.1;AAW83816;AC_000053;AC_000142;AK289420;AK298458;AL359672;AY341248;AY702706;AY904366;BAA00123;BAA00123.1;BAF82109;BAG60671;BC020754;BC070317;BC125054;BJ993098;CAH71303;CH471066;D00173;EAW50019;EAW50020;L16880;L16883;M15331;M21939;M21940…	P11712;P11713;Q16756;Q16872	CYP2C9	cytochrome P450, family 2, subfamily C, polypeptide 9	flavoprotein-linked monooxygenase; cytochrome P450 PB-1; cytochrome P450 2C9; cytochrome P-450MP; cytochrome P450, subfamily IIC (mephenytoin 4-hydroxylase), polypeptide 9; cytochrome P-450 S-mephenytoin 4-hydroxylase; microsomal monooxygenase; xenobiotic monooxygenase; OTTHUMP00000020135	Cytochrome P450 2C9	-0.6381	0.004157
25	A_72_P200537	Calcineurin B (regulatory)	AC_000045;AC_000134;NC_000002;NM_000945;NP_000936;NT_022184;NW_001838769;NW_927719	AAB08721.1;AAH27913;AAH27913.1;AAY14715;AAY14715.1;AC017083;AC_000045;AC_000134;AK307136;AK314893;BAG37407;BAG37407.1;BC027913;BM468705;BQ228635;CAG33219;CAG33219.1;CH471053;CR456938;CR593156;EAW99878;EAW99878.1;M30773;NC_000002;NM_000945;NP_000936;NT_022184;NW_001838769;NW_927719;P63098	B2RC10;B5MDU4;P06705;P15117;P63098;Q08044;Q53SL0	PPP3R1	protein phosphatase 3, regulatory subunit B, alpha	calcineurin subunit B type 1; OTTHUMP00000201960; OTTHUMP00000201961; protein phosphatase 2B regulatory subunit 1; protein phosphatase 3 (formerly 2B), regulatory subunit B, alpha isoform; calcineurin B, type I (19kDa); protein phosphatase 2B regulatory subunit B alpha; OTTHUMP00000201952; protein phosphatase 3 (formerly 2B), regulatory subunit B, 19kDa, alpha isoform (calcineurin B, type I); pro…		-0.5512	0.00273
26	A_72_P200537	Calcineurin B (regulatory)	AC_000052;AC_000141;NC_000009;NM_147180;NP_671709;NT_008470;NW_001839236;NW_924539	AAH30595;AAH30595.1;AAH66299;AAH66299.1;AAL40395;AAL40395.1;AAP57772;AAP57772.1;AAP97278;AAP97278.1;AC_000052;AC_000141;ADZ15934;AF085237;AF145026;AF400667;AK057524;AL591377;BAB71521;BAB71521.1;BC030595;BC066299;CAH69961;CAH69961.1;CBH19417;CBH30592;CH471105;EAW58961;EAW58961.1;HC007224;HC044525;JF432717;NC_000009;NM_147180;NP_671709;NT_008470;NW_001839236;NW_924539;Q96LZ3	Q5VTR4;Q7Z4V8;Q8WYJ4;Q96LZ3	PPP3R2	protein phosphatase 3, regulatory subunit B, beta	calcineurin B, type II (19kDa); OTTHUMP00000021813; calcineurin BII; CNBII; CBLP; protein phosphatase 3 (formerly 2B), regulatory subunit B, beta isoform; protein phosphatase 2B regulatory subunit 2; protein phosphatase 3 regulatory subunit B beta isoform; PPP3R1-like; protein phosphatase 3 (formerly 2B), regulatory subunit B, 19kDa, beta isoform (calcineurin B, type II); protein phosphatase 3 (f…		-0.5512	0.00273
27	A_72_P200537	Calcineurin B1	AC_000045;AC_000134;NC_000002;NM_000945;NP_000936;NT_022184;NW_001838769;NW_927719	AAB08721.1;AAH27913;AAH27913.1;AAY14715;AAY14715.1;AC017083;AC_000045;AC_000134;AK307136;AK314893;BAG37407;BAG37407.1;BC027913;BM468705;BQ228635;CAG33219;CAG33219.1;CH471053;CR456938;CR593156;EAW99878;EAW99878.1;M30773;NC_000002;NM_000945;NP_000936;NT_022184;NW_001838769;NW_927719;P63098	B2RC10;B5MDU4;P06705;P15117;P63098;Q08044;Q53SL0	PPP3R1	protein phosphatase 3, regulatory subunit B, alpha	calcineurin subunit B type 1; OTTHUMP00000201960; OTTHUMP00000201961; protein phosphatase 2B regulatory subunit 1; protein phosphatase 3 (formerly 2B), regulatory subunit B, alpha isoform; calcineurin B, type I (19kDa); protein phosphatase 2B regulatory subunit B alpha; OTTHUMP00000201952; protein phosphatase 3 (formerly 2B), regulatory subunit B, 19kDa, alpha isoform (calcineurin B, type I); pro…	Calcineurin subunit B type 1	-0.5512	0.00273
28	A_72_P200537	Calcineurin B2	AC_000052;AC_000141;NC_000009;NM_147180;NP_671709;NT_008470;NW_001839236;NW_924539	AAH30595;AAH30595.1;AAH66299;AAH66299.1;AAL40395;AAL40395.1;AAP57772;AAP57772.1;AAP97278;AAP97278.1;AC_000052;AC_000141;ADZ15934;AF085237;AF145026;AF400667;AK057524;AL591377;BAB71521;BAB71521.1;BC030595;BC066299;CAH69961;CAH69961.1;CBH19417;CBH30592;CH471105;EAW58961;EAW58961.1;HC007224;HC044525;JF432717;NC_000009;NM_147180;NP_671709;NT_008470;NW_001839236;NW_924539;Q96LZ3	Q5VTR4;Q7Z4V8;Q8WYJ4;Q96LZ3	PPP3R2	protein phosphatase 3, regulatory subunit B, beta	calcineurin B, type II (19kDa); OTTHUMP00000021813; calcineurin BII; CNBII; CBLP; protein phosphatase 3 (formerly 2B), regulatory subunit B, beta isoform; protein phosphatase 2B regulatory subunit 2; protein phosphatase 3 regulatory subunit B beta isoform; PPP3R1-like; protein phosphatase 3 (formerly 2B), regulatory subunit B, 19kDa, beta isoform (calcineurin B, type II); protein phosphatase 3 (f…	Calcineurin subunit B type 2	-0.5512	0.00273
29	A_72_P040678	Calcipressin 2	AC_000049;AC_000138;NC_000006;NM_005822;NP_005813;NT_007592;NW_001838981;NW_923073	AAH38509;AAK59805;AAK59805.1;AAK59806;AAK59806.1;ABM82584;ABM85771;AC_000049;AC_000138;AK090990;AK312392;AL359633;AL390741;AY034085;AY034086;BAA11911;BAA11911.1;BAG35309;BAG52258;BAG52258.1;BC038509;BM728501;CAH73259;CAH73259.1;CAH73260;CAH73260.1;CAI16754;CAI16754.1;CH471081;CR604948;D83407;DA207634;DQ891658;DQ894845;EAX04294;EAX04294.1;NC_000006;NM_005822;NP_005813;NT_007592;NW_001838981;NW_923…	A6ND07;B3KR46;Q14206;Q5VWF7;Q5VWF8;Q8N116	RCAN2	regulator of calcineurin 2	myocyte-enriched calcineurin-interacting protein 2; thyroid hormone-responsive protein ZAKI-4; OTTHUMP00000016544; thyroid hormone-responsive (skin fibroblasts); Down syndrome candidate region 1-like 1; Calcipressin 2 (Thyroid hormone-responsive protein ZAKI-4) (Down syndrome candidate region 1-like 1) (Myocyte-enriched calcineurin interacting protein 2) (MCIP2); calcipressin-2; Down syndrome cri…	Calcipressin-2	0.7927	0.008467
30	A_72_P209077	Calponin-3	AC_000044;AC_000133;NC_000001;NM_001839;NP_001830;NT_032977;NW_001838589;NW_921795	AAB35752;AAB35752.1;AAH25372;AAH25372.1;ABM83939;ABM87257;AC093429;AC105942;AC_000044;AC_000133;AK294141;AK298145;AK312370;AK316398;AL359554;BAG35288;BAG57467;BAG60421;BAH14769;BC025372;BM669529;BU149686;BU608403;CA944820;CAC36092;CAC36093;CAC36093.1;CAG46646;CH471097;CN418286;CR541848;CR618809;CR619086;CR622382;DC422152;DQ893013;DQ896258;DR157009;EAW73029;NC_000001;NM_001839;NP_001830;NT_032977;…	Q15417	CNN3	calponin 3, acidic	OTTHUMP00000012470; calponin-3; calponin, acidic isoform; dJ639P13.2.2 (acidic calponin 3); OTTHUMP00000012471	Calponin-3	0.305	0.004621
31	A_72_P402718	Calreticulin	AC_000062;AC_000151;NC_000019;NM_004343;NP_004334;NT_011295;NW_001838483;NW_927195	AAA36582;AAA36582.1;AAA51916;AAA51916.1;AAB51176;AAB51176.1;AAH02500;AAH02500.1;AAH07911;AAH07911.1;AAH20493;AAH20493.1;AAL13126;AAL13126.1;AAP36116;AAP36116.1;AB451408;AC092069;AC_000062;AC_000151;AD000092;AF087986;AK130190;AK223060;AK295230;AK304492;AY047586;BAD96780;BAG58223;BAG65301;BAG70222;BAG70222.1;BC002500;BC007911;BC020493;BC107102;BT007448;CAG33351;CAG33351.1;CAK18761;CH471106;CR457070…	P27797;Q6IAT4;Q9UDG2	CALR	calreticulin	grp60; calregulin; endoplasmic reticulum resident protein 60; CRP55; autoantigen Ro; Sicca syndrome antigen A (autoantigen Ro; calreticulin); HACBP; ERp60	Calreticulin	-0.8343	0.002704
32	A_72_P165326;A_72_P054631	Caveolin-1	AC_000050;AC_000068;AC_000139;NC_000007;NG_012051;NM_001172895;NM_001172896;NM_001172897;NM_001753;NP_001166366;NP_001166367;NP_001166368;NP_001744;NT_007933;NT_079596;NW_001839071;NW_923640	AAB82538;AAD23745;AAD23745.1;AAD34722;AAD34722.1;AAH09685;AAH09685.1;AAH82246;AAH82246.1;AAP35807;AAP35807.1;AAQ13608;AAX07830;AB209926;AB451284;AB451416;ABM81573;ABM84753;ABW03274;ABW22625;ABW22626;AC006159;AC_000050;AC_000068;AC_000139;AF019742;AF070648;AF074993;AF095591;AF095592;AF095593;AF125348;AF172085;AI878826;AJ133269;AK290871;AK307501;AL133639;AM393679;AY762103;BAD93163;BAF83560;BAG70098…	Q03135;Q9UGP1;Q9UNG1;Q9UQH6	CAV1	caveolin 1, caveolae protein, 22kDa	OTTHUMP00000195988; caveolin-1; OTTHUMP00000195989; caveolin 1, caveolae protein, 22kD; OTTHUMP00000196475; cell growth-inhibiting protein 32; OTTHUMP00000198308; OTTHUMP00000025031	Caveolin-1	0.6837	0.002019
33	A_72_P036021;A_72_P165196	Coagulation factor X	AC_000056;AC_000145;NC_000013;NG_009258;NM_000504;NP_000495;NT_027140;NW_001838085;NW_925517	AAA51984;AAA51984.1;AAA52421;AAA52421.1;AAA52486;AAA52486.1;AAA52490;AAA52490.1;AAA52636;AAA52636.1;AAA52764;AAA52764.1;AAH46125;AAH46125.1;AAM19347;AAM19347.1;AB005892;ACA06104;AC_000056;AC_000145;AF503510;AK310772;AK310775;AK313798;AL137002;BAA21634;BAG36534;BC040125;BC046125;CAI41385;CAI41386;CAL24230;CAX11893;CB158437;CH471085;CR603372;CR607773;CR623031;CS355178;EAX09184;EAX09185;EF445049;K01…	P00742;Q14340	F10	coagulation factor X	OTTHUMP00000018736; OTTHUMP00000202678; factor Xa; OTTHUMP00000018735; prothrombinase; Stuart-Prower factor	Coagulation factor X	-0.5308	0.008723
34	A_72_P177486	Collagen X	AC_000049;AC_000138;NC_000006;NG_008032;NG_021351;NM_000493;NP_000484;NT_025741;NW_001838990;NW_923184	AAA61221;AAA61221.1;AAB31113;AAC60615;AAC60615.1;AAI30622;AAI30622.1;AAI30624;AAI30624.1;AC_000049;AC_000138;AL121963;BC130621;BC130623;BI521533;CA447328;CAA41686;CAA41686.1;CAA42933;CAA42933.1;CAA46236;CAA46236.1;CAA51170;CAA51170.1;CAA67178;CAA67178.1;CAB87590;CAB87590.1;CAI19529;CAI19530;CH471051;EAW48240;EAW48240.1;M74050;NC_000006;NG_008032;NG_021351;NM_000493;NP_000484;NT_025741;NW_00183899…	A1L4P2;Q03692	COL10A1	collagen, type X, alpha 1	collagen alpha-1(X) chain; OTTHUMP00000017051; collagen X, alpha-1 polypeptide; Schmid metaphyseal chondrodysplasia	Collagen alpha-1(X) chain	-0.2916	0.008712
35	A_72_P396583;A_72_P242557	DHRS1	AC_000057;AC_000146;NC_000014;NM_001136050;NM_138452;NP_001129522;NP_612461;NT_026437;NW_001838110;NW_925539	AAH14057;AAH14057.1;AAH15943;AAH15943.1;AAN32660;AAN32660.1;AC_000057;AC_000146;AF418205;AK058159;AK126383;AL050217;AL096870;AL833917;AM393043;AM393592;BAB71694;BAB71694.1;BC014057;BC015943;BC036845;BX247980;CAD38773;CAD38773.1;CAD62314;CAD62314.1;CAL37921;CAL38469;CH471078;CR591099;CR592622;CR598317;CR614520;CR625275;DB272453;EAW66036;EAW66036.1;EAW66037;EAW66037.1;EAW66038;EAW66039;EAW66040;EAW…	D3DS71;Q8NDG3;Q96B59;Q96CQ5;Q96LJ7	DHRS1	dehydrogenase/reductase (SDR family) member 1	short chain dehydrogenase/reductase family 19C, member 1; OTTHUMP00000164786; OTTHUMP00000028176; dehydrogenase/reductase SDR family member 1	Dehydrogenase/reductase SDR family member 1	-0.5915	0.00236
36	A_72_P165231	E-FABP	AC_000051;AC_000140;NC_000008;NG_028154;NM_001444;NP_001435;NT_008183;NW_001839133;NW_923929	AAA58467;AAA58467.1;AAH19385;AAH19385.1;AAH70303;AAH70303.1;AAP36117;AAP36117.1;ABM82211;ABM85396;AC009902;AC_000051;AC_000140;ADU05470;AK226036;AK311856;BAG34797;BAG34797.1;BC019385;BC070303;BT007449;CH471068;CN278427;DQ891285;DQ894470;EAW87088;EAW87088.1;HQ384161;M94856;NC_000008;NG_028154;NM_001444;NP_001435;NT_008183;NW_001839133;NW_923929;Q01469	B2R4K0;Q01469	FABP5	fatty acid binding protein 5 (psoriasis-associated)	psoriasis-associated fatty acid-binding protein homolog; fatty acid-binding protein, epidermal; OTTHUMP00000166022; OTTHUMP00000166021; epidermal-type fatty acid-binding protein	Fatty acid-binding protein, epidermal	1.07	0.00302
37	A_72_P225102	EBI3	AC_000062;AC_000151;NC_000019;NM_005755;NP_005746;NT_011255;NW_001838477;NW_927173	AAA93193;AAA93193.1;AAC33488;AAC33488.1;AAH15364;AAH15364.1;AAH46112;AAH46112.1;ABK41923.1;ABM82515;ABW03382;AC005578;AC_000062;AC_000151;BC015364;BC046112;CBX32665;CBX32666;CH471139;CR592116;CR592737;CR598195;CR602081;CR604910;CR606815;CR608081;CR610744;CR615391;CR615695;CR616709;CR626045;DQ891589;EAW69244;EAW69245;EAW69245.1;EF064740;EU176581;HH821931;HH821932;L08187;NC_000019;NM_005755;NP_0057…	A0N0N2;O75269;Q14213	EBI3	Epstein-Barr virus induced 3	IL35 subunit; EBV-induced gene 3 protein; epstein-Barr virus-induced gene 3 protein; Epstein-Barr virus induced gene 3; IL27 subunit; interleukin-27 subunit beta; cytokine receptor; IL-27 subunit beta	Interleukin-27 subunit beta	0.5268	0.003114
38	A_72_P136481	ETNK2	AC_000044;AC_000133;NC_000001;NM_018208;NP_060678;NT_004487;NW_001838533;NW_926128	AAH10082;AAH10082.1;AB073608;AC_000044;AC_000133;AK001623;AK293426;AK302145;AK316493;AL592146;BAA91793;BAA91793.1;BAD38645;BAD38645.1;BAH11503;BAH13637;BAH13637.1;BAH14864;BC010082;CAI16598;CAI16600;CAI16601;CAI16602;CAI16602.1;CAI16603;CAI16603.1;CH471067;DB454429;EAW91501;EAW91501.1;EAW91502;EAW91502.1;EAW91503;EAW91504;NC_000001;NM_018208;NP_060678;NT_004487;NW_001838533;NW_926128;Q5SXX4;Q5SXX…	B7Z7K1;Q5SXX5;Q68CK3;Q96G05;Q9NVF9	ETNK2	ethanolamine kinase 2	EKI 2; ethanolamine kinase-like protein; OTTHUMP00000034314; OTTHUMP00000034313	Ethanolamine kinase 2	-0.6794	0.003692
39	A_72_P203842	EZH1	AC_000060;AC_000149;NC_000017;NM_001991;NP_001982;NT_010783;NW_001838436;NW_926828;XR_109385;XR_111700;XR_115105	AAB59574;AAB59574.1;AAC50778;AAC50778.1;AAH15882;AAH15882.1;AAP88784;AAP88784.1;AB002386;AB004818;AC100793;AC_000060;AC_000149;AK295626;AK295853;AK299887;AK304835;AK309121;AK310399;AK310556;AK311237;AL833159;BAA20842;BAA20842.2;BAA25019;BAA25019.1;BAG58503;BAG58503.1;BAG58659;BAG58659.1;BAG61734;BAG61734.1;BAG65579;BAG65579.1;BC015882;BT009782;CH471152;DC333017;EAW60870;EAW60870.1;EAW60871;L38934…	A6NCH6;B4DIJ1;B4DIZ7;B4DSS2;B4E3R7;O43287;Q14459;Q53XP3;Q92800	EZH1	enhancer of zeste homolog 1 (Drosophila)	ENX-2; histone-lysine N-methyltransferase EZH1; enhancer of zeste (Drosophila) homolog 1	Histone-lysine N-methyltransferase EZH1	-0.2957	0.004182
40	A_72_P410233	FAM149B1	AC_000053;AC_000142;NC_000010;NM_173348;NP_775483;NT_030059;NW_001837987;NW_924796	AAH15394;AAH15394.1;AB023191;AC016394;AC_000053;AC_000142;ADZ15330;AK023439;AK025189;AK303436;BAA76818;BAA76818.1;BAG51194;BAG64484;BC015394;BM977866;CH471083;DC340839;EAW54482;JF432113;NC_000010;NM_173348;NP_775483;NT_030059;NW_001837987;NW_924796;Q96BN6	Q96BN6;Q9Y2I0	FAM149B1	family with sequence similarity 149, member B1	hypothetical protein LOC317662; KIAA0974; OTTHUMP00000071136; OTTHUMP00000071138	Protein FAM149B1	-0.2418	0.009997
41	A_72_P276254;A_72_P066791	FBX6	AC_000044;AC_000133;NC_000001;NM_018438;NP_060908;NT_021937;NW_001838534;NW_923572	AAF04470;AAF04470.1;AAF67153;AAF67153.1;AAH20880;AAH20880.1;AC_000044;AC_000133;ADQ32156;AF129536;AF233223;AK314989;AL031731;BAG37485;BAG37485.1;BC020880;CAI20214;CAI20214.1;CAI20215;CAI20215.1;CH471130;EAW71696;EAW71696.1;HQ447671;NC_000001;NM_018438;NP_060908;NT_021937;NW_001838534;NW_923572;Q9NRD1	B1AK42;B2RC88;Q9NRD1;Q9UKT3	FBXO6	F-box protein 6	F-box protein FBG2; F-box protein that recognizes sugar chains 2; F-box only protein 6; F-box/G-domain protein 2; OTTHUMP00000002268; F-box protein Fbx6; OTTHUMP00000002267	F-box only protein 6	0.5456	0.001948
42	A_72_P165231	Fatty acid-binding protein	AC_000051;AC_000140;NC_000008;NG_028154;NM_001444;NP_001435;NT_008183;NW_001839133;NW_923929	AAA58467;AAA58467.1;AAH19385;AAH19385.1;AAH70303;AAH70303.1;AAP36117;AAP36117.1;ABM82211;ABM85396;AC009902;AC_000051;AC_000140;ADU05470;AK226036;AK311856;BAG34797;BAG34797.1;BC019385;BC070303;BT007449;CH471068;CN278427;DQ891285;DQ894470;EAW87088;EAW87088.1;HQ384161;M94856;NC_000008;NG_028154;NM_001444;NP_001435;NT_008183;NW_001839133;NW_923929;Q01469	B2R4K0;Q01469	FABP5	fatty acid binding protein 5 (psoriasis-associated)	psoriasis-associated fatty acid-binding protein homolog; fatty acid-binding protein, epidermal; OTTHUMP00000166022; OTTHUMP00000166021; epidermal-type fatty acid-binding protein		1.07	0.00302
43	A_72_P320718	GBA3	AC_000047;AC_000136;NC_000004;NM_001128432;NM_020973;NP_001121904;NP_066024;NT_006316;NW_001838900;NW_922073	AAG39217;AAG39217.1;AAH29362;AAH29362.1;AAH70188;AAH70188.1;AAI01830;AAI01830.1;AAI09378;AAI09378.1;AAI36265;AAL37305;AAL37305.1;AB017913;AC093917;AC_000047;AC_000136;AF317840;AF323990;AJ278964;AK222963;AK292746;AK298377;AK313189;BAB18741;BAB18741.1;BAD96683;BAD96683.1;BAF85435;BAG36006;BAH12772;BC029362;BC070188;BC101829;BC109377;BC136264;CAC08178;CAC08178.1;CH471069;EAW92802;EAW92803;NC_000004;…	Q32LY7;Q3MIH4;Q53GG8;Q6NSF4;Q8NHT8;Q9H227;Q9H3T4;Q9H4C6	GBA3	glucosidase, beta, acid 3 (cytosolic)	cytosolic beta-glucosidase; klotho-related protein; cytosolic beta-glucosidase-like protein 1; OTTHUMP00000218214; OTTHUMP00000218216	Cytosolic beta-glucosidase	-0.4176	0.001571
44	A_72_P228947	GCL reg	AC_000044;AC_000133;NC_000001;NG_012072;NM_002061;NP_002052;NT_032977;NW_001838589;NW_921795	AAA65028;AAA65028.1;AAH41809;AAH41809.1;AAR29001;AAV28733;AAV28733.1;AC_000044;AC_000133;AK290449;AL049796;AL117351;AY382196;AY773965;BAF83138;BAF83138.1;BC041809;BE269549;BE866085;BF031933;BF213407;BF219130;BF246042;BF541340;BF541441;BF698337;BG291243;BG547387;BI497338;BM468805;BQ049850;BQ224592;BU600458;C17598;C18245;C18878;C18959;C19097;CAG46632;CAG46632.1;CAI21813;CAI21813.1;CAI22976;CAI22976…	A8K334;D3DT45;P48507;Q6FHC1;Q9NPX9;Q9NU74	GCLM	glutamate-cysteine ligase, modifier subunit	GSC light chain; glutamate--cysteine ligase modifier subunit; GCS light chain; glutamate--cysteine ligase regulatory subunit; gamma-ECS regulatory subunit; glutamate-cysteine ligase (gamma-glutamylcysteine synthetase), regulatory (30.8kD); OTTHUMP00000012299; glutamate-cysteine ligase regulatory protein; gamma-glutamylcysteine synthetase regulatory subunit	Glutamate--cysteine ligase regulatory subunit	-0.3835	0.00886
45	A_72_P325783	GPR116	AC_000049;AC_000138;NC_000006;NM_001098518;NM_015234;NP_001091988;NP_056049;NT_007592;NW_001838981;NW_923073	AAH50087;AAH66121;AAH66121.1;AAN46672;AAN46672.1;AAO85064;AAO85064.1;AAS21061;AAS21061.1;AB018301;AB031421;ACE86978;ACE87667;AC_000049;AC_000138;AI796309;AK075121;AK092043;AK289503;AK296948;AK300380;AL050295;AL096772;AL832125;AM393514;AY140958;AY255552;AY498875;BAA34478;BAA34478.2;BAD83582;BAF82192;BAG59494;BAG62115;BC036002;BC050087;BC066121;CAB43394;CAB43394.1;CAB61578;CAB61578.1;CAL38391;CH471…	O94858;Q5TF06;Q6RGN2;Q86SP0;Q8IZF2;Q9Y3Z2	GPR116	G protein-coupled receptor 116	OTTHUMP00000016557; probable G-protein coupled receptor 116; Ig-Hepta homolog	Probable G-protein coupled receptor 116	0.3013	0.0002699
46	A_72_P406683	Galpha(i)-specific EDG GPCRs	AC_000044;AC_000133;NC_000001;NM_012152;NP_036284;NT_032977;NW_001838589;NW_921795	AAD56311;AAD56311.1;AAF00530;AAF00530.1;AAF91291;AAI26269;AAI26269.1;AAI26271;AAI26271.1;AAP84360;AAP84360.1;AC104169;AC_000044;AC_000133;AF127138;AF186380;AF236117;AK308283;AL139150;AY322547;BC126268;BC126270;BC144021;BU633960;CH471097;EAW73222;NC_000001;NM_012152;NP_036284;NT_032977;NW_001838589;NW_921795;Q9NRB8;Q9UBY5	A0AVA3;Q9UBY5	LPAR3	lysophosphatidic acid receptor 3	calcium-mobilizing lysophosphatidic acid receptor LP-A3; LPA receptor EDG7; LPA-3; endothelial cell differentiation gene 7; endothelial differentiation, lysophosphatidic acid G-protein-coupled receptor, 7; LPA receptor 3; lysophosphatidic acid receptor Edg-7		-0.2583	0.006194
47	A_72_P406683	Galpha(q)-specific EDG GPCRs	AC_000044;AC_000133;NC_000001;NM_012152;NP_036284;NT_032977;NW_001838589;NW_921795	AAD56311;AAD56311.1;AAF00530;AAF00530.1;AAF91291;AAI26269;AAI26269.1;AAI26271;AAI26271.1;AAP84360;AAP84360.1;AC104169;AC_000044;AC_000133;AF127138;AF186380;AF236117;AK308283;AL139150;AY322547;BC126268;BC126270;BC144021;BU633960;CH471097;EAW73222;NC_000001;NM_012152;NP_036284;NT_032977;NW_001838589;NW_921795;Q9NRB8;Q9UBY5	A0AVA3;Q9UBY5	LPAR3	lysophosphatidic acid receptor 3	calcium-mobilizing lysophosphatidic acid receptor LP-A3; LPA receptor EDG7; LPA-3; endothelial cell differentiation gene 7; endothelial differentiation, lysophosphatidic acid G-protein-coupled receptor, 7; LPA receptor 3; lysophosphatidic acid receptor Edg-7		-0.2583	0.006194
48	A_72_P180661	Galpha(s)-specific prostanoid GPCRs	AC_000057;AC_000146;NC_000014;NG_013082;NM_000956;NP_000947;NT_026437;NW_001838111;NW_925539	AAA61681;AAA61681.1;AAD44177;AAD44177.1;AAH93927;AAH93927.1;AAH93929;AAH93929.1;AAP32303;AAP32303.1;ABD48958;ABD48958.1;AC_000057;AC_000146;AF134201;AF134202;AL365475;AY275471;BC093927;BC093929;BE739744;BF029797;BM986745;BQ014559;CAA58749;CAA58749.1;CF132756;CH471078;CN484094;CR977661;DQ398948;EAW65652;EAW65652.1;EAW65653;EAW65654;EAW65654.1;NC_000014;NG_013082;NM_000956;NP_000947;NT_026437;NW_00…	D3DSC0;P43116;Q52LG8	PTGER2	prostaglandin E receptor 2 (subtype EP2), 53kDa	PGE2 receptor EP2 subtype; PGE receptor EP2 subtype; prostanoid EP2 receptor; prostaglandin E receptor 2 (subtype EP2), 53kD; OTTHUMP00000178987; prostaglandin E2 receptor EP2 subtype		-0.2376	0.001914
49	A_72_P428414	HAI-2	AC_000062;AC_000151;NC_000019;NG_013372;NM_001166103;NM_021102;NP_001159575;NP_066925;NT_011109;NW_001838496;NW_927217	AAB84031;AAB84031.1;AAC02781;AAC02781.1;AAH01668;AAH01668.1;AAH07705;AAH07705.1;AAH11951;AAH11951.1;AAH11955;AAH11955.1;AAH12868;AAH12868.1;AAV38918;AAV38918.1;AAV38919;AAV38919.1;AAV38920;AAV38920.1;AB006534;AC011479;AC_000062;AC_000151;AF027205;AF231020;AI199013;AK127479;AK291532;AK297154;AW275313;BAA25024;BAA25024.1;BAF84221;BAF84221.1;BAG59653;BC001668;BC007705;BC011951;BC011955;BC012868;BT02…	A8K667;O00271;O14895;O43291;Q5TZQ3;Q969E0	SPINT2	serine peptidase inhibitor, Kunitz type, 2	hepatocyte growth factor activator inhibitor type 2; kunitz-type protease inhibitor 2; serine protease inhibitor, Kunitz type, 2; placental bikunin	Kunitz-type protease inhibitor 2	-0.4232	0.004867
50	A_72_P432449	HIGD1B	AC_000060;AC_000149;NC_000017;NM_016438;NP_057522;NT_010783;NW_001838437;NW_926839	AAH20667;AAH20667.1;AB038021;AB038022;AC015936;AC_000060;AC_000149;BAA90725;BAA90725.1;BAA90726;BAA90726.1;BC020667;CAJ42768;CH471178;CS185587;EAW51575;EAW51575.1;EAW51576;EAW51576.1;NC_000017;NM_016438;NP_057522;NT_010783;NW_001838437;NW_926839;Q9P298	D3DX57;Q9P297;Q9P298	HIGD1B	HIG1 hypoxia inducible domain family, member 1B	HIG1 domain family member 1B; CLST 11240-15 protein; HIG1 domain family, member 1B; CLST 11240 protein; protein CLST 11240	HIG1 domain family member 1B	0.6843	0.009587
51	A_72_P173981	HOOK2	AC_000062;AC_000151;NC_000019;NM_001100176;NM_013312;NP_001093646;NP_037444;NT_011295;NW_001838483;NW_927195	AAC09299;AAC09299.1;AAH12443;AAH12443.1;ABM82265;ABM84286;ABM85447;ABM87678;AC018761;AC_000062;AC_000151;AF044924;AK129729;BAC85229;BC012443;CH471106;CR590832;DB474423;DQ891339;DQ893360;DQ894521;DQ896679;EAW84305;EAW84306;NC_000019;NM_001100176;NM_013312;NP_001093646;NP_037444;NT_011295;NW_001838483;NW_927195;Q6ZP90;Q96ED9	O60562;Q96ED9	HOOK2	hook homolog 2 (Drosophila)	h-hook2; hHK2; protein Hook homolog 2	Protein Hook homolog 2	-0.5521	0.002093
52	A_72_P223727	IGFALS	AC_000059;AC_000148;NC_000016;NG_011778;NM_001146006;NM_004970;NP_001139478;NP_004961;NR_027389;NT_010393;NW_001838339;NW_926018	AAA36047;AAA36047.1;AAF06774;AAF06774.1;AAH25681;ABM82460;ABM85649;AC012180;AC_000059;AC_000148;AF192554;AK292182;AK303146;AK313198;AK315808;AL031724;BAF84871;BAF98699;BAG36014;BAG64250;BC025681;CAC36078;CAC36078.1;CH471112;DA642067;DQ891534;DQ894723;EAW85612;M86826;NC_000016;NG_011778;NM_001146006;NM_004970;NP_001139478;NP_004961;NR_027389;NT_010393;NW_001838339;NW_926018;P35858;Q8TAY0	P35858	IGFALS	insulin-like growth factor binding protein, acid labile subunit	insulin-like growth factor binding protein complex acid labile chain; insulin-like growth factor-binding protein complex acid labile subunit; OTTHUMP00000158804	Insulin-like growth factor-binding protein complex acid labile subunit	-0.7143	0.006075
53	A_72_P341523	IKAP	AC_000052;AC_000141;NC_000009;NG_008788;NM_003640;NP_003631;NT_008470;NW_001839236;NW_924539	AAC64258;AAC64258.1;AAG43369;AAG43369.1;AAH33094;AB210033;AC_000052;AC_000141;AF044195;AF153419;AK001641;AK022559;AK024223;AK123257;AK127237;AK225798;AK289962;AK304742;AL049945;AL354797;AL359692;BAE06115;BAF82651;BAF82651.1;BAG50955;BAG50955.1;BAG51092;BAG51274;BAG53883;BAG54459;BAG65501;BC033094;BF968300;BX648204;CAB43219;CAB43219.1;CAH18235;CAI39465;CAI39465.1;CAI40569;CAI40569.1;CH471105;CR749…	O95163;Q5JSV2;Q9H327;Q9UG87	IKBKAP	inhibitor of kappa light polypeptide gene enhancer in B-cells, kinase complex-associated protein	IKK complex-associated protein; elongator complex protein 1; p150; dysautonomia (Riley-Day syndrome, hereditary sensory autonomic neuropathy type III); OTTHUMP00000021869; ikappaB kinase complex-associated protein	Elongator complex protein 1	-0.4948	0.0008949
54	A_72_P165271	IKK-gamma	AC_000066;AC_000155;NC_000023;NG_009015;NG_009896;NM_001099856;NM_001099857;NM_001145255;NM_003639;NP_001093326;NP_001093327;NP_001138727;NP_003630;NT_167198;NW_001842419;NW_001842420;NW_927732	AAC36330;AAC36330.1;AAD12183;AAD12183.1;AAD38081;AAD38081.1;AAF99679;AAF99679.1;AAH00299;AAH00299.1;AAH12114;AAH12114.1;AAH46922;AAH46922.1;AAH50612;AAH50612.1;AAL27012;AAL27012.1;AAM44073;AAM44073.1;AAV38427;AAV38427.1;ABM82309;ABM85486;AC_000066;AC_000155;AF062089;AF074382;AF091453;AF261086;AF277315;AJ271718;AK000593;AK308366;AY114157;AY429546;AY429547;BC000299;BC012114;BC046922;BC050612;BT0196…	Q7LBY6;Q7Z7F1;Q9Y6K9	IKBKG	inhibitor of kappa light polypeptide gene enhancer in B-cells, kinase gamma	OTTHUMP00000212188; inhibitor of nuclear factor kappa-B kinase subunit gamma; NF-kappa-B essential modifier; IKKAP1; IKKG; I-kappa-B kinase subunit gamma; ikB kinase subunit gamma; NF-kappa-B essential modulator; IkB kinase gamma subunit; OTTHUMP00000207079; OTTHUMP00000196183; OTTHUMP00000026026; OTTHUMP00000196186; OTTHUMP00000026027; OTTHUMP00000026030; ikB kinase-associated protein 1; inconti…	NF-kappa-B essential modulator	-0.6303	0.00132
55	A_72_P225102	IL-27	AC_000062;AC_000151;NC_000019;NM_005755;NP_005746;NT_011255;NW_001838477;NW_927173	AAA93193;AAA93193.1;AAC33488;AAC33488.1;AAH15364;AAH15364.1;AAH46112;AAH46112.1;ABK41923.1;ABM82515;ABW03382;AC005578;AC_000062;AC_000151;BC015364;BC046112;CBX32665;CBX32666;CH471139;CR592116;CR592737;CR598195;CR602081;CR604910;CR606815;CR608081;CR610744;CR615391;CR615695;CR616709;CR626045;DQ891589;EAW69244;EAW69245;EAW69245.1;EF064740;EU176581;HH821931;HH821932;L08187;NC_000019;NM_005755;NP_0057…	A0N0N2;O75269;Q14213	EBI3	Epstein-Barr virus induced 3	IL35 subunit; EBV-induced gene 3 protein; epstein-Barr virus-induced gene 3 protein; Epstein-Barr virus induced gene 3; IL27 subunit; interleukin-27 subunit beta; cytokine receptor; IL-27 subunit beta		0.5268	0.003114
56	A_72_P225102	IL-35	AC_000062;AC_000151;NC_000019;NM_005755;NP_005746;NT_011255;NW_001838477;NW_927173	AAA93193;AAA93193.1;AAC33488;AAC33488.1;AAH15364;AAH15364.1;AAH46112;AAH46112.1;ABK41923.1;ABM82515;ABW03382;AC005578;AC_000062;AC_000151;BC015364;BC046112;CBX32665;CBX32666;CH471139;CR592116;CR592737;CR598195;CR602081;CR604910;CR606815;CR608081;CR610744;CR615391;CR615695;CR616709;CR626045;DQ891589;EAW69244;EAW69245;EAW69245.1;EF064740;EU176581;HH821931;HH821932;L08187;NC_000019;NM_005755;NP_0057…	A0N0N2;O75269;Q14213	EBI3	Epstein-Barr virus induced 3	IL35 subunit; EBV-induced gene 3 protein; epstein-Barr virus-induced gene 3 protein; Epstein-Barr virus induced gene 3; IL27 subunit; interleukin-27 subunit beta; cytokine receptor; IL-27 subunit beta		0.5268	0.003114
57	A_72_P288154	ITIH2	AC_000053;AC_000142;NC_000010;NM_002216;NP_002207;NT_008705;NW_001837931;NW_924584	AA406494;AAA59195;AAA59195.1;AAA60558;AAA60558.1;AAI32686;AC_000053;AC_000142;AK225277;AK225329;AK291379;AK297334;AL158044;BAF84068;BAG59791;BC132685;BG617651;CAA30160;CAA30160.1;CAI12956;CAI12957;CAI12957.1;CAI12958;CB154170;CH471072;CR624216;EAW86376;EAW86377;EAW86378;M18193;M33033;NC_000010;NM_002216;NP_002207;NT_008705;NW_001837931;NW_924584;P19823;Q5T985;X07173	P19823;Q14659;Q15484;Q5T986	ITIH2	inter-alpha (globulin) inhibitor H2	serum-derived hyaluronan-associated protein; inter-alpha (globulin) inhibitor, H2 polypeptide; ITI-HC2; inter-alpha-trypsin inhibitor heavy chain H2; inter-alpha-trypsin inhibitor complex component II; OTTHUMP00000019058; ITI heavy chain H2; inter-alpha-inhibitor heavy chain 2; OTTHUMP00000019059	Inter-alpha-trypsin inhibitor heavy chain H2	-0.4345	0.008255
58	A_72_P069846	KAD6	AC_000048;AC_000137;NC_000005;NM_001015891;NM_001015892;NM_003187;NM_016283;NP_001015891;NP_001015892;NP_003178;NP_057367;NT_006713;NW_001838935;NW_003315917;NW_922618	AAA84389;AAA84389.1;AAA91318;AAA91318.1;AAC50153;AAC50153.1;AAD34132;AAD34132.1;AAF14860;AAF14860.1;AAH03400;AAH03400.1;AAH07349;AAH07349.1;AAH07426;AAH07426.1;AAH33320;AAH33320.1;AAN84793;AAN84793.1;AAV38458;AAV38458.1;AC145132;AC145145;ACE86721;ACE87407;AC_000048;AC_000137;AF110777;AF151895;AI879232;AJ878880;AJ878881;AY189986;BC003400;BC007349;BC007426;BC033320;BG490028;BG720149;BT019652;BX1178…	A8MSZ6;D3DWA3;Q16594;Q5F2S9;Q5U0D1;Q9BTS1;Q9Y3D8	TAF9	TAF9 RNA polymerase II, TATA box binding protein (TBP)-associated factor, 32kDa	coilin-interacting nuclear ATPase protein; transcription initiation factor TFIID subunit 9; adenylate kinase isoenzyme 6; RNA polymerase II TBP-associated factor subunit G; TAFII-32; TAFII-31; STAF31/32; TATA box binding protein (TBP)-associated factor, RNA polymerase II, G, 32kD; coilin interacting protein; OTTHUMP00000125196; transcription initiation factor TFIID 31 kD subunit; OTTHUMP000002221…	Adenylate kinase isoenzyme 6	-0.7237	0.003393
59	A_72_P163756	KCNK1	AC_000044;AC_000133;NC_000001;NM_002245;NP_002236;NT_167186;NW_001838549;NW_927128	AAB01688;AAB01688.1;AAB51147;AAB51147.1;AAB97878;AAB97878.1;AAH18051;AAH18051.1;ABM83309;ABM86521;AC_000044;AC_000133;AK090902;AK314016;AL356357;BAG36727;BC018051;BQ022191;CAI21792;CAI21792.1;CAI21793;CAI21794;CH471098;CR590911;DQ892383;DQ895595;EAW69989;EAW69989.1;EAW69990;NC_000001;NM_002245;NP_002236;NT_167186;NW_001838549;NW_927128;O00180;Q5T5E7;U33632;U76996;U90065	O00180;Q13307;Q5T5E8	KCNK1	potassium channel, subfamily K, member 1	potassium channel KCNO1; inward rectifying potassium channel protein TWIK-1; potassium channel subfamily K member 1; OTTHUMP00000036029; potassium inwardly-rectifying channel, subfamily K, member 1	Potassium channel subfamily K member 1	0.4761	0.004093
60	A_72_P257417	KIAA1604	AC_000045;AC_000134;NC_000002;NM_020943;NP_065994;NT_005403;NW_001838863;NW_921585	AAH16651;AAH16651.1;AAH31216;AAH31216.1;AAH53573;AAH53573.1;AAH57826;AAH57826.1;AAH93952;AAH93952.1;AAH93954;AAH93954.1;AB046824;AC068194;AC096587;AC_000045;AC_000134;AK025635;AK026978;AK123647;BAB13430;BAB13430.1;BAB15197;BAB15197.1;BAB15612;BAB15612.1;BC016651;BC031216;BC041662;BC053573;BC057826;BC093952;BC093954;BC143433;BF699499;CH471058;CR616945;EAX10996;EAX10997;EAX10998;NC_000002;NM_020943…	Q05DC2;Q4G135;Q52LF0;Q6PEX2;Q7Z6I0;Q9H5L3;Q9H6Q6;Q9HCG8	CWC22	CWC22 spliceosome-associated protein homolog (S. cerevisiae)	functional spliceosome-associated protein b; pre-mRNA-splicing factor CWC22 homolog; nucampholin homolog; OTTHUMP00000205375; OTTHUMP00000205374	Pre-mRNA-splicing factor CWC22 homolog	0.3234	0.00548
61	A_72_P172576	KIAA1712	AC_000047;AC_000136;NC_000004;NM_001040157;NM_001145314;NP_001035247;NP_001138786;NT_016354;NW_001838921;NW_922217	AAH38667;AAH38667.1;AAR88428;AAR88428.1;AB051499;AC097653;AC116616;AC_000047;AC_000136;AK094961;AK292484;AL699124;AY426674;BAB21803;BAB21803.1;BAF85173;BAF85173.1;BAG52965;BAG52965.1;BC038667;BC045590;CH471056;DA347369;DB211405;EAX04738;EAX04738.1;EAX04739;EAX04739.1;EAX04740;EAX04740.1;NC_000004;NM_001040157;NM_001145314;NP_001035247;NP_001138786;NT_016354;NW_001838921;NW_922217;Q9C0F1	A8K8W9;A8MW11;B3KT53;D3DP42;Q8IXZ4;Q9C0F1	CEP44	centrosomal protein 44kDa	OTTHUMP00000218896; OTTHUMP00000218897; centrosomal protein of 44 kDa; OTTHUMP00000218898; KIAA1712; HBV PreS1-transactivated protein 3	Centrosomal protein of 44 kDa	-0.4517	0.00339
62	A_72_P223552	LIPS	AC_000062;AC_000151;NC_000019;NM_005357;NP_005348;NT_011109;NW_001838496;NW_927217	AAA69810;AAA69810.1;AAC50666;AAC50666.1;AAH70041;AAH70041.1;ABA03168;ABA03168.1;AC011497;AC_000062;AC_000151;AK292482;BAF85171;BC029301;BC029961;BC070041;CH471126;CR592561;DQ188033;EAW57135;L11706;NC_000019;NM_005357;NP_005348;NT_011109;NW_001838496;NW_927217;Q05469;U40001;U40002	Q05469;Q3LRT2;Q6NSL7	LIPE	lipase, hormone-sensitive	hormone-sensitive lipase; hormone-sensitive lipase testicular isoform	Hormone-sensitive lipase	0.4204	0.002651
63	A_72_P406683	LPA3 receptor	AC_000044;AC_000133;NC_000001;NM_012152;NP_036284;NT_032977;NW_001838589;NW_921795	AAD56311;AAD56311.1;AAF00530;AAF00530.1;AAF91291;AAI26269;AAI26269.1;AAI26271;AAI26271.1;AAP84360;AAP84360.1;AC104169;AC_000044;AC_000133;AF127138;AF186380;AF236117;AK308283;AL139150;AY322547;BC126268;BC126270;BC144021;BU633960;CH471097;EAW73222;NC_000001;NM_012152;NP_036284;NT_032977;NW_001838589;NW_921795;Q9NRB8;Q9UBY5	A0AVA3;Q9UBY5	LPAR3	lysophosphatidic acid receptor 3	calcium-mobilizing lysophosphatidic acid receptor LP-A3; LPA receptor EDG7; LPA-3; endothelial cell differentiation gene 7; endothelial differentiation, lysophosphatidic acid G-protein-coupled receptor, 7; LPA receptor 3; lysophosphatidic acid receptor Edg-7	Lysophosphatidic acid receptor 3	-0.2583	0.006194
64	A_72_P227562	MARCH6	AC_000048;AC_000137;NC_000005;NM_005885;NP_005876;NT_006576;NW_001838927;NW_922518	AAB66840;AAB66840.1;AAH46148;AAH46148.1;AAI36462;AAI36462.1;AAI36463;AAI36463.1;AAI42680;AAI42680.1;AAI42695;AAI42695.1;AB011169;AC012640;AC092336;AC_000048;AC_000137;AF009301;AK000970;AK296585;AK299339;AK300034;AK314686;BAA25523;BAA25523.1;BAG37238;BAG50840;BAG59204;BAG61341;BAG61845;BC013761;BC039293;BC046148;BC111494;BC136461;BC136462;BC142679;BC142694;CAH05341;CH471102;CQ834252;CR603299;EAX08…	A5PKZ4;D3DTC8;O14670;O60337;Q86X77	MARCH6	membrane-associated ring finger (C3HC4) 6	protein TEB-4; membrane-associated RING finger protein 6; E3 ubiquitin-protein ligase MARCH6; RING finger protein 176; doa10 homolog; OTTHUMP00000221094; OTTHUMP00000221092; OTTHUMP00000221093; membrane-associated RING-CH protein VI	E3 ubiquitin-protein ligase MARCH6	-0.2196	0.008418
65	A_72_P058151	MATP	AC_000048;AC_000137;NC_000005;NG_011691;NM_001012509;NM_016180;NP_001012527;NP_057264;NT_006576;NW_001838929;NW_922562	AAD51812;AAD51812.1;AAH03597;AAH03597.1;AAH64405;AAH64405.1;AC139777;AC139783;AC_000048;AC_000137;ADQ32605;AF172849;BC003597;BC064405;BQ677785;BU166522;CH471118;EAX10811;EAX10812;EAX10813;EAX10814;HQ448124;NC_000005;NG_011691;NM_001012509;NM_016180;NP_001012527;NP_057264;NT_006576;NW_001838929;NW_922562;Q9UMX9	Q6P2P0;Q9BTM3;Q9UMX9	SLC45A2	solute carrier family 45, member 2	underwhite; OTTHUMP00000155209; protein AIM-1; OTTHUMP00000221214; OTTHUMP00000221215; OTTHUMP00000115892; melanoma antigen AIM1; membrane-associated transporter protein; membrane associated transporter	Membrane-associated transporter protein	-1.398	0.00517
66	A_72_P146471	MGP	AC_000055;AC_000144;NC_000012;NG_023331;NM_000900;NM_001190839;NP_000891;NP_001177768;NT_009714;NW_001838052;NW_925328	AAB53765;AAB53765.1;AAB53766;AAB53766.1;AAH05272;AAH05272.1;AAH70314;AAH70314.1;AAH93078;AAH93078.1;AAP35379;AAP35379.1;AAT08173;AAT08173.1;AAY16978;AAY16978.1;ABM83421;ABM86633;AC007655;AC_000055;AC_000144;AK312029;AW997681;AY542304;BAG34966;BAG34966.1;BC005272;BC070314;BC093078;BF699158;BT006733;CAA30287;CAA30287.1;CAA37418;CAA37418.1;CAG29354;CAG29354.1;CB069816;CB108937;CH471094;CR450358;CR62…	A0M8W5;B2R519;P08493;Q2TU41;Q567P9;Q6ICN5	MGP	matrix Gla protein	cell growth-inhibiting gene 36 protein; OTTHUMP00000239335; OTTHUMP00000239337	Matrix Gla protein	0.5374	0.009182
67	A_72_P203252	NOSTRIN	AC_000045;AC_000134;NC_000002;NM_001039724;NM_001171631;NM_001171632;NM_052946;NP_001034813;NP_001165102;NP_001165103;NP_443178;NT_005403;NW_001838860;NW_003315909;NW_921585	AAH14189;AAH14189.1;AAH93072;AAH93072.1;AAX93055;AAY24097;AAY24097.1;ABD62889;ABD62889.1;ABM83597;ABM87125;AC009475;AC069137;AC208170;AC_000045;AC_000134;AJ532842;AK002203;AK093444;AK123698;AK290254;AL550371;BAE46614;BAE46614.1;BAF82943;BAF82943.1;BAG52717;BC014189;BC093072;BF114987;BP334580;BQ899074;CAD58724;CAD58724.1;CH471058;CR607601;CR609846;DQ402497;DQ892671;DQ896126;DW437437;EAX11292;EAX11…	A8K2I9;Q27HG3;Q53S62;Q8IVI9;Q96CJ9	NOSTRIN	nitric oxide synthase trafficker	OTTHUMP00000204805; nitric oxide synthase trafficking; ortholog of mouse disabled 2 interacting proein 2; BM247 homolog; OTTHUMP00000204806; nitric oxide synthase traffic inducer; ENOS traffic inducer; nostrin; OTTHUMP00000204850; OTTHUMP00000204851; OTTHUMP00000207342; endothelial nitric oxide synthase traffic inducer; eNOS-trafficking inducer; OTTHUMP00000207343	Nostrin	0.2651	0.00365
68	A_72_P305784	NPY	AC_000050;AC_000068;AC_000139;NC_000007;NG_016148;NM_000905;NP_000896;NT_007819;NT_079592;NW_001839003;NW_923240	AAA59944;AAA59944.1;AAA59945;AAA59945.1;AAA59946;AAA59946.1;AAH29497;AAH29497.1;AAQ96843;AAQ96843.1;ABM84261;ABM87650;AC004485;AC_000050;AC_000068;AC_000139;AI198311;AK312156;BAG35090;BC029497;CH236948;CH471073;DQ893335;DQ896651;EAL24248;EAW93807;K01911;M14295;M14296;M14297;M14298;M15789;NC_000007;NG_016148;NM_000905;NP_000896;NT_007819;NT_079592;NW_001839003;NW_923240;P01303	P01303	NPY	neuropeptide Y	pro-neuropeptide Y; OTTHUMP00000201946; OTTHUMP00000201947; OTTHUMP00000122447	Pro-neuropeptide Y	-0.2213	0.0003523
69	A_72_P413728	Neurolysin	AC_000048;AC_000137;NC_000005;NM_020726;NP_065777;NT_006713;NW_001838935;NW_922618	AAH01644;AAH04985;AB033052;AB463138;AC008958;AC016643;AC_000048;AC_000137;AJ300837;AK026655;AK027602;AK096416;AK292803;AL834241;BAA86540;BAA86540.2;BAB55224;BAF85492;BAG53285;BAG72651;BC001644;BC004985;CA441264;CAC27329;CAC27329.1;CAD38918;CB992921;CH471137;CR613085;CR620384;EAW51338;EAW51339;EAW51340;NC_000005;NM_020726;NP_065777;NT_006713;NW_001838935;NW_922618;Q8NDD9;Q96K48;Q9BQD0;Q9BYT8	Q9BYT8;Q9ULJ4	NLN	neurolysin (metallopeptidase M3 family)	OTTHUMP00000222651; endopeptidase 24.16; angiotensin-binding protein; neurolysin, mitochondrial; angiotensin binding protein; microsomal endopeptidase; mitochondrial oligopeptidase M; neurotensin endopeptidase; OTTHUMP00000123454	Neurolysin, mitochondrial	-0.573	0.006504
70	A_72_P348703	Nidogen	AC_000044;AC_000133;NC_000001;NM_002508;NP_002499;NT_167186;NW_001838549;NW_927128	AAA57261;AAA57261.1;AAA59932;AAA59932.1;AAH45606;AAH45606.1;AB209448;AC_000044;AC_000133;AK297234;AL122018;AL139161;BAD92685;BAD92685.1;BAG59717;BC012501;BC045606;BQ549657;CAA57709;CAA57709.1;CAI22680;CAI22680.1;CAI22681;CAI22681.1;CAI23421;CAI23421.1;CAI23422;CAI23422.1;CH471098;CN267119;CR590230;CR609449;CR611614;DA269707;DN999415;EAW70039;EAW70040;EAW70041;M27445;M30269;NC_000001;NM_002508;NP_…	P14543;Q14942;Q59FL2;Q5TAF2;Q5TAF3;Q86XD7	NID1	nidogen 1	entactin; nidogen (enactin); enactin; OTTHUMP00000038291; OTTHUMP00000037970; NID-1; nidogen-1	Nidogen-1	-1.175	0.001635
71	A_72_P069846	PCAF histone acetylase complex	AC_000048;AC_000137;NC_000005;NM_001015891;NM_001015892;NM_003187;NM_016283;NP_001015891;NP_001015892;NP_003178;NP_057367;NT_006713;NW_001838935;NW_003315917;NW_922618	AAA84389;AAA84389.1;AAA91318;AAA91318.1;AAC50153;AAC50153.1;AAD34132;AAD34132.1;AAF14860;AAF14860.1;AAH03400;AAH03400.1;AAH07349;AAH07349.1;AAH07426;AAH07426.1;AAH33320;AAH33320.1;AAN84793;AAN84793.1;AAV38458;AAV38458.1;AC145132;AC145145;ACE86721;ACE87407;AC_000048;AC_000137;AF110777;AF151895;AI879232;AJ878880;AJ878881;AY189986;BC003400;BC007349;BC007426;BC033320;BG490028;BG720149;BT019652;BX1178…	A8MSZ6;D3DWA3;Q16594;Q5F2S9;Q5U0D1;Q9BTS1;Q9Y3D8	TAF9	TAF9 RNA polymerase II, TATA box binding protein (TBP)-associated factor, 32kDa	coilin-interacting nuclear ATPase protein; transcription initiation factor TFIID subunit 9; adenylate kinase isoenzyme 6; RNA polymerase II TBP-associated factor subunit G; TAFII-32; TAFII-31; STAF31/32; TATA box binding protein (TBP)-associated factor, RNA polymerase II, G, 32kD; coilin interacting protein; OTTHUMP00000125196; transcription initiation factor TFIID 31 kD subunit; OTTHUMP000002221…		-0.7237	0.003393
72	A_72_P127436	PCBP-2	AC_000055;AC_000144;NC_000012;NM_001098620;NM_001128911;NM_001128912;NM_001128913;NM_001128914;NM_005016;NM_031989;NP_001092090;NP_001122383;NP_001122384;NP_001122385;NP_001122386;NP_005007;NP_114366;NT_029419;NW_001838059;NW_925395	AAH01155;AAH01155.1;AAH71942;AAI07689;AB188306;AB208825;AC023509;AC068889;AC_000055;AC_000144;AK023529;AK123458;AK130583;AK225357;AK292141;AK299210;AK302067;BAD36897;BAD92062;BAF84830;BAG61249;BAG63457;BC001155;BC035420;BC071942;BC107688;BE748080;BF509278;BM764315;BU844465;CAA55015;CAA55015.1;CAJ42709;CH471054;CR590150;CR602496;CR603638;CR606382;CR620547;CS185528;CX164318;EAW96706;EAW96707;EAW967…	Q15366;Q6PKG5	PCBP2	poly(rC) binding protein 2	alpha-CP2; poly(rC)-binding protein 2; heterogeneous nuclear ribonucleoprotein E2; hnRNP E2; heterogenous nuclear ribonucleoprotein E2	Poly(rC)-binding protein 2	0.3109	0.005733
73	A_72_P196747	PCC	AC_000046;AC_000135;NC_000003;NG_008939;NM_000532;NM_001178014;NP_000523;NP_001171485;NT_005612;NW_001838884;NW_921807	AAA60036;AAA60036.1;AAA60037;AAA60037.1;AAA60038;AAA60038.1;AAB28900;AAB28900.1;AAG17227;AAH13768;AAH13768.1;AAH18013;AAH53661;AAH53661.1;AB209009;AC069524;AC_000046;AC_000135;ADZ15494;AF217984;AI191766;AJ006487;AJ006488;AJ006489;AJ006490;AJ006491;AJ006492;AJ006493;AJ006494;AJ006495;AJ006496;AJ006497;AJ006498;AJ006499;AK130359;AK225215;AK225733;AK295312;AK302522;AK303079;AL831978;AY399219;BAD9224…	P05166;Q16813;Q96CX0	PCCB	propionyl CoA carboxylase, beta polypeptide	PCCase subunit beta; propanoyl-CoA:carbon dioxide ligase subunit beta; OTTHUMP00000216508; OTTHUMP00000216510; OTTHUMP00000216511; OTTHUMP00000216514; OTTHUMP00000216513; OTTHUMP00000216507; OTTHUMP00000216512; OTTHUMP00000216506; OTTHUMP00000216522; propionyl-CoA carboxylase beta chain, mitochondrial; propionyl Coenzyme A carboxylase, beta polypeptide; OTTHUMP00000216515		-0.6919	0.006971
74	A_72_P196747	PCCB	AC_000046;AC_000135;NC_000003;NG_008939;NM_000532;NM_001178014;NP_000523;NP_001171485;NT_005612;NW_001838884;NW_921807	AAA60036;AAA60036.1;AAA60037;AAA60037.1;AAA60038;AAA60038.1;AAB28900;AAB28900.1;AAG17227;AAH13768;AAH13768.1;AAH18013;AAH53661;AAH53661.1;AB209009;AC069524;AC_000046;AC_000135;ADZ15494;AF217984;AI191766;AJ006487;AJ006488;AJ006489;AJ006490;AJ006491;AJ006492;AJ006493;AJ006494;AJ006495;AJ006496;AJ006497;AJ006498;AJ006499;AK130359;AK225215;AK225733;AK295312;AK302522;AK303079;AL831978;AY399219;BAD9224…	P05166;Q16813;Q96CX0	PCCB	propionyl CoA carboxylase, beta polypeptide	PCCase subunit beta; propanoyl-CoA:carbon dioxide ligase subunit beta; OTTHUMP00000216508; OTTHUMP00000216510; OTTHUMP00000216511; OTTHUMP00000216514; OTTHUMP00000216513; OTTHUMP00000216507; OTTHUMP00000216512; OTTHUMP00000216506; OTTHUMP00000216522; propionyl-CoA carboxylase beta chain, mitochondrial; propionyl Coenzyme A carboxylase, beta polypeptide; OTTHUMP00000216515	Propionyl-CoA carboxylase beta chain, mitochondrial	-0.6919	0.006971
75	A_72_P048771	PEAR1	AC_000044;AC_000133;NC_000001;NM_001080471;NP_001073940;NT_004487;NW_001838531;NW_925683	AAI72296;AC_000044;AC_000133;AK074121;AK098809;AL158169;AL356104;BAB84947;BAB84947.1;BAC05419;BC172296;CAH70011;CAH70011.1;CAH72941;CAH72941.1;CAO03619;CR599082;CR609390;NC_000001;NM_001080471;NP_001073940;NT_004487;NW_001838531;NW_925683;Q5VY43;Q8N780	Q5VY43;Q8TEK2	PEAR1	platelet endothelial aggregation receptor 1	multiple epidermal growth factor-like domains protein 12; OTTHUMP00000038718; multiple EGF-like-domains 12; multiple EGF-like domains protein 12; hPEAR1	Platelet endothelial aggregation receptor 1	0.4528	0.003659
76	A_72_P180661	PGE2R2	AC_000057;AC_000146;NC_000014;NG_013082;NM_000956;NP_000947;NT_026437;NW_001838111;NW_925539	AAA61681;AAA61681.1;AAD44177;AAD44177.1;AAH93927;AAH93927.1;AAH93929;AAH93929.1;AAP32303;AAP32303.1;ABD48958;ABD48958.1;AC_000057;AC_000146;AF134201;AF134202;AL365475;AY275471;BC093927;BC093929;BE739744;BF029797;BM986745;BQ014559;CAA58749;CAA58749.1;CF132756;CH471078;CN484094;CR977661;DQ398948;EAW65652;EAW65652.1;EAW65653;EAW65654;EAW65654.1;NC_000014;NG_013082;NM_000956;NP_000947;NT_026437;NW_00…	D3DSC0;P43116;Q52LG8	PTGER2	prostaglandin E receptor 2 (subtype EP2), 53kDa	PGE2 receptor EP2 subtype; PGE receptor EP2 subtype; prostanoid EP2 receptor; prostaglandin E receptor 2 (subtype EP2), 53kD; OTTHUMP00000178987; prostaglandin E2 receptor EP2 subtype	Prostaglandin E2 receptor EP2 subtype	-0.2376	0.001914
77	A_72_P127346	PGMU	AC_000044;AC_000133;NC_000001;NG_016966;NM_001172818;NM_001172819;NM_002633;NP_001166289;NP_001166290;NP_002624;NT_032977;NW_001838579;NW_921351	AAA60080;AAA60080.1;AAB29177;AAB29177.2;AAB29178;AAH01756;AAH01756.3;AAH19920;AAH19920.1;AAH67763;AAH67763.2;AAH90856;AAH90856.1;AAP35607;AAP35607.1;ABM84712;ABM92235;AC_000044;AC_000133;AJ243265;AK293298;AK294186;AK298505;AK300100;AK312254;AL109925;BAG35186;BAG35186.1;BAG56819;BAG57502;BAG60712;BAH13208;BC001756;BC019920;BC067763;BC090856;BT006961;CAB92085;CAB92085.1;CAB92086;CAB92086.1;CAC19809…	B2R5N9;P36871;Q16105;Q5BKZ9;Q6NW22;Q86U74;Q96J40;Q9NTY4	PGM1	phosphoglucomutase 1	glucose phosphomutase 1; phosphoglucomutase-1; PGM 1; OTTHUMP00000010519; OTTHUMP00000010520	Phosphoglucomutase-1	-1.004	0.008135
78	A_72_P107711	PON2	AC_000050;AC_000068;AC_000139;NC_000007;NG_008725;NM_000305;NM_001018161;NP_000296;NP_001018171;NT_007933;NT_079595;NW_001839064;NW_923574	AAC27944;AAC27944.1;AAC27945;AAC27945.1;AAC27946;AAC27946.1;AAC41995;AAC41995.1;AAC62431;AAC62431.1;AAH09728;AAH40010;AAH40010.1;AAH46160;AAO18083;AAO18083.1;AB102891;AC004012;AC005021;AC_000050;AC_000068;AC_000139;AF001601;AF001602;AF001603;AK291103;AK296029;AK296636;AK301313;AK308065;AK315209;AY210982;BAD89420;BAD89420.1;BAF83792;BAG37646;BAG37646.1;BAG58797;BAG58797.1;BAG59238;BAG62864;BC00972…	B2RCP9;B4DJD5;O15114;O15115;O75856;Q15165;Q5FBX7;Q86YL0	PON2	paraoxonase 2	PON 2; A-esterase 2; OTTHUMP00000204704; OTTHUMP00000204705; serum paraoxonase/arylesterase 2; OTTHUMP00000204703; serum aryldialkylphosphatase 2; paraoxonase nirs; aromatic esterase 2	Serum paraoxonase/arylesterase 2	-0.6129	0.008134
79	A_72_P321423	PROX1	AC_000044;AC_000133;NC_000001;NM_002763;NP_002754;NT_167186;NW_001838537;NW_926794	AAC50656;AAC50656.1;AAH24201;AAH24201.1;ABZ92390;AC011700;AC_000044;AC_000133;AK290176;AK298182;AL606537;BAF82865.1;BAG60453;BC024201;CAI15309;CAI15309.1;CH471100;EAW93359;EAW93360;EAW93360.1;EU446861;NC_000001;NM_002763;NP_002754;NT_167186;NW_001838537;NW_926794;Q92786;U44060	A6NK29;A8K2B1;Q5SW76;Q8TB91;Q92786	PROX1	prospero homeobox 1	prospero homeobox protein 1; homeobox prospero-like protein PROX1; PROX-1; prospero-related homeobox 1; OTTHUMP00000035023; OTTHUMP00000216821	Prospero homeobox protein 1	0.8822	0.003424
80	A_72_P203277	PRSS11 (HtrA1)	AC_000053;AC_000142;NC_000010;NG_011554;NM_002775;NP_002766;NT_030059;NW_001838006;NW_924884	AAC97211;AAC97211.1;AAD41525;AAD41525.1;AAH11352;AAI56553;AAI72536;AC_000053;AC_000142;AF070555;AF097709;AF157623;AI423369;AK091944;AK092476;AK290089;BAA13322;BAF82778;BAG52446;BAG52557;BC011352;BC031082;BC156552;BC172536;BM993893;BX842242;CAA69226;CAA69226.1;CH471066;CR590731;CR593682;CR596858;CR597732;CR603877;CR605013;CR611805;CR613636;CR623030;CR624458;CR624921;D87258;DA633502;EAW49312;EAW493…	D3DRE4;Q92743;Q9UNS5	HTRA1	HtrA serine peptidase 1	OTTHUMP00000020664; serine protease HTRA1; high-temperature requirement A serine peptidase 1; IGFBP5-protease; OTTHUMP00000063514; protease, serine, 11 (IGF binding)	Serine protease HTRA1	0.5534	0.002239
81	A_72_P325783	Probable G-protein coupled receptor 116 precursor	AC_000049;AC_000138;NC_000006;NM_001098518;NM_015234;NP_001091988;NP_056049;NT_007592;NW_001838981;NW_923073	AAH50087;AAH66121;AAH66121.1;AAN46672;AAN46672.1;AAO85064;AAO85064.1;AAS21061;AAS21061.1;AB018301;AB031421;ACE86978;ACE87667;AC_000049;AC_000138;AI796309;AK075121;AK092043;AK289503;AK296948;AK300380;AL050295;AL096772;AL832125;AM393514;AY140958;AY255552;AY498875;BAA34478;BAA34478.2;BAD83582;BAF82192;BAG59494;BAG62115;BC036002;BC050087;BC066121;CAB43394;CAB43394.1;CAB61578;CAB61578.1;CAL38391;CH471…	O94858;Q5TF06;Q6RGN2;Q86SP0;Q8IZF2;Q9Y3Z2	GPR116	G protein-coupled receptor 116	OTTHUMP00000016557; probable G-protein coupled receptor 116; Ig-Hepta homolog	Probable G-protein coupled receptor 116	0.3013	0.0002699
82	A_72_P135736	RDH16	AC_000055;AC_000144;NC_000012;NM_003708;NP_003699;NT_029419;NW_001838059;NW_925395	AAC39922;AAC39922.1;AAC72923;AAC72923.1;AAI60081;AB209332;ABF51671;AC026120;AC_000055;AC_000144;AF057034;AF086735;AW449664;BAD92569;BC160081;CH471054;DQ499468;EAW96968;NC_000012;NM_003708;NP_003699;NT_029419;NW_001838059;NW_925395;O75452;Q1HDS8;Q59FX7	O75452;Q9UNV2	RDH16	retinol dehydrogenase 16 (all-trans)	short chain dehydrogenase/reductase family 9C, member 8; retinol dehydrogenase 16 (all-trans and 13-cis); sterol/retinol dehydrogenase; retinol dehydrogenase 16; microsomal NAD+-dependent retinol dehydrogenase 4	Retinol dehydrogenase 16	-1.015	0.001347
83	A_72_P063466	RGL	AC_000049;AC_000138;NC_000006;NG_009876;NM_004761;NP_004752;NR_028387;NT_007592;NT_113891;NT_167245;NT_167247;NT_167248;NW_001838980;NW_923073	AAC50818;AAH00316;AAH05037;AAH32681;AAH32681.1;AAH40989;AB012295;AC_000049;AC_000138;AK095967;AK294442;AL050259;AL662820;AL662827;BAA36193;BAA75926;BAA75926.1;BAG57683;BC000316;BC005037;BC032681;BC040989;BX000343;BX248088;BX648015;CAB09992;CAB09992.1;CAB43361;CAB43361.1;CAC88186;CAI17521;CAI17521.1;CAI18118;CAI18118.1;CAI41832;CAI41832.1;CAM25470;CAQ08027;CAQ08027.1;CAQ08257;CAQ08257.1;CH471081;C…	O15211;Q5STK0;Q9Y3F3	RGL2	ral guanine nucleotide dissociation stimulator-like 2	ras-associated protein RAB2L; RAB2, member RAS oncogene family-like; GDS-related protein; ralGDS-like factor; ralGDS-like 2; OTTHUMP00000029085		0.3082	0.004623
84	A_72_P063466	RGL2	AC_000049;AC_000138;NC_000006;NG_009876;NM_004761;NP_004752;NR_028387;NT_007592;NT_113891;NT_167245;NT_167247;NT_167248;NW_001838980;NW_923073	AAC50818;AAH00316;AAH05037;AAH32681;AAH32681.1;AAH40989;AB012295;AC_000049;AC_000138;AK095967;AK294442;AL050259;AL662820;AL662827;BAA36193;BAA75926;BAA75926.1;BAG57683;BC000316;BC005037;BC032681;BC040989;BX000343;BX248088;BX648015;CAB09992;CAB09992.1;CAB43361;CAB43361.1;CAC88186;CAI17521;CAI17521.1;CAI18118;CAI18118.1;CAI41832;CAI41832.1;CAM25470;CAQ08027;CAQ08027.1;CAQ08257;CAQ08257.1;CH471081;C…	O15211;Q5STK0;Q9Y3F3	RGL2	ral guanine nucleotide dissociation stimulator-like 2	ras-associated protein RAB2L; RAB2, member RAS oncogene family-like; GDS-related protein; ralGDS-like factor; ralGDS-like 2; OTTHUMP00000029085	Ral guanine nucleotide dissociation stimulator-like 2	0.3082	0.004623
85	A_72_P290969	Ro60	AC_000044;AC_000133;NC_000001;NM_001042369;NM_001042370;NM_001173524;NM_001173525;NM_004600;NP_001035828;NP_001035829;NP_001166995;NP_001166996;NP_004591;NR_033393;NT_004487;NW_001838533;NW_926128	AAA35493;AAA35493.1;AAA35532;AAA35532.1;AAB81552;AAB81552.1;AAB81553;AAB81553.1;AAH36658;AAH36658.1;AAO47001;AAO47002;ABM82452;ABM85642;AC_000044;AC_000133;AI433657;AK314594;AL136370;AY205314;AY205315;BAG37166;BAG37166.1;BC036658;BI560207;BQ227323;BX394323;CAC17589;CAC17589.1;CAI10822;CAI10823;CAI10824;CAI10825;CH471067;CR592331;CR616562;CR936683;CX761715;DA518443;DQ891526;DQ894716;EAW91239;EAW91…	B2RBB9;P10155;Q92787;Q9H1W6	TROVE2	TROVE domain family, member 2	Sjogren syndrome antigen A2 (60kD, ribonucleoprotein autoantigen SS-A/Ro); OTTHUMP00000033764; 60 kDa ribonucleoprotein Ro; sjoegren syndrome type A antigen; 60 kDa SS-A/Ro ribonucleoprotein; OTTHUMP00000033760; OTTHUMP00000033762; OTTHUMP00000033761; Sjogren syndrome antigen A2 (60kDa, ribonucleoprotein autoantigen SS-A/Ro); OTTHUMP00000033763; OTTHUMP00000033759; gastric cancer multi-drug resis…	60 kDa SS-A/Ro ribonucleoprotein	1.166	0.00698
86	A_72_P136851;A_72_P213162	SERPINA3 (ACT)	AC_000057;AC_000146;NC_000014;NG_012879;NM_001085;NP_001076;NT_026437;NW_001838113;NW_925561	AAA51543;AAA51543.1;AAA51559;AAA51559.1;AAA51560;AAA51560.1;AAD08810;AAD08810.1;AAH03559;AAH03559.3;AAH10530;AAH10530.1;AAH13189;AAH13189.1;AAH34554;AAH34554.1;AAH70265;AAH70265.1;AAT08028;AAT08028.1;AAT08029;AAT08029.1;AB209060;AC_000057;AC_000146;ADQ32760;AF089747;AK093049;AK096120;AK123091;AL049839;AY513275;AY513276;BAD92297;BAD92297.1;BAG52641;BAG53869;BAG53869.1;BC003559;BC010530;BC013189;BC…	B3KVQ7;P01011;Q13703;Q2TU87;Q2TU88;Q59GP9;Q6LBY8;Q6LDT7;Q6NSC9;Q8N177;Q96DW8;Q9UC47;Q9UNU9	SERPINA3	serpin peptidase inhibitor, clade A (alpha-1 antiproteinase, antitrypsin), member 3	serine (or cysteine) proteinase inhibitor, clade A, member 3; cell growth-inhibiting gene 24/25 protein; serpin A3; serine (or cysteine) proteinase inhibitor, clade A (alpha-1 antiproteinase, antitrypsin), member 3; OTTHUMP00000028439; growth-inhibiting protein 24; growth-inhibiting protein 25; alpha-1-antichymotrypsin	Alpha-1-antichymotrypsin	-0.6215	0.006633
87	A_72_P250527	SLC27A3	AC_000044;AC_000133;NC_000001;NM_024330;NP_077306;NT_004487;NW_001838529;NW_003315905;NW_925683	AAH03041;AAH03041.1;AAH03654;AAH03654.2;AAH09916;AAH09916.1;AAH29792;AAH29792.1;AAQ88775;AAQ88775.1;ABM84355;ABM86877;AC_000044;AC_000133;AJ577572;AK027499;AK074134;AK075377;AK123997;AK125102;AL513523;AY358409;BAB55156;BAB55156.1;BAB84960;BAB84960.1;BAC11578;BAC11578.1;BAC86050;BAC86050.1;BC003041;BC003654;BC009916;BC029792;CAE12158;CAE12159;CAE12159.1;CAH71420;CAH71420.1;CAH71421;CAH71421.1;CAH7…	Q5K4L6;Q5VUQ7;Q5VUQ8;Q5VUR3;Q6ZV16;Q8N2X7;Q8TEJ0;Q96SW5;Q9BTJ5;Q9BTY5	SLC27A3	solute carrier family 27 (fatty acid transporter), member 3	long-chain fatty acid transport protein 3; very long-chain acyl-CoA synthetase homolog 3; fatty acid transport protein 3; OTTHUMP00000038688; OTTHUMP00000035252; solute carrier family 27 member 3; FATP-3	Long-chain fatty acid transport protein 3	0.541	0.001386
88	A_72_P380398	SYWM	AC_000044;AC_000133;NC_000001;NM_015836;NM_201263;NP_056651;NP_957715;NT_032977;NW_001838594;NW_922462	AAH44575;AAH44575.1;AC_000044;AC_000133;ADQ32964;AJ242739;AK223197;AK296799;AK299547;AK300295;AK313740;AL139420;AL359823;AL590288;BAD96917;BAD96917.1;BAG36481;BAG36481.1;BAH12434;BAH13063;BAH13253;BC021722;BC039889;BC044575;BM834499;CAB63107;CAB63107.1;CAH71367;CAH71367.1;CAH71368;CAI21995;CAI21995.1;CAI21996;CAI22501;CAI22501.1;CAI22502;CH471122;CR590727;CR599172;CR621696;EAW56693;EAW56693.1;EAW…	B2R9D4;Q53FT4;Q5VUD2;Q86TQ0;Q9UGM6	WARS2	tryptophanyl tRNA synthetase 2, mitochondrial	(Mt)TrpRS; tryptophanyl-tRNA synthetase, mitochondrial; tryptophan--tRNA ligase; OTTHUMP00000014272; OTTHUMP00000014273; tryptophan tRNA ligase 2, mitochondrial; tryptophan-tRNA ligase	Tryptophanyl-tRNA synthetase, mitochondrial	0.282	0.002948
89	A_72_P146686	Sirtuin	AC_000054;AC_000143;NC_000011;NM_001017524;NM_012239;NP_001017524;NP_036371;NT_009237;NW_001838015;NW_924951	AA279020;AAD40851;AAD40851.1;AAH01042;AAH01042.1;AC069287;AC136475;AC_000054;AC_000143;AF015416;AF083108;AI091200;AK074992;AK298572;AK299009;AK299438;AK301558;AK301979;AK308681;AK316175;AL137276;AL535769;BAH12816;BAH12927;BAH13032;BAH13513;BAH13600;BAH14546;BC001042;BI755839;BM709066;BM973763;CAB70674;CAB70674.1;CAL00156;CAL00157;CAL48199;CAN36293;CH471278;CR592147;CR598105;CR618015;CR624703;CS33…	Q9NTG7;Q9Y6E8	SIRT3	sirtuin 3	sirtuin (silent mating type information regulation 2 homolog) 3 (S. cerevisiae); SIR2-like protein 3; NAD-dependent deacetylase sirtuin-3, mitochondrial; OTTHUMP00000230526; sirtuin (silent mating type information regulation 2, S.cerevisiae, homolog) 3; mitochondrial nicotinamide adenine dinucleotide-dependent deacetylase; silent mating type information regulation 2, S.cerevisiae, homolog 3; OTTH…		-0.667	0.007652
90	A_72_P146686	Sirtuin3	AC_000054;AC_000143;NC_000011;NM_001017524;NM_012239;NP_001017524;NP_036371;NT_009237;NW_001838015;NW_924951	AA279020;AAD40851;AAD40851.1;AAH01042;AAH01042.1;AC069287;AC136475;AC_000054;AC_000143;AF015416;AF083108;AI091200;AK074992;AK298572;AK299009;AK299438;AK301558;AK301979;AK308681;AK316175;AL137276;AL535769;BAH12816;BAH12927;BAH13032;BAH13513;BAH13600;BAH14546;BC001042;BI755839;BM709066;BM973763;CAB70674;CAB70674.1;CAL00156;CAL00157;CAL48199;CAN36293;CH471278;CR592147;CR598105;CR618015;CR624703;CS33…	Q9NTG7;Q9Y6E8	SIRT3	sirtuin 3	sirtuin (silent mating type information regulation 2 homolog) 3 (S. cerevisiae); SIR2-like protein 3; NAD-dependent deacetylase sirtuin-3, mitochondrial; OTTHUMP00000230526; sirtuin (silent mating type information regulation 2, S.cerevisiae, homolog) 3; mitochondrial nicotinamide adenine dinucleotide-dependent deacetylase; silent mating type information regulation 2, S.cerevisiae, homolog 3; OTTH…	NAD-dependent deacetylase sirtuin-3, mitochondrial	-0.667	0.007652
91	A_72_P343218	Slp76	AC_000048;AC_000137;NC_000005;NM_005565;NP_005556;NT_023133;NW_001838954;NW_922784	AAA93308;AAC50135;AAC50135.1;AAH16618;AAH16618.1;AAP35937;AAP35937.1;ABM81607;ABM84789;AC034199;AC_000048;AC_000137;AK122637;AK292890;AK296098;AK300000;AK310369;BAF85579;BAG58851;BAG61819;BC016618;BG911397;BT007273;CBA11531;CH471062;DQ890681;DQ893863;EAW61478;EAW61479;EAW61479.1;EAW61480;FN432830;NC_000005;NM_005565;NP_005556;NT_023133;NW_001838954;NW_922784;Q13094;Q14759;U20158;U44065	Q13094;Q53XV4	LCP2	lymphocyte cytosolic protein 2 (SH2 domain containing leukocyte protein of 76kDa)	SH2 domain-containing leukocyte protein of 76 kDa; SLP-76 tyrosine phosphoprotein; lymphocyte cytosolic protein 2 (SH2 domain-containing leukocyte protein of 76kD); OTTHUMP00000223178; OTTHUMP00000223180; lymphocyte cytosolic protein 2; 76 kDa tyrosine phosphoprotein; SH2 domain-containing leukocyte protein of 76kD	Lymphocyte cytosolic protein 2	-0.206	0.004534
92	A_72_P069846	TAFs	AC_000048;AC_000137;NC_000005;NM_001015891;NM_001015892;NM_003187;NM_016283;NP_001015891;NP_001015892;NP_003178;NP_057367;NT_006713;NW_001838935;NW_003315917;NW_922618	AAA84389;AAA84389.1;AAA91318;AAA91318.1;AAC50153;AAC50153.1;AAD34132;AAD34132.1;AAF14860;AAF14860.1;AAH03400;AAH03400.1;AAH07349;AAH07349.1;AAH07426;AAH07426.1;AAH33320;AAH33320.1;AAN84793;AAN84793.1;AAV38458;AAV38458.1;AC145132;AC145145;ACE86721;ACE87407;AC_000048;AC_000137;AF110777;AF151895;AI879232;AJ878880;AJ878881;AY189986;BC003400;BC007349;BC007426;BC033320;BG490028;BG720149;BT019652;BX1178…	A8MSZ6;D3DWA3;Q16594;Q5F2S9;Q5U0D1;Q9BTS1;Q9Y3D8	TAF9	TAF9 RNA polymerase II, TATA box binding protein (TBP)-associated factor, 32kDa	coilin-interacting nuclear ATPase protein; transcription initiation factor TFIID subunit 9; adenylate kinase isoenzyme 6; RNA polymerase II TBP-associated factor subunit G; TAFII-32; TAFII-31; STAF31/32; TATA box binding protein (TBP)-associated factor, RNA polymerase II, G, 32kD; coilin interacting protein; OTTHUMP00000125196; transcription initiation factor TFIID 31 kD subunit; OTTHUMP000002221…		-0.7237	0.003393
93	A_72_P069846	TFIID	AC_000048;AC_000137;NC_000005;NM_001015891;NM_001015892;NM_003187;NM_016283;NP_001015891;NP_001015892;NP_003178;NP_057367;NT_006713;NW_001838935;NW_003315917;NW_922618	AAA84389;AAA84389.1;AAA91318;AAA91318.1;AAC50153;AAC50153.1;AAD34132;AAD34132.1;AAF14860;AAF14860.1;AAH03400;AAH03400.1;AAH07349;AAH07349.1;AAH07426;AAH07426.1;AAH33320;AAH33320.1;AAN84793;AAN84793.1;AAV38458;AAV38458.1;AC145132;AC145145;ACE86721;ACE87407;AC_000048;AC_000137;AF110777;AF151895;AI879232;AJ878880;AJ878881;AY189986;BC003400;BC007349;BC007426;BC033320;BG490028;BG720149;BT019652;BX1178…	A8MSZ6;D3DWA3;Q16594;Q5F2S9;Q5U0D1;Q9BTS1;Q9Y3D8	TAF9	TAF9 RNA polymerase II, TATA box binding protein (TBP)-associated factor, 32kDa	coilin-interacting nuclear ATPase protein; transcription initiation factor TFIID subunit 9; adenylate kinase isoenzyme 6; RNA polymerase II TBP-associated factor subunit G; TAFII-32; TAFII-31; STAF31/32; TATA box binding protein (TBP)-associated factor, RNA polymerase II, G, 32kD; coilin interacting protein; OTTHUMP00000125196; transcription initiation factor TFIID 31 kD subunit; OTTHUMP000002221…		-0.7237	0.003393
94	A_72_P069846	TFIID 31 kDa subunit	AC_000048;AC_000137;NC_000005;NM_001015891;NM_001015892;NM_003187;NM_016283;NP_001015891;NP_001015892;NP_003178;NP_057367;NT_006713;NW_001838935;NW_003315917;NW_922618	AAA84389;AAA84389.1;AAA91318;AAA91318.1;AAC50153;AAC50153.1;AAD34132;AAD34132.1;AAF14860;AAF14860.1;AAH03400;AAH03400.1;AAH07349;AAH07349.1;AAH07426;AAH07426.1;AAH33320;AAH33320.1;AAN84793;AAN84793.1;AAV38458;AAV38458.1;AC145132;AC145145;ACE86721;ACE87407;AC_000048;AC_000137;AF110777;AF151895;AI879232;AJ878880;AJ878881;AY189986;BC003400;BC007349;BC007426;BC033320;BG490028;BG720149;BT019652;BX1178…	A8MSZ6;D3DWA3;Q16594;Q5F2S9;Q5U0D1;Q9BTS1;Q9Y3D8	TAF9	TAF9 RNA polymerase II, TATA box binding protein (TBP)-associated factor, 32kDa	coilin-interacting nuclear ATPase protein; transcription initiation factor TFIID subunit 9; adenylate kinase isoenzyme 6; RNA polymerase II TBP-associated factor subunit G; TAFII-32; TAFII-31; STAF31/32; TATA box binding protein (TBP)-associated factor, RNA polymerase II, G, 32kD; coilin interacting protein; OTTHUMP00000125196; transcription initiation factor TFIID 31 kD subunit; OTTHUMP000002221…	Transcription initiation factor TFIID subunit 9	-0.7237	0.003393
95	A_72_P069846	TFTC complex	AC_000048;AC_000137;NC_000005;NM_001015891;NM_001015892;NM_003187;NM_016283;NP_001015891;NP_001015892;NP_003178;NP_057367;NT_006713;NW_001838935;NW_003315917;NW_922618	AAA84389;AAA84389.1;AAA91318;AAA91318.1;AAC50153;AAC50153.1;AAD34132;AAD34132.1;AAF14860;AAF14860.1;AAH03400;AAH03400.1;AAH07349;AAH07349.1;AAH07426;AAH07426.1;AAH33320;AAH33320.1;AAN84793;AAN84793.1;AAV38458;AAV38458.1;AC145132;AC145145;ACE86721;ACE87407;AC_000048;AC_000137;AF110777;AF151895;AI879232;AJ878880;AJ878881;AY189986;BC003400;BC007349;BC007426;BC033320;BG490028;BG720149;BT019652;BX1178…	A8MSZ6;D3DWA3;Q16594;Q5F2S9;Q5U0D1;Q9BTS1;Q9Y3D8	TAF9	TAF9 RNA polymerase II, TATA box binding protein (TBP)-associated factor, 32kDa	coilin-interacting nuclear ATPase protein; transcription initiation factor TFIID subunit 9; adenylate kinase isoenzyme 6; RNA polymerase II TBP-associated factor subunit G; TAFII-32; TAFII-31; STAF31/32; TATA box binding protein (TBP)-associated factor, RNA polymerase II, G, 32kD; coilin interacting protein; OTTHUMP00000125196; transcription initiation factor TFIID 31 kD subunit; OTTHUMP000002221…		-0.7237	0.003393
96	A_72_P423544	TRPT1	AC_000054;AC_000143;NC_000011;NG_016360;NM_001033678;NM_001160389;NM_001160390;NM_001160392;NM_001160393;NM_031472;NP_001028850;NP_001153861;NP_001153862;NP_001153864;NP_001153865;NP_113660;NT_167190;NW_001838024;NW_925106	AAH05133;AAH05133.1;AAO62941;AAO62941.1;AC_000054;AC_000143;ADQ32835;AK026364;AP005668;AP006334;AW771318;AY211494;BC005133;BG105545;BM982538;BQ672032;BQ674339;CH471076;CR591349;CR599436;DA822624;DR004975;EAW74201;EAW74202;EAW74202.1;EAW74203;HQ448355;NC_000011;NG_016360;NM_001033678;NM_001160389;NM_001160390;NM_001160392;NM_001160393;NM_031472;NP_001028850;NP_001153861;NP_001153862;NP_001153864;N…	A8MYC9;Q86TN4;Q9BSB9	TRPT1	tRNA phosphotransferase 1	OTTHUMP00000237336; tRNA 2'-phosphotransferase 1; OTTHUMP00000237493; OTTHUMP00000237040; OTTHUMP00000237038; tRNA splicing 2' phosphotransferase 1	tRNA 2'-phosphotransferase 1	-0.771	0.007876
97	A_72_P210877	Thrombin	AC_000054;AC_000143;NC_000011;NG_008953;NM_000506;NP_000497;NT_009237;NW_001838022;NW_925006	AAA60220;AAB24476;AAC63054;AAC63054.1;AAH51332;AAH51332.1;AAL77436;AAL77436.1;AAM11680;AAR08142;AAR08143;AC115088;ACE87074;ACE87755;AC_000054;AC_000143;AF478696;AF493953;AJ544114;AJ972449;AK222775;AK222777;AK293326;AK303747;AK312965;AY344793;AY344794;BAD96495;BAD96495.1;BAD96497;BAD96497.1;BAG35804;BAG35804.1;BAG56844;BAG64719;BAG64719.1;BC051332;CAA23842;CAA23842.1;CAD80258;CAJ01369;CAJ01369.1;C…	B2R7F7;B4E1A7;P00734;Q4QZ40;Q53H04;Q53H06;Q7Z7P3;Q9UCA1	F2	coagulation factor II (thrombin)	OTTHUMP00000197117; prothrombin; serine protease; prothrombin B-chain; OTTHUMP00000233661	Prothrombin	-0.7016	0.005914
98	A_72_P156706;A_72_P237547;A_72_P402843	Thymosin beta-10	AC_000045;AC_000134;NC_000002;NM_021103;NP_066926;NT_022184;NW_001838769;NW_927719	AAA36744;AAA36744.1;AAA36746;AAA36746.1;AAB25225;AAB25225.1;AAC41691;AAC41691.1;AAH16025;AAH16025.1;AAH16731;AAH16731.1;AAS47517;AAY24191;AC022210;ACE86535;ACE86919;ACE87214;ACE87606;AC_000045;AC_000134;AK130949;AK311952;AY453400;BAG34892;BC016025;BC016731;BC107889;CH471053;CR595675;EAW99547;EAW99548;EU831614;EU831701;EU832349;EU832434;M20259;M92381;M92383;NC_000002;NM_021103;NP_066926;NT_022184;…	P13472;P63313	TMSB10	thymosin beta 10	thymosin beta-10; OTTHUMP00000160498; migration-inducing gene 12; migration-inducing protein 12	Thymosin beta-10	0.2666	0.0006482
99	A_72_P162596	Uroplakin Ib	AC_000046;AC_000135;NC_000003;NM_006952;NP_008883;NT_005612;NW_001838881;NW_921807	AAC17446;AAC17446.1;AAC77794;AAC77794.1;AAD09401;AAD09401.1;AAH63568;AAH63568.1;AB002155;AB015234;AC083800;AC_000046;AC_000135;ADQ32551;AF042331;AF067147;AF082888;AF324865;AK225868;AK303924;AK313787;AL709739;BAA33724;BAA33724.1;BAA88878;BAA88878.1;BAG36524;BAG64852;BC012851;BC063568;CAG33365;CH471052;CR457084;CR598921;CR624397;EAW79577;HQ448070;NC_000003;NM_006952;NP_008883;NT_005612;NW_001838881…	O60753;O75841;Q9UIM2;Q9UNX6	UPK1B	uroplakin 1B	tetraspan; uroplakin Ib; tetraspanin-20; uroplakin-1b; UP1b; OTTHUMP00000215020; tspan-20; OTTHUMP00000215021; OTTHUMP00000215022; OTTHUMP00000215018; OTTHUMP00000215019	Uroplakin-1b	0.3744	0.0001169
100	A_72_P223767	VLDL	AC_000062;AC_000151;NC_000019;NG_007084;NM_000041;NP_000032;NT_011109;NW_001838496;NW_927217	AAB59397;AAB59397.1;AAB59518;AAB59518.1;AAB59546;AAB59546.1;AAD02505;AAD02505.1;AAG27089;AAG27089.1;AAH03557;AAH03557.1;AAL82810;AB035149;ABM83474;ABM86685;AC011481;ACN81314;ACN81314.1;AC_000062;AC_000151;AF050154;AF261279;AK314898;AY077451;BAA96080;BAA96080.1;BAG37412;BAG37412.1;BC003557;BU848796;CAA25017;CAA63051;CAA94806;CH471126;DQ892548;DQ895759;EAW57306;FJ525876;K00396;M10065;M12529;NC_0000…	B2RC15;C0JYY5;P02649;Q9P2S4	APOE	apolipoprotein E	apo-E; OTTHUMP00000197075; OTTHUMP00000159143; OTTHUMP00000197077; Alzheimer disease 2 (APOE*E4-associated, late onset); OTTHUMP00000197076; apolipoprotein E3		-0.4211	0.002225
101	A_72_P220622	WASF2	AC_000044;AC_000133;NC_000001;NM_001201404;NM_006990;NP_001188333;NP_008921;NT_004610;NW_001838576;NW_921351	AAH32724;AAH40943;AAH40943.1;AB026542;AC_000044;AC_000133;AK025566;AK075231;AK303011;AK304750;AL096774;AL663122;AY007122;BAA81795;BAA81795.1;BAC11488;BAG64142;BAG65507;BC012329;BC032380;BC032724;BC040943;BX293535;CAC18518;CAC18518.1;CH471059;DC376823;EAX07753;NC_000001;NM_001201404;NM_006990;NP_001188333;NP_008921;NT_004610;NW_001838576;NW_921351;Q05BU7;Q8NBU0;Q9Y6W5	O60794;Q9UDY7;Q9Y6W5	WASF2	WAS protein family, member 2	WASP family Verprolin-homologous protein 2; WASP family protein member 2; protein WAVE-2; OTTHUMP00000003471; IMD2; verprolin homology domain-containing protein 2; suppressor of cyclic-AMP receptor (WASP-family); wiskott-Aldrich syndrome protein family member 2	Wiskott-Aldrich syndrome protein family member 2	0.5813	0.005994
102	A_72_P391178	WDR71	AC_000054;AC_000143;NC_000011;NM_025155;NP_079431;NT_167190;NW_001838028;NW_925106	AAH06142;AAH06142.2;AAH21541;AAH21541.1;AAH28628;AAH28628.1;AAP97194;AAP97194.1;AC_000054;AC_000143;ADQ32653;AF087895;AK021910;AK222501;AK225520;AK298258;AK309133;AK316394;AP002770;BAB13933;BAB13933.1;BAD96221;BAD96221.1;BAG60522;BAH14765;BC006142;BC021541;BC028628;BC028677;BC045774;CH471076;CR608221;CR621285;CR623159;EAW74917;EAW74917.1;EAW74918;EAW74919;HQ448172;NC_000011;NM_025155;NP_079431;NT…	A6NDR5;Q4G165;Q53HS9;Q7Z500;Q8TBU6;Q9BRP4;Q9HAB6	PAAF1	proteasomal ATPase-associated factor 1	WD repeat domain 71; OTTHUMP00000237779; OTTHUMP00000237788; OTTHUMP00000237785; OTTHUMP00000237778; OTTHUMP00000237784; OTTHUMP00000237782; WD repeat-containing protein 71	Proteasomal ATPase-associated factor 1	0.9299	0.006013
103	A_72_P435834	ZAK	AC_000045;AC_000134;NC_000002;NG_029373;NM_016653;NM_133646;NP_057737;NP_598407;NT_005403;NW_001838862;NW_921585	AA258354;AAF63490;AAF63490.1;AAF65822;AAF65822.1;AAH01401;AAH01401.1;AAK11615;AAK11615.1;AAL85891;AAL85891.1;AAL85892;AAL85892.1;AAO33376;AAO33376.1;AAX82002;AAX82002.1;AAX93067;AAX93067.1;AB030034;AB041883;AB049733;AB049734;AB208974;AC013461;AC019046;AC092573;AC_000045;AC_000134;AF238255;AF251441;AF325454;AF465843;AF480461;AF480462;AI799498;AK056310;AK095825;AK096877;AK291825;AK298634;AL833180;B…	B3KPG2;Q53SX1;Q580W8;Q59GY5;Q86YW8;Q9HCC4;Q9HCC5;Q9HDD2;Q9NYE9;Q9NYL2	ZAK	sterile alpha motif and leucine zipper containing kinase AZK	mixed lineage kinase-related kinase MRK-beta; mixed lineage kinase 7; mitogen-activated protein kinase kinase kinase MLT; HCCS-4; human cervical cancer suppressor gene 4 protein; OTTHUMP00000205097; OTTHUMP00000163141; OTTHUMP00000163140; mixed lineage kinase with a leucine zipper and a sterile alpha motif; MLK-like mitogen-activated protein triple kinase	Mitogen-activated protein kinase kinase kinase MLT	-0.6097	0.004351
104	A_72_P122031	ZO-2	AC_000052;AC_000141;NC_000009;NG_016342;NM_001170414;NM_001170415;NM_001170416;NM_001170630;NM_004817;NM_201629;NP_001163885;NP_001163886;NP_001163887;NP_001164101;NP_004808;NP_963923;NT_008470;NW_001839221;NW_924484	AA724570;AAA61300;AAA61300.1;AAB41794;AAB41794.1;AAC02527;AAC02527.2;AAC33121;AAC33121.1;AAC33122;AAC33122.1;AAD20387;AAD20387.2;AAD56218;AAD56218.2;AAD56219;AAD56219.2;AAH27592;AAH27592.1;AAM28524;AAM28524.1;AC_000052;AC_000141;AF043195;AF043196;AF043197;AF083892;AF083893;AF177518;AF177519;AF177520;AF177521;AF177522;AF177523;AF177524;AF177525;AF177526;AF177527;AF177528;AF177529;AF177530;AF177531…	A2A3H9;Q15883;Q5VXL0;Q5VXL1;Q8N756;Q8NI14;Q99839;Q9UDY0;Q9UDY1;Q9UDY2	TJP2	tight junction protein 2 (zona occludens 2)	tight junction protein ZO-2; OTTHUMP00000161623; OTTHUMP00000021432; zonula occludens protein 2; Friedreich ataxia region gene X104 (tight junction protein ZO-2); OTTHUMP00000021431	Tight junction protein ZO-2	-0.3029	0.004637
105	A_72_P204682	hnRNP A1	AC_000055;AC_000144;NC_000012;NM_002136;NM_031157;NP_002127;NP_112420;NT_029419;NW_001838059;NW_925395	AAH02355;AAH02355.1;AAH04945;AAH09600;AAH09600.1;AAH12158;AAH12158.1;AAH33714;AAH33714.1;AAH52296;AAH52296.1;AAH70315;AAH70315.1;AAH71945;AAH73162;AAH74502;AAH74502.1;AAI03708;AAI03708.1;AAI04237;AAI04238;AAI21134;AC078778;AC_000055;AC_000144;AK129814;AK291113;AK298176;AK303303;AK308679;BAF83802;BAF83802.1;BAG60447;BAG64377;BC002355;BC004945;BC009600;BC012158;BC020442;BC033714;BC035253;BC052296;B…	A8K4Z8;P09651;Q3MIB7;Q6PJZ7	HNRNPA1	heterogeneous nuclear ribonucleoprotein A1	nuclear ribonucleoprotein particle A1 protein; single-strand RNA-binding protein; hnRNP core protein A1; single-strand DNA-binding protein UP1; helix-destabilizing protein; heterogeneous nuclear ribonucleoprotein B2 protein; heterogeneous nuclear ribonucleoprotein A1B protein; Putative heterogeneous nuclear ribonucleoprotein A1-like 3; hnRNP A1-like 3; hnRNP core protein A1-like 3; heterogeneous …	Heterogeneous nuclear ribonucleoprotein A1	0.9031	0.0009451
106	A_72_P041371	rBAT	AC_000045;AC_000134;NC_000002;NG_008233;NG_016429;NM_000341;NP_000332;NT_022184;NW_001838769;NW_927719	AAA35500;AAA35500.1;AAA81778;AAA81778.1;AAB39829;AAB39829.1;AAH22386;AAH22386.1;AAH93624;AAH93624.1;AAH93626;AAH93626.1;AAX88955;AAX88955.1;AAY89643;AAY89644;AAY89645;AAY89646;AAY89647;AAY89648;AB033549;ABM82957;ABM86148;AC013717;AC_000045;AC_000134;AK091932;AK092000;AK223146;AK289636;AK309145;AK313157;BAA11541.1;BAB16841;BAB16841.1;BAD96866;BAD96866.1;BAF82325;BAF82325.1;BAG35975;BAG52443;BC0223…	A8K0S1;O00658;Q07837;Q15295;Q52M92;Q52M94	SLC3A1	solute carrier family 3 (cystine, dibasic and neutral amino acid transporters, activator of cystine, dibasic and neutral amino acid transport), member 1	neutral and basic amino acid transport protein rBAT; OTTHUMP00000158957; SLC3A1 variant G; OTTHUMP00000202387; OTTHUMP00000202389; SLC3A1 variant B; SLC3A1 variant F; SLC3A1 variant D; OTTHUMP00000202388; solute carrier family 3 (cystine, dibasic and neutral amino acid transporters), member 1; SLC3A1 variant C; OTTHUMP00000202385; amino acid transporter 1; SLC3A1 variant E; B(0,+)-type amino acid…	Neutral and basic amino acid transport protein rBAT	-1.801	0.006934
107	A_72_P220622		AC_000066;AC_000155;NC_000023;NG_007616;NT_079573;NW_001842362;NW_927702	AAD33053.2;AC_000066;AC_000155;AF134304;AJ509090;AL022578;CAD48858;CAD48858.1;NC_000023;NG_007616;NT_079573;NW_001842362;NW_927702	Q8IV90	WASF4P	WAS protein family, member 4, pseudogene	WAS protein family, member 4		0.5813	0.005994
108	A_72_P210877		AC_000054;AC_000143;NC_000011;NG_008953;NM_000506;NP_000497;NT_009237;NW_001838022;NW_925006	AAA60220;AAB24476;AAC63054;AAC63054.1;AAH51332;AAH51332.1;AAL77436;AAL77436.1;AAM11680;AAR08142;AAR08143;AC115088;ACE87074;ACE87755;AC_000054;AC_000143;AF478696;AF493953;AJ544114;AJ972449;AK222775;AK222777;AK293326;AK303747;AK312965;AY344793;AY344794;BAD96495;BAD96495.1;BAD96497;BAD96497.1;BAG35804;BAG35804.1;BAG56844;BAG64719;BAG64719.1;BC051332;CAA23842;CAA23842.1;CAD80258;CAJ01369;CAJ01369.1;C…	B2R7F7;B4E1A7;P00734;Q4QZ40;Q53H04;Q53H06;Q7Z7P3;Q9UCA1	F2	coagulation factor II (thrombin)	OTTHUMP00000197117; prothrombin; serine protease; prothrombin B-chain; OTTHUMP00000233661		-0.7016	0.005914
109	A_72_P410233		No ID	A8MUB0;AC080145	A8MUB0	FAM149B2	family with sequence similarity 149, member B2	KIAA0974 pseudogene		-0.2418	0.009997
