# Supplementary material for: Investigations on Transgenerational Epigenetic Response Down the Male Line in F2 Pigs
Source: PLoS One. 2012 Feb 16;7(2):e30583. doi: 10.1371/journal.pone.0030583 (PMC3281031; doi:10.1371/journal.pone.0030583)
Supplement: Table S3 — Dataset of kidney mapped to human orthologous genes (XLS). (XLSX) [file pone.0030583.s006.xlsx]

## Sheet: Sheet1
Kidney
List Report
GeneGo Data											analysis_kidney_filtered
#	Input IDs	Network Object Name	Entrez Gene IDs	RefSeq IDs	GenBank IDs	SwissProt IDs	Gene Symbol	Gene Name	Gene Synonyms	Description	Signal	p-value
1	A_72_P098751	ALOX12	239	AC_000060;AC_000149;NC_000017;NM_000697;NP_000688;NT_010718;NW_001838403;NW_926584	AAA51533;AAA51533.1;AAA51587;AAA51587.1;AAA59523;AAA59523.1;AAA60056;AAA60056.1;AAD14020;AAD14020.1;AAD14021;AAD32700;AAD32700.1;AAH69557;AAH69557.1;AAS00094;AAS00094.1;AC040977;AC_000060;AC_000149;AF143883;AY527817;BAA02162;BAA02162.1;BC069557;CH471108;D12638;EAW90281;M35418;M58704;M62982;M87004;NC_000017;NM_000697;NP_000688;NT_010718;NW_001838403;NW_926584;P18054;Q16120;S68587;S68588	O95569;P18054;Q6ISF8;Q9UQM4	ALOX12	arachidonate 12-lipoxygenase	OTTHUMP00000128281; platelet-type lipoxygenase 12; arachidonate 12-lipoxygenase, 12S-type; platelet 12-LOX; 12(S)-lipoxygenase; platelet-type 12-lipoxygenase; 12S-lipoxygenase	Arachidonate 12-lipoxygenase, 12S-type	-0.5384	3.32e-06
2	A_72_P146656	B-FABP	2173	AC_000049;AC_000138;NC_000006;NM_001446;NP_001437;NT_025741;NW_001838990;NW_923184	AAB87141;AAB87141.1;AAD00507;AAD00507.1;AAH12299;AAH12299.1;ABM82363;ABM85539;ABW03402;AC_000049;AC_000138;AI879148;AJ002962;AK091664;AK289836;AK311867;AL512688;AL645811;AW156936;BAA23324;BAA23324.1;BAA23645;BAA23645.1;BAF82525;BAG34808;BAG34808.1;BC012299;BI860090;CAA05773;CAA05773.1;CAC21646;CAG33338;CAG33338.1;CAI15448;CAI15449;CAI15449.1;CAV33163;CH471051;CR457057;D50373;D88648;DQ891437;DQ894…	B2R4L1;O14951;O15540;Q6IAU7	FABP7	fatty acid binding protein 7, brain	fatty acid-binding protein, brain; brain lipid-binding protein; fatty acid-binding protein 7; mammary-derived growth inhibitor related; brain-type fatty acid-binding protein; OTTHUMP00000017118; brain lipid binding protein; OTTHUMP00000017119; mammary-derived growth inhibitor-related	Fatty acid-binding protein, brain	0.7743	0.007988
3	A_72_P122971	BTBD11	121551	AC_000055;AC_000144;NC_000012;NM_001017523;NM_001018072;NP_001017523;NP_001018082;NT_029419;NW_001838061;NW_925395	A6QL63;AAH93627;AAH93627.1;AAH93629;AAH93629.1;AAI01562;AAI01562.1;AAI01564;AAI01564.1;AAI46825;AAI46825.1;AAR21078;AAR21078.1;AC007540;AC007649;AC009774;AC_000055;AC_000144;AI638039;AK091276;AK094304;AK122818;AK124835;AK127012;AK127295;AK128445;AY373588;BAC03626;BAC03626.1;BAC85963;BAC85963.1;BAG53742;BAG54422;BAG54475;BAG54675;BC027931;BC093627;BC093629;BC101561;BC101563;BC146824;CH471054;EAW97…	A4FU41;A6QL63;C9J019;C9JK80;Q3ZTQ4;Q52M89;Q6ZV99;Q8N245	BTBD11	BTB (POZ) domain containing 11	OTTHUMP00000197306; ankyrin repeat and BTB/POZ domain-containing protein BTBD11; BTB/POZ domain-containing protein 11; OTTHUMP00000197305; ANK-repeat BTB domain containing protein	Ankyrin repeat and BTB/POZ domain-containing protein BTBD11	0.7366	0.0002501
4	A_72_P355733	CCDC125	202243	AC_000048;AC_000137;NC_000005;NM_176816;NP_789786;NT_006713;NW_001838935;NW_003315917;NW_922618	AAI13750;AAI60002;AB024691;AB024692;AC145132;AC145145;AC_000048;AC_000137;AI141520;AK299871;AL832658;BAC57450;BAC57450.1;BAC57451;BAC57451.1;BAG61723;BC108715;BC113749;BC160002;BQ923745;CH471137;EAW51298;EAW51299;NC_000005;NM_176816;NP_789786;NT_006713;NW_001838935;NW_003315917;NW_922618;Q2HJ12;Q86Z20	Q86Z19;Q86Z20	CCDC125	coiled-coil domain containing 125	OTTHUMP00000192869; coiled-coil domain-containing protein 125; OTTHUMP00000222129; Kenae; OTTHUMP00000161932	Coiled-coil domain-containing protein 125	0.4781	0.007009
5	A_72_P302714	CD1b	910	AC_000044;AC_000133;NC_000001;NM_001764;NP_001755;NT_004487;NW_001838531;NW_925683	AAA51936;AAA51936.1;AAA51939;AAA51939.1;AAA51940;AAA51940.1;AAD37579;AAH69481;AAH69481.1;AAH74747;AAH74747.1;AAI04217;AAI04217.1;AAI04218;AAI04218.1;AC_000044;AC_000133;ADQ32930;AF142666;AI336342;AK303329;AK303330;AK310617;AL121986;BAG64394;BAG64395;BC069481;BC074747;BC104216;BC104217;CAI10852;CAI10852.1;CAI10853;CAI10853.1;CD687240;CH471121;CR601779;EAW52841;HQ448450;M14665;M22168;M22169;M22170;…	P29016;Q5TDK9;Q5TDL0;Q9UMM2	CD1B	CD1b molecule	differentiation antigen CD1-alpha-3; OTTHUMP00000035065; CD1B antigen, b polypeptide; CD1b antigen; OTTHUMP00000018908; T-cell surface glycoprotein CD1b; cortical thymocyte antigen CD1B	T-cell surface glycoprotein CD1b	-0.3013	0.005603
6	A_72_P218187	COIL	8161	AC_000060;AC_000149;NC_000017;NM_004645;NP_004636;NT_010783;NW_001838448;NW_926894	AAA36412;AAA36412.1;AAB81550;AAB81550.1;AAH10385;AAH10385.1;ABM83853;ABM87175;AC004584;AC_000060;AC_000149;AK313616;AW021880;BAG36378;BAG36378.1;BC010385;CH471109;CR594693;CR605137;CR610327;CR611341;DQ892927;DQ896176;EAW94522;EAW94522.1;M58411;NC_000017;NM_004645;NP_004636;NT_010783;NW_001838448;NW_926894;P38432;U06632	B2R931;P38432	COIL	coilin	p80; coilin p80	Coilin	1.409	0.007355
7	A_72_P008661	CTP synthase II	56474	AC_000066;AC_000155;NC_000023;NG_013229;NM_001144002;NM_019857;NM_175859;NP_001137474;NP_062831;NP_787055;NT_167197;NW_001842360;NW_927700	AAF91241;AAF91241.1;AAH06256;AAH06256.2;AAH34986;AAH34986.1;AC073909;AC_000066;AC_000155;ADZ15913;AF086422;AF226667;AK023549;AK024070;AK025654;AK125332;AK125348;AK309508;AL445467;BAB14607;BAB14607.1;BAB14814;BAB14814.1;BAB15204;BAG54184;BAG54184.1;BAG54188;BAG54188.1;BC006256;BC034986;BX647712;CAI40085;CAI40086;CAI40086.1;CH471074;EAW98912;EAW98912.1;EAW98913;EAW98914;EAW98915;JF432696;NC_000023;…	B3KWM2;Q9BRI0;Q9H809;Q9H8K9;Q9NRF8	CTPS2	CTP synthase II	cytidine 5'-triphosphate synthetase 2; UTP--ammonia ligase 2; CTP synthase 2; UTP-ammonia ligase; OTTHUMP00000022985; CTP synthetase isoform; CTP synthetase 2; CTP synthetase type 2; OTTHUMP00000022986	CTP synthase 2	0.4581	0.001119
8	A_72_P176011	CYP2C18	1562	AC_000053;AC_000142;NC_000010;NG_008373;NM_000772;NM_001128925;NP_000763;NP_001122397;NT_030059;NW_001838005;NW_924884	AAA02630;AAA02630.1;AAB59356;AAB59356.1;AAH69666;AAH69666.1;AAH96257;AAH96257.1;AAH96258;AAH96258.1;AAH96260;AC_000053;AC_000142;ADQ31959;AK223510;AK308558;AK313403;AL157835;AL583836;BAD97230;BAG36199;BAG36199.1;BC069666;BC096257;BC096258;BC096259;BC096260;BJ993698;BX538127;CAA39833;CAD98029;CAH74067;CAH74067.1;CH471066;EAW50024;EAW50024.1;HQ447473;L16869;L16870;L16871;L16872;L16873;L16874;L16875…	B2R8K2;P33260;Q16703;Q16751;Q6GRG1	CYP2C18	cytochrome P450, family 2, subfamily C, polypeptide 18	(S)-mephenytoin hydroxylase associated cytochrome P450; CYPIIC18; cytochrome P450-6B/29C; cytochrome P450 2C18; cytochrome P450, subfamily IIC (mephenytoin 4-hydroxylase), polypeptide 18; unspecific monooxygenase; microsomal monooxygenase; flavoprotein-linked monooxygenase; cytochrome P450, subfamily IIC (mephenytoin 4-hydroxylase), polypeptide 17; OTTHUMP00000020131	Cytochrome P450 2C18	-2.027	0.002245
9	A_72_P176011	CYP2C19	1557	AC_000053;AC_000142;NC_000010;NG_008384;NM_000769;NP_000760;NT_030059;NW_001838005;NW_924884	AAA36660.1;AAA52145.1;AAB59426;AAB59426.1;AAI11847;AAL31347;AAL31347.1;AAL31348;AAL31348.1;AAV41877;AAV41877.1;AB113829;AC_000053;AC_000142;AL133513;AL583836;AY796203;BAD02827;BC111846;CAA46778;CAH73444;CAH73444.1;CAH74068;CAH74068.1;L07093;L31506;L31507;L32982;L32983;L39097;L39098;L39099;L39100;L39101;L39102;M61854;M61858;NC_000010;NG_008384;NM_000769;NP_000760;NT_030059;NW_001838005;NW_924884;P…	P33259;P33261;Q8WZB1;Q8WZB2;Q9UCD4	CYP2C19	cytochrome P450, family 2, subfamily C, polypeptide 19	cytochrome P450-11A; mephenytoin 4'-hydroxylase; (S)-limonene 7-monooxygenase; mephenytoin 4-hydroxylase; cytochrome P450 2C19; (S)-limonene 6-monooxygenase; flavoprotein-linked monooxygenase; cytochrome P450, subfamily IIC (mephenytoin 4-hydroxylase), polypeptide 19; CYPIIC19; (R)-limonene 6-monooxygenase; S-mephenytoin 4-hydroxylase; OTTHUMP00000020132; microsomal monooxygenase; cytochrome P-45…	Cytochrome P450 2C19	-2.027	0.002245
10	A_72_P176011	CYP2C8	1558	AC_000053;AC_000142;NC_000010;NG_007972;NM_000770;NM_001198853;NM_001198854;NM_001198855;NP_000761;NP_001185782;NP_001185783;NP_001185784;NT_030059;NW_001838005;NW_924884	AAA35739;AAA35739.1;AAA35740;AAA35740.1;AAA52160;AAA52160.1;AAA52161;AAA52161.1;AAH20596;AAH20596.1;AAR89907;AAR89907.1;ABM82326;ABM85505;AC_000053;AC_000142;AK292753;AK293327;AK293328;AK298401;AK303813;AK315823;AL359672;AY514490;BAF85442;BAF85442.1;BAF98714;BAF98714.1;BAH11491;BAH11492;BAH12777;BAH14057;BC020596;CAA35915;CAA35915.1;CAA38578;CAA38578.1;CAA68550;CAA68550.1;CAH71307;CAH71307.1;CD01…	A8K9N8;B0AZN2;P10632;Q5VX93;Q8WWB1;Q9UCZ9	CYP2C8	cytochrome P450, family 2, subfamily C, polypeptide 8	OTTHUMP00000020134; cytochrome P450 MP-12; cytochrome P450 MP-20; cytochrome P450 IIC2; s-mephenytoin 4-hydroxylase; cytochrome P450, subfamily IIC (mephenytoin 4-hydroxylase), polypeptide 8; cytochrome P450 2C8; cytochrome P450 form 1; xenobiotic monooxygenase; microsomal monooxygenase; P450 form 1; OTTHUMP00000233373; flavoprotein-linked monooxygenase	Cytochrome P450 2C8	-2.027	0.002245
11	A_72_P176011	CYP2C9	1559	AC_000053;AC_000142;NC_000010;NG_008385;NM_000771;NP_000762;NT_030059;NW_001838005;NW_924884	AAA52157;AAA52157.1;AAA52158;AAA52158.1;AAA52159;AAA52159.1;AAB23864;AAB23864.2;AAD13466;AAD13467;AAH20754;AAH70317;AAI25055;AAP88931;AAP88931.1;AAT94065;AAT94065.1;AAW83816;AC_000053;AC_000142;AK289420;AK298458;AL359672;AY341248;AY702706;AY904366;BAA00123;BAA00123.1;BAF82109;BAG60671;BC020754;BC070317;BC125054;BJ993098;CAH71303;CH471066;D00173;EAW50019;EAW50020;L16880;L16883;M15331;M21939;M21940…	P11712;P11713;Q16756;Q16872	CYP2C9	cytochrome P450, family 2, subfamily C, polypeptide 9	flavoprotein-linked monooxygenase; cytochrome P450 PB-1; cytochrome P450 2C9; cytochrome P-450MP; cytochrome P450, subfamily IIC (mephenytoin 4-hydroxylase), polypeptide 9; cytochrome P-450 S-mephenytoin 4-hydroxylase; microsomal monooxygenase; xenobiotic monooxygenase; OTTHUMP00000020135	Cytochrome P450 2C9	-2.027	0.002245
12	A_72_P302624	DAT1	55885	AC_000055;AC_000144;NC_000012;NM_001001395;NM_018640;NP_001001395;NP_061110;NT_009714;NW_001838052;NW_925328	AAF71368;AAH17777;AAH26311;AAH26311.1;AAH50085;AAH50085.1;AB044745;AB044746;ABZ92403;AC007529;AC007552;AC_000055;AC_000144;AF258348;AK095595;AK294474;AK294909;AK308594;AK308826;AK308896;AK312418;AK316021;AL050152;AL050188;BAC04582;BAC04582.1;BAD93349;BAD93350;BAD93350.1;BAG35328;BAG57701;BAG57996;BAH14392;BC017777;BC026311;BC050085;BG714670;BI553855;CH471094;CR598247;CR611918;EAW96370;EAW96371;EA…	Q58A66;Q8N974;Q8TAP4;Q9UDD5	LMO3	LIM domain only 3 (rhombotin-like 2)	OTTHUMP00000239593; OTTHUMP00000239583; OTTHUMP00000239584; LMO-3; LIM domain only protein 3; OTTHUMP00000239576; neuronal-specific transcription factor DAT1; rhombotin-3; OTTHUMP00000239594; OTTHUMP00000239592; OTTHUMP00000239578; OTTHUMP00000239586; OTTHUMP00000239582; OTTHUMP00000239596; OTTHUMP00000239577; OTTHUMP00000239589; rhombotin-like 2; neuronal specific transcription factor DAT1	LIM domain only protein 3	0.2893	0.004578
13	A_72_P077636	Dynorphin	5173	AC_000063;AC_000152;NC_000020;NG_028027;NM_001190892;NM_001190898;NM_001190899;NM_001190900;NM_024411;NP_001177821;NP_001177827;NP_001177828;NP_001177829;NP_077722;NT_011387;NW_001838652;NW_927317	AAA58456;AAA58456.2;AAB59409.1;AAH26334;AAH26334.1;AAH32505.1;AAY53973;AAY53974;AAY53975;AAY53976;AAY53989;AAY53990;AAY53991;AAY53992;AC_000063;AC_000152;ADZ15893;AK289618;AK314908;AK316076;AL034562;AY902648;AY902649;AY902650;AY902651;AY902664;AY902665;AY902666;AY902667;BAF82307;BAF82307.1;BAG37420.1;BAH14447;BC026334;BC032505;CAA23767.1;CAA24999;CAA24999.1;CAB38875;CAB38875.1;CAG46607.1;CAG46627…	A8K0Q3;B2RC23;P01210;P01213;Q6FHC6;Q6FHE6	PDYN	prodynorphin	leu-enkephalin; beta-neoendorphin-dynorphin; proenkephalin-B; OTTHUMP00000030002; leumorphin; spinocerebellar ataxia 23; rimorphin; preproenkephalin B; preprodynorphin	Proenkephalin-B	-0.2458	0.006449
14	A_72_P091851	ENP1	953	AC_000053;AC_000142;NC_000010;NM_001098175;NM_001164178;NM_001164179;NM_001164181;NM_001164182;NM_001164183;NM_001776;NP_001091645;NP_001157650;NP_001157651;NP_001157653;NP_001157654;NP_001157655;NP_001767;NT_030059;NW_001838005;NW_924884	AAB32152;AAB32152.1;AAB47572;AAB47572.1;AAH47664;AC_000053;AC_000142;AJ133133;AJ133134;AK098240;AK098278;AK298648;AK301459;AK304018;AK304836;AK316009;AL356632;AL365273;AL547722;AL833543;BAG62981;BAG64933;BAG64933.1;BAG65580;BAH12835;BAH14380;BC047664;BF839210;BX537522;CAB41886;CAB41886.1;CAB41887;CAB41887.1;CAH73752;CAH73752.1;CAH73753;CAH73753.1;CAH73754;CAH73754.1;CAI16770;CAI16770.1;CAI16771;C…	A9Z1X8;B4E1X1;P49961;Q5T561;Q5T562;Q9UQQ9;Q9Y3Q9	ENTPD1	ectonucleoside triphosphate diphosphohydrolase 1	ecto-ATPase 1; ecto-ATP diphosphohydrolase 1; ecto-ATPDase 1; OTTHUMP00000020161; lymphoid cell activation antigen; CD39 antigen; NTPDase 1; ecto-apyrase; OTTHUMP00000020163	Ectonucleoside triphosphate diphosphohydrolase 1	-0.8575	0.006651
15	A_72_P146656	Fatty acid-binding protein	2173	AC_000049;AC_000138;NC_000006;NM_001446;NP_001437;NT_025741;NW_001838990;NW_923184	AAB87141;AAB87141.1;AAD00507;AAD00507.1;AAH12299;AAH12299.1;ABM82363;ABM85539;ABW03402;AC_000049;AC_000138;AI879148;AJ002962;AK091664;AK289836;AK311867;AL512688;AL645811;AW156936;BAA23324;BAA23324.1;BAA23645;BAA23645.1;BAF82525;BAG34808;BAG34808.1;BC012299;BI860090;CAA05773;CAA05773.1;CAC21646;CAG33338;CAG33338.1;CAI15448;CAI15449;CAI15449.1;CAV33163;CH471051;CR457057;D50373;D88648;DQ891437;DQ894…	B2R4L1;O14951;O15540;Q6IAU7	FABP7	fatty acid binding protein 7, brain	fatty acid-binding protein, brain; brain lipid-binding protein; fatty acid-binding protein 7; mammary-derived growth inhibitor related; brain-type fatty acid-binding protein; OTTHUMP00000017118; brain lipid binding protein; OTTHUMP00000017119; mammary-derived growth inhibitor-related		0.7743	0.007988
16	A_72_P177901	GPR100	339403	AC_000044;AC_000133;NC_000001;NM_181885;NP_871001;NT_004487;NW_001838531;NW_925683	AAI01508;AAI01508.1;AAI01510;AAI01510.1;AAO17676;AAO17676.1;AAP72124;AAP72124.1;AAQ92316;AAQ92316.1;AB065617;AB083593;ABY87928;ABY87928.1;AC_000044;AC_000133;AL355388;AX148192;AY170824;AY288415;AY394502;BAB89306;BAB89306.1;BAC05844;BAC05844.1;BC101507;BC101509;CAH72626;CAH72626.1;CH471121;DN693323;EAW53020;EU432129;NC_000001;NM_181885;NP_871001;NT_004487;NW_001838531;NW_925683;Q8TDU9	B0M0L4;Q3MJB1;Q8NGZ8;Q8TDU9	RXFP4	relaxin/insulin-like family peptide receptor 4	G-protein coupled receptor 100; RLN3 receptor 2; relaxin 3 receptor 2; insulin-like peptide INSL5 receptor; relaxin-3 receptor 2; G-protein coupled receptor GPCR142; OTTHUMP00000018853; relaxin family peptide receptor 4; G protein-coupled receptor 100	Relaxin-3 receptor 2	-0.2502	0.009135
17	A_72_P079001	Gamma-sarcoglycan	6445	AC_000056;AC_000145;NC_000013;NG_008759;NM_000231;NP_000222;NT_024524;NW_001838070;NW_925473	AAC50269;AAC50269.1;AAD13475;AAD13475.1;AAH74777;AAH74777.1;AAH74778;AAH74778.1;AAI09322;AAI09322.1;AC_000056;AC_000145;AK290620;AK316579;AL157766;AL160256;AL356287;BAF83309;BAG38167;BC074777;BC074778;BC109321;CAI13924;CAI13924.1;CAI16053;CAI16053.1;CAI16544;CAI16544.1;CH471075;DA897096;EAX08320;EAX08321;NC_000013;NG_008759;NM_000231;NP_000222;NT_024524;NW_001838070;NW_925473;Q13326;U34976;U63389…	Q13326;Q32M32;Q5T9J6	SGCG	sarcoglycan, gamma (35kDa dystrophin-associated glycoprotein)	gamma-sarcoglycan; 35DAG; 35 kDa dystrophin-associated glycoprotein; gamma-SG; sarcoglycan, gamma (35kD dystrophin-associated glycoprotein); OTTHUMP00000018112; gamma sarcoglycan; 35kD dystrophin-associated glycoprotein	Gamma-sarcoglycan	-0.804	0.002692
18	A_72_P282909	ID2	3398	AC_000045;AC_000134;NC_000002;NM_002166;NP_002157;NT_005334;NW_001838766;NW_927719	AAA58681;AAA58681.1;AAH30639;AAH30639.1;AAV35470;AAY14810;ABM81784;ABM84939;AC011747;AC_000045;AC_000134;AK222682;AK311988;AY634687;BAA02990;BAA02990.1;BAD96402;BAG34927;BC030639;BE222494;CH471053;CR607131;CR611001;CR614653;CR620423;CR620531;CR623038;CR626410;D13891;DQ890858;DQ894013;EAX01018;EAX01019;M97796;NC_000002;NM_002166;NP_002157;NT_005334;NW_001838766;NW_927719;Q02363;Q53H99;Q53T66	Q02363	ID2	inhibitor of DNA binding 2, dominant negative helix-loop-helix protein	cell growth-inhibiting gene 8; inhibitor of differentiation 2; helix-loop-helix protein ID2; DNA-binding protein inhibitor ID2; DNA-binding protein inhibitor ID-2; class B basic helix-loop-helix protein 26	DNA-binding protein inhibitor ID-2	0.7151	0.003877
19	A_72_P341523	IKAP	8518	AC_000052;AC_000141;NC_000009;NG_008788;NM_003640;NP_003631;NT_008470;NW_001839236;NW_924539	AAC64258;AAC64258.1;AAG43369;AAG43369.1;AAH33094;AB210033;AC_000052;AC_000141;AF044195;AF153419;AK001641;AK022559;AK024223;AK123257;AK127237;AK225798;AK289962;AK304742;AL049945;AL354797;AL359692;BAE06115;BAF82651;BAF82651.1;BAG50955;BAG50955.1;BAG51092;BAG51274;BAG53883;BAG54459;BAG65501;BC033094;BF968300;BX648204;CAB43219;CAB43219.1;CAH18235;CAI39465;CAI39465.1;CAI40569;CAI40569.1;CH471105;CR749…	O95163;Q5JSV2;Q9H327;Q9UG87	IKBKAP	inhibitor of kappa light polypeptide gene enhancer in B-cells, kinase complex-associated protein	IKK complex-associated protein; elongator complex protein 1; p150; dysautonomia (Riley-Day syndrome, hereditary sensory autonomic neuropathy type III); OTTHUMP00000021869; ikappaB kinase complex-associated protein	Elongator complex protein 1	-0.5844	0.0005143
20	A_72_P236577	IRTKS	55971	AC_000050;AC_000068;AC_000139;NC_000007;NG_013090;NM_018842;NP_061330;NT_007933;NT_079595;NW_001839064;NW_923574	AAD20937;AAD20937.1;AAF17223;AAF17223.2;AAH13888;AAH13888.1;AAS07549;AAS07549.1;AAS07550;AAS07550.1;AC004841;AC093169;AC093799;ACE87078;ACE87758;AC_000050;AC_000068;AC_000139;AF119666;AK027109;AK027142;AK074419;AK124269;AK309936;BAB15671;BAB15671.1;BC013888;BI560834;BM977002;CH236956;CH471091;DA442866;EAL23890;EAL23890.1;EAW76706;EAW76706.1;EAW76707;EU832667;EU832746;NC_000007;NG_013090;NM_018842…	A4D268;Q75L21;Q75L22;Q96CV4;Q9H5F5;Q9UHR4;Q9Y2M8	BAIAP2L1	BAI1-associated protein 2-like 1	BAI1-associated protein 2-like protein 1; insulin receptor tyrosine kinase substrate; brain-specific angiogenesis inhibitor 1-associated protein 2-like protein 1; OTTHUMP00000205450	Brain-specific angiogenesis inhibitor 1-associated protein 2-like protein 1	-0.3971	0.002698
21	A_72_P286389	ITGA8	8516	AC_000053;AC_000142;NC_000010;NM_003638;NP_003629;NT_008705;NW_001837931;NW_924584	AAA93514;AAA93514.1;AAI48353;AAQ56848;AAQ56848.2;ACA06009;ACA06009.1;AC_000053;AC_000142;AK297740;AK308240;AL359645;AL590636;AY371697;BAG60090;BC148352;CAH73424;CAH73424.1;CAI14955;CAI14955.1;CH471072;EAW86235;EAW86235.1;EF444991;L36531;NC_000010;NM_003638;NP_003629;NT_008705;NW_001837931;NW_924584;P53708	B0YJ31;P53708;Q5VX94	ITGA8	integrin, alpha 8	integrin alpha-8; OTTHUMP00000019207	Integrin alpha-8	-0.4234	0.005429
22	A_72_P076081	KIF18A	81930	AC_000054;AC_000143;NC_000011;NM_031217;NP_112494;NT_009237;NW_001838022;NW_925006	AAH26090;AAH48347;AAH48347.1;AAX16185;AAX16185.1;AB062483;AC023206;AC090159;AC_000054;AC_000143;AK093850;AK312576;AL136819;AM393105;AW770226;AY791349;BAB93508;BAB93508.1;BAG35470;BC026090;BC035917;BC048347;CAB66753;CAB66753.1;CAL37983;CH471064;CR610087;DB080843;EAW68271;NC_000011;NM_031217;NP_112494;NT_009237;NW_001838022;NW_925006;Q4G194;Q8NI77	Q4VPE3;Q86VS5;Q8NI77;Q9H0F3	KIF18A	kinesin family member 18A	kinesin-like protein KIF18A; OTTHUMP00000232145	Kinesin-like protein KIF18A	-0.3047	0.0004601
23	A_72_P078231	LOC728460	100505841	AC_000048;AC_000137;NC_000005;NM_001195535;NP_001182464;NT_034772;NW_001838952;NW_922751;XM_003118998;XM_003119956;XM_003120469;XP_003119046;XP_003120004;XP_003120517	AC010255;AC_000048;AC_000137;AI188208;BU567915;CBH19370;HC007130;NC_000005;NM_001195535;NP_001182464;NT_034772;NW_001838952;NW_922751;XM_003118998;XM_003119956;XM_003120469;XP_003119046;XP_003120004;XP_003120517	No ID	LOC100505841	zinc finger protein 474-like	hypothetical protein LOC100505841	hypothetical LOC728460	0.6704	0.008266
24	A_72_P170221	Large 60S subunit	6156	AC_000051;AC_000140;NC_000008;NM_000989;NP_000980;NT_008046;NW_001839136;NW_923984	AAC15858;AAC15858.1;AAH32700;AAH32700.1;AAH95426;AAH95426.1;AB070559;AC_000051;AC_000140;AK308890;AK312102;AL049968;AP003352;BAA05804;BAB79491;BAB79491.1;BAG35038;BAG35038.1;BC032700;BC095426;BM785413;BQ055546;CAA55820;CAA55820.1;CH471060;CR594202;D28438;EAW91769;EAW91770;EAW91770.1;EAW91771;L05095;NC_000008;NM_000989;NP_000980;NT_008046;NW_001839136;NW_923984;P62888;X79238	B2R591;P04645;P62888;Q502Z6	RPL30	ribosomal protein L30	OTTHUMP00000227630; OTTHUMP00000227550; OTTHUMP00000227629; OTTHUMP00000227601; 60S ribosomal protein L30		0.3511	0.006953
25	A_72_P001171	NEK4	6787	AC_000046;AC_000135;NC_000003;NM_001193533;NM_003157;NP_001180462;NP_003148;NT_022517;NW_001838877;NW_921651	AAA36658;AAA36658.1;AAH15515;AAH63044;AAH63044.1;ABQ59054;ABQ59054.1;AC006254;AC104446;AC_000046;AC_000135;AI860526;AK294165;AK312420;BAG35330;BAG35330.1;BAH11686;BC015515;BC063044;CH471055;DB073127;EAW65258;EF560744;L20321;NC_000003;NM_001193533;NM_003157;NP_001180462;NP_003148;NT_022517;NW_001838877;NW_921651;P51957;Q05DF6	A5YM70;B2R633;P51957;Q6P576	NEK4	NIMA (never in mitosis gene a)-related kinase 4	OTTHUMP00000213581; serine/threonine-protein kinase Nek4; nimA-related protein kinase 4; serine/threonine-protein kinase 2; never in mitosis A-related kinase 4; serine/threonine-protein kinase NRK2; OTTHUMP00000213582; OTTHUMP00000213580; serine/threonine protein kinase-2; serine/threonine kinase 2	Serine/threonine-protein kinase Nek4	-0.3631	0.001471
26	A_72_P413728	Neurolysin	57486	AC_000048;AC_000137;NC_000005;NM_020726;NP_065777;NT_006713;NW_001838935;NW_922618	AAH01644;AAH04985;AB033052;AB463138;AC008958;AC016643;AC_000048;AC_000137;AJ300837;AK026655;AK027602;AK096416;AK292803;AL834241;BAA86540;BAA86540.2;BAB55224;BAF85492;BAG53285;BAG72651;BC001644;BC004985;CA441264;CAC27329;CAC27329.1;CAD38918;CB992921;CH471137;CR613085;CR620384;EAW51338;EAW51339;EAW51340;NC_000005;NM_020726;NP_065777;NT_006713;NW_001838935;NW_922618;Q8NDD9;Q96K48;Q9BQD0;Q9BYT8	Q9BYT8;Q9ULJ4	NLN	neurolysin (metallopeptidase M3 family)	OTTHUMP00000222651; endopeptidase 24.16; angiotensin-binding protein; neurolysin, mitochondrial; angiotensin binding protein; microsomal endopeptidase; mitochondrial oligopeptidase M; neurotensin endopeptidase; OTTHUMP00000123454	Neurolysin, mitochondrial	-0.4005	0.0003239
27	A_72_P178251	PCBP-2	5094	AC_000055;AC_000144;NC_000012;NM_001098620;NM_001128911;NM_001128912;NM_001128913;NM_001128914;NM_005016;NM_031989;NP_001092090;NP_001122383;NP_001122384;NP_001122385;NP_001122386;NP_005007;NP_114366;NT_029419;NW_001838059;NW_925395	AAH01155;AAH01155.1;AAH71942;AAI07689;AB188306;AB208825;AC023509;AC068889;AC_000055;AC_000144;AK023529;AK123458;AK130583;AK225357;AK292141;AK299210;AK302067;BAD36897;BAD92062;BAF84830;BAG61249;BAG63457;BC001155;BC035420;BC071942;BC107688;BE748080;BF509278;BM764315;BU844465;CAA55015;CAA55015.1;CAJ42709;CH471054;CR590150;CR602496;CR603638;CR606382;CR620547;CS185528;CX164318;EAW96706;EAW96707;EAW967…	Q15366;Q6PKG5	PCBP2	poly(rC) binding protein 2	alpha-CP2; poly(rC)-binding protein 2; heterogeneous nuclear ribonucleoprotein E2; hnRNP E2; heterogenous nuclear ribonucleoprotein E2	Poly(rC)-binding protein 2	0.5455	0.001005
28	A_72_P127346	PGMU	5236	AC_000044;AC_000133;NC_000001;NG_016966;NM_001172818;NM_001172819;NM_002633;NP_001166289;NP_001166290;NP_002624;NT_032977;NW_001838579;NW_921351	AAA60080;AAA60080.1;AAB29177;AAB29177.2;AAB29178;AAH01756;AAH01756.3;AAH19920;AAH19920.1;AAH67763;AAH67763.2;AAH90856;AAH90856.1;AAP35607;AAP35607.1;ABM84712;ABM92235;AC_000044;AC_000133;AJ243265;AK293298;AK294186;AK298505;AK300100;AK312254;AL109925;BAG35186;BAG35186.1;BAG56819;BAG57502;BAG60712;BAH13208;BC001756;BC019920;BC067763;BC090856;BT006961;CAB92085;CAB92085.1;CAB92086;CAB92086.1;CAC19809…	B2R5N9;P36871;Q16105;Q5BKZ9;Q6NW22;Q86U74;Q96J40;Q9NTY4	PGM1	phosphoglucomutase 1	glucose phosphomutase 1; phosphoglucomutase-1; PGM 1; OTTHUMP00000010519; OTTHUMP00000010520	Phosphoglucomutase-1	-0.6979	0.003528
29	A_72_P203567	POLR3D	661	AC_000051;AC_000140;NC_000008;NM_001722;NP_001713;NT_167187;NW_001839127;NW_923907	AAA51838;AAA51838.1;AAA72377;AAA72377.1;AAH02603;AAH02603.1;AAH04484;AAH04484.1;AAK15371;AAK15371.1;AAM18216;AAM18216.1;AC105206;AC_000051;AC_000140;ADQ31797;AF346574;AK026588;AK295725;AY092086;BAG58566;BC000516;BC002603;BC003039;BC004484;BQ006609;CAG38747;CAG38747.1;CAG46602;CAG46602.1;CH471080;CR536509;CR541803;CR595334;CR598620;CR602098;CR609079;CR609971;CR611897;CR622854;EAW63689;EAW63690;EAW…	P05423;Q6FI28;Q9BPV7;Q9BPZ1;Q9BXB3	POLR3D	polymerase (RNA) III (DNA directed) polypeptide D, 44kDa	temperature sensitive complementation, cell cycle specific, tsBN51; DNA-directed RNA polymerase III subunit D; RPC53 homolog; RNA polymerase III 47 kDa subunit; OTTHUMP00000224864; OTTHUMP00000224866; DNA-directed RNA polymerase III 47 kDa polypeptide; BN51 (BHK21) temperature sensitivity complementing; DNA-directed RNA polymerase III subunit RPC4; RNA polymerase III subunit C4	DNA-directed RNA polymerase III subunit RPC4	-0.3084	0.003334
30	A_72_P227647	Parvalbumin alpha	5816	AC_000065;AC_000154;NC_000022;NM_002854;NP_002845;NT_011520;NW_001838745;NW_927628	AA771973;AAH69300;AAH69300.1;AAH96112;AAH96112.1;AAH96113;AAH96113.1;AAH96114;AAH96114.1;AAH96115;AAH96115.1;AC_000065;AC_000154;AI262242;AK311832;BAG34774;BAG34774.1;BC069300;BC096112;BC096113;BC096114;BC096115;CAA36924;CAA36924.1;CAA44792;CAA44792.1;CAA45134;CAA45134.1;CAG30438;CAG30438.1;CAI23584;CAI23584.1;CAI23585;CAI23585.1;CAK54583;CAK54882;CH471095;CR456552;CU013152;CU013440;EAW60118;EAW6…	B2R4H7;P20472;P78378;Q4VB78;Q5R3Q9	PVALB	parvalbumin	OTTHUMP00000197808; parvalbumin alpha; OTTHUMP00000197807; OTTHUMP00000197804; OTTHUMP00000197805	Parvalbumin alpha	0.8027	0.002787
31	A_72_P203567	RNA polymerase III	661	AC_000051;AC_000140;NC_000008;NM_001722;NP_001713;NT_167187;NW_001839127;NW_923907	AAA51838;AAA51838.1;AAA72377;AAA72377.1;AAH02603;AAH02603.1;AAH04484;AAH04484.1;AAK15371;AAK15371.1;AAM18216;AAM18216.1;AC105206;AC_000051;AC_000140;ADQ31797;AF346574;AK026588;AK295725;AY092086;BAG58566;BC000516;BC002603;BC003039;BC004484;BQ006609;CAG38747;CAG38747.1;CAG46602;CAG46602.1;CH471080;CR536509;CR541803;CR595334;CR598620;CR602098;CR609079;CR609971;CR611897;CR622854;EAW63689;EAW63690;EAW…	P05423;Q6FI28;Q9BPV7;Q9BPZ1;Q9BXB3	POLR3D	polymerase (RNA) III (DNA directed) polypeptide D, 44kDa	temperature sensitive complementation, cell cycle specific, tsBN51; DNA-directed RNA polymerase III subunit D; RPC53 homolog; RNA polymerase III 47 kDa subunit; OTTHUMP00000224864; OTTHUMP00000224866; DNA-directed RNA polymerase III 47 kDa polypeptide; BN51 (BHK21) temperature sensitivity complementing; DNA-directed RNA polymerase III subunit RPC4; RNA polymerase III subunit C4		-0.3084	0.003334
32	A_72_P170221	RPL30	6156	AC_000051;AC_000140;NC_000008;NM_000989;NP_000980;NT_008046;NW_001839136;NW_923984	AAC15858;AAC15858.1;AAH32700;AAH32700.1;AAH95426;AAH95426.1;AB070559;AC_000051;AC_000140;AK308890;AK312102;AL049968;AP003352;BAA05804;BAB79491;BAB79491.1;BAG35038;BAG35038.1;BC032700;BC095426;BM785413;BQ055546;CAA55820;CAA55820.1;CH471060;CR594202;D28438;EAW91769;EAW91770;EAW91770.1;EAW91771;L05095;NC_000008;NM_000989;NP_000980;NT_008046;NW_001839136;NW_923984;P62888;X79238	B2R591;P04645;P62888;Q502Z6	RPL30	ribosomal protein L30	OTTHUMP00000227630; OTTHUMP00000227550; OTTHUMP00000227629; OTTHUMP00000227601; 60S ribosomal protein L30	60S ribosomal protein L30	0.3511	0.006953
33	A_72_P079001	Sarcoglycan complex	6445	AC_000056;AC_000145;NC_000013;NG_008759;NM_000231;NP_000222;NT_024524;NW_001838070;NW_925473	AAC50269;AAC50269.1;AAD13475;AAD13475.1;AAH74777;AAH74777.1;AAH74778;AAH74778.1;AAI09322;AAI09322.1;AC_000056;AC_000145;AK290620;AK316579;AL157766;AL160256;AL356287;BAF83309;BAG38167;BC074777;BC074778;BC109321;CAI13924;CAI13924.1;CAI16053;CAI16053.1;CAI16544;CAI16544.1;CH471075;DA897096;EAX08320;EAX08321;NC_000013;NG_008759;NM_000231;NP_000222;NT_024524;NW_001838070;NW_925473;Q13326;U34976;U63389…	Q13326;Q32M32;Q5T9J6	SGCG	sarcoglycan, gamma (35kDa dystrophin-associated glycoprotein)	gamma-sarcoglycan; 35DAG; 35 kDa dystrophin-associated glycoprotein; gamma-SG; sarcoglycan, gamma (35kD dystrophin-associated glycoprotein); OTTHUMP00000018112; gamma sarcoglycan; 35kD dystrophin-associated glycoprotein		-0.804	0.002692
34	A_72_P024356	Suppressor of hairy wing homolog 2	140883	AC_000065;AC_000154;NC_000022;NG_000002;NM_080764;NP_542942;NT_011520;NW_001838745;NW_927628	AAH40020;AAH40020.1;ACE86619;ACE87300;AC_000065;AC_000154;AK097608;BAA20005;BAA20005.1;BAG53494;BC035376;BC040020;BC042370;CAG30500;CAG30500.1;CAK54642;CAK54941;CH471095;CR456614;CU013211;CU013499;D87009;EAW59515;EAW59516;EU831782;EU831860;NC_000022;NG_000002;NM_080764;NP_542942;NT_011520;NW_001838745;NW_927628;Q86YH2	Q86YH2	ZNF280B	zinc finger protein 280B	suppressor of hairy wing homolog 2; zinc finger protein 632; zinc finger protein 279; OTTHUMP00000199058; suppressor of hairy wing homolog 2 (Drosophila)	Zinc finger protein 280B	0.6686	0.00629
35	A_72_P000916	TTC39A	22996	AC_000044;AC_000133;NC_000001;NM_001080494;NM_001144832;NP_001073963;NP_001138304;NT_032977;NW_001838579;NW_921351	AAC39582;AAC39582.1;AAH04399;AAH04399.1;AAH28374;AAH28374.1;AAI60047;AB007921;AC_000044;AC_000133;AF007170;AK000220;AK298019;AK301587;AK311430;AL162430;AL671986;BAA32297;BAA32297.1;BAH12705;BAH13518;BC004399;BC028374;BC160047;CAI13021;CAI13021.1;CAI13022;CAI13022.1;CAI13023;CAI13023.1;CAI13024;CAI13024.1;CAI13025;CAI13025.1;CAI13026;CAI13026.1;CAI13027;CAI13027.1;CAI13028;CAI13028.1;CAI13131;CAI1…	O43417;O75040;Q5SRH5;Q5SRH6;Q5SRH7;Q5SRH8;Q5SRH9;Q5SRI0;Q5SRI1;Q5SRI2;Q5T7S1;Q6PIU8;Q9BT24	TTC39A	tetratricopeptide repeat domain 39A	differentially expressed in MCF7 with estradiol protein 6; tetratricopeptide repeat protein 39A; OTTHUMP00000009901; OTTHUMP00000009899; chromosome 1 open reading frame 34; TPR repeat protein 39A; OTTHUMP00000009902; OTTHUMP00000231716; OTTHUMP00000009903	Tetratricopeptide repeat protein 39A	0.2811	0.0003002
36	A_72_P036291	Thrombin	2147	AC_000054;AC_000143;NC_000011;NG_008953;NM_000506;NP_000497;NT_009237;NW_001838022;NW_925006	AAA60220;AAB24476;AAC63054;AAC63054.1;AAH51332;AAH51332.1;AAL77436;AAL77436.1;AAM11680;AAR08142;AAR08143;AC115088;ACE87074;ACE87755;AC_000054;AC_000143;AF478696;AF493953;AJ544114;AJ972449;AK222775;AK222777;AK293326;AK303747;AK312965;AY344793;AY344794;BAD96495;BAD96495.1;BAD96497;BAD96497.1;BAG35804;BAG35804.1;BAG56844;BAG64719;BAG64719.1;BC051332;CAA23842;CAA23842.1;CAD80258;CAJ01369;CAJ01369.1;C…	B2R7F7;B4E1A7;P00734;Q4QZ40;Q53H04;Q53H06;Q7Z7P3;Q9UCA1	F2	coagulation factor II (thrombin)	OTTHUMP00000197117; prothrombin; serine protease; prothrombin B-chain; OTTHUMP00000233661	Prothrombin	0.5013	0.004518
37	A_72_P391178	WDR71	80227	AC_000054;AC_000143;NC_000011;NM_025155;NP_079431;NT_167190;NW_001838028;NW_925106	AAH06142;AAH06142.2;AAH21541;AAH21541.1;AAH28628;AAH28628.1;AAP97194;AAP97194.1;AC_000054;AC_000143;ADQ32653;AF087895;AK021910;AK222501;AK225520;AK298258;AK309133;AK316394;AP002770;BAB13933;BAB13933.1;BAD96221;BAD96221.1;BAG60522;BAH14765;BC006142;BC021541;BC028628;BC028677;BC045774;CH471076;CR608221;CR621285;CR623159;EAW74917;EAW74917.1;EAW74918;EAW74919;HQ448172;NC_000011;NM_025155;NP_079431;NT…	A6NDR5;Q4G165;Q53HS9;Q7Z500;Q8TBU6;Q9BRP4;Q9HAB6	PAAF1	proteasomal ATPase-associated factor 1	WD repeat domain 71; OTTHUMP00000237779; OTTHUMP00000237788; OTTHUMP00000237785; OTTHUMP00000237778; OTTHUMP00000237784; OTTHUMP00000237782; WD repeat-containing protein 71	Proteasomal ATPase-associated factor 1	0.9454	0.008061
38	A_72_P193102	WFDC1	58189	AC_000059;AC_000148;NC_000016;NM_021197;NP_067020;NT_010498;NW_001838328;NW_926528	AAG15263;AAG15263.1;AAG16647;AAG16647.1;AAH29159;AAH29159.1;ABM84291;ABM87681;AC010551;AC_000059;AC_000148;AF169631;AF302109;AK075061;AL713785;BAC11377;BAC11377.1;BC029159;CH471114;CR595501;CR604862;CR608359;CR610530;CR615719;DQ893365;DQ896682;EAW95486;EAW95486.1;EAW95487;EAW95487.1;NC_000016;NM_021197;NP_067020;NT_010498;NW_001838328;NW_926528;Q9HC57	D3DUL7;Q8NC27;Q9HAU1;Q9HC57	WFDC1	WAP four-disulfide core domain 1	WAP four-disulfide core domain protein 1; ps20 growth inhibitor; WAP four-disulfide core domain 1 homolog; OTTHUMP00000174994; prostate stromal protein ps20	WAP four-disulfide core domain protein 1	0.7288	0.002448
39	A_72_P024356	ZNF280B	140883	AC_000065;AC_000154;NC_000022;NG_000002;NM_080764;NP_542942;NT_011520;NW_001838745;NW_927628	AAH40020;AAH40020.1;ACE86619;ACE87300;AC_000065;AC_000154;AK097608;BAA20005;BAA20005.1;BAG53494;BC035376;BC040020;BC042370;CAG30500;CAG30500.1;CAK54642;CAK54941;CH471095;CR456614;CU013211;CU013499;D87009;EAW59515;EAW59516;EU831782;EU831860;NC_000022;NG_000002;NM_080764;NP_542942;NT_011520;NW_001838745;NW_927628;Q86YH2	Q86YH2	ZNF280B	zinc finger protein 280B	suppressor of hairy wing homolog 2; zinc finger protein 632; zinc finger protein 279; OTTHUMP00000199058; suppressor of hairy wing homolog 2 (Drosophila)	Zinc finger protein 280B	0.6686	0.00629
40	A_72_P078231	ZNF474	133923	AC_000048;AC_000137;NC_000005;NM_207317;NP_997200;NT_034772;NW_001838952;NW_922751	AAI33023;AAI33023.1;AAI33027;AAI33027.1;AAS21253;AAS21253.1;AC010255;AC_000048;AC_000137;AK057483;AK290985;AY461732;BAB71507;BAB71507.1;BAF83674;BAF83674.1;BC133022;BC133026;CH471086;EAW48892;EAW48893;EAW48893.1;EAW48894;EAW48895;EAW48896;NC_000005;NM_207317;NP_997200;NT_034772;NW_001838952;NW_922751;Q6S9Z5	A8K4M0;Q6S9Z5;Q96M07	ZNF474	zinc finger protein 474	testis-specific zinc finger protein; TSZFP; OTTHUMP00000222998; 4933409D10Rik; OTTHUMP00000159157	Zinc finger protein 474	0.6704	0.008266
41	A_72_P078231	Zinc finger protein 474	133923	AC_000048;AC_000137;NC_000005;NM_207317;NP_997200;NT_034772;NW_001838952;NW_922751	AAI33023;AAI33023.1;AAI33027;AAI33027.1;AAS21253;AAS21253.1;AC010255;AC_000048;AC_000137;AK057483;AK290985;AY461732;BAB71507;BAB71507.1;BAF83674;BAF83674.1;BC133022;BC133026;CH471086;EAW48892;EAW48893;EAW48893.1;EAW48894;EAW48895;EAW48896;NC_000005;NM_207317;NP_997200;NT_034772;NW_001838952;NW_922751;Q6S9Z5	A8K4M0;Q6S9Z5;Q96M07	ZNF474	zinc finger protein 474	testis-specific zinc finger protein; TSZFP; OTTHUMP00000222998; 4933409D10Rik; OTTHUMP00000159157	Zinc finger protein 474	0.6704	0.008266
42	A_72_P286389	alpha-8/beta-1 integrin	8516	AC_000053;AC_000142;NC_000010;NM_003638;NP_003629;NT_008705;NW_001837931;NW_924584	AAA93514;AAA93514.1;AAI48353;AAQ56848;AAQ56848.2;ACA06009;ACA06009.1;AC_000053;AC_000142;AK297740;AK308240;AL359645;AL590636;AY371697;BAG60090;BC148352;CAH73424;CAH73424.1;CAI14955;CAI14955.1;CH471072;EAW86235;EAW86235.1;EF444991;L36531;NC_000010;NM_003638;NP_003629;NT_008705;NW_001837931;NW_924584;P53708	B0YJ31;P53708;Q5VX94	ITGA8	integrin, alpha 8	integrin alpha-8; OTTHUMP00000019207		-0.4234	0.005429
43	A_72_P204682	hnRNP A1	3178	AC_000055;AC_000144;NC_000012;NM_002136;NM_031157;NP_002127;NP_112420;NT_029419;NW_001838059;NW_925395	AAH02355;AAH02355.1;AAH04945;AAH09600;AAH09600.1;AAH12158;AAH12158.1;AAH33714;AAH33714.1;AAH52296;AAH52296.1;AAH70315;AAH70315.1;AAH71945;AAH73162;AAH74502;AAH74502.1;AAI03708;AAI03708.1;AAI04237;AAI04238;AAI21134;AC078778;AC_000055;AC_000144;AK129814;AK291113;AK298176;AK303303;AK308679;BAF83802;BAF83802.1;BAG60447;BAG64377;BC002355;BC004945;BC009600;BC012158;BC020442;BC033714;BC035253;BC052296;B…	A8K4Z8;P09651;Q3MIB7;Q6PJZ7	HNRNPA1	heterogeneous nuclear ribonucleoprotein A1	nuclear ribonucleoprotein particle A1 protein; single-strand RNA-binding protein; hnRNP core protein A1; single-strand DNA-binding protein UP1; helix-destabilizing protein; heterogeneous nuclear ribonucleoprotein B2 protein; heterogeneous nuclear ribonucleoprotein A1B protein; Putative heterogeneous nuclear ribonucleoprotein A1-like 3; hnRNP A1-like 3; hnRNP core protein A1-like 3; heterogeneous …	Heterogeneous nuclear ribonucleoprotein A1	1	0.0009085
44	A_72_P036291		2147	AC_000054;AC_000143;NC_000011;NG_008953;NM_000506;NP_000497;NT_009237;NW_001838022;NW_925006	AAA60220;AAB24476;AAC63054;AAC63054.1;AAH51332;AAH51332.1;AAL77436;AAL77436.1;AAM11680;AAR08142;AAR08143;AC115088;ACE87074;ACE87755;AC_000054;AC_000143;AF478696;AF493953;AJ544114;AJ972449;AK222775;AK222777;AK293326;AK303747;AK312965;AY344793;AY344794;BAD96495;BAD96495.1;BAD96497;BAD96497.1;BAG35804;BAG35804.1;BAG56844;BAG64719;BAG64719.1;BC051332;CAA23842;CAA23842.1;CAD80258;CAJ01369;CAJ01369.1;C…	B2R7F7;B4E1A7;P00734;Q4QZ40;Q53H04;Q53H06;Q7Z7P3;Q9UCA1	F2	coagulation factor II (thrombin)	OTTHUMP00000197117; prothrombin; serine protease; prothrombin B-chain; OTTHUMP00000233661		0.5013	0.004518
45	A_72_P077636		5173	AC_000063;AC_000152;NC_000020;NG_028027;NM_001190892;NM_001190898;NM_001190899;NM_001190900;NM_024411;NP_001177821;NP_001177827;NP_001177828;NP_001177829;NP_077722;NT_011387;NW_001838652;NW_927317	AAA58456;AAA58456.2;AAB59409.1;AAH26334;AAH26334.1;AAH32505.1;AAY53973;AAY53974;AAY53975;AAY53976;AAY53989;AAY53990;AAY53991;AAY53992;AC_000063;AC_000152;ADZ15893;AK289618;AK314908;AK316076;AL034562;AY902648;AY902649;AY902650;AY902651;AY902664;AY902665;AY902666;AY902667;BAF82307;BAF82307.1;BAG37420.1;BAH14447;BC026334;BC032505;CAA23767.1;CAA24999;CAA24999.1;CAB38875;CAB38875.1;CAG46607.1;CAG46627…	A8K0Q3;B2RC23;P01210;P01213;Q6FHC6;Q6FHE6	PDYN	prodynorphin	leu-enkephalin; beta-neoendorphin-dynorphin; proenkephalin-B; OTTHUMP00000030002; leumorphin; spinocerebellar ataxia 23; rimorphin; preproenkephalin B; preprodynorphin		-0.2458	0.006449
